# Supplementary material for: Effect of Autolyzed Yarrowia lipolytica on the Growth Performance, Antioxidant Capacity, Intestinal Histology, Microbiota, and Transcriptome Profile of Juvenile Largemouth Bass (Micropterus salmoides)
Source: MDPI journal article supplement (doi:10.3390/ijms231810780), 2022-09-15
Supplement: s1 [file s1]

Table S4. Partial of DEGs involved in growth, metabolism and immunity

| Treatment | Acronym          | Gene name                                                                 | Log2FC   | Regulated | FDR         |
|-----------|------------------|---------------------------------------------------------------------------|----------|-----------|-------------|
| YL25      | <i>Errfi1</i>    | <i>ERBB receptor feedback inhibitor 1</i>                                 | 1.292360 | down      | 0.0072430   |
|           | <i>Gadl1</i>     | <i>Acidic amino acid decarboxylase GADL1</i>                              | 1.474174 | up        | 0.0077045   |
|           | <i>Dusp5</i>     | <i>dual specificity phosphatase5</i>                                      | 1.471459 | down      | 2.52E-05    |
| YL50      | <i>Errfi1</i>    | <i>ERBB receptor feedback inhibitor 1</i>                                 | 2.581062 | down      | 5.17E-10    |
|           | <i>Fasn</i>      | <i>fatty acid synthase</i>                                                | 1.278785 | up        | 0.0003678   |
|           | <i>Fabp2</i>     | <i>fatty acid-binding protein, intestinal</i>                             | 1.508187 | up        | 0.000166486 |
|           | <i>Ftcd</i>      | <i>formimidoyltransferase-cyclodeaminase</i>                              | 1.117450 | up        | 0.0003119   |
|           | <i>Glde</i>      | <i>glycine decarboxylase</i>                                              | 1.247167 | up        | 0.0077539   |
|           | <i>Amy2a</i>     | <i>amylase alpha 2A</i>                                                   | 2.576246 | down      | 6.99E-11    |
|           | <i>Dusp1</i>     | <i>dual specificity phosphatase1</i>                                      | 1.222461 | down      | 0.0025691   |
|           | <i>Dusp5</i>     | <i>dual specificity phosphatase5</i>                                      | 1.393692 | down      | 0.0002042   |
| YL75      | <i>Socs1</i>     | <i>suppressor of cytokine signaling 1</i>                                 | 1.049256 | up        | 0.0054801   |
|           | <i>MAO</i>       | <i>flavin containing amine oxidoreductase</i>                             | 1.620982 | up        | 0.0003471   |
|           | <i>Tap2a</i>     | <i>transporter associated with antigen processing 2, subunit type a</i>   | 1.128581 | up        | 1.399E-07   |
|           | <i>MHC-I-I</i>   | <i>major histocompatibility complex class I-related gene protein-like</i> | 1.262056 | up        | 0.0026493   |
|           | <i>Tnfrsf10b</i> | <i>tumor necrosis factor receptor superfamily member 10B</i>              | 1.204773 | down      | 0.0097271   |

**Abbreviations:** 25%, 50%, 75% of the fish meal in the diet was replaced with YL, named as YL25, YL50, and YL75, respectively.
