# Supplementary material for: Effect of Autolyzed Yarrowia lipolytica on the Growth Performance, Antioxidant Capacity, Intestinal Histology, Microbiota, and Transcriptome Profile of Juvenile Largemouth Bass (Micropterus salmoides)
Source: MDPI journal article supplement (doi:10.3390/ijms231810780), 2022-09-15
Supplement: s1 [file s1]

**Table S5.** Amino acid composition of the fish meal and Lyophilized *Yarrowia**lipolytica* (dry matter basis, %)

| Amino acid | Fish meal | Lyophilized <i>Yarrowia lipolytica</i> |
|------------|-----------|----------------------------------------|
| Asp        | 4.64      | 3.95                                   |
| Thr        | 3.10      | 3.03                                   |
| Ser        | 6.06      | 2.60                                   |
| Glu        | 7.65      | 4.76                                   |
| Pro        | 5.56      | 2.66                                   |
| Gly        | 5.84      | 2.78                                   |
| Ala        | 3.53      | 4.64                                   |
| Cys-Cys    | 0.70      | 0.56                                   |
| Val        | 4.07      | 2.97                                   |
| Met        | 0.87      | 2.10                                   |
| Ile        | 2.94      | 2.60                                   |
| Leu        | 5.39      | 3.89                                   |
| Tyr        | 2.24      | 1.73                                   |
| Phe        | 3.11      | 2.34                                   |
| Lys        | 3.69      | 4.14                                   |
| His        | 0.87      | 1.49                                   |
| Arg        | 4.60      | 2.22                                   |
| Trp        | /         | 0.56                                   |
