# Supplementary material for: Effect of Autolyzed Yarrowia lipolytica on the Growth Performance, Antioxidant Capacity, Intestinal Histology, Microbiota, and Transcriptome Profile of Juvenile Largemouth Bass (Micropterus salmoides)
Source: MDPI journal article supplement (doi:10.3390/ijms231810780), 2022-09-15
Supplement: s1 [file s1]

**Table S9.** Primers used in quantitative real-time PCR

| Gene             | Primers sequence(5' – 3')                                    | Target size(bp) | Accession number |
|------------------|--------------------------------------------------------------|-----------------|------------------|
| <i>β-actin</i>   | F: TGGAAGGGACCTCACAGACTAC<br>R: GGGCAACGGAACCTCTCAT          | 231             | MH018565         |
| <i>Fasn</i>      | F: GGCAGCATACACACAGACCT<br>R: GTGGTATTTGGTCGCAGGGA           | 289             | XM_038735140.1   |
| <i>Dusp1</i>     | F: CATATCGGGCTCCACCAACG<br>R: AAAACGTTTCAAACCGCCTCTG         | 269             | XM_038700310.1   |
| <i>Dusp5</i>     | F: GGCCTTGCTCAATGTGTCTG<br>R: ATGTCGAAGGCCGCATCTA            | 258             | XM_038713959.1   |
| <i>Errfi1</i>    | F: GGCTTCTCTGGATTTTCATGTCTC<br>R: AGTGGAAAAGTGGACAGTGTGA     | 111             | XM_038722921.1   |
| <i>Tap2a</i>     | F: GTGCAGGACTCAATGGCTCT<br>R: CAAACCTGTCAACCTGCGTG           | 195             | XM_038725548.1   |
| <i>Mhc</i>       | F: GAAGATCAGAACCAACGAAGAGTC<br>R: TCAAACCTTCTGTGAGGACAAATACC | 100             | XM_038694736.1   |
| <i>Socs1l</i>    | F: GGAGGCTACAACTTGAACCG<br>R: GAAATGTCTGGTGAGGTGCAAT         | 144             | XM_038712981.1   |
| <i>Mao</i>       | F: TAATACAGATGCGCCCCTCG<br>R: TCGCTGCACTCAAACCTGATA          | 150             | XM_038721394.1   |
| <i>Socs3a</i>    | F: TTGGAGAAACGTTGAAGGCTGC<br>R: GCCCCAGTAGAAACCACTCT         | 202             | XM_038701477.1   |
| <i>Gad1l</i>     | F: CACAGCTGAGAAATGGCCTCA<br>R: GAACGCCACTCACAGACCTTTT        | 254             | XM_038712267.1   |
| <i>Ifi44l</i>    | F: GTCCAAGGCTCATATTCAGTCTTTC<br>R: GACTTTCCAGCTCCAAGTAT      | 236             | XM_038727646.1   |
| <i>Tnfrsf10b</i> | F: GGGGTTGGATGTAAGTGGTG<br>R: TGGAAAGGAAGGCAAGTGTC           | 150             | XM_038696919.1   |
