# Supplementary material for: Effect of Autolyzed Yarrowia lipolytica on the Growth Performance, Antioxidant Capacity, Intestinal Histology, Microbiota, and Transcriptome Profile of Juvenile Largemouth Bass (Micropterus salmoides)
Source: MDPI journal article supplement (doi:10.3390/ijms231810780), 2022-09-15
Supplement: s1 [file s1]

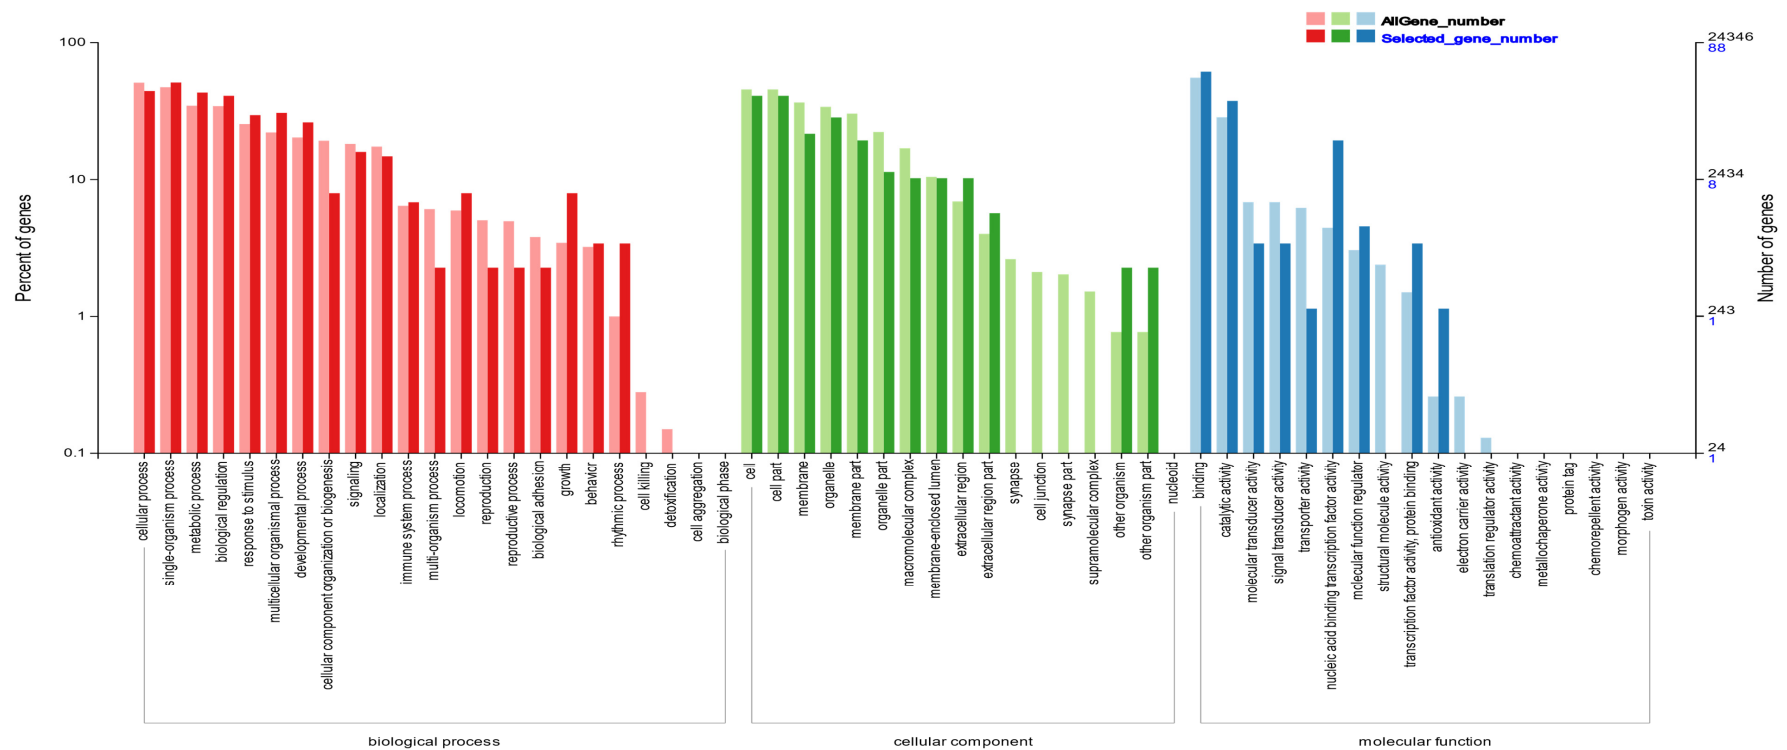

**Figure S1.** The GO functional classification of DEGs between YL25 and Con treatments. Con means the control diet; YL25 means 25% of the fish meal in the diet was replaced with YL
