# Supplementary material for: Effect of Autolyzed Yarrowia lipolytica on the Growth Performance, Antioxidant Capacity, Intestinal Histology, Microbiota, and Transcriptome Profile of Juvenile Largemouth Bass (Micropterus salmoides)
Source: MDPI journal article supplement (doi:10.3390/ijms231810780), 2022-09-15
Supplement: s1 [file s1]

**Table S2.** Alpha diversity of intestinal microbiota of largemouth bass fed the experimental diets for 28 days\*.

| Item    | Con                    | YL25                    | YL50                   | YL75                   |
|---------|------------------------|-------------------------|------------------------|------------------------|
| ACE     | 1898.93±489.29         | 1984.06±513.18          | 1300.84±271.40         | 1461.80±247.68         |
| Shannon | 9.92±0.22 <sup>a</sup> | 8.33±1.27 <sup>ab</sup> | 6.36±1.78 <sup>b</sup> | 9.72±0.02 <sup>a</sup> |
| Simpon  | 1.00±0.00 <sup>a</sup> | 0.94±0.06 <sup>ab</sup> | 0.82±0.12 <sup>b</sup> | 1.00±0.00 <sup>a</sup> |
| Chao1   | 1897.92±490.04         | 1983.52±513.08          | 1300.20±271.32         | 1459.93±248.04         |

**Abbreviations:** Con was the control diet. In the other 3 diets, 25%, 50%, 75% of the fish meal in the diet was replaced with YL, named as YL25, YL50, and YL75, respectively.

Bars assigned with different letters were significantly different ( $p < 0.05$ )
