# Supplementary material for: Effect of Autolyzed Yarrowia lipolytica on the Growth Performance, Antioxidant Capacity, Intestinal Histology, Microbiota, and Transcriptome Profile of Juvenile Largemouth Bass (Micropterus salmoides)
Source: MDPI journal article supplement (doi:10.3390/ijms231810780), 2022-09-15
Supplement: s1 [file s1]

**Table S3.** Reads and GC content of transcriptome sequence.

| Samples | Clean reads | Clean bases   | GC Content | %≥Q30  |
|---------|-------------|---------------|------------|--------|
| conI    | 20,091,039  | 6,004,089,864 | 47.04%     | 96.21% |
| conII   | 21,644,379  | 6,456,408,806 | 48.40%     | 97.02% |
| conIII  | 21,146,017  | 6,320,248,636 | 48.63%     | 96.80% |
| YL25I   | 20,646,689  | 6,169,456,966 | 47.63%     | 96.71% |
| YL25II  | 20,517,227  | 6,123,797,612 | 48.67%     | 96.69% |
| YL25III | 21,209,558  | 6,338,291,336 | 48.05%     | 96.70% |
| YL50I   | 20,079,215  | 6,003,054,836 | 48.49%     | 96.72% |
| YL50II  | 21,993,661  | 6,566,425,000 | 48.63%     | 96.70% |
| YL50III | 21,197,344  | 6,334,653,974 | 46.83%     | 96.29% |
| YL75I   | 20,843,766  | 6,230,819,350 | 48.23%     | 96.70% |
| YL75II  | 20,945,091  | 6,256,602,202 | 47.38%     | 96.80% |
| YL75III | 21,355,472  | 6,383,318,998 | 47.62%     | 97.00% |

**Abbreviations:** Con was the control diet. In the other 3 diets, 25%, 50%, 75% of the fish meal in the diet was replaced with YL, named as YL25, YL50, and YL75, respectively.
