# Supplementary material for: Effect of Autolyzed Yarrowia lipolytica on the Growth Performance, Antioxidant Capacity, Intestinal Histology, Microbiota, and Transcriptome Profile of Juvenile Largemouth Bass (Micropterus salmoides)
Source: MDPI journal article supplement (doi:10.3390/ijms231810780), 2022-09-15
Supplement: s1 [file s1]

**Table S1.** Raw reads and clean reads of 16 sRNA sequence

| Sample ID | Raw Reads | Clean Reads | Denoised Reads | Merged Reads | Non-chimeric Reads |
|-----------|-----------|-------------|----------------|--------------|--------------------|
| conI      | 80256     | 80160       | 79918          | 75345        | 72724              |
| conII     | 80056     | 79963       | 79776          | 76216        | 74187              |
| conIII    | 79979     | 79881       | 79500          | 72251        | 70275              |
| YL25I     | 79879     | 79793       | 79438          | 73171        | 70911              |
| YL25II    | 79905     | 79783       | 79217          | 69142        | 66561              |
| YL25III   | 79915     | 79800       | 79587          | 75273        | 73942              |
| YL50I     | 79916     | 79838       | 79657          | 76518        | 75378              |
| YL50II    | 80053     | 79946       | 79586          | 75089        | 73309              |
| YL50III   | 80160     | 80051       | 79821          | 76523        | 75532              |
| YL75I     | 79634     | 79531       | 79361          | 75368        | 72654              |
| YL75II    | 80178     | 80073       | 79766          | 76578        | 73849              |
| YL75III   | 80031     | 79920       | 79614          | 75020        | 72936              |

**Abbreviations:** Con was the control diet. In the other 3 diets, 25%, 50%, 75% of the fish meal in the diet was replaced with YL, named as YL25, YL50, and YL75, respectively.
