# Supplementary material for: Effect of Autolyzed Yarrowia lipolytica on the Growth Performance, Antioxidant Capacity, Intestinal Histology, Microbiota, and Transcriptome Profile of Juvenile Largemouth Bass (Micropterus salmoides)
Source: Int J Mol Sci. 2022 Sep 15;23(18):10780. doi: 10.3390/ijms231810780 (PMC9503160; doi:10.3390/ijms231810780)
Supplement: Supplementary file 1 [file ijms-23-10780-s001.zip › Table S6.xls]

#ID	gene_name	Con1_FPKM	Con1_count	Con2_FPKM	Con2_count	Con3_FPKM	Con3_count	YL25-1_FPKM	YL25-1_count	YL25-2_FPKM	YL25-2_count	YL25-3_FPKM	YL25-3_count	FDR	log2FC	regulated	COG_class	COG_class_annotation	GO_annotation	KEGG_annotation	KEGG_pathway_annotation	KOG_class	KOG_class_annotation	Pfam_annotation	Swiss_Prot_annotation	eggNOG_class	eggNOG_class_annotation	NR_annotation	GO_second_level_annotation
gene-LOC119913203	LOC119913203	1.081737	98	0.485774	46	0.450863	51	2.524349	271	2.355945	235	2.999604	297	0.000703847	1.545547173	up	--	--	Molecular Function: triglyceride lipase activity (GO:0004806);; Cellular Component: extracellular region (GO:0005576);; Biological Process: lipid metabolic process (GO:0006629);; Molecular Function: metal ion binding (GO:0046872);;	K19404|9.7e-229|lco:104938247|K19404 phosphatidic acid-selective phospholipase A1 [EC:3.1.1.-] | (RefSeq) lipase member H	--	--	--	Lipase	Lipase member H OS=Danio rerio OX=7955 GN=liph PE=2 SV=1	T	Signal transduction mechanisms	lipase member H [Morone saxatilis]	molecular function: catalytic activity (GO:0003824);; cellular component: extracellular region (GO:0005576);; biological process: metabolic process (GO:0008152);; biological process: single-organism process (GO:0044699);; molecular function: binding (GO:0005488)
gene-si:ch211-69b7.6	si:ch211-69b7.6	32.733025	5248	32.893597	5451	28.046917	5605	11.495636	2199	8.927038	1602	12.991051	2299	2.98E-05	-1.217097847	down	--	--	--	K23934|6.7e-246|lcf:108883943|K23934 neuroblast differentiation-associated protein AHNAK | (RefSeq) neuroblast differentiation-associated protein AHNAK-like	Salmonella infection (ko05132)	--	--	--	--	S	Function unknown	neuroblast differentiation-associated protein AHNAK isoform X1 [Amphiprion ocellaris]	--
gene-sik1	sik1	16.84922	2337	15.78495	2263	13.134863	2271	3.815794	632	1.934396	301	1.834016	281	3.31E-13	-2.144454687	down	[M]	Cell wall/membrane/envelope biogenesis	Molecular Function: protein serine/threonine kinase activity (GO:0004674);; Molecular Function: ATP binding (GO:0005524);;	K19008|0.0e+00|sdu:111218548|K19008 serine/threonine-protein kinase SIK1 [EC:2.7.11.1] | (RefSeq) serine/threonine-protein kinase SIK2-like	--	[R]	General function prediction only	Protein kinase domain	Serine/threonine-protein kinase SIK2 OS=Gallus gallus OX=9031 GN=SIK2 PE=2 SV=1	T	Signal transduction mechanisms	serine/threonine-protein kinase SIK1 [Morone saxatilis]	biological process: metabolic process (GO:0008152);; biological process: cellular process (GO:0009987);; molecular function: catalytic activity (GO:0003824);; molecular function: binding (GO:0005488)
gene-LOC119914921	LOC119914921	5.063018	222	6.411852	291	8.655094	473	2.158298	113	1.919216	95	0.693405	34	0.008027037	-1.380231563	down	--	--	--	--	--	--	--	--	--	--	--	--	--
Micropterus_salmoides_newGene_3430	--	78.591488	4369	86.03289	4734	49.74862	3114	18.61433	1364	19.358894	1128	14.582117	868	1.56E-05	-1.533587134	down	[F]	Nucleotide transport and metabolism	Molecular Function: purine-nucleoside phosphorylase activity (GO:0004731);; Biological Process: nucleoside metabolic process (GO:0009116);;	K03783|1.6e-118|lco:104932305|K03783 purine-nucleoside phosphorylase [EC:2.4.2.1] | (RefSeq) purine nucleoside phosphorylase	Purine metabolism (ko00230);; Pyrimidine metabolism (ko00240);; Nicotinate and nicotinamide metabolism (ko00760)	[F]	Nucleotide transport and metabolism	Phosphorylase superfamily	--	F	Nucleotide transport and metabolism	Purine nucleoside phosphorylase [Collichthys lucidus]	molecular function: catalytic activity (GO:0003824);; biological process: metabolic process (GO:0008152);; biological process: cellular process (GO:0009987);; biological process: single-organism process (GO:0044699)
gene-LOC119909373	LOC119909373	9.760698	1432	14.824288	2248	2.624511	480	0.443458	78	0.724665	119	0.780776	127	2.65E-06	-2.15011832	down	--	--	Molecular Function: ATP binding (GO:0005524);;	K22614|0.0e+00|lcf:108877195|K22614 NLR family CARD domain-containing protein 3 | (RefSeq) LOW QUALITY PROTEIN: protein NLRC3-like	--	[O]	Posttranslational modification, protein turnover, chaperones	Fish-specific NACHT associated domain	Neoverrucotoxin subunit beta OS=Synanceia verrucosa OX=51996 PE=1 SV=1	S	Function unknown	LOW QUALITY PROTEIN: NLR family CARD domain-containing protein 3 [Larimichthys crocea]	molecular function: binding (GO:0005488)
gene-LOC119917927	LOC119917927	15.510912	1353	19.712479	1777	16.127712	1753	7.450727	775	3.01913	295	7.068388	680	0.007736466	-1.184129454	down	--	--	Molecular Function: hyalurononglucosaminidase activity (GO:0004415);; Biological Process: carbohydrate metabolic process (GO:0005975);;	K01197|2.0e-245|sdu:111224583|K01197 hyaluronoglucosaminidase [EC:3.2.1.35] | (RefSeq) hyaluronidase PH-20-like	Glycosaminoglycan degradation (ko00531);; Lysosome (ko04142)	--	--	Hyaluronidase	Hyaluronidase-1 OS=Bitis arietans OX=8692 PE=2 SV=1	G	Carbohydrate transport and metabolism	hyaluronidase PH-20-like isoform X1 [Sander lucioperca]	molecular function: catalytic activity (GO:0003824);; biological process: metabolic process (GO:0008152)
gene-LOC119893956	LOC119893956	36.059005	1060	29.219506	889	51.200275	1877	10.771634	379	3.377999	112	8.10795	264	2.16E-05	-1.751110962	down	--	--	Molecular Function: RNA polymerase II transcription factor activity, sequence-specific DNA binding (GO:0000981);; Molecular Function: molecular_function (GO:0003674);; Molecular Function: DNA binding (GO:0003677);; Molecular Function: transcription factor activity, sequence-specific DNA binding (GO:0003700);; Biological Process: regulation of transcription, DNA-templated (GO:0006355);; Biological…	K09451|3.3e-80|malb:109961840|K09451 homeobox protein aristaless-like 4 | (RefSeq) intestine-specific homeobox-like	--	[R]	General function prediction only	Homeodomain	ALX homeobox protein 1 OS=Xenopus laevis OX=8355 GN=alx1 PE=2 SV=1	K	Transcription	intestine-specific homeobox-like [Larimichthys crocea]	biological process: biological regulation (GO:0065007);; molecular function: nucleic acid binding transcription factor activity (GO:0001071);; molecular function: binding (GO:0005488)
gene-LOC119888105	LOC119888105	16.716715	436	20.287876	546	142.205383	4614	4.109609	128	3.624601	106	7.734886	223	0.005020149	-1.579022713	down	[O]	Posttranslational modification, protein turnover, chaperones	Molecular Function: serine-type endopeptidase activity (GO:0004252);;	K01310|2.5e-145|lcf:108894207|K01310 chymotrypsin [EC:3.4.21.1] | (RefSeq) chymotrypsin B	--	[E]	Amino acid transport and metabolism	Trypsin	Chymotrypsin B OS=Gadus morhua OX=8049 PE=1 SV=1	E	Amino acid transport and metabolism	chymotrypsinogen 1 [Thunnus orientalis]	biological process: metabolic process (GO:0008152);; molecular function: catalytic activity (GO:0003824)
gene-dusp5	dusp5	21.985039	992	21.693207	1012	15.703355	883	7.713996	415	3.454332	175	5.482245	273	2.52E-05	-1.471458627	down	[T]	Signal transduction mechanisms	Molecular Function: protein tyrosine phosphatase activity (GO:0004725);; Molecular Function: MAP kinase tyrosine/serine/threonine phosphatase activity (GO:0017017);;	K04459|1.9e-207|lco:104922130|K04459 dual specificity MAP kinase phosphatase [EC:3.1.3.16 3.1.3.48] | (RefSeq) dusp5; dual specificity protein phosphatase 5	MAPK signaling pathway (ko04010)	[V]	Defense mechanisms	Dual specificity phosphatase, catalytic domain	Dual specificity protein phosphatase 1-A OS=Xenopus laevis OX=8355 GN=dusp1-a PE=1 SV=1	V	Defense mechanisms	dual specificity protein phosphatase 5 [Morone saxatilis]	biological process: metabolic process (GO:0008152);; biological process: cellular process (GO:0009987);; molecular function: catalytic activity (GO:0003824);; biological process: biological regulation (GO:0065007)
gene-LOC119904318	LOC119904318	2.820956	320	2.901223	340	2.403625	340	0.846692	115	0.709445	90	1.018751	128	0.000236798	-1.299251799	down	--	--	--	--	--	--	--	Cortactin-binding protein-2	Filamin A-interacting protein 1-like OS=Danio rerio OX=7955 GN=filip1l PE=2 SV=1	--	--	filamin A-interacting protein 1-like [Morone saxatilis]	--
gene-LOC119902398	LOC119902398	60.061954	3476	66.833595	3998	33.528538	2419	23.454647	1619	11.260863	730	12.7726	816	0.00121756	-1.34705743	down	--	--	Molecular Function: DNA binding (GO:0003677);; Molecular Function: transcription factor activity, sequence-specific DNA binding (GO:0003700);;	K04448|6.9e-155|lco:104927418|K04448 transcription factor AP-1 | (RefSeq) jun; transcription factor AP-1	MAPK signaling pathway (ko04010);; ErbB signaling pathway (ko04012);; Mitophagy - animal (ko04137);; Apoptosis (ko04210);; Wnt signaling pathway (ko04310);; Focal adhesion (ko04510);; Tight junction (ko04530);; Toll-like receptor signaling pathway (ko04620);; NOD-like receptor signaling pathway (ko04621);; C-type lectin receptor signaling pathway (ko04625);; GnRH signaling pathway (ko04912);; Sal…	[K]	Transcription	Jun-like transcription factor	Transcription factor AP-1 OS=Coturnix japonica OX=93934 GN=JUN PE=2 SV=1	K	Transcription	Transcription factor AP-1 [Larimichthys crocea]	molecular function: binding (GO:0005488);; biological process: biological regulation (GO:0065007);; molecular function: nucleic acid binding transcription factor activity (GO:0001071)
gene-LOC119905996	LOC119905996	7.7962	1059	10.057764	1412	6.867538	1163	3.25977	528	3.04029	463	3.102375	465	0.001080879	-1.107073353	down	[T]	Signal transduction mechanisms	Molecular Function: protein serine/threonine kinase activity (GO:0004674);; Molecular Function: ATP binding (GO:0005524);;	K08859|1.1e-235|sdu:111233801|K08859 serine/threonine kinase 35 [EC:2.7.11.1] | (RefSeq) serine/threonine-protein kinase 35-like	--	[OUT]	Posttranslational modification, protein turnover, chaperones;; Intracellular trafficking, secretion, and vesicular transport;; Signal transduction mechanisms	Protein kinase domain	Serine/threonine-protein kinase pdik1l OS=Danio rerio OX=7955 GN=pdik1l PE=2 SV=1	T	Signal transduction mechanisms	serine/threonine-protein kinase 35-like [Seriola dumerili]	biological process: metabolic process (GO:0008152);; biological process: cellular process (GO:0009987);; molecular function: catalytic activity (GO:0003824);; molecular function: binding (GO:0005488)
gene-LOC119908082	LOC119908082	15.375776	1053	8.860846	628	24.782772	2116	4.879726	399	1.960574	151	3.792467	287	0.000931582	-1.541449015	down	--	--	Biological Process: negative regulation of transcription from RNA polymerase II promoter (GO:0000122);; Molecular Function: transcription factor activity, sequence-specific DNA binding (GO:0003700);; Cellular Component: nucleus (GO:0005634);; Cellular Component: cytoplasm (GO:0005737);; Biological Process: cellular developmental process (GO:0048869);;	K11432|1.3e-84|nfu:107385249|K11432 [histone H3]-lysine9 N-trimethyltransferase PRDM2 [EC:2.1.1.355] | (RefSeq) PR domain zinc finger protein 2-like	Lysine degradation (ko00310)	[K]	Transcription	Zinc-finger double domain	PR domain zinc finger protein 10 OS=Danio rerio OX=7955 GN=prdm10 PE=3 SV=2	K	Transcription	PR domain zinc finger protein 1 isoform X2 [Morone saxatilis]	biological process: biological regulation (GO:0065007);; molecular function: nucleic acid binding transcription factor activity (GO:0001071);; cellular component: cell (GO:0005623);; cellular component: organelle (GO:0043226);; cellular component: cell part (GO:0044464);; biological process: cellular process (GO:0009987);; biological process: developmental process (GO:0032502);; biological proces…
gene-LOC119909419	LOC119909419	4.736267	308	3.602165	242	1.031608	84	0	0	0	0	0	0	1.95E-13	-3.095365865	down	--	--	--	K04402|1.2e-12|tng:GSTEN00031910G001|K04402 growth arrest and DNA-damage-inducible protein | (RefSeq) unnamed protein product	MAPK signaling pathway (ko04010);; FoxO signaling pathway (ko04068);; Cell cycle (ko04110);; p53 signaling pathway (ko04115);; Apoptosis (ko04210);; Cellular senescence (ko04218)	--	--	--	--	S	Function unknown	interferon-induced protein 44-like [Sparus aurata]	--
gene-LOC119909449	LOC119909449	1.5788	53	1.691322	58	1.031895	43	0.016195	1	0.002133	1	0.00605	1	2.70E-07	-2.358838176	down	--	--	--	K22614|5.9e-09|ola:110013539|K22614 NLR family CARD domain-containing protein 3 | (RefSeq) NACHT, LRR and PYD domains-containing protein 3-like isoform X1	--	--	--	Reverse transcriptase (RNA-dependent DNA polymerase)	--	S	Function unknown	PREDICTED: RNA-directed DNA polymerase from mobile element jockey-like, partial [Austrofundulus limnaeus]	--
gene-LOC119898107	LOC119898107	20.804123	1743	25.243923	2186	8.614288	900	37.33205	3730	121.49263	11389	79.148483	7315	0.007704518	1.474173801	up	[E]	Amino acid transport and metabolism	Biological Process: regulation of neurotransmitter levels (GO:0001505);; Molecular Function: molecular_function (GO:0003674);; Molecular Function: catalytic activity (GO:0003824);; Molecular Function: aspartate 1-decarboxylase activity (GO:0004068);; Cellular Component: cellular_component (GO:0005575);; Cellular Component: intracellular (GO:0005622);; Cellular Component: cell (GO:0005623);; Cellu…	K18966|2.7e-260|malb:109963866|K18966 sulfinoalanine decarboxylase / aspartate 1-decarboxylase [EC:4.1.1.29 4.1.1.11] | (RefSeq) gadl1; acidic amino acid decarboxylase GADL1	beta-Alanine metabolism (ko00410);; Taurine and hypotaurine metabolism (ko00430);; Pantothenate and CoA biosynthesis (ko00770)	[E]	Amino acid transport and metabolism	Pyridoxal-dependent decarboxylase conserved domain	Acidic amino acid decarboxylase GADL1 (Fragment) OS=Xenopus tropicalis OX=8364 GN=gadl1 PE=2 SV=2	E	Amino acid transport and metabolism	Acidic amino acid decarboxylase GADL1 Aspartate 1-decarboxylase [Channa argus]	biological process: biological regulation (GO:0065007);; molecular function: catalytic activity (GO:0003824);; cellular component: cell (GO:0005623);; cellular component: cell part (GO:0044464);; biological process: metabolic process (GO:0008152);; biological process: cellular process (GO:0009987);; biological process: single-organism process (GO:0044699);; biological process: behavior (GO:000761…
gene-LOC119887853	LOC119887853	5.946663	108	6.421696	121	4.731041	107	18.679966	404	13.517745	275	19.844845	397	9.91E-06	1.485677639	up	--	--	--	--	--	--	--	--	--	--	--	--	--
Micropterus_salmoides_newGene_3784	--	3.904761	546	5.619161	812	2.809893	490	0.389874	65	1.173725	184	0.461227	72	0.003807998	-1.534166324	down	--	--	Molecular Function: protein binding (GO:0005515);;	K23949|2.2e-61|sdu:111227563|K23949 sterile alpha motif domain-contaning protein 9 | (RefSeq) sterile alpha motif domain-containing protein 9-like	--	--	--	SAM domain (Sterile alpha motif)	--	S	Function unknown	hypothetical protein D5F01_LYC07645 [Larimichthys crocea]	molecular function: binding (GO:0005488)
gene-phlda2	phlda2	177.069183	3914	175.511826	4010	77.025078	2123	52.59174	1387	14.505004	359	28.148647	687	0.001845485	-1.507552229	down	--	--	Biological Process: positive regulation of apoptotic process (GO:0043065);; Molecular Function: phosphatidylinositol phosphate binding (GO:1901981);;	--	--	--	--	PH domain	Pleckstrin homology-like domain family A member 2 OS=Salmo salar OX=8030 GN=phlda2 PE=2 SV=1	T	Signal transduction mechanisms	pleckstrin homology-like domain family A member 2 [Mastacembelus armatus]	biological process: biological regulation (GO:0065007);; molecular function: binding (GO:0005488)
gene-LOC119886035	LOC119886035	6.348431	815	7.497019	994	3.00091	480	0.478663	74	0.161908	24	0.290816	42	8.88E-15	-2.903441008	down	--	--	Molecular Function: steroid hormone receptor activity (GO:0003707);; Molecular Function: RNA polymerase II transcription factor activity, ligand-activated sequence-specific DNA binding (GO:0004879);; Cellular Component: nucleus (GO:0005634);; Molecular Function: zinc ion binding (GO:0008270);; Cellular Component: host cell nucleus (GO:0042025);; Molecular Function: sequence-specific DNA binding (…	K04465|0.0e+00|lco:104931814|K04465 nuclear receptor subfamily 4 group A member 1 | (RefSeq) probable nuclear hormone receptor HR38	MAPK signaling pathway (ko04010)	[K]	Transcription	Ligand-binding domain of nuclear hormone receptor	Nuclear receptor subfamily 4 group A member 1 OS=Xenopus laevis OX=8355 GN=nr4a1 PE=2 SV=1	K	Transcription	Nuclear receptor subfamily 4 group A member 1 [Collichthys lucidus]	biological process: cellular process (GO:0009987);; biological process: signaling (GO:0023052);; biological process: single-organism process (GO:0044699);; biological process: response to stimulus (GO:0050896);; biological process: biological regulation (GO:0065007);; molecular function: signal transducer activity (GO:0004871);; molecular function: molecular transducer activity (GO:0060089);; mol…
gene-zgc:162730	zgc:162730	256.837982	18733	186.301575	14045	155.11644	14103	88.77243	7722	37.620869	3072	46.647255	3755	0.000204939	-1.413052499	down	--	--	Molecular Function: metal ion binding (GO:0046872);;	K15308|2.6e-173|lco:104928501|K15308 tristetraprolin | (RefSeq) mRNA decay activator protein ZFP36	--	[R]	General function prediction only	Zinc finger C-x8-C-x5-C-x3-H type (and similar)	mRNA decay activator protein ZFP36L2-A OS=Xenopus laevis OX=8355 GN=zfp36l2-A PE=1 SV=1	S	Function unknown	mRNA decay activator protein ZFP36L2 [Collichthys lucidus]	molecular function: binding (GO:0005488)
gene-junbb	junbb	558.458801	29233	572.056946	30952	275.960724	18007	102.759445	6416	16.626429	975	28.234253	1631	1.56E-05	-2.010525503	down	--	--	Biological Process: lymph vessel development (GO:0001945);; Molecular Function: DNA binding (GO:0003677);; Molecular Function: transcription factor activity, sequence-specific DNA binding (GO:0003700);; Cellular Component: nucleus (GO:0005634);; Biological Process: regulation of transcription from RNA polymerase II promoter (GO:0006357);; Biological Process: fin regeneration (GO:0031101);; Biolog…	K09028|8.0e-178|lcf:108898682|K09028 transcription factor jun-B | (RefSeq) transcription factor jun-B-like	--	[K]	Transcription	Jun-like transcription factor	Transcription factor jun-B OS=Cyprinus carpio OX=7962 GN=junb PE=2 SV=1	K	Transcription	PREDICTED: transcription factor jun-B-like [Lates calcarifer]	biological process: developmental process (GO:0032502);; biological process: single-organism process (GO:0044699);; molecular function: binding (GO:0005488);; biological process: biological regulation (GO:0065007);; molecular function: nucleic acid binding transcription factor activity (GO:0001071);; cellular component: cell (GO:0005623);; cellular component: organelle (GO:0043226);; cellular com…
gene-fosb	fosb	39.447102	6753	40.771543	7225	15.987917	3410	0.591127	122	0.132738	26	0.068843	14	9.14E-17	-3.403409732	down	--	--	Molecular Function: DNA binding (GO:0003677);; Molecular Function: transcription factor activity, sequence-specific DNA binding (GO:0003700);; Cellular Component: nucleus (GO:0005634);; Biological Process: regulation of transcription from RNA polymerase II promoter (GO:0006357);;	K09029|7.5e-195|mze:101478361|K09029 protein FosB | (RefSeq) fosb; protein fosB isoform X1	--	[K]	Transcription	bZIP transcription factor	Proto-oncogene c-Fos OS=Gallus gallus OX=9031 GN=FOS PE=1 SV=1	K	Transcription	PREDICTED: protein fosB isoform X1 [Stegastes partitus]	molecular function: binding (GO:0005488);; biological process: biological regulation (GO:0065007);; molecular function: nucleic acid binding transcription factor activity (GO:0001071);; cellular component: cell (GO:0005623);; cellular component: organelle (GO:0043226);; cellular component: cell part (GO:0044464)
gene-LOC119913232	LOC119913232	2.240939	278	1.713513	219	1.305122	202	5.149628	760	4.029564	558	4.678811	639	0.000138058	1.316891722	up	--	--	Molecular Function: protein binding (GO:0005515);;	K22614|0.0e+00|lcf:108896076|K22614 NLR family CARD domain-containing protein 3 | (RefSeq) protein NLRC3-like	--	--	--	NLRC4 helical domain HD2	--	S	Function unknown	NLR family CARD domain-containing protein 3-like [Sparus aurata]	molecular function: binding (GO:0005488)
gene-xaf1	xaf1	8.81759	302	8.54907	303	8.219172	351	26.825068	1096	13.65156	523	14.429296	545	0.006465739	1.039761864	up	--	--	--	--	--	--	--	Ubiquitin-Binding Zinc Finger	--	S	Function unknown	XIAP-associated factor 1 [Sander lucioperca]	--
gene-LOC119886689	LOC119886689	1.023215	45	0.421027	19	0.407251	22	2.705539	140	1.965278	95	3.912582	187	0.003389172	1.531749754	up	[I]	Lipid transport and metabolism	Molecular Function: fatty-acyl-CoA binding (GO:0000062);; Molecular Function: catalytic activity (GO:0003824);;	K13239|3.8e-171|mze:101479979|K13239 Delta3-Delta2-enoyl-CoA isomerase [EC:5.3.3.8] | (RefSeq) eci2; enoyl-CoA delta isomerase 2, mitochondrial	Fatty acid degradation (ko00071);; Peroxisome (ko04146)	[I]	Lipid transport and metabolism	Enoyl-CoA hydratase/isomerase	Acyl-CoA-binding domain-containing protein 5 OS=Xenopus tropicalis OX=8364 GN=acbd5 PE=2 SV=1	I	Lipid transport and metabolism	PREDICTED: enoyl-CoA delta isomerase 2, mitochondrial [Stegastes partitus]	molecular function: binding (GO:0005488);; molecular function: catalytic activity (GO:0003824)
gene-LOC119888646	LOC119888646	2.051627	287	2.101983	309	1.837315	325	0.69388	118	0.790439	124	0.725268	114	0.00411429	-1.106124675	down	[T]	Signal transduction mechanisms	Molecular Function: protein tyrosine phosphatase activity (GO:0004725);; Molecular Function: protein tyrosine/serine/threonine phosphatase activity (GO:0008138);;	K06639|1.1e-302|sdu:111236223|K06639 cell division cycle 14 [EC:3.1.3.16 3.1.3.48] | (RefSeq) cdc14a; dual specificity protein phosphatase CDC14A isoform X1	Cell cycle (ko04110)	[V]	Defense mechanisms	Dual specificity protein phosphatase, N-terminal half	Dual specificity protein phosphatase CDC14AB OS=Danio rerio OX=7955 GN=cdc14ab PE=3 SV=1	V	Defense mechanisms	dual specificity protein phosphatase CDC14AB isoform X1 [Epinephelus lanceolatus]	biological process: metabolic process (GO:0008152);; biological process: cellular process (GO:0009987);; molecular function: catalytic activity (GO:0003824)
gene-LOC119909890	LOC119909890	4.637308	222	5.041957	249	3.702113	220	9.09236	517	7.95242	425	9.816626	517	0.008027037	1.002944536	up	--	--	--	--	--	--	--	Secreted Novel AID/APOBEC-like Deaminase 1	--	--	--	uncharacterized protein LOC115595561 isoform X2 [Sparus aurata]	--
gene-egr1	egr1	98.077995	9430	85.411552	8488	55.951111	6706	12.889264	1478	4.647559	501	13.032149	1383	6.57E-09	-2.188829452	down	--	--	Molecular Function: DNA binding (GO:0003677);; Cellular Component: nucleus (GO:0005634);; Molecular Function: metal ion binding (GO:0046872);; Biological Process: embryonic viscerocranium morphogenesis (GO:0048703);; Biological Process: embryonic retina morphogenesis in camera-type eye (GO:0060059);;	K09203|2.3e-200|lcf:108882957|K09203 early growth response protein 1 | (RefSeq) LOW QUALITY PROTEIN: early growth response protein 1-like	Apelin signaling pathway (ko04371);; GnRH signaling pathway (ko04912)	[R]	General function prediction only	Domain of unknown function (DUF3432)	Early growth response protein 1 OS=Danio rerio OX=7955 GN=egr1 PE=2 SV=2	K	Transcription	early growth response protein 1 [Epinephelus lanceolatus]	molecular function: binding (GO:0005488);; cellular component: cell (GO:0005623);; cellular component: organelle (GO:0043226);; cellular component: cell part (GO:0044464);; biological process: multicellular organismal process (GO:0032501);; biological process: developmental process (GO:0032502);; biological process: single-organism process (GO:0044699)
gene-LOC119914736	LOC119914736	1.611969	83	2.711292	143	36.341946	2310	0.412499	26	0.37105	22	0.547227	31	0.005741973	-1.530673075	down	[I]	Lipid transport and metabolism	Biological Process: retinoid metabolic process (GO:0001523);; Biological Process: system process (GO:0003008);; Molecular Function: molecular_function (GO:0003674);; Molecular Function: catalytic activity (GO:0003824);; Molecular Function: phospholipase activity (GO:0004620);; Molecular Function: lysophospholipase activity (GO:0004622);; Molecular Function: sterol esterase activity (GO:0004771);;…	K12298|1.5e-296|lco:109143108|K12298 bile salt-stimulated lipase [EC:3.1.1.3 3.1.1.13] | (RefSeq) bile salt-activated lipase isoform X1	Steroid biosynthesis (ko00100);; Glycerolipid metabolism (ko00561)	[R]	General function prediction only	Carboxylesterase family	Acetylcholinesterase OS=Tetronarce californica OX=7787 GN=ache PE=1 SV=2	I	Lipid transport and metabolism	bile salt-activated lipase isoform X1 [Larimichthys crocea]	biological process: metabolic process (GO:0008152);; biological process: cellular process (GO:0009987);; biological process: single-organism process (GO:0044699);; biological process: multicellular organismal process (GO:0032501);; molecular function: catalytic activity (GO:0003824);; molecular function: binding (GO:0005488);; cellular component: extracellular region (GO:0005576);; cellular compo…
gene-LOC119914953	LOC119914953	1.243591	74	5.926749	364	2.668773	198	0.059115	5	0.09188	7	0	0	1.32E-06	-2.256428396	down	--	--	Molecular Function: GTP binding (GO:0005525);;	K12800|1.7e-111|mze:106675363|K12800 NACHT, LRR and PYD domains-containing protein 3 | (RefSeq) NACHT, LRR and PYD domains-containing protein 12	Necroptosis (ko04217);; NOD-like receptor signaling pathway (ko04621);; C-type lectin receptor signaling pathway (ko04625);; Salmonella infection (ko05132)	--	--	AIG1 family	--	S	Function unknown	uncharacterized protein LOC116057118 [Sander lucioperca]	molecular function: binding (GO:0005488)
gene-LOC119897558	LOC119897558	1.888031	239	1.67834	219	2.423663	382	0.903839	137	0.481588	69	0.580376	81	0.001697692	-1.249420627	down	--	--	Molecular Function: transcription regulatory region sequence-specific DNA binding (GO:0000976);; Biological Process: circadian regulation of gene expression (GO:0032922);;	K21599|1.6e-194|sdu:111230139|K21599 circadian-associated transcriptional repressor | (RefSeq) circadian-associated transcriptional repressor-like	--	--	--	Circadian-associated transcriptional repressor	--	S	Function unknown	circadian-associated transcriptional repressor-like [Seriola dumerili]	molecular function: binding (GO:0005488);; biological process: multicellular organismal process (GO:0032501);; biological process: single-organism process (GO:0044699);; biological process: rhythmic process (GO:0048511);; biological process: biological regulation (GO:0065007)
gene-ier2a	ier2a	56.324253	3655	93.610909	6278	13.942571	1128	11.663328	903	4.145402	302	5.285894	379	0.000963282	-1.700811605	down	--	--	Molecular Function: transcription regulatory region sequence-specific DNA binding (GO:0000976);; Molecular Function: RNA polymerase II regulatory region sequence-specific DNA binding (GO:0000977);; Molecular Function: RNA polymerase II transcription factor activity, sequence-specific DNA binding (GO:0000981);; Molecular Function: RNA polymerase II regulatory region DNA binding (GO:0001012);; Mole…	--	--	--	--	Immediate early response protein (IER)	Immediate early response gene 2 protein OS=Danio rerio OX=7955 GN=ier2 PE=1 SV=1	S	Function unknown	immediate early response gene 2 protein-like [Anarrhichthys ocellatus]	molecular function: binding (GO:0005488);; biological process: biological regulation (GO:0065007);; molecular function: nucleic acid binding transcription factor activity (GO:0001071);; cellular component: cell (GO:0005623);; cellular component: cell part (GO:0044464);; cellular component: organelle (GO:0043226);; cellular component: organelle part (GO:0044422);; biological process: metabolic pro…
gene-LOC119905676	LOC119905676	28.965855	1793	38.770793	2475	16.294115	1268	6.425554	477	7.199505	500	9.778572	673	0.007243497	-1.292360161	down	--	--	Biological Process: regulation of cytokine production (GO:0001817);; Biological Process: negative regulation of cytokine production (GO:0001818);; Biological Process: regulation of protein phosphorylation (GO:0001932);; Biological Process: negative regulation of protein phosphorylation (GO:0001933);; Biological Process: vasculature development (GO:0001944);; Molecular Function: molecular_function…	K08886|9.8e-18|cmk:103183178|K08886 activated CDC42 kinase 1 [EC:2.7.10.2 2.7.11.1] | (RefSeq) tnk2; tyrosine kinase non receptor 2	--	--	--	--	--	T	Signal transduction mechanisms	ERBB receptor feedback inhibitor 1 [Morone saxatilis]	biological process: biological regulation (GO:0065007);; biological process: multicellular organismal process (GO:0032501);; biological process: developmental process (GO:0032502);; biological process: single-organism process (GO:0044699);; molecular function: molecular function regulator (GO:0098772);; molecular function: binding (GO:0005488);; cellular component: cell (GO:0005623);; cellular co…
gene-fosl1a	fosl1a	6.527262	399	6.340776	401	4.350519	332	0.430033	33	0.280059	20	0.645449	44	1.25E-14	-2.688981692	down	--	--	Molecular Function: DNA binding (GO:0003677);; Molecular Function: transcription factor activity, sequence-specific DNA binding (GO:0003700);; Cellular Component: nucleus (GO:0005634);; Biological Process: regulation of transcription from RNA polymerase II promoter (GO:0006357);;	K09030|1.9e-129|lco:104931557|K09030 fos-like antigen 2 | (RefSeq) fosl1; fos-related antigen 1	--	[K]	Transcription	bZIP transcription factor	Proto-oncogene c-Fos OS=Gallus gallus OX=9031 GN=FOS PE=1 SV=1	K	Transcription	fos-related antigen 1 isoform X1 [Labrus bergylta]	molecular function: binding (GO:0005488);; biological process: biological regulation (GO:0065007);; molecular function: nucleic acid binding transcription factor activity (GO:0001071);; cellular component: cell (GO:0005623);; cellular component: organelle (GO:0043226);; cellular component: cell part (GO:0044464)
gene-si:ch73-52p7.1	si:ch73-52p7.1	2.148451	155	2.033437	152	2.071725	186	0.967059	83	0.666815	54	0.673768	54	0.005160021	-1.120247172	down	--	--	--	--	--	--	--	Domain of unknown function (DUF4571)	--	S	Function unknown	uncharacterized protein LOC113132218 [Mastacembelus armatus]	--
gene-rhpn2	rhpn2	18.512629	2247	15.358161	1924	23.616382	3582	6.732019	974	6.8489	930	7.287126	974	0.001407204	-1.145818829	down	--	--	Biological Process: signal transduction (GO:0007165);;	K18040|1.8e-30|amex:103026294|K18040 tyrosine-protein phosphatase non-receptor type 23 [EC:3.1.3.48] | (RefSeq) ptpn23; tyrosine-protein phosphatase non-receptor type 23 isoform X1	--	[R]	General function prediction only	BRO1-like domain	Rhophilin-2 OS=Danio rerio OX=7955 GN=rhpn2 PE=2 SV=1	S	Function unknown	rhophilin-2 isoform X2 [Morone saxatilis]	biological process: cellular process (GO:0009987);; biological process: biological regulation (GO:0065007)
Micropterus_salmoides_newGene_132	--	96.197304	5170	58.62928	3257	79.831863	5348	377.205719	24177	325.226501	19563	153.12767	9081	0.000120175	1.567574196	up	--	--	Cellular Component: integral component of membrane (GO:0016021);;	--	--	--	--	Domain of unknown function (DUF4731)	--	S	Function unknown	small integral membrane protein 1 [Labrus bergylta]	cellular component: membrane (GO:0016020);; cellular component: membrane part (GO:0044425)
gene-ptgs2b	ptgs2b	1.09961	80	1.542356	116	0.908215	82	0.284373	25	0.141776	12	0.311139	25	0.003673626	-1.476619234	down	[QV]	Secondary metabolites biosynthesis, transport and catabolism;; Defense mechanisms	Molecular Function: peroxidase activity (GO:0004601);; Molecular Function: prostaglandin-endoperoxide synthase activity (GO:0004666);; Biological Process: inflammatory response (GO:0006954);; Biological Process: response to oxidative stress (GO:0006979);; Biological Process: regulation of blood pressure (GO:0008217);; Biological Process: cyclooxygenase pathway (GO:0019371);; Molecular Function: h…	K11987|0.0e+00|sdu:111219627|K11987 prostaglandin-endoperoxide synthase 2 [EC:1.14.99.1] | (RefSeq) ptgs2; prostaglandin G/H synthase 2	Arachidonic acid metabolism (ko00590);; VEGF signaling pathway (ko04370);; C-type lectin receptor signaling pathway (ko04625)	[R]	General function prediction only	Animal haem peroxidase	Prostaglandin G/H synthase 2 OS=Gallus gallus OX=9031 GN=PTGS2 PE=2 SV=1	T	Signal transduction mechanisms	cyclooxygenase 2 [Oplegnathus fasciatus]	biological process: metabolic process (GO:0008152);; biological process: cellular process (GO:0009987);; biological process: single-organism process (GO:0044699);; biological process: response to stimulus (GO:0050896);; biological process: detoxification (GO:0098754);; molecular function: catalytic activity (GO:0003824);; molecular function: antioxidant activity (GO:0016209);; biological process:…
gene-LOC119912990	LOC119912990	0.824589	79	0.351532	35	3.940585	468	0.176843	21	0.085557	10	0.081027	9	0.006881907	-1.538547017	down	[F]	Nucleotide transport and metabolism	Molecular Function: nucleic acid binding (GO:0003676);; Molecular Function: hydrolase activity (GO:0016787);; Molecular Function: metal ion binding (GO:0046872);;	K15049|1.1e-31|phyp:113523697|K15049 endonuclease domain-containing 1 protein | (RefSeq) endonuclease domain-containing 1 protein-like	--	--	--	DNA/RNA non-specific endonuclease	--	S	Function unknown	mucin-2-like [Etheostoma spectabile]	molecular function: binding (GO:0005488);; molecular function: catalytic activity (GO:0003824)
gene-ppp1r15b	ppp1r15b	56.0886	4447	54.620613	4476	42.142544	4165	22.82406	2158	8.448704	750	9.951409	871	0.000138058	-1.48205409	down	--	--	--	K17558|1.6e-258|sdu:111229669|K17558 protein phosphatase 1 regulatory subunit 15B | (RefSeq) protein phosphatase 1 regulatory subunit 15A-like	--	--	--	Phosphatase-1 catalytic subunit binding region	--	S	Function unknown	protein phosphatase 1 regulatory subunit 15A-like [Seriola lalandi dorsalis]	--
gene-LOC119900142	LOC119900142	31.610832	2866	41.240421	3864	10.518425	1189	3.935007	426	0.844834	86	1.780843	179	1.01E-06	-2.201064906	down	--	--	Biological Process: response to acid chemical (GO:0001101);; Cellular Component: cellular_component (GO:0005575);; Cellular Component: cell (GO:0005623);; Cellular Component: plasma membrane (GO:0005886);; Biological Process: multicellular organism development (GO:0007275);; Biological Process: nervous system development (GO:0007399);; Biological Process: central nervous system development (GO:00…	K17270|1.5e-54|lco:104937830|K17270 myelin-oligodendrocyte glycoprotein | (RefSeq) myelin-oligodendrocyte glycoprotein-like isoform X1	--	--	--	Immunoglobulin V-set domain	--	S	Function unknown	butyrophilin subfamily 1 member A1-like [Epinephelus lanceolatus]	biological process: response to stimulus (GO:0050896);; cellular component: cell (GO:0005623);; cellular component: membrane (GO:0016020);; cellular component: cell part (GO:0044464);; biological process: multicellular organismal process (GO:0032501);; biological process: developmental process (GO:0032502);; biological process: single-organism process (GO:0044699);; cellular component: membrane p…
gene-LOC119894165	LOC119894165	15.027883	663	13.399984	611	13.931036	766	5.022513	265	2.111616	105	3.36049	164	6.80E-07	-1.632759783	down	--	--	Molecular Function: cyclin-dependent protein serine/threonine kinase inhibitor activity (GO:0004861);; Cellular Component: nucleus (GO:0005634);; Biological Process: cell cycle arrest (GO:0007050);; Biological Process: regulation of mitotic cell cycle (GO:0007346);;	K09993|2.0e-100|lcf:108883053|K09993 cyclin-dependent kinase inhibitor 1C | (RefSeq) cyclin-dependent kinase inhibitor 1C-like	Cell cycle (ko04110)	[T]	Signal transduction mechanisms	Cyclin-dependent kinase inhibitor	--	T	Signal transduction mechanisms	cyclin-dependent kinase inhibitor 1C [Morone saxatilis]	biological process: biological regulation (GO:0065007);; molecular function: molecular function regulator (GO:0098772);; cellular component: cell (GO:0005623);; cellular component: organelle (GO:0043226);; cellular component: cell part (GO:0044464);; biological process: cellular process (GO:0009987);; biological process: single-organism process (GO:0044699)
gene-LOC119883997	LOC119883997	22.699299	611	22.992386	641	24.293282	814	8.763222	282	9.505284	287	8.067556	241	0.000683747	-1.116229785	down	--	--	Molecular Function: calcium ion binding (GO:0005509);;	K19481|4.6e-43|sdu:111223764|K19481 matrix Gla protein | (RefSeq) mgp; matrix Gla protein	--	--	--	--	Matrix Gla protein OS=Argyrosomus regius OX=172269 GN=mgp PE=1 SV=1	T	Signal transduction mechanisms	matrix Gla protein [Cottoperca gobio]	molecular function: binding (GO:0005488)
gene-ciarta	ciarta	20.419987	2024	12.624956	1293	15.582888	1925	8.3647	989	5.931244	658	4.864445	532	0.008027037	-1.055922222	down	--	--	Molecular Function: transcription regulatory region sequence-specific DNA binding (GO:0000976);; Biological Process: circadian regulation of gene expression (GO:0032922);;	K21599|3.0e-135|lcf:108888885|K21599 circadian-associated transcriptional repressor | (RefSeq) circadian-associated transcriptional repressor-like	--	--	--	Circadian-associated transcriptional repressor	--	S	Function unknown	circadian associated repressor of transcription a [Morone saxatilis]	molecular function: binding (GO:0005488);; biological process: multicellular organismal process (GO:0032501);; biological process: single-organism process (GO:0044699);; biological process: rhythmic process (GO:0048511);; biological process: biological regulation (GO:0065007)
gene-LOC119900148	LOC119900148	117.345009	6262	135.733688	7487	28.056953	1867	7.120327	454	0.44998	27	1.440043	85	3.93E-05	-2.006790527	down	--	--	Biological Process: response to acid chemical (GO:0001101);; Cellular Component: cellular_component (GO:0005575);; Cellular Component: cell (GO:0005623);; Cellular Component: plasma membrane (GO:0005886);; Biological Process: multicellular organism development (GO:0007275);; Biological Process: nervous system development (GO:0007399);; Biological Process: central nervous system development (GO:00…	K17270|9.1e-70|lco:104937830|K17270 myelin-oligodendrocyte glycoprotein | (RefSeq) myelin-oligodendrocyte glycoprotein-like isoform X1	--	--	--	Immunoglobulin V-set domain	--	S	Function unknown	Selection and upkeep of intraepithelial T-cells protein 1 [Larimichthys crocea]	biological process: response to stimulus (GO:0050896);; cellular component: cell (GO:0005623);; cellular component: membrane (GO:0016020);; cellular component: cell part (GO:0044464);; biological process: multicellular organismal process (GO:0032501);; biological process: developmental process (GO:0032502);; biological process: single-organism process (GO:0044699);; cellular component: membrane p…
gene-socs3a	socs3a	310.580185	18062	173.314076	10411	137.484505	10041	65.792995	4586	30.648138	2007	40.644322	2615	2.98E-05	-1.648111911	down	--	--	Biological Process: JAK-STAT cascade (GO:0007259);; Biological Process: intracellular signal transduction (GO:0035556);; Biological Process: negative regulation of apoptotic process (GO:0043066);;	K04696|1.1e-108|lcf:108902726|K04696 suppressor of cytokine signaling 3 | (RefSeq) socs3; suppressor of cytokine signaling 3	Ubiquitin mediated proteolysis (ko04120);; Insulin signaling pathway (ko04910);; Adipocytokine signaling pathway (ko04920);; Herpes simplex virus 1 infection (ko05168)	[T]	Signal transduction mechanisms	SH2 domain	Suppressor of cytokine signaling 3 OS=Gallus gallus OX=9031 GN=SOCS3 PE=2 SV=1	T	Signal transduction mechanisms	suppressor of cytokine signaling 3, partial [Siniperca chuatsi]	biological process: cellular process (GO:0009987);; biological process: signaling (GO:0023052);; biological process: single-organism process (GO:0044699);; biological process: response to stimulus (GO:0050896);; biological process: biological regulation (GO:0065007)
gene-LOC119917406	LOC119917406	2.016165	87	2.098091	94	21.63875	1157	0.114286	6	0.273283	14	0.371375	18	0.002035531	-1.641292652	down	--	--	Molecular Function: triglyceride lipase activity (GO:0004806);; Cellular Component: extracellular region (GO:0005576);; Biological Process: lipid catabolic process (GO:0016042);; Molecular Function: metal ion binding (GO:0046872);;	K14074|5.4e-236|lco:104939162|K14074 pancreatic lipase-related protein 1 [EC:3.1.1.3] | (RefSeq) inactive pancreatic lipase-related protein 1 isoform X1	Glycerolipid metabolism (ko00561)	--	--	Lipase	Lipoprotein lipase OS=Gallus gallus OX=9031 GN=LPL PE=1 SV=1	T	Signal transduction mechanisms	Inactive pancreatic lipase-related protein 1 [Collichthys lucidus]	molecular function: catalytic activity (GO:0003824);; cellular component: extracellular region (GO:0005576);; biological process: metabolic process (GO:0008152);; biological process: single-organism process (GO:0044699);; molecular function: binding (GO:0005488)
gene-LOC119890366	LOC119890366	75.597717	2256	25.43549	785	90.349411	3361	3.839987	137	11.534394	386	7.346294	242	0.000527913	-1.73871092	down	--	--	Molecular Function: metalloendopeptidase activity (GO:0004222);; Molecular Function: zinc ion binding (GO:0008270);;	K18543|1.0e-58|mze:101468145|K18543 choriolysin H [EC:3.4.24.67] | (RefSeq) high choriolytic enzyme 1	--	[O]	Posttranslational modification, protein turnover, chaperones	Astacin (Peptidase family M12A)	High choriolytic enzyme 1 OS=Oryzias latipes OX=8090 GN=hcea PE=1 SV=1	O	Posttranslational modification, protein turnover, chaperones	high choriolytic enzyme 1-like [Epinephelus lanceolatus]	biological process: metabolic process (GO:0008152);; molecular function: catalytic activity (GO:0003824);; molecular function: binding (GO:0005488)
gene-hspb9	hspb9	58.015049	1887	100.329498	3372	15.163235	615	10.561153	410	1.769579	65	3.4598	125	0.000660981	-1.766431236	down	--	--	--	--	--	--	--	Hsp20/alpha crystallin family	--	S	Function unknown	hypothetical protein D5F01_LYC18997 [Larimichthys crocea]	--
gene-LOC119896555	LOC119896555	0.447164	26	0.759039	46	0.827674	60	2.725156	187	3.02666	195	3.053225	194	1.83E-05	1.730907368	up	--	--	Molecular Function: calcium-dependent cysteine-type endopeptidase activity (GO:0004198);; Biological Process: proteolysis (GO:0006508);;	K08582|3.1e-224|sdu:111235492|K08582 calpain-15 [EC:3.4.22.-] | (RefSeq) calpain-15-like	--	[OT]	Posttranslational modification, protein turnover, chaperones;; Signal transduction mechanisms	Calpain family cysteine protease	--	--	--	PREDICTED: calpain-15-like isoform X2 [Lates calcarifer]	biological process: metabolic process (GO:0008152);; molecular function: catalytic activity (GO:0003824)
gene-LOC119897340	LOC119897340	6.305428	164	5.891076	158	41.712556	1334	0.850523	27	1.151154	34	1.022456	30	0.000236798	-1.858318562	down	[O]	Posttranslational modification, protein turnover, chaperones	Molecular Function: serine-type endopeptidase activity (GO:0004252);;	K01312|1.2e-122|sdu:111236042|K01312 trypsin [EC:3.4.21.4] | (RefSeq) trypsin-1-like	Neuroactive ligand-receptor interaction (ko04080)	[E]	Amino acid transport and metabolism	Trypsin	Trypsin-1 OS=Salmo salar OX=8030 PE=1 SV=1	E	Amino acid transport and metabolism	hypothetical protein EPR50_G00062180 [Perca flavescens]	biological process: metabolic process (GO:0008152);; molecular function: catalytic activity (GO:0003824)
gene-LOC119913020	LOC119913020	5.891762	225	10.063382	396	5.507008	262	0.413981	19	0.242816	11	0.25256	11	3.76E-19	-3.215046937	down	--	--	Biological Process: response to acid chemical (GO:0001101);; Cellular Component: cellular_component (GO:0005575);; Cellular Component: cell (GO:0005623);; Cellular Component: plasma membrane (GO:0005886);; Biological Process: multicellular organism development (GO:0007275);; Biological Process: nervous system development (GO:0007399);; Biological Process: central nervous system development (GO:00…	K17270|4.0e-71|lco:104937830|K17270 myelin-oligodendrocyte glycoprotein | (RefSeq) myelin-oligodendrocyte glycoprotein-like isoform X1	--	--	--	Immunoglobulin V-set domain	--	S	Function unknown	myelin-oligodendrocyte glycoprotein-like [Morone saxatilis]	biological process: response to stimulus (GO:0050896);; cellular component: cell (GO:0005623);; cellular component: membrane (GO:0016020);; cellular component: cell part (GO:0044464);; biological process: multicellular organismal process (GO:0032501);; biological process: developmental process (GO:0032502);; biological process: single-organism process (GO:0044699);; cellular component: membrane p…
gene-LOC119918172	LOC119918172	23.847866	2108	22.201706	2029	11.339994	1250	6.442579	680	3.759578	372	4.397776	429	7.16E-05	-1.52036048	down	[T]	Signal transduction mechanisms	Biological Process: regulation of peptide secretion (GO:0002791);; Biological Process: negative regulation of peptide secretion (GO:0002792);; Molecular Function: molecular_function (GO:0003674);; Molecular Function: catalytic activity (GO:0003824);; Molecular Function: protein kinase activity (GO:0004672);; Molecular Function: protein serine/threonine kinase activity (GO:0004674);; Molecular Fun…	K08807|4.7e-186|sdu:111225025|K08807 proto-oncogene serine/threonine-protein kinase Pim-3 [EC:2.7.11.1] | (RefSeq) pim3; serine/threonine-protein kinase pim-3	--	[T]	Signal transduction mechanisms	Protein kinase domain	Serine/threonine-protein kinase pim-3 OS=Coturnix japonica OX=93934 GN=PIM3 PE=2 SV=1	T	Signal transduction mechanisms	serine/threonine-protein kinase pim-3 [Parambassis ranga]	biological process: biological regulation (GO:0065007);; molecular function: catalytic activity (GO:0003824);; biological process: metabolic process (GO:0008152);; biological process: cellular process (GO:0009987);; molecular function: binding (GO:0005488);; cellular component: cell (GO:0005623);; cellular component: cell part (GO:0044464);; biological process: cellular component organization or …
gene-nr4a1	nr4a1	12.534041	985	11.598895	942	7.833734	767	1.263848	119	0.670974	59	0.541559	47	6.72E-19	-2.887469297	down	--	--	Molecular Function: steroid hormone receptor activity (GO:0003707);; Molecular Function: RNA polymerase II transcription factor activity, ligand-activated sequence-specific DNA binding (GO:0004879);; Cellular Component: nucleus (GO:0005634);; Molecular Function: zinc ion binding (GO:0008270);; Cellular Component: host cell nucleus (GO:0042025);; Molecular Function: sequence-specific DNA binding (…	K04465|2.6e-296|sdu:111234938|K04465 nuclear receptor subfamily 4 group A member 1 | (RefSeq) nuclear receptor subfamily 4 group A member 1-like	MAPK signaling pathway (ko04010)	[K]	Transcription	Ligand-binding domain of nuclear hormone receptor	Nuclear receptor subfamily 4 group A member 1 OS=Xenopus laevis OX=8355 GN=nr4a1 PE=2 SV=1	K	Transcription	nuclear receptor subfamily 4 group A member 1 [Morone saxatilis]	biological process: cellular process (GO:0009987);; biological process: signaling (GO:0023052);; biological process: single-organism process (GO:0044699);; biological process: response to stimulus (GO:0050896);; biological process: biological regulation (GO:0065007);; molecular function: signal transducer activity (GO:0004871);; molecular function: molecular transducer activity (GO:0060089);; mol…
gene-plekhn1	plekhn1	4.489594	386	4.629022	411	4.253996	455	2.578235	264	1.385529	133	1.475343	141	0.005694947	-1.042837883	down	--	--	Biological Process: positive regulation of apoptotic process (GO:0043065);; Molecular Function: cardiolipin binding (GO:1901612);;	K23628|2.1e-21|egz:104133395|K23628 tubulin--tyrosine ligase like protein 10 | (RefSeq) TTLL10; inactive polyglycylase TTLL10	--	--	--	PH domain	--	T	Signal transduction mechanisms	pleckstrin homology domain-containing family N member 1 [Perca flavescens]	biological process: biological regulation (GO:0065007);; molecular function: binding (GO:0005488)
gene-LOC119910151	LOC119910151	76.862656	12039	66.574806	10779	20.444433	3992	8.996533	1681	3.182312	558	4.740409	820	6.76E-07	-2.15129412	down	--	--	Biological Process: activation of MAPK activity (GO:0000187);; Biological Process: response to reactive oxygen species (GO:0000302);; Biological Process: skeletal system development (GO:0001501);; Biological Process: angiogenesis (GO:0001525);; Biological Process: blood vessel development (GO:0001568);; Biological Process: response to hypoxia (GO:0001666);; Molecular Function: phosphatidylserine …
re development (GO:1901342);; Biological Process: negative regulation of vasculature development (GO:1901343);; Biological Process: organonitrogen compound metabolic process (GO:1901564);; Biological Process: response to ketone (GO:1901654);; Molecular Function: sulfur compound binding (GO:1901681);; Biological Process: response to nitrogen compound (GO:1901698);; Biological Process: cellular res…	K16857|0.0e+00|lcf:108892515|K16857 thrombospondin 1 | (RefSeq) LOW QUALITY PROTEIN: thrombospondin-1-like	p53 signaling pathway (ko04115);; Phagosome (ko04145);; TGF-beta signaling pathway (ko04350);; Focal adhesion (ko04510);; ECM-receptor interaction (ko04512)	--	--	Thrombospondin C-terminal region	Thrombospondin-1 OS=Xenopus laevis OX=8355 GN=thbs1 PE=2 SV=1	T	Signal transduction mechanisms	thrombospondin-1-like [Epinephelus lanceolatus]	biological process: biological regulation (GO:0065007);; biological process: response to stimulus (GO:0050896);; biological process: multicellular organismal process (GO:0032501);; biological process: developmental process (GO:0032502);; biological process: single-organism process (GO:0044699);; molecular function: binding (GO:0005488);; biological process: immune system process (GO:0002376);; bi…
gene-dennd4a	dennd4a	1.943848	407	1.950977	419	1.251957	327	0.598624	150	0.426804	100	0.387594	90	4.12E-05	-1.461203221	down	--	--	Molecular Function: molecular_function (GO:0003674);; Molecular Function: nucleic acid binding (GO:0003676);; Molecular Function: DNA binding (GO:0003677);; Molecular Function: guanyl-nucleotide exchange factor activity (GO:0005085);; Molecular Function: Ras guanyl-nucleotide exchange factor activity (GO:0005088);; Molecular Function: binding (GO:0005488);; Molecular Function: protein binding (GO…	K20163|0.0e+00|lcf:108886304|K20163 DENN domain-containing protein 4 | (RefSeq) dennd4a; LOW QUALITY PROTEIN: C-myc promoter-binding protein	--	[T]	Signal transduction mechanisms	DENN (AEX-3) domain	--	T	Signal transduction mechanisms	PREDICTED: LOW QUALITY PROTEIN: C-myc promoter-binding protein [Lates calcarifer]	molecular function: binding (GO:0005488);; biological process: biological regulation (GO:0065007);; molecular function: molecular function regulator (GO:0098772);; cellular component: cell (GO:0005623);; cellular component: cell part (GO:0044464)
gene-dusp8a	dusp8a	14.643278	2058	9.93601	1443	12.790703	2240	4.82236	809	2.871938	452	2.651371	412	1.67E-06	-1.516270354	down	--	--	Molecular Function: protein tyrosine phosphatase activity (GO:0004725);; Molecular Function: MAP kinase tyrosine/serine/threonine phosphatase activity (GO:0017017);;	K04459|0.0e+00|lcf:108875362|K04459 dual specificity MAP kinase phosphatase [EC:3.1.3.16 3.1.3.48] | (RefSeq) dusp8; dual specificity protein phosphatase 8 isoform X1	MAPK signaling pathway (ko04010)	[V]	Defense mechanisms	Dual specificity phosphatase, catalytic domain	Dual specificity protein phosphatase 4 OS=Gallus gallus OX=9031 GN=DUSP4 PE=2 SV=1	V	Defense mechanisms	dual specificity protein phosphatase 8a [Morone saxatilis]	biological process: metabolic process (GO:0008152);; biological process: cellular process (GO:0009987);; molecular function: catalytic activity (GO:0003824);; biological process: biological regulation (GO:0065007)
gene-LOC119901857	LOC119901857	93.490608	5696	104.785927	6599	47.557747	3612	29.71806	2160	18.546249	1265	21.612318	1453	0.000452549	-1.391462297	down	--	--	Biological Process: negative regulation of transcription from RNA polymerase II promoter (GO:0000122);; Cellular Component: nuclear chromosome (GO:0000228);; Biological Process: response to reactive oxygen species (GO:0000302);; Cellular Component: chromatin (GO:0000785);; Cellular Component: nuclear chromatin (GO:0000790);; Biological Process: cell morphogenesis (GO:0000902);; Molecular Function…	K17845|1.0e-187|lco:104931429|K17845 krueppel-like factor 2 | (RefSeq) Krueppel-like factor 2	FoxO signaling pathway (ko04068);; Apelin signaling pathway (ko04371)	[R]	General function prediction only	Zinc finger, C2H2 type	Transcription factor Sp8 OS=Gallus gallus OX=9031 GN=SP8 PE=2 SV=1	K	Transcription	Krueppel-like factor 2 [Morone saxatilis]	biological process: biological regulation (GO:0065007);; cellular component: cell (GO:0005623);; cellular component: organelle (GO:0043226);; cellular component: organelle part (GO:0044422);; cellular component: cell part (GO:0044464);; biological process: response to stimulus (GO:0050896);; cellular component: membrane-enclosed lumen (GO:0031974);; biological process: cellular process (GO:000998…
gene-sult6b1	sult6b1	34.262012	1485	37.513916	1681	53.918926	2913	22.156834	1146	10.94693	531	12.11848	580	0.004264522	-1.164922746	down	--	--	Molecular Function: sulfotransferase activity (GO:0008146);; Biological Process: cellular response to xenobiotic stimulus (GO:0071466);;	K22523|2.7e-148|sdu:111224239|K22523 sulfotransferase 6B1 [EC:2.8.2.-] | (RefSeq) sult6b1; sulfotransferase 6B1	--	[R]	General function prediction only	Sulfotransferase domain	Sulfotransferase 6B1 OS=Danio rerio OX=7955 GN=sult6b1 PE=1 SV=1	S	Function unknown	sulfotransferase 6B1 [Seriola dumerili]	molecular function: catalytic activity (GO:0003824);; biological process: cellular process (GO:0009987);; biological process: response to stimulus (GO:0050896)
gene-si:ch211-195b13.1	si:ch211-195b13.1	33.377807	3154	26.596608	2597	16.41579	1934	10.334239	1167	4.397953	467	4.711349	494	0.000395483	-1.486157869	down	[T]	Signal transduction mechanisms	Molecular Function: protein serine/threonine kinase activity (GO:0004674);; Molecular Function: ATP binding (GO:0005524);; Molecular Function: phosphatidylinositol binding (GO:0035091);;	K13302|1.8e-227|mze:101469250|K13302 serum/glucocorticoid-regulated kinase 1 [EC:2.7.11.1] | (RefSeq) serine/threonine-protein kinase Sgk1 isoform X1	FoxO signaling pathway (ko04068);; mTOR signaling pathway (ko04150)	[RT]	General function prediction only;; Signal transduction mechanisms	Protein kinase domain	Serine/threonine-protein kinase Sgk1 OS=Gallus gallus OX=9031 GN=SGK1 PE=2 SV=1	T	Signal transduction mechanisms	serine/threonine-protein kinase Sgk1-like isoform X2 [Astatotilapia calliptera]	biological process: metabolic process (GO:0008152);; biological process: cellular process (GO:0009987);; molecular function: catalytic activity (GO:0003824);; molecular function: binding (GO:0005488)
gene-si:dkey-79d12.5	si:dkey-79d12.5	38.955208	2367	31.651636	1988	15.205935	1152	10.080603	731	7.184508	489	7.965763	534	0.003840436	-1.300510286	down	--	--	--	K14443|4.4e-132|lcf:108890421|K14443 protein Tob/BTG | (RefSeq) protein BTG4-like	RNA degradation (ko03018)	[TR]	Signal transduction mechanisms;; General function prediction only	BTG family	Maternal B9.15 protein OS=Xenopus laevis OX=8355 PE=2 SV=1	T	Signal transduction mechanisms	PREDICTED: protein BTG4-like [Lates calcarifer]	--
gene-LOC119893379	LOC119893379	3.995673	170	4.089932	179	50.30595	2656	0.522254	27	0.960602	46	1.237281	58	0.005841138	-1.543030463	down	[M]	Cell wall/membrane/envelope biogenesis	Molecular Function: metallocarboxypeptidase activity (GO:0004181);; Molecular Function: zinc ion binding (GO:0008270);;	K01298|2.2e-220|sdu:111229836|K01298 carboxypeptidase A2 [EC:3.4.17.15] | (RefSeq) carboxypeptidase A2-like isoform X1	--	[S]	Function unknown	Zinc carboxypeptidase	Carboxypeptidase O OS=Danio rerio OX=7955 GN=cpo PE=1 SV=1	O	Posttranslational modification, protein turnover, chaperones	carboxypeptidase A4 [Morone saxatilis]	biological process: metabolic process (GO:0008152);; molecular function: catalytic activity (GO:0003824);; molecular function: binding (GO:0005488)
gene-LOC119908962	LOC119908962	67.087975	3173	93.496368	4570	16.110317	950	8.553617	483	3.983601	211	5.074705	265	1.44E-05	-2.016761417	down	--	--	Biological Process: negative regulation of transcription from RNA polymerase II promoter (GO:0000122);; Molecular Function: transcription regulatory region sequence-specific DNA binding (GO:0000976);; Molecular Function: RNA polymerase II regulatory region sequence-specific DNA binding (GO:0000977);; Molecular Function: RNA polymerase II core promoter proximal region sequence-specific DNA binding…	K09033|3.4e-68|lco:104922422|K09033 jun dimerization protein 2 | (RefSeq) jun dimerization protein 2	--	[K]	Transcription	bZIP transcription factor	Jun dimerization protein 2 OS=Danio rerio OX=7955 GN=jdp2 PE=2 SV=1	K	Transcription	jun dimerization protein 2-like [Sparus aurata]	biological process: biological regulation (GO:0065007);; molecular function: binding (GO:0005488);; molecular function: nucleic acid binding transcription factor activity (GO:0001071);; cellular component: cell (GO:0005623);; cellular component: cell part (GO:0044464);; cellular component: organelle (GO:0043226)
Micropterus_salmoides_newGene_3408	--	0.773427	54	4.413069	311	0.717572	60	0.153535	13	0.054289	5	0.10573	9	0.001151644	-1.72014962	down	--	--	Molecular Function: cation:chloride symporter activity (GO:0015377);; Cellular Component: integral component of membrane (GO:0016021);;	K10951|7.6e-116|sdu:111238553|K10951 solute carrier family 12 (sodium/potassium/chloride transporter), member 2 | (RefSeq) solute carrier family 12 member 2-like	--	[P]	Inorganic ion transport and metabolism	Solute carrier family 12	Solute carrier family 12 member 2 OS=Squalus acanthias OX=7797 GN=SLC12A2 PE=1 SV=1	P	Inorganic ion transport and metabolism	solute carrier family 12 member 2-like [Labrus bergylta]	biological process: localization (GO:0051179);; molecular function: transporter activity (GO:0005215);; cellular component: membrane (GO:0016020);; cellular component: membrane part (GO:0044425)
gene-LOC119907002	LOC119907002	2.808651	106	3.09742	119	2.066792	99	0.737147	34	0.687656	29	0.543789	24	0.001651652	-1.416558671	down	--	--	Molecular Function: phosphatidylinositol binding (GO:0035091);;	K17924|8.8e-81|sdu:111223382|K17924 sorting nexin-10/11 | (RefSeq) sorting nexin-10A-like isoform X1	--	[U]	Intracellular trafficking, secretion, and vesicular transport	PX domain	Sorting nexin-10A OS=Danio rerio OX=7955 GN=snx10a PE=1 SV=1	U	Intracellular trafficking, secretion, and vesicular transport	sorting nexin-10B-like [Morone saxatilis]	molecular function: binding (GO:0005488)
gene-LOC119888537	LOC119888537	17.442896	1150	21.630489	1474	6.68619	550	3.681523	290	2.792741	207	3.864705	282	0.002035531	-1.469966234	down	--	--	Cellular Component: integral component of membrane (GO:0016021);; Biological Process: retina development in camera-type eye (GO:0060041);; Biological Process: sensory epithelium regeneration (GO:0070654);;	K08523|6.0e-98|sdu:111226747|K08523 heparin-binding EGF-like growth factor | (RefSeq) proheparin-binding EGF-like growth factor isoform X1	ErbB signaling pathway (ko04012);; GnRH signaling pathway (ko04912)	--	--	--	Proheparin-binding EGF-like growth factor OS=Gallus gallus OX=9031 GN=HBEGF PE=1 SV=1	T	Signal transduction mechanisms	proheparin-binding EGF-like growth factor [Seriola lalandi dorsalis]	cellular component: membrane (GO:0016020);; cellular component: membrane part (GO:0044425);; biological process: developmental process (GO:0032502);; biological process: growth (GO:0040007);; biological process: single-organism process (GO:0044699);; biological process: response to stimulus (GO:0050896)
Micropterus_salmoides_newGene_1372	--	4.317189	727	8.526516	1485	4.897983	829	1.524515	317	1.348098	263	1.687785	323	0.002646462	-1.336820026	down	--	--	--	--	--	--	--	--	--	--	--	BCLAF1 and THRAP3 family member 3 [Epinephelus lanceolatus]	--
gene-prelid3b	prelid3b	10.94472	925	12.188558	1065	3.335576	352	1.755399	177	1.869067	177	1.141746	107	0.00147427	-1.577521959	down	--	--	Cellular Component: mitochondrial intermembrane space (GO:0005758);;	--	--	[U]	Intracellular trafficking, secretion, and vesicular transport	PRELI-like family	PRELI domain containing protein 3A OS=Xenopus laevis OX=8355 GN=prelid3a PE=2 SV=1	U	Intracellular trafficking, secretion, and vesicular transport	PRELI domain containing protein 3B-like [Seriola dumerili]	cellular component: cell (GO:0005623);; cellular component: membrane-enclosed lumen (GO:0031974);; cellular component: organelle (GO:0043226);; cellular component: organelle part (GO:0044422);; cellular component: cell part (GO:0044464)
gene-LOC119888493	LOC119888493	0.581315	69	0.583451	71	0.465322	69	0.096784	14	0.075341	10	0.107325	14	0.000344467	-1.667624949	down	--	--	Biological Process: regulation of cyclin-dependent protein serine/threonine kinase activity (GO:0000079);; Biological Process: microtubule cytoskeleton organization (GO:0000226);; Biological Process: mitotic cell cycle (GO:0000278);; Biological Process: embryonic axis specification (GO:0000578);; Biological Process: in utero embryonic development (GO:0001701);; Biological Process: embryonic epith…	K16724|0.0e+00|sdu:111236207|K16724 SCL-interrupting locus protein | (RefSeq) stil; SCL-interrupting locus protein	--	--	--	SCL-interrupting locus protein N-terminus	SCL-interrupting locus protein homolog OS=Danio rerio OX=7955 GN=stil PE=1 SV=2	S	Function unknown	SCL-interrupting locus protein homolog isoform X2 [Epinephelus lanceolatus]	biological process: biological regulation (GO:0065007);; biological process: cellular process (GO:0009987);; biological process: cellular component organization or biogenesis (GO:0071840);; biological process: single-organism process (GO:0044699);; biological process: multicellular organismal process (GO:0032501);; biological process: developmental process (GO:0032502);; cellular component: cell …
gene-LOC119910748	LOC119910748	7.135095	274	22.336196	896	4.389178	213	1.765139	84	1.96292	85	1.566427	69	0.006436734	-1.511497125	down	[P]	Inorganic ion transport and metabolism	Molecular Function: gamma-glutamylcyclotransferase activity (GO:0003839);; Biological Process: glutathione catabolic process (GO:0006751);;	K07232|2.0e-98|sdu:111225503|K07232 glutathione-specific gamma-glutamylcyclotransferase [EC:4.3.2.7] | (RefSeq) glutathione-specific gamma-glutamylcyclotransferase 1-like	Glutathione metabolism (ko00480)	[P]	Inorganic ion transport and metabolism	ChaC-like protein	Glutathione-specific gamma-glutamylcyclotransferase 1 OS=Danio rerio OX=7955 GN=chac1 PE=3 SV=1	P	Inorganic ion transport and metabolism	glutathione-specific gamma-glutamylcyclotransferase 1-like isoform X1 [Morone saxatilis]	molecular function: catalytic activity (GO:0003824);; biological process: metabolic process (GO:0008152);; biological process: cellular process (GO:0009987)
gene-LOC119914844	LOC119914844	3.284172	140	4.719309	208	3.475117	185	0.681468	35	0.609396	30	1.016686	48	6.18E-05	-1.655162452	down	--	--	Molecular Function: ATP binding (GO:0005524);;	K23718|3.9e-17|lco:104938823|K23718 protein SON | (RefSeq) protein SON isoform X1	--	--	--	--	--	--	--	protein NLRC3-like [Sparus aurata]	molecular function: binding (GO:0005488)
gene-si:dkey-242g16.2	si:dkey-242g16.2	2.638373	107	3.076561	128	1.280064	65	0.426372	21	0.458189	21	0.529156	24	0.008027037	-1.428131017	down	--	--	Molecular Function: protein binding (GO:0005515);;	K07189|7.5e-142|sdu:111237504|K07189 protein phosphatase 1 regulatory subunit 3A/B/C/D/E | (RefSeq) protein phosphatase 1 regulatory subunit 3C-B-like	Insulin signaling pathway (ko04910)	[OT]	Posttranslational modification, protein turnover, chaperones;; Signal transduction mechanisms	Carbohydrate/starch-binding module (family 21)	Protein phosphatase 1 regulatory subunit 3C-B OS=Danio rerio OX=7955 GN=ppp1r3cb PE=2 SV=1	--	--	protein phosphatase 1 regulatory subunit 3C-B [Morone saxatilis]	molecular function: binding (GO:0005488)
gene-LOC119912422	LOC119912422	94.799416	3587	135.751877	5309	211.58403	9979	465.112	20988	253.758194	10746	481.34549	20095	0.009862088	1.224515587	up	--	--	Biological Process: immune response (GO:0006955);; Cellular Component: integral component of membrane (GO:0016021);; Biological Process: antigen processing and presentation (GO:0019882);; Cellular Component: MHC class II protein complex (GO:0042613);;	K06752|2.2e-119|lcf:108882209|K06752 MHC class II antigen | (RefSeq) H-2 class II histocompatibility antigen, E-S beta chain-like	Phagosome (ko04145);; Cell adhesion molecules (ko04514);; Intestinal immune network for IgA production (ko04672);; Herpes simplex virus 1 infection (ko05168)	--	--	Immunoglobulin C1-set domain	--	S	Function unknown	MHC class II antigen [Epinephelus coioides]	biological process: immune system process (GO:0002376);; biological process: response to stimulus (GO:0050896);; cellular component: membrane (GO:0016020);; cellular component: membrane part (GO:0044425);; cellular component: cell (GO:0005623);; cellular component: macromolecular complex (GO:0032991);; cellular component: cell part (GO:0044464)
gene-LOC119895561	LOC119895561	265.160858	19548	323.069763	24618	158.305984	14548	50.968239	4482	11.060061	913	29.875959	2431	1.01E-06	-2.075225788	down	--	--	Biological Process: ameboidal-type cell migration (GO:0001667);; Biological Process: embryonic development via the syncytial blastoderm (GO:0001700);; Molecular Function: nucleic acid binding (GO:0003676);; Biological Process: movement of cell or subcellular component (GO:0006928);; Biological Process: cell communication (GO:0007154);; Biological Process: cell-cell signaling (GO:0007267);; Biolog…	K09203|1.8e-149|lco:104926130|K09203 early growth response protein 1 | (RefSeq) early growth response protein 1	Apelin signaling pathway (ko04371);; GnRH signaling pathway (ko04912)	[R]	General function prediction only	Zinc-finger double domain	Early growth response protein 1 OS=Danio rerio OX=7955 GN=egr1 PE=2 SV=2	K	Transcription	early growth response protein 1-like [Sparus aurata]	biological process: cellular process (GO:0009987);; biological process: locomotion (GO:0040011);; biological process: single-organism process (GO:0044699);; biological process: localization (GO:0051179);; biological process: multicellular organismal process (GO:0032501);; biological process: developmental process (GO:0032502);; molecular function: binding (GO:0005488);; biological process: signal…
gene-LOC119918306	LOC119918306	12.723299	1337	13.446712	1461	8.216872	1077	5.238429	657	2.803609	330	3.29232	382	0.000527913	-1.275216582	down	--	--	Cellular Component: integral component of membrane (GO:0016021);;	K14207|1.1e-221|lco:104922650|K14207 solute carrier family 38 (sodium-coupled neutral amino acid transporter), member 2 | (RefSeq) sodium-coupled neutral amino acid transporter 2	--	[E]	Amino acid transport and metabolism	Transmembrane amino acid transporter protein	Sodium-coupled neutral amino acid transporter 2 OS=Danio rerio OX=7955 GN=slc38a2 PE=3 SV=1	E	Amino acid transport and metabolism	sodium-coupled neutral amino acid transporter 2 [Epinephelus lanceolatus]	cellular component: membrane (GO:0016020);; cellular component: membrane part (GO:0044425)
gene-ier2b	ier2b	245.502014	10688	348.279846	15672	74.27832	4031	46.385845	2409	15.308535	746	27.69138	1331	0.000138058	-1.815155631	down	--	--	Molecular Function: transcription regulatory region sequence-specific DNA binding (GO:0000976);; Molecular Function: RNA polymerase II regulatory region sequence-specific DNA binding (GO:0000977);; Molecular Function: RNA polymerase II transcription factor activity, sequence-specific DNA binding (GO:0000981);; Molecular Function: RNA polymerase II regulatory region DNA binding (GO:0001012);; Mole…	--	--	--	--	Immediate early response protein (IER)	Immediate early response gene 2 protein OS=Danio rerio OX=7955 GN=ier2 PE=1 SV=1	S	Function unknown	immediate early response 2b [Epinephelus lanceolatus]	molecular function: binding (GO:0005488);; biological process: biological regulation (GO:0065007);; molecular function: nucleic acid binding transcription factor activity (GO:0001071);; cellular component: cell (GO:0005623);; cellular component: cell part (GO:0044464);; cellular component: organelle (GO:0043226);; cellular component: organelle part (GO:0044422);; biological process: metabolic pro…
Micropterus_salmoides_newGene_516	--	0.397817	68	0.628046	111	0.598063	127	0.046087	10	0	0	0.042128	8	2.13E-05	-2.051870804	down	--	--	--	K08826|1.5e-38|csem:103396428|K08826 homeodomain interacting protein kinase [EC:2.7.11.1] | (RefSeq) homeodomain-interacting protein kinase 2-like	Cellular senescence (ko04218)	--	--	GDSL-like Lipase/Acylhydrolase family	--	--	--	uncharacterized protein LOC112139390 [Oryzias melastigma]	--
gene-ptgfr	ptgfr	2.361024	164	1.51982	109	1.1701	101	0.570342	48	0.12532	10	0.261817	20	0.008314382	-1.459408524	down	--	--	Biological Process: reproduction (GO:0000003);; Biological Process: response to acid chemical (GO:0001101);; Biological Process: response to molecule of bacterial origin (GO:0002237);; Molecular Function: molecular_function (GO:0003674);; Molecular Function: transmembrane signaling receptor activity (GO:0004888);; Molecular Function: G-protein coupled receptor activity (GO:0004930);; Molecular Fu…	K04262|1.3e-176|lco:104918494|K04262 prostaglandin F receptor | (RefSeq) prostaglandin F2-alpha receptor	Calcium signaling pathway (ko04020);; Neuroactive ligand-receptor interaction (ko04080)	[R]	General function prediction only	7 transmembrane receptor (rhodopsin family)	--	T	Signal transduction mechanisms	prostaglandin F2-alpha receptor [Morone saxatilis]	biological process: reproduction (GO:0000003);; biological process: response to stimulus (GO:0050896);; biological process: cellular process (GO:0009987);; biological process: signaling (GO:0023052);; biological process: single-organism process (GO:0044699);; biological process: biological regulation (GO:0065007);; molecular function: signal transducer activity (GO:0004871);; molecular function: …
gene-jun	jun	147.84445	8973	234.584385	14715	106.874218	8081	31.683478	2294	13.041843	887	14.143649	948	4.74E-10	-2.290066957	down	--	--	Biological Process: reproduction (GO:0000003);; Biological Process: negative regulation of transcription from RNA polymerase II promoter (GO:0000122);; Biological Process: MAPK cascade (GO:0000165);; Cellular Component: nuclear chromosome (GO:0000228);; Biological Process: response to reactive oxygen species (GO:0000302);; Cellular Component: chromatin (GO:0000785);; Cellular Component: nuclear c…
:0050794);; Biological Process: synapse organization (GO:0050808);; Biological Process: nervous system process (GO:0050877);; Biological Process: cognition (GO:0050890);; Biological Process: response to stimulus (GO:0050896);; Biological Process: regulation of DNA metabolic process (GO:0051052);; Biological Process: positive regulation of DNA metabolic process (GO:0051054);; Biological Process: r…	K04448|8.6e-172|lco:104926010|K04448 transcription factor AP-1 | (RefSeq) transcription factor AP-1	MAPK signaling pathway (ko04010);; ErbB signaling pathway (ko04012);; Mitophagy - animal (ko04137);; Apoptosis (ko04210);; Wnt signaling pathway (ko04310);; Focal adhesion (ko04510);; Tight junction (ko04530);; Toll-like receptor signaling pathway (ko04620);; NOD-like receptor signaling pathway (ko04621);; C-type lectin receptor signaling pathway (ko04625);; GnRH signaling pathway (ko04912);; Sal…	[K]	Transcription	Jun-like transcription factor	Transcription factor AP-1 OS=Serinus canaria OX=9135 GN=JUN PE=2 SV=1	K	Transcription	transcription factor AP-1 [Larimichthys crocea]	biological process: reproduction (GO:0000003);; biological process: biological regulation (GO:0065007);; biological process: metabolic process (GO:0008152);; biological process: cellular process (GO:0009987);; biological process: signaling (GO:0023052);; biological process: single-organism process (GO:0044699);; biological process: response to stimulus (GO:0050896);; cellular component: cell (GO:…
gene-klf4	klf4	38.329174	2306	64.182381	3990	27.191177	2039	3.956576	284	2.371614	160	3.318221	221	5.40E-18	-2.87836663	down	--	--	Biological Process: negative regulation of transcription from RNA polymerase II promoter (GO:0000122);; Cellular Component: nuclear chromosome (GO:0000228);; Cellular Component: chromatin (GO:0000785);; Cellular Component: nuclear chromatin (GO:0000790);; Cellular Component: euchromatin (GO:0000791);; Molecular Function: transcription regulatory region sequence-specific DNA binding (GO:0000976);;…
region DNA binding (GO:2000677);; Biological Process: positive regulation of transcription regulatory region DNA binding (GO:2000679);; Biological Process: regulation of RNA biosynthetic process (GO:2001141);;	K17846|1.7e-183|lco:104928402|K17846 krueppel-like factor 4 | (RefSeq) klf4; Krueppel-like factor 4 isoform X1	--	[R]	General function prediction only	Zinc finger, C2H2 type	Transcription factor Sp8 OS=Xenopus laevis OX=8355 GN=sp8 PE=2 SV=1	K	Transcription	Krueppel-like factor 4 isoform X1 [Larimichthys crocea]	biological process: biological regulation (GO:0065007);; cellular component: cell (GO:0005623);; cellular component: organelle (GO:0043226);; cellular component: organelle part (GO:0044422);; cellular component: cell part (GO:0044464);; cellular component: membrane-enclosed lumen (GO:0031974);; molecular function: binding (GO:0005488);; molecular function: nucleic acid binding transcription facto…
gene-LOC119899726	LOC119899726	17.354609	1597	17.487144	1664	12.737833	1461	6.948042	763	5.032869	519	5.84602	594	7.54E-05	-1.163267003	down	--	--	Biological Process: negative regulation of transcription from RNA polymerase II promoter (GO:0000122);; Cellular Component: ubiquitin ligase complex (GO:0000151);; Cellular Component: nuclear ubiquitin ligase complex (GO:0000152);; Molecular Function: regulatory region nucleic acid binding (GO:0001067);; Molecular Function: molecular_function (GO:0003674);; Molecular Function: nucleic acid bindin…	K11452|7.1e-254|lco:104921555|K11452 chromobox protein 4 [EC:2.3.2.-] | (RefSeq) cbx4; E3 SUMO-protein ligase CBX4	--	[B]	Chromatin structure and dynamics	Chromo (CHRromatin Organisation MOdifier) domain	--	B	Chromatin structure and dynamics	E3 SUMO-protein ligase CBX4 [Sparus aurata]	biological process: biological regulation (GO:0065007);; cellular component: cell (GO:0005623);; cellular component: macromolecular complex (GO:0032991);; cellular component: cell part (GO:0044464);; cellular component: organelle (GO:0043226);; cellular component: organelle part (GO:0044422);; molecular function: binding (GO:0005488);; molecular function: transcription factor activity, protein bi…
gene-dusp2	dusp2	7.074815	394	5.710186	329	3.227268	225	1.527882	102	0.981655	62	0.875785	54	7.54E-05	-1.634929548	down	[T]	Signal transduction mechanisms	Molecular Function: protein tyrosine phosphatase activity (GO:0004725);; Molecular Function: MAP kinase tyrosine/serine/threonine phosphatase activity (GO:0017017);;	K04459|1.5e-165|lcf:108881939|K04459 dual specificity MAP kinase phosphatase [EC:3.1.3.16 3.1.3.48] | (RefSeq) LOW QUALITY PROTEIN: dual specificity protein phosphatase 2-like	MAPK signaling pathway (ko04010)	[V]	Defense mechanisms	Dual specificity phosphatase, catalytic domain	Dual specificity protein phosphatase 4 OS=Gallus gallus OX=9031 GN=DUSP4 PE=2 SV=1	V	Defense mechanisms	dual specificity protein phosphatase 2 [Epinephelus lanceolatus]	biological process: metabolic process (GO:0008152);; biological process: cellular process (GO:0009987);; molecular function: catalytic activity (GO:0003824);; biological process: biological regulation (GO:0065007)
gene-gadd45aa	gadd45aa	36.289833	1480	52.412182	2209	28.550457	1451	14.965885	728	9.579075	438	15.140789	682	0.003239477	-1.202614331	down	--	--	Cellular Component: nucleus (GO:0005634);; Biological Process: paraxial mesoderm development (GO:0048339);; Biological Process: regulation of cell cycle (GO:0051726);;	K04402|1.5e-84|tru:101074436|K04402 growth arrest and DNA-damage-inducible protein | (RefSeq) gadd45a; growth arrest and DNA damage-inducible protein GADD45 alpha	MAPK signaling pathway (ko04010);; FoxO signaling pathway (ko04068);; Cell cycle (ko04110);; p53 signaling pathway (ko04115);; Apoptosis (ko04210);; Cellular senescence (ko04218)	--	--	Ribosomal protein L7Ae/L30e/S12e/Gadd45 family	--	S	Function unknown	growth arrest and DNA-damage-inducible, alpha, a isoform X1 [Notolabrus celidotus]	cellular component: cell (GO:0005623);; cellular component: organelle (GO:0043226);; cellular component: cell part (GO:0044464);; biological process: multicellular organismal process (GO:0032501);; biological process: developmental process (GO:0032502);; biological process: single-organism process (GO:0044699);; biological process: biological regulation (GO:0065007)
Micropterus_salmoides_newGene_1655	--	1.248968	68	1.621957	89	1.267521	91	0.428379	30	0.26786	18	0.173809	12	0.004578534	-1.431658523	down	--	--	--	--	--	--	--	--	--	--	--	--	--
gene-rrad	rrad	65.767868	3481	48.208179	2638	14.842937	980	12.007356	758	4.958978	294	4.298676	252	0.001441214	-1.622282847	down	--	--	Molecular Function: GTPase activity (GO:0003924);; Molecular Function: calcium channel regulator activity (GO:0005246);; Molecular Function: GTP binding (GO:0005525);; Biological Process: signal transduction (GO:0007165);; Cellular Component: membrane (GO:0016020);; Biological Process: negative regulation of high voltage-gated calcium channel activity (GO:1901842);;	K07845|1.7e-166|lcf:108887649|K07845 Ras-related associated with diabetes | (RefSeq) rrad; GTP-binding protein RAD	--	[R]	General function prediction only	Ras family	Ras-related protein O-RAL OS=Diplobatis ommata OX=1870830 PE=2 SV=1	S	Function unknown	PREDICTED: GTP-binding protein RAD [Stegastes partitus]	molecular function: catalytic activity (GO:0003824);; biological process: biological regulation (GO:0065007);; molecular function: molecular function regulator (GO:0098772);; molecular function: binding (GO:0005488);; biological process: cellular process (GO:0009987);; cellular component: membrane (GO:0016020)
gene-si:ch73-335l21.4	si:ch73-335l21.4	113.708458	4091	226.366882	8417	33.703037	1512	6.963862	299	0.883042	36	2.413501	96	2.46E-07	-2.372167487	down	--	--	--	--	--	--	--	Ring finger domain	--	O	Posttranslational modification, protein turnover, chaperones	RING finger protein 227 [Morone saxatilis]	--
gene-LOC119891556	LOC119891556	3.126065	197	2.608294	170	41.404926	3251	0.276908	21	0.398307	29	0.580557	41	0.001697692	-1.655324923	down	[I]	Lipid transport and metabolism	Biological Process: retinoid metabolic process (GO:0001523);; Biological Process: system process (GO:0003008);; Molecular Function: molecular_function (GO:0003674);; Molecular Function: catalytic activity (GO:0003824);; Molecular Function: phospholipase activity (GO:0004620);; Molecular Function: lysophospholipase activity (GO:0004622);; Molecular Function: sterol esterase activity (GO:0004771);;…	K12298|1.6e-285|lcf:108894810|K12298 bile salt-stimulated lipase [EC:3.1.1.3 3.1.1.13] | (RefSeq) bile salt-activated lipase-like	Steroid biosynthesis (ko00100);; Glycerolipid metabolism (ko00561)	[R]	General function prediction only	Carboxylesterase family	Acetylcholinesterase OS=Bungarus fasciatus OX=8613 GN=ACHE PE=1 SV=2	I	Lipid transport and metabolism	bile salt-activated lipase-like [Morone saxatilis]	biological process: metabolic process (GO:0008152);; biological process: cellular process (GO:0009987);; biological process: single-organism process (GO:0044699);; biological process: multicellular organismal process (GO:0032501);; molecular function: catalytic activity (GO:0003824);; molecular function: binding (GO:0005488);; cellular component: extracellular region (GO:0005576);; cellular compo…
gene-LOC119914078	LOC119914078	1.475997	75	2.86504	151	0.928726	59	0	0	0	0	0	0	5.31E-10	-2.717586518	down	--	--	Molecular Function: scavenger receptor activity (GO:0005044);; Cellular Component: membrane (GO:0016020);;	K06545|4.7e-100|lco:109139584|K06545 CD163 antigen | (RefSeq) LOW QUALITY PROTEIN: scavenger receptor cysteine-rich type 1 protein M130-like	--	--	--	Scavenger receptor cysteine-rich domain	--	T	Signal transduction mechanisms	scavenger receptor cysteine-rich type 1 protein M130-like [Etheostoma spectabile]	biological process: localization (GO:0051179);; molecular function: molecular transducer activity (GO:0060089);; cellular component: membrane (GO:0016020)
gene-LOC119894241	LOC119894241	11.280318	323	6.107748	181	72.360457	2572	0.794241	28	1.601819	52	1.063739	35	0.000308585	-1.834608353	down	[G]	Carbohydrate transport and metabolism	Molecular Function: metalloendopeptidase activity (GO:0004222);; Molecular Function: zinc ion binding (GO:0008270);;	K18543|5.6e-57|mze:101472880|K18543 choriolysin H [EC:3.4.24.67] | (RefSeq) high choriolytic enzyme 1-like	--	[O]	Posttranslational modification, protein turnover, chaperones	Astacin (Peptidase family M12A)	High choriolytic enzyme 1 OS=Oryzias latipes OX=8090 GN=hcea PE=1 SV=1	O	Posttranslational modification, protein turnover, chaperones	high choriolytic enzyme 2-like [Etheostoma cragini]	biological process: metabolic process (GO:0008152);; molecular function: catalytic activity (GO:0003824);; molecular function: binding (GO:0005488)
gene-LOC119914863	LOC119914863	1.287533	47	4.76813	177	1.627383	73	0.263007	12	0.218562	9	0.008108	1	0.003372701	-1.619159302	down	--	--	Molecular Function: GTP binding (GO:0005525);;	K12800|1.7e-75|mze:106675363|K12800 NACHT, LRR and PYD domains-containing protein 3 | (RefSeq) NACHT, LRR and PYD domains-containing protein 12	Necroptosis (ko04217);; NOD-like receptor signaling pathway (ko04621);; C-type lectin receptor signaling pathway (ko04625);; Salmonella infection (ko05132)	--	--	--	--	S	Function unknown	uncharacterized protein LOC114570783 [Perca flavescens]	molecular function: binding (GO:0005488)
gene-LOC119909126	LOC119909126	1031.889526	54794	1096.640747	60191	529.695496	35062	118.687149	7517	17.627604	1048	23.466557	1375	2.46E-07	-2.329397166	down	--	--	Molecular Function: double-stranded DNA binding (GO:0003690);; Molecular Function: transcription factor activity, sequence-specific DNA binding (GO:0003700);; Cellular Component: transcription factor complex (GO:0005667);; Biological Process: regulation of transcription from RNA polymerase II promoter (GO:0006357);; Biological Process: multicellular organismal response to stress (GO:0033555);;	K04379|7.9e-169|lcf:108895611|K04379 proto-oncogene protein c-fos | (RefSeq) proto-oncogene c-Fos-like	MAPK signaling pathway (ko04010);; Apoptosis (ko04210);; Toll-like receptor signaling pathway (ko04620);; Salmonella infection (ko05132)	[K]	Transcription	bZIP transcription factor	Proto-oncogene c-Fos OS=Takifugu rubripes OX=31033 GN=fos PE=3 SV=1	K	Transcription	v-fos FBJ murine osteosarcoma viral oncogene homolog Ab [Morone saxatilis]	molecular function: binding (GO:0005488);; biological process: biological regulation (GO:0065007);; molecular function: nucleic acid binding transcription factor activity (GO:0001071);; cellular component: cell (GO:0005623);; cellular component: macromolecular complex (GO:0032991);; cellular component: cell part (GO:0044464);; biological process: multicellular organismal process (GO:0032501);; bi…
Micropterus_salmoides_newGene_735	--	13.466217	1121	23.983157	2121	4.703963	492	3.741587	261	1.351768	114	2.455615	206	0.000455949	-1.725576763	down	--	--	--	K22614|3.9e-129|sdu:111236170|K22614 NLR family CARD domain-containing protein 3 | (RefSeq) protein NLRC3-like	--	--	--	NACHT domain	--	O	Posttranslational modification, protein turnover, chaperones	NLR family CARD domain-containing protein 3 CARD15-like protein Caterpiller protein 16.2 [Channa argus]	--
gene-LOC119900566	LOC119900566	283.615326	15795	167.23793	9627	241.779877	16784	530.096619	35209	810.158142	50498	460.575867	28303	0.008314382	1.229668658	up	[PR]	Inorganic ion transport and metabolism;; General function prediction only	Molecular Function: phosphatase activity (GO:0016791);;	K01077|7.5e-263|sdu:111226801|K01077 alkaline phosphatase [EC:3.1.3.1] | (RefSeq) alkaline phosphatase-like	Thiamine metabolism (ko00730);; Folate biosynthesis (ko00790)	[P]	Inorganic ion transport and metabolism	Alkaline phosphatase	Alkaline phosphatase OS=Gadus morhua OX=8049 PE=1 SV=1	P	Inorganic ion transport and metabolism	alkaline phosphatase-like [Seriola dumerili]	molecular function: catalytic activity (GO:0003824)
gene-LOC119899642	LOC119899642	347.637668	19721	397.119774	23282	194.542495	13434	64.619456	4374	17.441427	1098	37.800212	2365	1.94E-07	-2.116410624	down	--	--	Biological Process: lymph vessel development (GO:0001945);; Molecular Function: DNA binding (GO:0003677);; Molecular Function: transcription factor activity, sequence-specific DNA binding (GO:0003700);; Cellular Component: nucleus (GO:0005634);; Biological Process: regulation of transcription from RNA polymerase II promoter (GO:0006357);; Biological Process: regulation of cell cycle (GO:0051726);…	K09028|5.1e-172|lcf:108875663|K09028 transcription factor jun-B | (RefSeq) transcription factor jun-B-like isoform X1	--	[K]	Transcription	Jun-like transcription factor	Transcription factor jun-B OS=Cyprinus carpio OX=7962 GN=junb PE=2 SV=1	K	Transcription	PREDICTED: transcription factor jun-B-like isoform X1 [Lates calcarifer]	biological process: developmental process (GO:0032502);; biological process: single-organism process (GO:0044699);; molecular function: binding (GO:0005488);; biological process: biological regulation (GO:0065007);; molecular function: nucleic acid binding transcription factor activity (GO:0001071);; cellular component: cell (GO:0005623);; cellular component: organelle (GO:0043226);; cellular com…
gene-LOC119886395	LOC119886395	39.529881	2155	23.072868	1300	16.11709	1095	6.811317	443	3.162741	193	1.703981	103	6.18E-05	-1.828542735	down	--	--	Biological Process: negative regulation of transcription from RNA polymerase II promoter (GO:0000122);; Biological Process: cell activation (GO:0001775);; Biological Process: adaptive immune response (GO:0002250);; Biological Process: immune effector process (GO:0002252);; Biological Process: activation of immune response (GO:0002253);; Biological Process: immune system process (GO:0002376);; Bio…	K08890|1.6e-35|cmy:102931113|K08890 B lymphoid tyrosine kinase [EC:2.7.10.2] | (RefSeq) BLK; BLK proto-oncogene, Src family tyrosine kinase	--	--	--	SH2 domain	Proto-oncogene tyrosine-protein kinase LCK OS=Gallus gallus OX=9031 GN=LCK PE=2 SV=2	T	Signal transduction mechanisms	hypothetical protein PFLUV_G00040000 [Perca fluviatilis]	biological process: biological regulation (GO:0065007);; biological process: cellular process (GO:0009987);; biological process: single-organism process (GO:0044699);; biological process: immune system process (GO:0002376);; biological process: response to stimulus (GO:0050896);; biological process: signaling (GO:0023052);; molecular function: catalytic activity (GO:0003824);; biological process:…
gene-LOC119900145	LOC119900145	3.851244	115	3.874799	119	1.401731	52	0.424876	16	0.27944	10	0.277845	10	0.00019406	-1.817153195	down	--	--	Biological Process: response to acid chemical (GO:0001101);; Cellular Component: cellular_component (GO:0005575);; Cellular Component: cell (GO:0005623);; Cellular Component: plasma membrane (GO:0005886);; Biological Process: multicellular organism development (GO:0007275);; Biological Process: nervous system development (GO:0007399);; Biological Process: central nervous system development (GO:00…	K17270|1.4e-52|lco:104937830|K17270 myelin-oligodendrocyte glycoprotein | (RefSeq) myelin-oligodendrocyte glycoprotein-like isoform X1	--	--	--	Immunoglobulin V-set domain	--	S	Function unknown	butyrophilin subfamily 1 member A1-like [Epinephelus lanceolatus]	biological process: response to stimulus (GO:0050896);; cellular component: cell (GO:0005623);; cellular component: membrane (GO:0016020);; cellular component: cell part (GO:0044464);; biological process: multicellular organismal process (GO:0032501);; biological process: developmental process (GO:0032502);; biological process: single-organism process (GO:0044699);; cellular component: membrane p…
gene-apol	apol	9.951213	773	7.852666	630	7.629596	739	19.755764	1829	15.999604	1390	16.340101	1400	0.000209325	1.062045338	up	--	--	Cellular Component: extracellular region (GO:0005576);; Biological Process: lipid transport (GO:0006869);; Molecular Function: lipid binding (GO:0008289);; Biological Process: lipoprotein metabolic process (GO:0042157);;	K14480|4.8e-242|sdu:111217773|K14480 apolipoprotein L | (RefSeq) uncharacterized protein LOC111217773	--	--	--	Apolipoprotein L	--	S	Function unknown	uncharacterized protein LOC104938820 isoform X1 [Larimichthys crocea]	cellular component: extracellular region (GO:0005576);; biological process: single-organism process (GO:0044699);; biological process: localization (GO:0051179);; molecular function: binding (GO:0005488);; biological process: metabolic process (GO:0008152)
gene-pnp5a	pnp5a	328.275177	14606	327.738464	15073	167.311234	9280	95.859154	5087	56.179386	2798	52.55872	2581	3.44E-05	-1.558001814	down	[F]	Nucleotide transport and metabolism	Molecular Function: purine-nucleoside phosphorylase activity (GO:0004731);; Biological Process: nucleoside metabolic process (GO:0009116);;	K03783|1.2e-159|sdu:111235647|K03783 purine-nucleoside phosphorylase [EC:2.4.2.1] | (RefSeq) pnp; purine nucleoside phosphorylase	Purine metabolism (ko00230);; Pyrimidine metabolism (ko00240);; Nicotinate and nicotinamide metabolism (ko00760)	[F]	Nucleotide transport and metabolism	Phosphorylase superfamily	--	F	Nucleotide transport and metabolism	purine nucleoside phosphorylase-like [Hippoglossus hippoglossus]	molecular function: catalytic activity (GO:0003824);; biological process: metabolic process (GO:0008152);; biological process: cellular process (GO:0009987);; biological process: single-organism process (GO:0044699)
Micropterus_salmoides_newGene_3588	--	2.181721	82	3.281838	88	1.654277	50	0.548668	18	0.530226	16	0.320054	9	0.008027037	-1.462531767	down	--	--	Cellular Component: integral component of membrane (GO:0016021);; Biological Process: retina development in camera-type eye (GO:0060041);; Biological Process: sensory epithelium regeneration (GO:0070654);;	K08523|2.2e-38|sdu:111226747|K08523 heparin-binding EGF-like growth factor | (RefSeq) proheparin-binding EGF-like growth factor isoform X1	ErbB signaling pathway (ko04012);; GnRH signaling pathway (ko04912)	--	--	--	--	T	Signal transduction mechanisms	proheparin-binding EGF-like growth factor [Seriola lalandi dorsalis]	cellular component: membrane (GO:0016020);; cellular component: membrane part (GO:0044425);; biological process: developmental process (GO:0032502);; biological process: growth (GO:0040007);; biological process: single-organism process (GO:0044699);; biological process: response to stimulus (GO:0050896)
Micropterus_salmoides_newGene_3749	--	21.460467	453	11.477972	267	20.066189	528	6.300326	152	3.380837	86	6.290144	143	0.001441306	-1.331978492	down	--	--	--	--	--	--	--	--	--	--	--	--	--
gene-LOC119916780	LOC119916780	0.20241	10	0.269939	14	0.308878	19	1.938444	109	1.051342	56	1.29585	67	0.000138058	1.73155403	up	--	--	Biological Process: protein polyubiquitination (GO:0000209);; Cellular Component: lysosome (GO:0005764);; Biological Process: apoptotic process (GO:0006915);; Biological Process: positive regulation of autophagy (GO:0010508);; Cellular Component: integral component of membrane (GO:0016021);; Molecular Function: ubiquitin protein ligase activity (GO:0061630);; Biological Process: negative regulati…	K15705|2.3e-117|sdu:111237916|K15705 E3 ubiquitin-protein ligase RNF152 [EC:2.3.2.27] | (RefSeq) rnf152; E3 ubiquitin-protein ligase RNF152	mTOR signaling pathway (ko04150)	[O]	Posttranslational modification, protein turnover, chaperones	zinc-RING finger domain	E3 ubiquitin-protein ligase RNF152 OS=Gallus gallus OX=9031 GN=RNF152 PE=3 SV=1	O	Posttranslational modification, protein turnover, chaperones	E3 ubiquitin-protein ligase RNF152 [Seriola dumerili]	biological process: metabolic process (GO:0008152);; biological process: cellular process (GO:0009987);; cellular component: cell (GO:0005623);; cellular component: organelle (GO:0043226);; cellular component: cell part (GO:0044464);; biological process: single-organism process (GO:0044699);; biological process: biological regulation (GO:0065007);; cellular component: membrane (GO:0016020);; cell…
gene-LOC119900496	LOC119900496	4.759665	287	6.092685	379	2.482747	187	1.423316	103	0.574784	39	0.610224	41	0.000683747	-1.600668302	down	--	--	Molecular Function: DNA binding (GO:0003677);; Molecular Function: transcription factor activity, sequence-specific DNA binding (GO:0003700);; Cellular Component: nucleus (GO:0005634);; Biological Process: regulation of transcription from RNA polymerase II promoter (GO:0006357);;	K04449|2.1e-128|lco:104930914|K04449 transcription factor jun-D | (RefSeq) jund; transcription factor jun-D	MAPK signaling pathway (ko04010)	[K]	Transcription	Jun-like transcription factor	Transcription factor AP-1 OS=Gallus gallus OX=9031 GN=JUN PE=1 SV=2	K	Transcription	transcription factor jun-D [Mastacembelus armatus]	molecular function: binding (GO:0005488);; biological process: biological regulation (GO:0065007);; molecular function: nucleic acid binding transcription factor activity (GO:0001071);; cellular component: cell (GO:0005623);; cellular component: organelle (GO:0043226);; cellular component: cell part (GO:0044464)
gene-LOC119900143	LOC119900143	9.163825	131	22.332788	330	10.366321	185	0.555955	10	0.411941	7	0.552544	9	1.47E-13	-2.926827311	down	--	--	--	K17270|3.2e-55|lcf:108886830|K17270 myelin-oligodendrocyte glycoprotein | (RefSeq) myelin-oligodendrocyte glycoprotein-like	--	--	--	Immunoglobulin V-set domain	--	--	--	myelin-oligodendrocyte glycoprotein-like [Morone saxatilis]	--
gene-LOC119901095	LOC119901095	3.751412	205	1.849984	105	21.998274	1493	0.182255	12	0.503995	31	0.837252	51	0.008027037	-1.511460805	down	[O]	Posttranslational modification, protein turnover, chaperones	Molecular Function: serine-type endopeptidase activity (GO:0004252);;	K01345|4.0e-151|lco:104919063|K01345 pancreatic endopeptidase E [EC:3.4.21.70] | (RefSeq) chymotrypsin-like elastase family member 3B	--	[E]	Amino acid transport and metabolism	Trypsin	Elastase-1 OS=Salmo salar OX=8030 PE=1 SV=1	E	Amino acid transport and metabolism	chymotrypsin-like elastase family member 3B [Sander lucioperca]	biological process: metabolic process (GO:0008152);; molecular function: catalytic activity (GO:0003824)
