# Supplementary material for: Effect of Autolyzed Yarrowia lipolytica on the Growth Performance, Antioxidant Capacity, Intestinal Histology, Microbiota, and Transcriptome Profile of Juvenile Largemouth Bass (Micropterus salmoides)
Source: Int J Mol Sci. 2022 Sep 15;23(18):10780. doi: 10.3390/ijms231810780 (PMC9503160; doi:10.3390/ijms231810780)
Supplement: Supplementary file 1 [file ijms-23-10780-s001.zip › Table S7.xls]

#ID	gene_name	Con1_FPKM	Con1_count	Con2_FPKM	Con2_count	Con3_FPKM	Con3_count	YL50-1_FPKM	YL50-1_count	YL50-2_FPKM	YL50-2_count	YL50-3_FPKM	YL50-3_count	FDR	log2FC	regulated	COG_class	COG_class_annotation	GO_annotation	KEGG_annotation	KEGG_pathway_annotation	KOG_class	KOG_class_annotation	Pfam_annotation	Swiss_Prot_annotation	eggNOG_class	eggNOG_class_annotation	NR_annotation	GO_second_level_annotation
gene-adrb1	adrb1	0.566462	40	0.530471	39	0.46664	42	0.069634	6	0.090201	8	0.046544	4	0.00249036677521369	-1.70440437052787	down	--	--	Biological Process: regulation of heart rate (GO:0002027);; Molecular Function: beta1-adrenergic receptor activity (GO:0004940);; Cellular Component: plasma membrane (GO:0005886);; Biological Process: adenylate cyclase-activating G-protein coupled receptor signaling pathway (GO:0007189);; Cellular Component: integral component of membrane (GO:0016021);; Biological Process: positive regulation of …	K04141|3.1e-208|sdu:111219546|K04141 adrenergic receptor beta-1 | (RefSeq) adrb1; beta-1 adrenergic receptor	Calcium signaling pathway (ko04020);; Neuroactive ligand-receptor interaction (ko04080);; Adrenergic signaling in cardiomyocytes (ko04261);; Gap junction (ko04540)	[R]	General function prediction only	7 transmembrane receptor (rhodopsin family)	Beta-1 adrenergic receptor OS=Xenopus laevis OX=8355 GN=adrb1 PE=2 SV=1	T	Signal transduction mechanisms	beta-1 adrenergic receptor [Seriola dumerili]	biological process: biological regulation (GO:0065007);; biological process: cellular process (GO:0009987);; biological process: signaling (GO:0023052);; biological process: single-organism process (GO:0044699);; biological process: response to stimulus (GO:0050896);; molecular function: signal transducer activity (GO:0004871);; molecular function: molecular transducer activity (GO:0060089);; cel…
gene-enpp6	enpp6	33.687763	2520	15.452868	1195	19.620535	1830	68.968071	6067	43.950733	4083	55.590065	4721	0.00356683683960949	1.21809444459518	up	[R]	General function prediction only	Cellular Component: plasma membrane (GO:0005886);; Molecular Function: glycerophosphocholine cholinephosphodiesterase activity (GO:0047390);;	K08743|3.4e-236|sdu:111230387|K08743 ectonucleotide pyrophosphatase/phosphodiesterase family member 6 [EC:3.1.4.-] | (RefSeq) enpp6; ectonucleotide pyrophosphatase/phosphodiesterase family member 6	Ether lipid metabolism (ko00565)	[R]	General function prediction only	Type I phosphodiesterase / nucleotide pyrophosphatase	Glycerophosphocholine cholinephosphodiesterase ENPP6 OS=Danio rerio OX=7955 GN=enpp6 PE=2 SV=1	S	Function unknown	glycerophosphocholine cholinephosphodiesterase ENPP6 [Morone saxatilis]	cellular component: cell (GO:0005623);; cellular component: membrane (GO:0016020);; cellular component: cell part (GO:0044464);; molecular function: catalytic activity (GO:0003824)
Micropterus_salmoides_newGene_1774	--	2.0646649999999998	106	3.7614039999999997	200	1.846992	116	0.173948	11	0.227224	16	0.33171	21	1.69731265261533e-07	-2.30995050982907	down	--	--	--	--	--	--	--	--	--	--	--	--	--
gene-ch25h	ch25h	10.962624	582	10.750886	590	6.976394	462	2.272086	142	1.479341	98	2.598302	157	4.80379176151042e-08	-1.80075439547793	down	--	--	Molecular Function: iron ion binding (GO:0005506);; Biological Process: lipid biosynthetic process (GO:0008610);; Cellular Component: integral component of membrane (GO:0016021);; Molecular Function: oxidoreductase activity (GO:0016491);;	K10223|9.0e-137|lcf:108891484|K10223 cholesterol 25-hydroxylase [EC:1.14.99.38] | (RefSeq) ch25h; cholesterol 25-hydroxylase	Primary bile acid biosynthesis (ko00120)	[I]	Lipid transport and metabolism	Fatty acid hydroxylase superfamily	Cholesterol 25-hydroxylase-like protein OS=Danio rerio OX=7955 GN=ch25h PE=2 SV=1	I	Lipid transport and metabolism	cholesterol 25-hydroxylase-like protein [Morone saxatilis]	molecular function: binding (GO:0005488);; biological process: metabolic process (GO:0008152);; biological process: single-organism process (GO:0044699);; cellular component: membrane (GO:0016020);; cellular component: membrane part (GO:0044425);; molecular function: catalytic activity (GO:0003824)
gene-dhrs1	dhrs1	27.62941	1248	19.580866	915	26.009708	1465	60.515987	3215	49.016567	2750	40.648239	2085	0.00298189530821095	1.06297899233755	up	[IQR]	Lipid transport and metabolism;; Secondary metabolites biosynthesis, transport and catabolism;; General function prediction only	Cellular Component: cellular_component (GO:0005575);; Cellular Component: intracellular (GO:0005622);; Cellular Component: cell (GO:0005623);; Cellular Component: cytoplasm (GO:0005737);; Cellular Component: endoplasmic reticulum (GO:0005783);; Cellular Component: endomembrane system (GO:0012505);; Cellular Component: organelle (GO:0043226);; Cellular Component: membrane-bounded organelle (GO:004…	K11163|2.9e-161|lcf:108883937|K11163 dehydrogenase/reductase SDR family member 1 [EC:1.1.-.-] | (RefSeq) dhrs1; dehydrogenase/reductase SDR family member 1	--	[R]	General function prediction only	short chain dehydrogenase	Hydroxysteroid dehydrogenase-like protein 2 OS=Danio rerio OX=7955 GN=hsdl2 PE=2 SV=1	Q	Secondary metabolites biosynthesis, transport and catabolism	PREDICTED: dehydrogenase/reductase SDR family member 1 [Lates calcarifer]	cellular component: cell (GO:0005623);; cellular component: cell part (GO:0044464);; cellular component: organelle (GO:0043226)
gene-sik1	sik1	16.84922	2337	15.78495	2263	13.134863	2271	3.395528	554	2.741496	473	2.618235	413	2.10239749199693e-16	-2.06675267004371	down	[M]	Cell wall/membrane/envelope biogenesis	Molecular Function: protein serine/threonine kinase activity (GO:0004674);; Molecular Function: ATP binding (GO:0005524);;	K19008|0.0e+00|sdu:111218548|K19008 serine/threonine-protein kinase SIK1 [EC:2.7.11.1] | (RefSeq) serine/threonine-protein kinase SIK2-like	--	[R]	General function prediction only	Protein kinase domain	Serine/threonine-protein kinase SIK2 OS=Gallus gallus OX=9031 GN=SIK2 PE=2 SV=1	T	Signal transduction mechanisms	serine/threonine-protein kinase SIK1 [Morone saxatilis]	biological process: metabolic process (GO:0008152);; biological process: cellular process (GO:0009987);; molecular function: catalytic activity (GO:0003824);; molecular function: binding (GO:0005488)
gene-LOC119886190	LOC119886190	10.551997	634	12.366814000000002	752	5.658137	428	0.571569	40	1.905149	143	1.457948	96	2.01110574168089e-05	-1.98743236640911	down	--	--	Biological Process: regulation of cell growth (GO:0001558);; Biological Process: regulation of protein phosphorylation (GO:0001932);; Biological Process: negative regulation of protein phosphorylation (GO:0001933);; Molecular Function: molecular_function (GO:0003674);; Molecular Function: enzyme inhibitor activity (GO:0004857);; Molecular Function: protein kinase inhibitor activity (GO:0004860);;…	K04701|1.5e-114|lco:104930954|K04701 cytokine inducible SH2-containing protein | (RefSeq) cish; cytokine-inducible SH2-containing protein isoform X1	--	[T]	Signal transduction mechanisms	SH2 domain	Cytokine-inducible SH2-containing protein OS=Gallus gallus OX=9031 GN=CISH PE=2 SV=1	T	Signal transduction mechanisms	cytokine-inducible SH2-containing protein [Epinephelus lanceolatus]	biological process: biological regulation (GO:0065007);; molecular function: molecular function regulator (GO:0098772);; cellular component: cell (GO:0005623);; cellular component: cell part (GO:0044464);; cellular component: membrane (GO:0016020);; biological process: metabolic process (GO:0008152);; biological process: cellular process (GO:0009987);; biological process: signaling (GO:0023052);;…
gene-LOC119899441	LOC119899441	0.857216	129	1.4699149999999999	220	0.468508	90	0.111971	21	0.115446	22	0.100533	18	1.0362854918569e-05	-2.06243957576604	down	--	--	Molecular Function: ATP binding (GO:0005524);; Biological Process: regulation of apoptotic process (GO:0042981);;	K22615|1.9e-293|lco:104928558|K22615 NLR family CARD domain containing 5 | (RefSeq) uncharacterized protein LOC104928558 isoform X1	--	--	--	NACHT domain	--	S	Function unknown	uncharacterized protein LOC111234836 [Seriola dumerili]	molecular function: binding (GO:0005488);; biological process: biological regulation (GO:0065007)
gene-dusp1	dusp1	290.892395	19381	247.34848	17034	132.083603	10970	66.486191	5210	80.890572	6694	79.793282	6036	0.00256905849549686	-1.22246091083868	down	--	--	Molecular Function: protein tyrosine phosphatase activity (GO:0004725);; Molecular Function: MAP kinase tyrosine/serine/threonine phosphatase activity (GO:0017017);;	K21278|1.7e-208|sdu:111226686|K21278 dual specificity protein phosphatase 1 [EC:3.1.3.16 3.1.3.48] | (RefSeq) dusp1; dual specificity protein phosphatase 1	MAPK signaling pathway (ko04010)	[V]	Defense mechanisms	Dual specificity phosphatase, catalytic domain	Dual specificity protein phosphatase 1-A OS=Xenopus laevis OX=8355 GN=dusp1-a PE=1 SV=1	V	Defense mechanisms	dual specificity protein phosphatase 1 [Seriola dumerili]	biological process: metabolic process (GO:0008152);; biological process: cellular process (GO:0009987);; molecular function: catalytic activity (GO:0003824);; biological process: biological regulation (GO:0065007)
Micropterus_salmoides_newGene_3430	--	78.591488	4369	86.03289	4734	49.74862	3114	1.127051	67	9.445596	610	1.368033	104	2.44892391130003e-05	-2.21174675832573	down	[F]	Nucleotide transport and metabolism	Molecular Function: purine-nucleoside phosphorylase activity (GO:0004731);; Biological Process: nucleoside metabolic process (GO:0009116);;	K03783|1.6e-118|lco:104932305|K03783 purine-nucleoside phosphorylase [EC:2.4.2.1] | (RefSeq) purine nucleoside phosphorylase	Purine metabolism (ko00230);; Pyrimidine metabolism (ko00240);; Nicotinate and nicotinamide metabolism (ko00760)	[F]	Nucleotide transport and metabolism	Phosphorylase superfamily	--	F	Nucleotide transport and metabolism	Purine nucleoside phosphorylase [Collichthys lucidus]	molecular function: catalytic activity (GO:0003824);; biological process: metabolic process (GO:0008152);; biological process: cellular process (GO:0009987);; biological process: single-organism process (GO:0044699)
gene-leap2	leap2	12.139912	975	5.531935	459	28.279282	2829	2.247735	213	2.775087	277	3.314832	302	0.00125682532697779	-1.66892600146489	down	--	--	Biological Process: defense response to bacterium (GO:0042742);;	--	--	--	--	Liver-expressed antimicrobial peptide 2 precursor (LEAP-2)	--	S	Function unknown	liver-expressed antimicrobial peptide 2 [Siniperca chuatsi]	biological process: response to stimulus (GO:0050896);; biological process: multi-organism process (GO:0051704)
gene-hoxd9a	hoxd9a	0.837404	46	1.066376	60	0.897372	61	0.113481	8	0.117602	8	0.297357	19	0.00645226444817921	-1.53157541226767	down	--	--	Biological Process: reproduction (GO:0000003);; Biological Process: negative regulation of transcription from RNA polymerase II promoter (GO:0000122);; Molecular Function: transcription regulatory region sequence-specific DNA binding (GO:0000976);; Molecular Function: RNA polymerase II regulatory region sequence-specific DNA binding (GO:0000977);; Molecular Function: RNA polymerase II distal enha…	K09294|5.1e-138|sdu:111218407|K09294 homeobox protein HoxB/C/D9 | (RefSeq) homeobox protein Hox-D9a-like	--	[K]	Transcription	Hox9 activation region	Homeobox protein Hox-D9a OS=Takifugu rubripes OX=31033 GN=hoxd9a PE=3 SV=1	K	Transcription	homeobox protein Hox-D9a [Morone saxatilis]	biological process: reproduction (GO:0000003);; biological process: biological regulation (GO:0065007);; molecular function: binding (GO:0005488);; molecular function: nucleic acid binding transcription factor activity (GO:0001071);; biological process: multicellular organismal process (GO:0032501);; biological process: developmental process (GO:0032502);; biological process: single-organism proc…
gene-LOC119898284	LOC119898284	1.217297	162	1.638311	225	0.867734	144	0.258842	41	0.425446	70	0.278597	42	0.00350526269905054	-1.40992494387983	down	[R]	General function prediction only	Molecular Function: endopeptidase inhibitor activity (GO:0004866);; Cellular Component: extracellular space (GO:0005615);;	K03989|0.0e+00|sdu:111238774|K03989 complement component 4 | (RefSeq) complement C4-like	--	[O]	Posttranslational modification, protein turnover, chaperones	A-macroglobulin TED domain	Complement C3 (Fragment) OS=Lethenteron camtschaticum OX=980415 GN=C3 PE=2 SV=1	O	Posttranslational modification, protein turnover, chaperones	complement component 4 [Oplegnathus fasciatus]	biological process: biological regulation (GO:0065007);; molecular function: molecular function regulator (GO:0098772);; cellular component: extracellular region (GO:0005576);; cellular component: extracellular region part (GO:0044421)
gene-LOC119890110	LOC119890110	9.386489000000001	734	5.119546000000001	414	6.480662	632	20.951611999999997	1925	16.060764	1559	12.835643	1139	0.00392441128345439	1.19871218994225	up	[M]	Cell wall/membrane/envelope biogenesis	Molecular Function: catalytic activity (GO:0003824);; Biological Process: biosynthetic process (GO:0009058);;	K00967|6.3e-225|mze:101487187|K00967 ethanolamine-phosphate cytidylyltransferase [EC:2.7.7.14] | (RefSeq) ethanolamine-phosphate cytidylyltransferase isoform X1	Phosphonate and phosphinate metabolism (ko00440);; Glycerophospholipid metabolism (ko00564)	[I]	Lipid transport and metabolism	Cytidylyltransferase-like	--	I	Lipid transport and metabolism	ethanolamine-phosphate cytidylyltransferase-like isoform X1 [Mastacembelus armatus]	molecular function: catalytic activity (GO:0003824);; biological process: metabolic process (GO:0008152)
gene-tefb	tefb	15.255063	2164	13.2571	1949	12.458839	2212	1.993305	335	5.352227	941	1.90086	308	0.00275534180723396	-1.49378887982921	down	--	--	Molecular Function: transcription regulatory region sequence-specific DNA binding (GO:0000976);; Molecular Function: RNA polymerase II regulatory region sequence-specific DNA binding (GO:0000977);; Molecular Function: RNA polymerase II core promoter proximal region sequence-specific DNA binding (GO:0000978);; Molecular Function: RNA polymerase II transcription factor activity, sequence-specific D…	K09058|8.7e-112|malb:109952661|K09058 thyrotrophic embryonic factor | (RefSeq) tef; thyrotroph embryonic factor isoform X1	--	[K]	Transcription	Basic region leucine zipper	Transcription factor VBP OS=Gallus gallus OX=9031 GN=TEF PE=1 SV=2	K	Transcription	TEF transcription factor, PAR bZIP family member b isoform X1 [Sander lucioperca]	molecular function: binding (GO:0005488);; biological process: biological regulation (GO:0065007);; molecular function: nucleic acid binding transcription factor activity (GO:0001071);; biological process: metabolic process (GO:0008152);; biological process: cellular process (GO:0009987);; cellular component: cell (GO:0005623);; cellular component: cell part (GO:0044464);; cellular component: org…
Micropterus_salmoides_newGene_5342	--	9.098143	1306	4.9094809999999995	698	4.487932	716	15.62556	2520	12.032908	2078	14.066816	2780	0.00479112346011679	1.20694575729202	up	--	--	Molecular Function: iron ion binding (GO:0005506);; Cellular Component: integral component of membrane (GO:0016021);; Molecular Function: oxidoreductase activity, acting on paired donors, with incorporation or reduction of molecular oxygen, reduced flavin or flavoprotein as one donor, and incorporation of one atom of oxygen (GO:0016712);; Molecular Function: heme binding (GO:0020037);;	K07418|9.3e-46|sdu:111232107|K07418 cytochrome P450 family 2 subfamily J [EC:1.14.14.1 1.14.14.73 1.14.14.74 1.14.14.75] | (RefSeq) cytochrome P450 2J6-like	Arachidonic acid metabolism (ko00590);; Linoleic acid metabolism (ko00591)	[Q]	Secondary metabolites biosynthesis, transport and catabolism	Cytochrome P450	Cytochrome P450 2H2 OS=Gallus gallus OX=9031 GN=CYP2H2 PE=1 SV=1	Q	Secondary metabolites biosynthesis, transport and catabolism	cytochrome P450 2J2-like [Cottoperca gobio]	molecular function: binding (GO:0005488);; cellular component: membrane (GO:0016020);; cellular component: membrane part (GO:0044425);; biological process: metabolic process (GO:0008152);; biological process: single-organism process (GO:0044699);; molecular function: catalytic activity (GO:0003824)
gene-LOC119884012	LOC119884012	10.204021	529	7.04399	378	10.277119	664	33.066147	2016	21.313717	1372	14.312144	843	0.00771032579804631	1.22221815239653	up	[C]	Energy production and conversion	Molecular Function: malate dehydrogenase (decarboxylating) (NAD+) activity (GO:0004471);; Molecular Function: metal ion binding (GO:0046872);; Molecular Function: NAD binding (GO:0051287);;	K00029|5.8e-218|lcf:108887447|K00029 malate dehydrogenase (oxaloacetate-decarboxylating)(NADP+) [EC:1.1.1.40] | (RefSeq) me1; NADP-dependent malic enzyme isoform X1	Pyruvate metabolism (ko00620);; Carbon metabolism (ko01200);; PPAR signaling pathway (ko03320)	[C]	Energy production and conversion	Malic enzyme, NAD binding domain	NADP-dependent malic enzyme OS=Anas platyrhynchos OX=8839 GN=ME1 PE=1 SV=1	C	Energy production and conversion	NADP-dependent malic enzyme [Epinephelus lanceolatus]	biological process: metabolic process (GO:0008152);; biological process: single-organism process (GO:0044699);; molecular function: catalytic activity (GO:0003824);; molecular function: binding (GO:0005488)
gene-etv4	etv4	9.304351	504	12.702775	711	14.372586	970	4.909649	313	5.081639	342	4.58842	282	0.00298189530821095	-1.05535390413912	down	--	--	Molecular Function: transcription factor activity, sequence-specific DNA binding (GO:0003700);; Cellular Component: nucleus (GO:0005634);; Molecular Function: sequence-specific DNA binding (GO:0043565);;	K15592|4.8e-281|sdu:111220456|K15592 ets translocation variant 4 | (RefSeq) etv4; ETS translocation variant 4	--	[K]	Transcription	PEA3 subfamily ETS-domain transcription factor N terminal domain	ETS translocation variant 4 OS=Danio rerio OX=7955 GN=etv4 PE=1 SV=2	K	Transcription	ETS translocation variant 4 [Seriola lalandi dorsalis]	biological process: biological regulation (GO:0065007);; molecular function: nucleic acid binding transcription factor activity (GO:0001071);; cellular component: cell (GO:0005623);; cellular component: organelle (GO:0043226);; cellular component: cell part (GO:0044464);; molecular function: binding (GO:0005488)
gene-vgf	vgf	0.633621	90	0.432288	64	0.194151	35	0.055635	10	0.057368	11	0.031152	5	0.00265409186546386	-1.72100114271509	down	--	--	Molecular Function: neuropeptide hormone activity (GO:0005184);;	--	--	--	--	--	--	S	Function unknown	neurosecretory protein VGF-like [Morone saxatilis]	molecular function: binding (GO:0005488)
gene-tm7sf2	tm7sf2	6.602946	373	5.61909	329	4.395715	310	19.512901	1297	12.594411	884	11.466581	736	0.000380055676430716	1.33463723822134	up	[O]	Posttranslational modification, protein turnover, chaperones	Cellular Component: integral component of membrane (GO:0016021);; Biological Process: sterol biosynthetic process (GO:0016126);; Molecular Function: oxidoreductase activity, acting on the CH-CH group of donors, NAD or NADP as acceptor (GO:0016628);;	K00222|2.3e-233|lcf:108894070|K00222 Delta14-sterol reductase [EC:1.3.1.70] | (RefSeq) tm7sf2; delta(14)-sterol reductase	Steroid biosynthesis (ko00100)	[IT]	Lipid transport and metabolism;; Signal transduction mechanisms	Ergosterol biosynthesis ERG4/ERG24 family	Delta(14)-sterol reductase LBR OS=Gallus gallus OX=9031 GN=LBR PE=1 SV=1	--	--	PREDICTED: delta(14)-sterol reductase [Lates calcarifer]	cellular component: membrane (GO:0016020);; cellular component: membrane part (GO:0044425);; biological process: metabolic process (GO:0008152);; biological process: single-organism process (GO:0044699);; molecular function: catalytic activity (GO:0003824)
gene-LOC119893956	LOC119893956	36.059005	1060	29.219506000000003	889	51.200275	1877	2.8184329999999997	98	12.080825	442	1.692102	58	0.00857639694520299	-1.56708794556654	down	--	--	Molecular Function: RNA polymerase II transcription factor activity, sequence-specific DNA binding (GO:0000981);; Molecular Function: molecular_function (GO:0003674);; Molecular Function: DNA binding (GO:0003677);; Molecular Function: transcription factor activity, sequence-specific DNA binding (GO:0003700);; Biological Process: regulation of transcription, DNA-templated (GO:0006355);; Biological…	K09451|3.3e-80|malb:109961840|K09451 homeobox protein aristaless-like 4 | (RefSeq) intestine-specific homeobox-like	--	[R]	General function prediction only	Homeodomain	ALX homeobox protein 1 OS=Xenopus laevis OX=8355 GN=alx1 PE=2 SV=1	K	Transcription	intestine-specific homeobox-like [Larimichthys crocea]	biological process: biological regulation (GO:0065007);; molecular function: nucleic acid binding transcription factor activity (GO:0001071);; molecular function: binding (GO:0005488)
gene-hemgn	hemgn	7.514867	329	4.704807	214	8.862893	484	30.244405999999998	1556	27.491132	1494	24.132675	1198	2.42927368723559e-08	1.83915951437398	up	--	--	--	--	--	--	--	--	--	--	--	cyclin-dependent kinase inhibitor 1C-like isoform X1 [Seriola lalandi dorsalis]	--
gene-LOC119901010	LOC119901010	37.626672	2952	23.189683	1880	25.170185	2461	71.563011	6523	41.402966	3986	72.729279	6465	0.00463563422068987	1.07808022159375	up	[P]	Inorganic ion transport and metabolism	Molecular Function: N,N-dimethylaniline monooxygenase activity (GO:0004499);; Cellular Component: endoplasmic reticulum membrane (GO:0005789);; Molecular Function: flavin adenine dinucleotide binding (GO:0050660);; Molecular Function: NADP binding (GO:0050661);;	K00485|1.2e-306|lcf:108879131|K00485 dimethylaniline monooxygenase (N-oxide forming) [EC:1.14.13.8] | (RefSeq) LOW QUALITY PROTEIN: dimethylaniline monooxygenase [N-oxide-forming] 5-like	Drug metabolism - cytochrome P450 (ko00982)	[Q]	Secondary metabolites biosynthesis, transport and catabolism	Flavin-binding monooxygenase-like	--	Q	Secondary metabolites biosynthesis, transport and catabolism	PREDICTED: LOW QUALITY PROTEIN: dimethylaniline monooxygenase [N-oxide-forming] 5-like [Lates calcarifer]	biological process: metabolic process (GO:0008152);; biological process: single-organism process (GO:0044699);; molecular function: catalytic activity (GO:0003824);; cellular component: cell (GO:0005623);; cellular component: membrane (GO:0016020);; cellular component: organelle (GO:0043226);; cellular component: organelle part (GO:0044422);; cellular component: membrane part (GO:0044425);; cellu…
Micropterus_salmoides_newGene_3780	--	6.592549	177	6.871336	191	3.540636	119	0.923514	30	0.656798	22	2.056595	63	0.00242443384164133	-1.56304094337389	down	--	--	--	--	--	--	--	--	--	--	--	--	--
gene-adamtsl5	adamtsl5	8.206423	1123	10.866352	1537	15.331874	2615	4.038136	650	3.361759	572	4.206005	654	0.00019800145645034	-1.28043665433245	down	--	--	Cellular Component: extracellular region (GO:0005576);;	K23624|5.2e-60|els:105015910|K23624 papilin | (RefSeq) papln; papilin isoform X1	--	[O]	Posttranslational modification, protein turnover, chaperones	ADAM-TS Spacer 1	--	O	Posttranslational modification, protein turnover, chaperones	ADAMTS-like protein 5 [Morone saxatilis]	cellular component: extracellular region (GO:0005576)
Micropterus_salmoides_newGene_2562	--	7.631285	397	6.521452	351	8.511853	552	3.148123	193	1.33101	86	3.280794	194	0.00568753262207436	-1.21407594653499	down	--	--	Molecular Function: nucleic acid binding (GO:0003676);;	--	--	--	--	--	--	S	Function unknown	hypothetical protein D4764_03G0005110 [Takifugu flavidus]	molecular function: binding (GO:0005488)
gene-LOC119886498	LOC119886498	1.814231	145	2.100971	173	1.911995	190	0.564529	53	0.667527	66	0.951215	86	0.00628506352402067	-1.12215894622298	down	--	--	Molecular Function: kinase activity (GO:0016301);;	K05631|3.7e-196|lco:104924132|K05631 atrophin-1 interacting protein 3 (BAI1-associated protein 1) | (RefSeq) magi1; membrane-associated guanylate kinase, WW and PDZ domain-containing protein 1 isoform X2	Tight junction (ko04530)	[R]	General function prediction only	PDZ domain	Membrane-associated guanylate kinase, WW and PDZ domain-containing protein 3 OS=Gallus gallus OX=9031 GN=MAGI3 PE=2 SV=1	O	Posttranslational modification, protein turnover, chaperones	Membrane-associated guanylate kinase, WW and PDZ domain-containing protein 1 [Larimichthys crocea]	molecular function: catalytic activity (GO:0003824)
gene-satb2	satb2	36.911568	6083	59.346875	10104	116.94363200000001	24025	9.051735	1757	10.035461999999999	2056	27.742772	5194	0.00345296691025041	-1.53416052570144	down	--	--	Molecular Function: DNA binding (GO:0003677);; Cellular Component: nucleus (GO:0005634);; Biological Process: chromatin remodeling (GO:0006338);; Biological Process: epiboly involved in gastrulation with mouth forming second (GO:0055113);;	K23226|0.0e+00|malb:109971636|K23226 DNA-binding protein SATB2 | (RefSeq) satb2; DNA-binding protein SATB2 isoform X1	--	[K]	Transcription	CUT1-like DNA-binding domain of SATB	--	K	Transcription	DNA-binding protein SATB2 isoform X1 [Mastacembelus armatus]	molecular function: binding (GO:0005488);; cellular component: cell (GO:0005623);; cellular component: organelle (GO:0043226);; cellular component: cell part (GO:0044464);; biological process: cellular process (GO:0009987);; biological process: cellular component organization or biogenesis (GO:0071840);; biological process: multicellular organismal process (GO:0032501);; biological process: devel…
gene-LOC119888105	LOC119888105	16.716715	436	20.287876	546	142.205383	4614	2.653359	82	2.19514	71	2.828042	84	1.01287985836144e-06	-2.47190707199434	down	[O]	Posttranslational modification, protein turnover, chaperones	Molecular Function: serine-type endopeptidase activity (GO:0004252);;	K01310|2.5e-145|lcf:108894207|K01310 chymotrypsin [EC:3.4.21.1] | (RefSeq) chymotrypsin B	--	[E]	Amino acid transport and metabolism	Trypsin	Chymotrypsin B OS=Gadus morhua OX=8049 PE=1 SV=1	E	Amino acid transport and metabolism	chymotrypsinogen 1 [Thunnus orientalis]	biological process: metabolic process (GO:0008152);; molecular function: catalytic activity (GO:0003824)
gene-dusp5	dusp5	21.985039	992	21.693207	1012	15.703355	883	4.390246	233	4.619354	259	9.047081	464	0.000204157301808385	-1.39369212795589	down	[T]	Signal transduction mechanisms	Molecular Function: protein tyrosine phosphatase activity (GO:0004725);; Molecular Function: MAP kinase tyrosine/serine/threonine phosphatase activity (GO:0017017);;	K04459|1.9e-207|lco:104922130|K04459 dual specificity MAP kinase phosphatase [EC:3.1.3.16 3.1.3.48] | (RefSeq) dusp5; dual specificity protein phosphatase 5	MAPK signaling pathway (ko04010)	[V]	Defense mechanisms	Dual specificity phosphatase, catalytic domain	Dual specificity protein phosphatase 1-A OS=Xenopus laevis OX=8355 GN=dusp1-a PE=1 SV=1	V	Defense mechanisms	dual specificity protein phosphatase 5 [Morone saxatilis]	biological process: metabolic process (GO:0008152);; biological process: cellular process (GO:0009987);; molecular function: catalytic activity (GO:0003824);; biological process: biological regulation (GO:0065007)
gene-hmgcra	hmgcra	17.996643	2089	22.640831	2716	21.706917	3140	95.411499	13021	45.43351	6548	44.233807	5828	0.000317298449385082	1.4460410255857	up	[I]	Lipid transport and metabolism	Biological Process: reproduction (GO:0000003);; Molecular Function: nucleotide binding (GO:0000166);; Biological Process: regulation of protein phosphorylation (GO:0001932);; Biological Process: negative regulation of protein phosphorylation (GO:0001933);; Biological Process: positive regulation of protein phosphorylation (GO:0001934);; Biological Process: regulation of peptide secretion (GO:0002…	K00021|0.0e+00|lco:104937871|K00021 hydroxymethylglutaryl-CoA reductase (NADPH) [EC:1.1.1.34] | (RefSeq) hmgcr; 3-hydroxy-3-methylglutaryl-Coenzyme A reductase	Terpenoid backbone biosynthesis (ko00900)	[I]	Lipid transport and metabolism	Hydroxymethylglutaryl-coenzyme A reductase	3-hydroxy-3-methylglutaryl-coenzyme A reductase OS=Xenopus laevis OX=8355 GN=hmgcr PE=2 SV=1	I	Lipid transport and metabolism	3-hydroxy-3-methylglutaryl-CoA reductase a [Epinephelus lanceolatus]	biological process: reproduction (GO:0000003);; molecular function: binding (GO:0005488);; biological process: biological regulation (GO:0065007);; biological process: reproductive process (GO:0022414);; biological process: developmental process (GO:0032502);; biological process: multicellular organismal process (GO:0032501);; molecular function: catalytic activity (GO:0003824);; biological proce…
gene-LOC119901224	LOC119901224	65.599909	4258	52.13944	3507	66.196693	5374	148.461206	11391	121.89416599999998	9868	97.897528	7229	0.00267987847989946	1.04314868145216	up	[C]	Energy production and conversion	Molecular Function: oxidoreductase activity, acting on the aldehyde or oxo group of donors, NAD or NADP as acceptor (GO:0016620);;	K00149|7.5e-284|sdu:111231960|K00149 aldehyde dehydrogenase family 9 member A1 [EC:1.2.1.47 1.2.1.3] | (RefSeq) aldehyde dehydrogenase family 9 member A1	Glycolysis / Gluconeogenesis (ko00010);; Ascorbate and aldarate metabolism (ko00053);; Fatty acid degradation (ko00071);; Valine, leucine and isoleucine degradation (ko00280);; Lysine degradation (ko00310);; Arginine and proline metabolism (ko00330);; Histidine metabolism (ko00340);; Tryptophan metabolism (ko00380);; beta-Alanine metabolism (ko00410);; Glycerolipid metabolism (ko00561);; Pyruvate…	[C]	Energy production and conversion	Aldehyde dehydrogenase family	4-trimethylaminobutyraldehyde dehydrogenase OS=Oryzias latipes OX=8090 GN=aldh9A1 PE=2 SV=1	C	Energy production and conversion	4-trimethylaminobutyraldehyde dehydrogenase A [Morone saxatilis]	biological process: metabolic process (GO:0008152);; biological process: single-organism process (GO:0044699);; molecular function: catalytic activity (GO:0003824)
gene-LOC119902398	LOC119902398	60.061954	3476	66.833595	3998	33.528538	2419	10.292758	701	15.854947	1140	16.834059	1107	0.000103851179550036	-1.49985208709307	down	--	--	Molecular Function: DNA binding (GO:0003677);; Molecular Function: transcription factor activity, sequence-specific DNA binding (GO:0003700);;	K04448|6.9e-155|lco:104927418|K04448 transcription factor AP-1 | (RefSeq) jun; transcription factor AP-1	MAPK signaling pathway (ko04010);; ErbB signaling pathway (ko04012);; Mitophagy - animal (ko04137);; Apoptosis (ko04210);; Wnt signaling pathway (ko04310);; Focal adhesion (ko04510);; Tight junction (ko04530);; Toll-like receptor signaling pathway (ko04620);; NOD-like receptor signaling pathway (ko04621);; C-type lectin receptor signaling pathway (ko04625);; GnRH signaling pathway (ko04912);; Sal…	[K]	Transcription	Jun-like transcription factor	Transcription factor AP-1 OS=Coturnix japonica OX=93934 GN=JUN PE=2 SV=1	K	Transcription	Transcription factor AP-1 [Larimichthys crocea]	molecular function: binding (GO:0005488);; biological process: biological regulation (GO:0065007);; molecular function: nucleic acid binding transcription factor activity (GO:0001071)
gene-si:ch211-39i2.2	si:ch211-39i2.2	41.531967	1269	52.962639	1672	15.578969	593	4.832624	174	6.233466	237	7.602549	264	1.75754980472448e-05	-1.88567807157337	down	--	--	Cellular Component: cytoplasm (GO:0005737);; Biological Process: negative regulation of signal transduction (GO:0009968);;	K08270|1.8e-18|srx:107732761|K08270 DNA-damage-inducible transcript 4 | (RefSeq) DNA damage-inducible transcript 4 protein	Autophagy - animal (ko04140);; mTOR signaling pathway (ko04150)	--	--	RTP801 C-terminal region	DNA damage-inducible transcript 4-like protein OS=Oncorhynchus mykiss OX=8022 GN=ddit4l PE=2 SV=1	S	Function unknown	DNA damage-inducible transcript 4-like protein [Epinephelus lanceolatus]	cellular component: cell (GO:0005623);; cellular component: cell part (GO:0044464);; biological process: biological regulation (GO:0065007)
gene-LOC119905996	LOC119905996	7.7962	1059	10.057764	1412	6.867538	1163	1.751246	280	2.304965	389	1.940257	300	3.024369810595e-08	-1.69472195664509	down	[T]	Signal transduction mechanisms	Molecular Function: protein serine/threonine kinase activity (GO:0004674);; Molecular Function: ATP binding (GO:0005524);;	K08859|1.1e-235|sdu:111233801|K08859 serine/threonine kinase 35 [EC:2.7.11.1] | (RefSeq) serine/threonine-protein kinase 35-like	--	[OUT]	Posttranslational modification, protein turnover, chaperones;; Intracellular trafficking, secretion, and vesicular transport;; Signal transduction mechanisms	Protein kinase domain	Serine/threonine-protein kinase pdik1l OS=Danio rerio OX=7955 GN=pdik1l PE=2 SV=1	T	Signal transduction mechanisms	serine/threonine-protein kinase 35-like [Seriola dumerili]	biological process: metabolic process (GO:0008152);; biological process: cellular process (GO:0009987);; molecular function: catalytic activity (GO:0003824);; molecular function: binding (GO:0005488)
gene-rasgef1ba	rasgef1ba	4.808986	468	5.428425	546	8.810059	1067	2.757231	316	1.995741	241	1.80514	200	0.00596977054651681	-1.18535355480221	down	--	--	Molecular Function: molecular_function (GO:0003674);; Molecular Function: guanyl-nucleotide exchange factor activity (GO:0005085);; Molecular Function: Ras guanyl-nucleotide exchange factor activity (GO:0005088);; Molecular Function: binding (GO:0005488);; Molecular Function: protein binding (GO:0005515);; Biological Process: small GTPase mediated signal transduction (GO:0007264);; Biological Pro…	K03099|1.9e-148|zne:110841535|K03099 son of sevenless | (RefSeq) uncharacterized protein LOC110841535 isoform X1	MAPK signaling pathway - fly (ko04013);; FoxO signaling pathway (ko04068);; mTOR signaling pathway (ko04150);; Dorso-ventral axis formation (ko04320)	[T]	Signal transduction mechanisms	RasGEF domain	Ras-GEF domain-containing family member 1B-A OS=Danio rerio OX=7955 GN=rasgef1ba PE=2 SV=2	T	Signal transduction mechanisms	ras-GEF domain-containing family member 1B [Sparus aurata]	biological process: biological regulation (GO:0065007);; molecular function: molecular function regulator (GO:0098772);; molecular function: binding (GO:0005488);; biological process: cellular process (GO:0009987);; biological process: signaling (GO:0023052);; biological process: single-organism process (GO:0044699);; biological process: response to stimulus (GO:0050896)
gene-plek2	plek2	4.548635	197	4.773	214	1.559405	85	0.324174	17	0.278971	15	0.350057	18	2.24416061966209e-07	-2.36298217735602	down	--	--	Biological Process: intracellular signal transduction (GO:0035556);;	K19993|3.2e-180|lcf:108886671|K19993 pleckstrin | (RefSeq) plek2; pleckstrin-2	--	--	--	PH domain	Switch-associated protein 70 OS=Gallus gallus OX=9031 GN=SWAP70 PE=2 SV=1	T	Signal transduction mechanisms	pleckstrin-2 [Anarrhichthys ocellatus]	biological process: cellular process (GO:0009987);; biological process: signaling (GO:0023052);; biological process: single-organism process (GO:0044699);; biological process: response to stimulus (GO:0050896);; biological process: biological regulation (GO:0065007)
gene-LOC119908082	LOC119908082	15.375776	1053	8.860846	628	24.782772	2116	4.274748	345	3.04959	260	4.361191	340	0.000158396143873592	-1.59261721245468	down	--	--	Biological Process: negative regulation of transcription from RNA polymerase II promoter (GO:0000122);; Molecular Function: transcription factor activity, sequence-specific DNA binding (GO:0003700);; Cellular Component: nucleus (GO:0005634);; Cellular Component: cytoplasm (GO:0005737);; Biological Process: cellular developmental process (GO:0048869);;	K11432|1.3e-84|nfu:107385249|K11432 [histone H3]-lysine9 N-trimethyltransferase PRDM2 [EC:2.1.1.355] | (RefSeq) PR domain zinc finger protein 2-like	Lysine degradation (ko00310)	[K]	Transcription	Zinc-finger double domain	PR domain zinc finger protein 10 OS=Danio rerio OX=7955 GN=prdm10 PE=3 SV=2	K	Transcription	PR domain zinc finger protein 1 isoform X2 [Morone saxatilis]	biological process: biological regulation (GO:0065007);; molecular function: nucleic acid binding transcription factor activity (GO:0001071);; cellular component: cell (GO:0005623);; cellular component: organelle (GO:0043226);; cellular component: cell part (GO:0044464);; biological process: cellular process (GO:0009987);; biological process: developmental process (GO:0032502);; biological proces…
gene-dhcr24	dhcr24	9.57148	627	4.953156	335	4.615907	377	27.401993	2109	16.901661	1374	13.198903	981	0.00277703370272416	1.39621745104348	up	[C]	Energy production and conversion	Cellular Component: integral component of membrane (GO:0016021);; Molecular Function: oxidoreductase activity (GO:0016491);; Molecular Function: FAD binding (GO:0071949);;	K09828|7.1e-306|lcf:108879153|K09828 Delta24-sterol reductase [EC:1.3.1.72 1.3.1.-] | (RefSeq) dhcr24; delta(24)-sterol reductase	Steroid biosynthesis (ko00100)	[R]	General function prediction only	FAD binding domain	--	C	Energy production and conversion	delta(24)-sterol reductase [Morone saxatilis]	cellular component: membrane (GO:0016020);; cellular component: membrane part (GO:0044425);; molecular function: catalytic activity (GO:0003824);; molecular function: binding (GO:0005488)
gene-si:ch1073-13h15.3	si:ch1073-13h15.3	192.966446	10606	97.990295	5567	230.952698	15823	544.7547	35214	460.253967	31417	317.994873	19844	0.00841183173184918	1.23250391550782	up	[Q]	Secondary metabolites biosynthesis, transport and catabolism	--	K09516|0.0e+00|lcf:108876653|K09516 all-trans-retinol 13,14-reductase [EC:1.3.99.23] | (RefSeq) putative all-trans-retinol 13,14-reductase	Retinol metabolism (ko00830)	[H]	Coenzyme transport and metabolism	NAD(P)-binding Rossmann-like domain	Inactive all-trans-retinol 13,14-reductase OS=Danio rerio OX=7955 GN=retsatl PE=1 SV=1	H	Coenzyme transport and metabolism	inactive all-trans-retinol 13,14-reductase [Epinephelus lanceolatus]	--
gene-mxd3	mxd3	2.466096	138	1.973113	114	2.313397	161	5.640766	370	5.08482	352	4.274447	270	0.00135809190757637	1.15353296774505	up	--	--	Molecular Function: protein dimerization activity (GO:0046983);;	K09114|9.4e-97|lcf:108882858|K09114 MAX dimerization protein | (RefSeq) max dimerization protein 3-like	--	[K]	Transcription	Helix-loop-helix DNA-binding domain	Max dimerization protein 3 OS=Danio rerio OX=7955 GN=mxd3 PE=2 SV=1	K	Transcription	max dimerization protein 3 [Acanthochromis polyacanthus]	molecular function: binding (GO:0005488)
gene-fasn	fasn	4.620018	1344	2.839278	854	4.179218	1516	12.082584	4134	8.731901	3155	7.922305	2617	0.000367801432059418	1.27878495637503	up	[Q]	Secondary metabolites biosynthesis, transport and catabolism	Molecular Function: fatty acid synthase activity (GO:0004312);; Biological Process: biosynthetic process (GO:0009058);; Molecular Function: oxidoreductase activity (GO:0016491);; Molecular Function: hydrolase activity, acting on ester bonds (GO:0016788);; Molecular Function: phosphopantetheine binding (GO:0031177);;	K00665|0.0e+00|sdu:111237039|K00665 fatty acid synthase, animal type [EC:2.3.1.85] | (RefSeq) fasn; fatty acid synthase	Fatty acid biosynthesis (ko00061);; Fatty acid metabolism (ko01212);; Insulin signaling pathway (ko04910)	[I]	Lipid transport and metabolism	Acyl transferase domain	Fatty acid synthase OS=Gallus gallus OX=9031 GN=FASN PE=1 SV=5	I	Lipid transport and metabolism	fatty acid synthase [Sander lucioperca]	molecular function: catalytic activity (GO:0003824);; biological process: metabolic process (GO:0008152);; molecular function: binding (GO:0005488)
gene-nr1d4a	nr1d4a	2.284242	293	1.217667	162	1.701537	272	0.289357	44	0.267777	43	0.45372	67	1.93716083377627e-06	-1.84828945102026	down	--	--	Molecular Function: steroid hormone receptor activity (GO:0003707);; Molecular Function: RNA polymerase II transcription factor activity, ligand-activated sequence-specific DNA binding (GO:0004879);; Cellular Component: nucleus (GO:0005634);; Molecular Function: zinc ion binding (GO:0008270);; Cellular Component: host cell nucleus (GO:0042025);; Molecular Function: sequence-specific DNA binding (…	K03728|6.3e-287|sdu:111219063|K03728 nuclear receptor subfamily 1 group D member 1 | (RefSeq) nuclear receptor subfamily 1 group D member 1-like	--	[T]	Signal transduction mechanisms	Zinc finger, C4 type (two domains)	Nuclear receptor ROR-alpha B OS=Danio rerio OX=7955 GN=rorab PE=2 SV=1	K	Transcription	nuclear receptor subfamily 1 group D member 1-like [Seriola dumerili]	biological process: cellular process (GO:0009987);; biological process: signaling (GO:0023052);; biological process: single-organism process (GO:0044699);; biological process: response to stimulus (GO:0050896);; biological process: biological regulation (GO:0065007);; molecular function: signal transducer activity (GO:0004871);; molecular function: molecular transducer activity (GO:0060089);; mol…
gene-LOC119913033	LOC119913033	149.037369	5015	167.93483	5841	61.15316	2565	1.665208	66	0.49182	21	5.150027	197	4.73852096079369e-13	-3.32283190894433	down	--	--	Biological Process: response to acid chemical (GO:0001101);; Cellular Component: cellular_component (GO:0005575);; Cellular Component: cell (GO:0005623);; Cellular Component: plasma membrane (GO:0005886);; Biological Process: multicellular organism development (GO:0007275);; Biological Process: nervous system development (GO:0007399);; Biological Process: central nervous system development (GO:00…	K17270|9.1e-70|lco:104937830|K17270 myelin-oligodendrocyte glycoprotein | (RefSeq) myelin-oligodendrocyte glycoprotein-like isoform X1	--	--	--	Immunoglobulin V-set domain	--	S	Function unknown	Selection and upkeep of intraepithelial T-cells protein 1 [Larimichthys crocea]	biological process: response to stimulus (GO:0050896);; cellular component: cell (GO:0005623);; cellular component: membrane (GO:0016020);; cellular component: cell part (GO:0044464);; biological process: multicellular organismal process (GO:0032501);; biological process: developmental process (GO:0032502);; biological process: single-organism process (GO:0044699);; cellular component: membrane p…
gene-LOC119909656	LOC119909656	3.504774	285	1.303722	110	2.652879	269	0.666955	64	0.396925	41	0.733077	68	0.00235821030386803	-1.4905734143523	down	--	--	Biological Process: protein polyubiquitination (GO:0000209);; Biological Process: regulation of Toll signaling pathway (GO:0008592);; Molecular Function: ubiquitin protein ligase activity (GO:0061630);;	K11964|2.2e-196|lcf:108892595|K11964 pellino [EC:2.3.2.27] | (RefSeq) E3 ubiquitin-protein ligase pellino homolog 2	--	[T]	Signal transduction mechanisms	Pellino	--	T	Signal transduction mechanisms	E3 ubiquitin-protein ligase pellino homolog 2 [Anabas testudineus]	biological process: metabolic process (GO:0008152);; biological process: cellular process (GO:0009987);; biological process: biological regulation (GO:0065007);; molecular function: catalytic activity (GO:0003824)
gene-LOC119916760	LOC119916760	2.127652	59	1.291726	37	18.987455	654	0.134434	5	0.30886	11	0.452161	15	0.00170046801411341	-1.82355426574909	down	[O]	Posttranslational modification, protein turnover, chaperones	Molecular Function: serine-type endopeptidase activity (GO:0004252);;	K01345|5.2e-143|ncc:104959852|K01345 pancreatic endopeptidase E [EC:3.4.21.70] | (RefSeq) LOW QUALITY PROTEIN: proproteinase E-like	--	[E]	Amino acid transport and metabolism	Trypsin	Elastase-1 OS=Salmo salar OX=8030 PE=1 SV=1	O	Posttranslational modification, protein turnover, chaperones	proproteinase E-like [Perca flavescens]	biological process: metabolic process (GO:0008152);; molecular function: catalytic activity (GO:0003824)
gene-LOC119882630	LOC119882630	9.813861	1434	11.104962	1677	7.004268	1276	1.963499	338	2.254732	410	2.812528	467	1.42345457462844e-08	-1.67534154365034	down	--	--	Molecular Function: molecular_function (GO:0003674);; Molecular Function: catalytic activity (GO:0003824);; Molecular Function: metalloendopeptidase activity (GO:0004222);; Molecular Function: receptor binding (GO:0005102);; Molecular Function: integrin binding (GO:0005178);; Molecular Function: transporter activity (GO:0005215);; Molecular Function: binding (GO:0005488);; Molecular Function: pro…	K08623|0.0e+00|lco:104935663|K08623 a disintegrin and metalloproteinase with thrombospondin motifs 8 [EC:3.4.24.-] | (RefSeq) adamts8; A disintegrin and metalloproteinase with thrombospondin motifs 8	--	[O]	Posttranslational modification, protein turnover, chaperones	ADAM-TS Spacer 1	Zinc metalloproteinase-disintegrin-like VMP-III OS=Agkistrodon piscivorus leucostoma OX=459671 PE=2 SV=1	O	Posttranslational modification, protein turnover, chaperones	hypothetical protein PFLUV_G00018140 [Perca fluviatilis]	molecular function: catalytic activity (GO:0003824);; biological process: metabolic process (GO:0008152);; molecular function: binding (GO:0005488);; molecular function: transporter activity (GO:0005215);; biological process: localization (GO:0051179);; biological process: biological regulation (GO:0065007)
gene-dhrs4	dhrs4	23.679916	898	19.302444	757	15.25131	721	46.057316	2055	45.464474	2142	45.779308	1972	1.27808101368969e-05	1.26609900763612	up	[IQR]	Lipid transport and metabolism;; Secondary metabolites biosynthesis, transport and catabolism;; General function prediction only	Molecular Function: 3-keto sterol reductase activity (GO:0000253);; Biological Process: retinoid metabolic process (GO:0001523);; Molecular Function: retinal dehydrogenase activity (GO:0001758);; Molecular Function: molecular_function (GO:0003674);; Molecular Function: catalytic activity (GO:0003824);; Molecular Function: aldo-keto reductase (NADP) activity (GO:0004033);; Molecular Function: carb…	K11147|1.7e-136|lco:104932907|K11147 dehydrogenase/reductase SDR family member 4 [EC:1.1.-.-] | (RefSeq) dehydrogenase/reductase SDR family member 4	Retinol metabolism (ko00830);; Peroxisome (ko04146)	[R]	General function prediction only	Enoyl-(Acyl carrier protein) reductase	--	Q	Secondary metabolites biosynthesis, transport and catabolism	hypothetical protein PFLUV_G00166540 [Perca fluviatilis]	biological process: metabolic process (GO:0008152);; biological process: single-organism process (GO:0044699);; molecular function: catalytic activity (GO:0003824);; biological process: cellular process (GO:0009987);; molecular function: binding (GO:0005488);; cellular component: cell (GO:0005623);; cellular component: cell part (GO:0044464);; cellular component: organelle (GO:0043226);; cellular…
gene-LOC119882883	LOC119882883	19.728497	606	19.991833	635	13.01897	499	2.822888	102	3.234319	124	5.652258	198	1.05874353476381e-06	-1.75762514889095	down	[C]	Energy production and conversion	Biological Process: system process (GO:0003008);; Molecular Function: molecular_function (GO:0003674);; Molecular Function: catalytic activity (GO:0003824);; Molecular Function: retinol dehydrogenase activity (GO:0004745);; Cellular Component: cellular_component (GO:0005575);; Cellular Component: intracellular (GO:0005622);; Cellular Component: cell (GO:0005623);; Cellular Component: cytoplasm (G…	K22970|2.3e-124|ncc:104967580|K22970 17beta-estradiol 17-dehydrogenase / 3beta-hydroxysteroid 3-dehydrogenase [EC:1.1.1.62 1.1.1.270] | (RefSeq) dehydrogenase/reductase SDR family member 11-like	Steroid hormone biosynthesis (ko00140)	[Q]	Secondary metabolites biosynthesis, transport and catabolism	short chain dehydrogenase	Dehydrogenase/reductase SDR family member 11 OS=Gallus gallus OX=9031 GN=DHRS11 PE=2 SV=1	Q	Secondary metabolites biosynthesis, transport and catabolism	dehydrogenase/reductase SDR family member 11-like [Morone saxatilis]	biological process: multicellular organismal process (GO:0032501);; molecular function: catalytic activity (GO:0003824);; biological process: metabolic process (GO:0008152);; biological process: single-organism process (GO:0044699);; cellular component: cell (GO:0005623);; cellular component: cell part (GO:0044464);; biological process: cellular process (GO:0009987);; biological process: biologic…
gene-scg2a	scg2a	3.009583	213	3.222686	236	2.762725	244	1.25812	105	1.144058	101	1.004131	81	0.0024954129244057	-1.11313871851979	down	--	--	Biological Process: MAPK cascade (GO:0000165);; Biological Process: angiogenesis (GO:0001525);; Biological Process: blood vessel development (GO:0001568);; Biological Process: ameboidal-type cell migration (GO:0001667);; Biological Process: regulation of endothelial cell proliferation (GO:0001936);; Biological Process: negative regulation of endothelial cell proliferation (GO:0001937);; Biologica…	--	--	--	--	Granin (chromogranin or secretogranin)	Secretogranin-2 OS=Pelophylax ridibundus OX=8406 PE=1 SV=2	S	Function unknown	secretogranin-2 [Sander lucioperca]	biological process: metabolic process (GO:0008152);; biological process: cellular process (GO:0009987);; biological process: signaling (GO:0023052);; biological process: single-organism process (GO:0044699);; biological process: response to stimulus (GO:0050896);; biological process: biological regulation (GO:0065007);; biological process: developmental process (GO:0032502);; biological process: …
gene-rbp5	rbp5	24.194967	700	11.135002	333	12.840151	463	51.900024	1765	32.61729	1171	39.545719	1298	0.00368340616823631	1.2603472259317	up	--	--	Molecular Function: retinal binding (GO:0016918);;	K06210|5.1e-41|lco:104933935|K06210 nicotinamide mononucleotide adenylyltransferase [EC:2.7.7.1 2.7.7.18] | (RefSeq) uncharacterized protein LOC104933935	Nicotinate and nicotinamide metabolism (ko00760)	[I]	Lipid transport and metabolism	Lipocalin / cytosolic fatty-acid binding protein family	Cellular retinoic acid-binding protein 2 OS=Xenopus laevis OX=8355 GN=crabp2 PE=2 SV=2	I	Lipid transport and metabolism	retinol-binding protein 5 [Morone saxatilis]	molecular function: binding (GO:0005488)
Micropterus_salmoides_newGene_4082	--	1.338448	153	0.570621	68	0.276758	40	9.676725	1297	9.509843	1345	1.235925	160	0.00115181267144323	1.8532509803875	up	--	--	--	K04644|7.5e-25|nfu:107390942|K04644 clathrin light chain A | (RefSeq) clta; clathrin light chain A isoform X1	Lysosome (ko04142);; Endocytosis (ko04144)	--	--	Protein of unknown function (DUF3421)	Natterin-3 OS=Thalassophryne nattereri OX=289382 PE=1 SV=1	S	Function unknown	hypothetical protein EPR50_G00055360 [Perca flavescens]	--
gene-LOC119917536	LOC119917536	2.460925	214	2.868435	258	2.699573	293	0.207672	22	0.400493	44	0.496712	50	1.49680068880845e-09	-2.23275006330027	down	--	--	Biological Process: ossification (GO:0001503);; Molecular Function: molecular_function (GO:0003674);; Molecular Function: catalytic activity (GO:0003824);; Molecular Function: acid phosphatase activity (GO:0003993);; Molecular Function: inositol-hexakisphosphate phosphatase activity (GO:0004446);; Molecular Function: phosphoprotein phosphatase activity (GO:0004721);; Cellular Component: cellular_…	K03103|1.6e-140|lco:104927472|K03103 multiple inositol-polyphosphate phosphatase / 2,3-bisphosphoglycerate 3-phosphatase [EC:3.1.3.62 3.1.3.80] | (RefSeq) multiple inositol polyphosphate phosphatase 1	Glycolysis / Gluconeogenesis (ko00010);; Inositol phosphate metabolism (ko00562)	[R]	General function prediction only	Histidine phosphatase superfamily (branch 2)	Multiple inositol polyphosphate phosphatase 1 OS=Gallus gallus OX=9031 GN=MINPP1 PE=1 SV=3	S	Function unknown	hypothetical protein PFLUV_G00222390 [Perca fluviatilis]	biological process: multicellular organismal process (GO:0032501);; biological process: single-organism process (GO:0044699);; molecular function: catalytic activity (GO:0003824);; biological process: metabolic process (GO:0008152);; biological process: cellular process (GO:0009987);; cellular component: extracellular region (GO:0005576);; cellular component: extracellular region part (GO:0044421…
gene-LOC119887853	LOC119887853	5.946663	108	6.421696	121	4.731041	107	11.514204	246	17.263634	389	17.262817	356	0.000221038723186123	1.36824906325601	up	--	--	--	--	--	--	--	--	--	--	--	--	--
gene-LOC119911470	LOC119911470	144.010437	6944	63.551277	3168	83.5644	5023	300.513763	17041	321.488068	19252	356.536591	19518	6.36533471227388e-06	1.62749969242067	up	--	--	Biological Process: system process (GO:0003008);; Molecular Function: molecular_function (GO:0003674);; Molecular Function: transporter activity (GO:0005215);; Molecular Function: lipid transporter activity (GO:0005319);; Molecular Function: long-chain fatty acid transporter activity (GO:0005324);; Molecular Function: binding (GO:0005488);; Molecular Function: fatty acid binding (GO:0005504);; Ce…	K08751|2.8e-65|sdu:111239076|K08751 fatty acid-binding protein 2, intestinal | (RefSeq) fatty acid-binding protein, intestinal-like	PPAR signaling pathway (ko03320)	[I]	Lipid transport and metabolism	Lipocalin / cytosolic fatty-acid binding protein family	Fatty acid-binding protein, intestinal OS=Xenopus laevis OX=8355 GN=fabp2 PE=2 SV=2	I	Lipid transport and metabolism	fatty acid-binding protein, intestinal-like [Epinephelus lanceolatus]	biological process: multicellular organismal process (GO:0032501);; molecular function: transporter activity (GO:0005215);; biological process: localization (GO:0051179);; biological process: single-organism process (GO:0044699);; molecular function: binding (GO:0005488);; cellular component: cell (GO:0005623);; cellular component: cell part (GO:0044464);; cellular component: membrane (GO:0016020…
gene-ltb4r2b	ltb4r2b	0.34081	33	0.165594	17	0.330729	40	0.826625	95	0.738779	89	0.931405	103	0.0065718904739745	1.34393452426191	up	--	--	Molecular Function: G-protein coupled receptor activity (GO:0004930);; Cellular Component: cell surface (GO:0009986);; Cellular Component: integral component of membrane (GO:0016021);;	K04297|1.2e-129|sdu:111231262|K04297 leukotriene B4 receptor 2 | (RefSeq) leukotriene B4 receptor 1-like	Calcium signaling pathway (ko04020);; Neuroactive ligand-receptor interaction (ko04080)	[R]	General function prediction only	7 transmembrane receptor (rhodopsin family)	C3a anaphylatoxin chemotactic receptor OS=Oncorhynchus mykiss OX=8022 GN=c3ar1 PE=2 SV=1	T	Signal transduction mechanisms	leukotriene B4 receptor 2b [Notolabrus celidotus]	biological process: cellular process (GO:0009987);; biological process: signaling (GO:0023052);; biological process: single-organism process (GO:0044699);; biological process: response to stimulus (GO:0050896);; biological process: biological regulation (GO:0065007);; molecular function: signal transducer activity (GO:0004871);; molecular function: molecular transducer activity (GO:0060089);; cel…
gene-nr1d1	nr1d1	6.866123	627	6.637562	626	3.748876	427	0.932663	101	1.17787	134	1.178262	122	3.10362609834954e-08	-1.92613815729009	down	--	--	Cellular Component: chromatin (GO:0000785);; Molecular Function: transcriptional repressor activity, RNA polymerase II transcription regulatory region sequence-specific binding (GO:0001227);; Molecular Function: steroid hormone receptor activity (GO:0003707);; Molecular Function: RNA polymerase II transcription factor activity, ligand-activated sequence-specific DNA binding (GO:0004879);; Cellula…	K03728|1.7e-245|lcf:108891029|K03728 nuclear receptor subfamily 1 group D member 1 | (RefSeq) LOW QUALITY PROTEIN: nuclear receptor subfamily 1 group D member 1-like	--	[T]	Signal transduction mechanisms	Zinc finger, C4 type (two domains)	Nuclear receptor ROR-alpha A OS=Danio rerio OX=7955 GN=roraa PE=2 SV=2	K	Transcription	PREDICTED: LOW QUALITY PROTEIN: nuclear receptor subfamily 1 group D member 1-like [Lates calcarifer]	cellular component: cell (GO:0005623);; cellular component: organelle (GO:0043226);; cellular component: organelle part (GO:0044422);; cellular component: cell part (GO:0044464);; biological process: biological regulation (GO:0065007);; molecular function: nucleic acid binding transcription factor activity (GO:0001071);; biological process: cellular process (GO:0009987);; biological process: sign…
Micropterus_salmoides_newGene_3784	--	3.904761	546	5.619161	812	2.809893	490	0.543059	90	0.606449	106	1.748604	278	0.00256905849549686	-1.51487632432454	down	--	--	Molecular Function: protein binding (GO:0005515);;	K23949|2.2e-61|sdu:111227563|K23949 sterile alpha motif domain-contaning protein 9 | (RefSeq) sterile alpha motif domain-containing protein 9-like	--	--	--	SAM domain (Sterile alpha motif)	--	S	Function unknown	hypothetical protein D5F01_LYC07645 [Larimichthys crocea]	molecular function: binding (GO:0005488)
Micropterus_salmoides_newGene_1349	--	4.532179	235	2.824142	152	7.762137	502	1.30832	80	1.540086	100	1.269763	75	0.00714831521636206	-1.34835074434885	down	--	--	Molecular Function: nucleic acid binding (GO:0003676);;	--	--	--	--	--	--	S	Function unknown	hypothetical protein D4764_03G0005110 [Takifugu flavidus]	molecular function: binding (GO:0005488)
gene-arl5c	arl5c	14.776457	790	15.128188	836	11.747404	783	4.633576	292	4.60236	306	5.59968	340	1.50975122934993e-06	-1.26085729713706	down	[R]	General function prediction only	Molecular Function: GTP binding (GO:0005525);;	K07950|2.5e-93|lco:104926360|K07950 ADP-ribosylation factor-like protein 5B | (RefSeq) ADP-ribosylation factor-like protein 5B	--	[U]	Intracellular trafficking, secretion, and vesicular transport	ADP-ribosylation factor family	ADP-ribosylation factor 1 OS=Xenopus laevis OX=8355 GN=arf1 PE=2 SV=2	U	Intracellular trafficking, secretion, and vesicular transport	ADP-ribosylation factor-like protein 5B [Collichthys lucidus]	molecular function: binding (GO:0005488)
gene-phlda2	phlda2	177.069183	3914	175.511826	4010	77.025078	2123	30.473764	793	19.047346	523	53.175152	1335	0.000555910110552216	-1.56678478164189	down	--	--	Biological Process: positive regulation of apoptotic process (GO:0043065);; Molecular Function: phosphatidylinositol phosphate binding (GO:1901981);;	--	--	--	--	PH domain	Pleckstrin homology-like domain family A member 2 OS=Salmo salar OX=8030 GN=phlda2 PE=2 SV=1	T	Signal transduction mechanisms	pleckstrin homology-like domain family A member 2 [Mastacembelus armatus]	biological process: biological regulation (GO:0065007);; molecular function: binding (GO:0005488)
Micropterus_salmoides_newGene_2996	--	1.241695	223	1.964664	364	4.042787	902	0.246204	52	0.430367	96	0.190349	39	2.47307227557982e-05	-2.03307928398471	down	--	--	Molecular Function: G-protein coupled receptor activity (GO:0004930);; Cellular Component: integral component of membrane (GO:0016021);;	K04150|1.3e-111|lco:104920033|K04150 histamine receptor H2 | (RefSeq) histamine H2 receptor	Calcium signaling pathway (ko04020);; Neuroactive ligand-receptor interaction (ko04080)	[R]	General function prediction only	7 transmembrane receptor (rhodopsin family)	Beta-4C adrenergic receptor OS=Meleagris gallopavo OX=9103 GN=ADRB4C PE=2 SV=1	T	Signal transduction mechanisms	histamine receptor H2b [Morone saxatilis]	biological process: cellular process (GO:0009987);; biological process: signaling (GO:0023052);; biological process: single-organism process (GO:0044699);; biological process: response to stimulus (GO:0050896);; biological process: biological regulation (GO:0065007);; molecular function: signal transducer activity (GO:0004871);; molecular function: molecular transducer activity (GO:0060089);; cel…
gene-LOC119886035	LOC119886035	6.348431	815	7.497019	994	3.00091	480	0.14732	23	0.24436	39	0.314134	46	4.87436278770157e-20	-3.46377204552852	down	--	--	Molecular Function: steroid hormone receptor activity (GO:0003707);; Molecular Function: RNA polymerase II transcription factor activity, ligand-activated sequence-specific DNA binding (GO:0004879);; Cellular Component: nucleus (GO:0005634);; Molecular Function: zinc ion binding (GO:0008270);; Cellular Component: host cell nucleus (GO:0042025);; Molecular Function: sequence-specific DNA binding (…	K04465|0.0e+00|lco:104931814|K04465 nuclear receptor subfamily 4 group A member 1 | (RefSeq) probable nuclear hormone receptor HR38	MAPK signaling pathway (ko04010)	[K]	Transcription	Ligand-binding domain of nuclear hormone receptor	Nuclear receptor subfamily 4 group A member 1 OS=Xenopus laevis OX=8355 GN=nr4a1 PE=2 SV=1	K	Transcription	Nuclear receptor subfamily 4 group A member 1 [Collichthys lucidus]	biological process: cellular process (GO:0009987);; biological process: signaling (GO:0023052);; biological process: single-organism process (GO:0044699);; biological process: response to stimulus (GO:0050896);; biological process: biological regulation (GO:0065007);; molecular function: signal transducer activity (GO:0004871);; molecular function: molecular transducer activity (GO:0060089);; mol…
gene-LOC119919337	LOC119919337	1.930108	451	2.569719	620	1.15401	336	0.414763	114	0.360591	105	0.74428	198	0.00112286231116335	-1.45296942959971	down	--	--	Molecular Function: Rho guanyl-nucleotide exchange factor activity (GO:0005089);; Biological Process: regulation of Rho protein signal transduction (GO:0035023);;	K24316|3.9e-66|pcw:110218971|K24316 Rho guanine nucleotide exchange factor 40 | (RefSeq) ARHGEF40; LOW QUALITY PROTEIN: rho guanine nucleotide exchange factor 40	--	[T]	Signal transduction mechanisms	RhoGEF domain	Triple functional domain protein OS=Danio rerio OX=7955 GN=trio PE=3 SV=1	T	Signal transduction mechanisms	uncharacterized protein LOC118324753 [Morone saxatilis]	biological process: biological regulation (GO:0065007);; molecular function: molecular function regulator (GO:0098772)
gene-zgc:162730	zgc:162730	256.837982	18733	186.301575	14045	155.11644	14103	49.822918	4274	41.563843	3765	73.233566	6065	5.497135879407e-07	-1.56454403820712	down	--	--	Molecular Function: metal ion binding (GO:0046872);;	K15308|2.6e-173|lco:104928501|K15308 tristetraprolin | (RefSeq) mRNA decay activator protein ZFP36	--	[R]	General function prediction only	Zinc finger C-x8-C-x5-C-x3-H type (and similar)	mRNA decay activator protein ZFP36L2-A OS=Xenopus laevis OX=8355 GN=zfp36l2-A PE=1 SV=1	S	Function unknown	mRNA decay activator protein ZFP36L2 [Collichthys lucidus]	molecular function: binding (GO:0005488)
gene-jund	jund	169.322159	9627	170.561279	10023	82.874275	5874	39.883698	2667	47.056957	3323	51.78886	3343	0.00122885013472848	-1.27172039030138	down	--	--	Molecular Function: DNA binding (GO:0003677);; Molecular Function: transcription factor activity, sequence-specific DNA binding (GO:0003700);; Cellular Component: nucleus (GO:0005634);; Biological Process: regulation of transcription from RNA polymerase II promoter (GO:0006357);;	K04449|4.4e-149|lco:104920973|K04449 transcription factor jun-D | (RefSeq) transcription factor jun-D	MAPK signaling pathway (ko04010)	[K]	Transcription	Jun-like transcription factor	Transcription factor AP-1 OS=Serinus canaria OX=9135 GN=JUN PE=2 SV=1	K	Transcription	transcription factor jun-D [Larimichthys crocea]	molecular function: binding (GO:0005488);; biological process: biological regulation (GO:0065007);; molecular function: nucleic acid binding transcription factor activity (GO:0001071);; cellular component: cell (GO:0005623);; cellular component: organelle (GO:0043226);; cellular component: cell part (GO:0044464)
gene-LOC119888722	LOC119888722	12.227023	2131	24.223347	4363	6.676402	1450	3.16814	650	3.212585	696	5.336089	1056	0.00771032579804631	-1.36225042447466	down	[R]	General function prediction only	Molecular Function: molecular_function (GO:0003674);; Molecular Function: nucleic acid binding (GO:0003676);; Molecular Function: RNA binding (GO:0003723);; Molecular Function: binding (GO:0005488);; Molecular Function: protein binding (GO:0005515);; Cellular Component: cellular_component (GO:0005575);; Cellular Component: intracellular (GO:0005622);; Cellular Component: cell (GO:0005623);; Cellu…	K23213|3.2e-243|gja:107121681|K23213 paired amphipathic helix protein Sin3b | (RefSeq) NACHT domain- and WD repeat-containing protein 1-like	--	[R]	General function prediction only	NACHT domain	--	S	Function unknown	NACHT domain- and WD repeat-containing protein 1 [Epinephelus lanceolatus]	molecular function: binding (GO:0005488);; cellular component: cell (GO:0005623);; cellular component: cell part (GO:0044464);; cellular component: organelle (GO:0043226);; cellular component: macromolecular complex (GO:0032991);; cellular component: organelle part (GO:0044422);; biological process: metabolic process (GO:0008152);; biological process: cellular process (GO:0009987)
Micropterus_salmoides_newGene_4216	--	6.2177	445	4.272318	316	0.313048	28	0.31678	27	0.11472	11	0.436519	36	0.00521700612528036	-1.68140631256089	down	--	--	--	K22614|1.7e-15|sdu:111226132|K22614 NLR family CARD domain-containing protein 3 | (RefSeq) LOW QUALITY PROTEIN: NACHT, LRR and PYD domains-containing protein 12-like	--	--	--	--	--	S	Function unknown	NLR family CARD domain-containing protein 3-like [Seriola lalandi dorsalis]	--
gene-LOC119906714	LOC119906714	1.408329	127	1.906938	178	0.790323	89	0.401099	43	0.267686	30	0.397838	41	0.00634253632564914	-1.39196539239988	down	--	--	Molecular Function: DNA binding (GO:0003677);; Molecular Function: transcription factor activity, sequence-specific DNA binding (GO:0003700);; Cellular Component: nucleus (GO:0005634);;	K09052|3.3e-37|csem:103377038|K09052 cAMP response element modulator | (RefSeq) crem; cAMP-responsive element modulator	Adrenergic signaling in cardiomyocytes (ko04261)	[K]	Transcription	bZIP transcription factor	--	K	Transcription	cAMP-responsive element modulator-like isoform X2 [Sparus aurata]	molecular function: binding (GO:0005488);; biological process: biological regulation (GO:0065007);; molecular function: nucleic acid binding transcription factor activity (GO:0001071);; cellular component: cell (GO:0005623);; cellular component: organelle (GO:0043226);; cellular component: cell part (GO:0044464)
gene-junbb	junbb	558.458801	29233	572.056946	30952	275.960724	18007	35.035206	2157	25.946627	1687	64.169098	3814	8.57715902225382e-15	-2.78790486351999	down	--	--	Biological Process: lymph vessel development (GO:0001945);; Molecular Function: DNA binding (GO:0003677);; Molecular Function: transcription factor activity, sequence-specific DNA binding (GO:0003700);; Cellular Component: nucleus (GO:0005634);; Biological Process: regulation of transcription from RNA polymerase II promoter (GO:0006357);; Biological Process: fin regeneration (GO:0031101);; Biolog…	K09028|8.0e-178|lcf:108898682|K09028 transcription factor jun-B | (RefSeq) transcription factor jun-B-like	--	[K]	Transcription	Jun-like transcription factor	Transcription factor jun-B OS=Cyprinus carpio OX=7962 GN=junb PE=2 SV=1	K	Transcription	PREDICTED: transcription factor jun-B-like [Lates calcarifer]	biological process: developmental process (GO:0032502);; biological process: single-organism process (GO:0044699);; molecular function: binding (GO:0005488);; biological process: biological regulation (GO:0065007);; molecular function: nucleic acid binding transcription factor activity (GO:0001071);; cellular component: cell (GO:0005623);; cellular component: organelle (GO:0043226);; cellular com…
gene-fosb	fosb	39.447102	6753	40.771543	7225	15.987917000000001	3410	0.208786	43	0.093294	20	0.282256	56	6.98163460302365e-50	-5.46949707705514	down	--	--	Molecular Function: DNA binding (GO:0003677);; Molecular Function: transcription factor activity, sequence-specific DNA binding (GO:0003700);; Cellular Component: nucleus (GO:0005634);; Biological Process: regulation of transcription from RNA polymerase II promoter (GO:0006357);;	K09029|7.5e-195|mze:101478361|K09029 protein FosB | (RefSeq) fosb; protein fosB isoform X1	--	[K]	Transcription	bZIP transcription factor	Proto-oncogene c-Fos OS=Gallus gallus OX=9031 GN=FOS PE=1 SV=1	K	Transcription	PREDICTED: protein fosB isoform X1 [Stegastes partitus]	molecular function: binding (GO:0005488);; biological process: biological regulation (GO:0065007);; molecular function: nucleic acid binding transcription factor activity (GO:0001071);; cellular component: cell (GO:0005623);; cellular component: organelle (GO:0043226);; cellular component: cell part (GO:0044464)
gene-LOC119894925	LOC119894925	1.055522	35	1.19596	41	5.742794	237	0.025716	1	0.192544	8	0.05292	2	0.000975932904508105	-1.88712066470737	down	--	--	Molecular Function: virus receptor activity (GO:0001618);; Molecular Function: molecular_function (GO:0003674);; Molecular Function: binding (GO:0005488);; Molecular Function: protein binding (GO:0005515);; Cellular Component: cellular_component (GO:0005575);; Cellular Component: cell (GO:0005623);; Cellular Component: plasma membrane (GO:0005886);; Cellular Component: cell-cell junction (GO:0005…	K06087|1.3e-99|lco:104925792|K06087 claudin | (RefSeq) claudin-4	Cell adhesion molecules (ko04514);; Tight junction (ko04530)	--	--	PMP-22/EMP/MP20/Claudin family	Claudin-like protein ZF-A89 OS=Danio rerio OX=7955 GN=cldnd PE=2 SV=1	S	Function unknown	claudin b [Scophthalmus maximus]	molecular function: molecular transducer activity (GO:0060089);; molecular function: binding (GO:0005488);; cellular component: cell (GO:0005623);; cellular component: membrane (GO:0016020);; cellular component: cell part (GO:0044464);; cellular component: cell junction (GO:0030054);; biological process: biological adhesion (GO:0022610);; biological process: cellular process (GO:0009987);; cellul…
gene-zgc:171775	zgc:171775	3.903302	203	4.71218	253	2.450038	159	8.212845	502	9.647465	622	7.847032	463	0.00507488873035477	1.17417688231415	up	[O]	Posttranslational modification, protein turnover, chaperones	Molecular Function: MAP kinase activity (GO:0004707);; Molecular Function: ATP binding (GO:0005524);;	K04441|2.5e-196|sdu:111221298|K04441 p38 MAP kinase [EC:2.7.11.24] | (RefSeq) mitogen-activated protein kinase 14A-like	MAPK signaling pathway (ko04010);; FoxO signaling pathway (ko04068);; Oocyte meiosis (ko04114);; Cellular senescence (ko04218);; Adrenergic signaling in cardiomyocytes (ko04261);; VEGF signaling pathway (ko04370);; Toll-like receptor signaling pathway (ko04620);; NOD-like receptor signaling pathway (ko04621);; RIG-I-like receptor signaling pathway (ko04622);; C-type lectin receptor signaling path…	[T]	Signal transduction mechanisms	Protein kinase domain	Mitogen-activated protein kinase 14A OS=Cyprinus carpio OX=7962 GN=mapk14a PE=1 SV=1	T	Signal transduction mechanisms	mitogen-activated protein kinase 14A-like [Seriola dumerili]	biological process: metabolic process (GO:0008152);; biological process: cellular process (GO:0009987);; biological process: signaling (GO:0023052);; biological process: single-organism process (GO:0044699);; biological process: response to stimulus (GO:0050896);; biological process: biological regulation (GO:0065007);; molecular function: catalytic activity (GO:0003824);; molecular function: sig…
gene-LOC119917931	LOC119917931	320.598984	26219	184.42501	15497	105.291792	10717	726.299637	69822	642.3582160000001	64951	518.623703	48083	0.00190234033377994	1.4336856606534	up	[P]	Inorganic ion transport and metabolism	Cellular Component: integral component of plasma membrane (GO:0005887);; Biological Process: chloride transport (GO:0006821);; Molecular Function: secondary active sulfate transmembrane transporter activity (GO:0008271);; Molecular Function: anion:anion antiporter activity (GO:0015301);; Biological Process: bicarbonate transport (GO:0015701);;	K14078|0.0e+00|lcf:108897443|K14078 solute carrier family 26 (chloride anion exchanger), member 3 | (RefSeq) LOW QUALITY PROTEIN: chloride anion exchanger-like	--	[P]	Inorganic ion transport and metabolism	Sulfate permease family	Solute carrier family 26 member 9 OS=Xenopus tropicalis OX=8364 GN=slc26a9 PE=2 SV=1	P	Inorganic ion transport and metabolism	chloride anion exchanger-like [Morone saxatilis]	cellular component: cell (GO:0005623);; cellular component: membrane (GO:0016020);; cellular component: membrane part (GO:0044425);; cellular component: cell part (GO:0044464);; biological process: localization (GO:0051179);; biological process: single-organism process (GO:0044699);; molecular function: transporter activity (GO:0005215)
Micropterus_salmoides_newGene_429	--	14.511273000000001	816	15.537268000000001	980	16.905801	1306	32.666427	2402	41.64866399999999	3197	35.982528	2488	6.03880366895188e-06	1.30669435804511	up	[E]	Amino acid transport and metabolism	Molecular Function: folic acid binding (GO:0005542);; Molecular Function: transferase activity (GO:0016740);; Biological Process: cellular metabolic process (GO:0044237);;	K13990|1.4e-100|lcf:108874335|K13990 glutamate formiminotransferase / formiminotetrahydrofolate cyclodeaminase [EC:2.1.2.5 4.3.1.4] | (RefSeq) formimidoyltransferase-cyclodeaminase-like	Histidine metabolism (ko00340);; One carbon pool by folate (ko00670)	--	--	Formiminotransferase domain	Formimidoyltransferase-cyclodeaminase OS=Gallus gallus OX=9031 GN=FTCD PE=2 SV=1	E	Amino acid transport and metabolism	Formimidoyltransferase-cyclodeaminase [Larimichthys crocea]	molecular function: binding (GO:0005488);; molecular function: catalytic activity (GO:0003824);; biological process: metabolic process (GO:0008152);; biological process: cellular process (GO:0009987)
gene-LOC119906002	LOC119906002	160.276962	5407	113.916176	3972	80.765106	3397	1.779436	71	0.946812	40	2.65726	102	7.6790240455657e-48	-4.86655548801829	down	--	--	--	K23284|7.4e-113|lcf:108891676|K23284 C1q-related factor | (RefSeq) uncharacterized protein LOC108891676	--	--	--	C1q domain	--	S	Function unknown	PREDICTED: uncharacterized protein LOC108891676 [Lates calcarifer]	--
gene-spry4	spry4	5.549575	765	2.974136	424	6.086741	1046	1.46853	239	1.748975	300	1.505685	236	0.00264892457456293	-1.25796718630263	down	--	--	Biological Process: multicellular organism development (GO:0007275);; Cellular Component: membrane (GO:0016020);; Biological Process: negative regulation of ERK1 and ERK2 cascade (GO:0070373);;	K17385|3.5e-201|lco:104917780|K17385 protein sprouty homolog 4 | (RefSeq) spry4; protein sprouty homolog 4	--	--	--	Sprouty protein (Spry)	Protein sprouty homolog 2 OS=Gallus gallus OX=9031 GN=SPRY2 PE=2 SV=1	S	Function unknown	protein sprouty homolog 4 [Morone saxatilis]	biological process: multicellular organismal process (GO:0032501);; biological process: developmental process (GO:0032502);; biological process: single-organism process (GO:0044699);; cellular component: membrane (GO:0016020);; biological process: biological regulation (GO:0065007)
gene-LOC119913085	LOC119913085	0.960737	44	0.889029	42	1.100969	62	4.736845	251	2.1267	119	6.072154	311	3.87768003768972e-05	1.76650871055612	up	--	--	--	K11969|9.4e-45|rro:104673094|K11969 ariadne-2 [EC:2.3.2.31] | (RefSeq) E3 ubiquitin-protein ligase ARIH2-like isoform X2	--	--	--	--	--	S	Function unknown	probable E3 ubiquitin-protein ligase RNF144A-A [Trematomus bernacchii]	--
gene-zgc:136870	zgc:136870	11.880163	839	14.73208	1076	14.203786	1251	3.79435	316	5.780178	507	2.44534	197	0.00520485979004332	-1.29535513772225	down	--	--	Molecular Function: GTP binding (GO:0005525);;	K11833|3.0e-13|salp:111949733|K11833 ubiquitin carboxyl-terminal hydrolase 2 [EC:3.4.19.12] | (RefSeq) ubiquitin carboxyl-terminal hydrolase 2	--	--	--	AIG1 family	--	S	Function unknown	GTPase IMAP family member 7-like [Epinephelus lanceolatus]	molecular function: binding (GO:0005488)
gene-lss	lss	0.771291	64	1.474985	126	0.792655	82	12.509724	1213	1.831794	188	3.326642	312	0.00392441128345439	1.65635465309516	up	[I]	Lipid transport and metabolism	Molecular Function: lanosterol synthase activity (GO:0000250);; Cellular Component: lipid droplet (GO:0005811);; Biological Process: triterpenoid biosynthetic process (GO:0016104);; Molecular Function: beta-amyrin synthase activity (GO:0042300);;	K01852|0.0e+00|sdu:111218455|K01852 lanosterol synthase [EC:5.4.99.7] | (RefSeq) lss; lanosterol synthase	Steroid biosynthesis (ko00100)	[I]	Lipid transport and metabolism	Squalene-hopene cyclase C-terminal domain	--	I	Lipid transport and metabolism	lanosterol synthase [Siniperca chuatsi]	molecular function: catalytic activity (GO:0003824);; cellular component: cell (GO:0005623);; cellular component: organelle (GO:0043226);; cellular component: cell part (GO:0044464);; biological process: metabolic process (GO:0008152);; biological process: cellular process (GO:0009987);; biological process: single-organism process (GO:0044699)
gene-LOC119909085	LOC119909085	13.902416	921	10.93553	749	6.869168	567	2.550024	199	3.269633	269	3.530747	266	0.000311982029667655	-1.39334806115205	down	--	--	Biological Process: response to acid chemical (GO:0001101);; Biological Process: skeletal system development (GO:0001501);; Biological Process: cartilage condensation (GO:0001502);; Biological Process: ossification (GO:0001503);; Biological Process: angiogenesis (GO:0001525);; Biological Process: blood vessel development (GO:0001568);; Biological Process: tissue homeostasis (GO:0001894);; Biologi…	K06827|2.2e-210|lcf:108896884|K06827 connective tissue growth factor | (RefSeq) ctgf; connective tissue growth factor	Apelin signaling pathway (ko04371)	--	--	CCN3 Nov like TSP1 domain	CCN family member 3 OS=Gallus gallus OX=9031 GN=CCN3 PE=2 SV=1	W	Extracellular structures	CCN family member 2 [Sparus aurata]	biological process: response to stimulus (GO:0050896);; biological process: multicellular organismal process (GO:0032501);; biological process: developmental process (GO:0032502);; biological process: single-organism process (GO:0044699);; biological process: cell aggregation (GO:0098743);; biological process: biological regulation (GO:0065007);; molecular function: binding (GO:0005488);; cellula…
gene-nectin4b	nectin4b	5.968478	433	5.08569	382	5.631164	507	11.710788	997	11.385448	1026	11.230777	925	1.31464648951279e-05	1.10966899068702	up	--	--	Biological Process: cell adhesion (GO:0007155);; Cellular Component: integral component of membrane (GO:0016021);; Biological Process: viral entry into host cell (GO:0046718);;	K06593|5.0e-220|lco:104936432|K06593 poliovirus receptor-related 4 | (RefSeq) nectin-4 isoform X1	Adherens junction (ko04520)	--	--	Immunoglobulin domain	--	T	Signal transduction mechanisms	nectin-4-like [Perca flavescens]	biological process: biological adhesion (GO:0022610);; cellular component: membrane (GO:0016020);; cellular component: membrane part (GO:0044425);; biological process: multi-organism process (GO:0051704)
gene-LOC119916056	LOC119916056	1.876716	404	2.549651	567	0.184315	50	0.027707	8	0.018382	5	0.065473	16	1.24759470621437e-06	-2.48830077432562	down	--	--	Molecular Function: ATP binding (GO:0005524);;	K22614|0.0e+00|lcf:108877195|K22614 NLR family CARD domain-containing protein 3 | (RefSeq) LOW QUALITY PROTEIN: protein NLRC3-like	--	[S]	Function unknown	NLRC4 helical domain HD2	Neoverrucotoxin subunit alpha OS=Synanceia verrucosa OX=51996 PE=1 SV=1	O	Posttranslational modification, protein turnover, chaperones	LOW QUALITY PROTEIN: NLR family CARD domain-containing protein 3 [Larimichthys crocea]	molecular function: binding (GO:0005488)
gene-glis3	glis3	0.8807269999999999	104	0.959436	116	1.7176580000000001	241	0.116682	16	0.079991	12	0.235533	32	3.78739629807345e-06	-2.1171165273329	down	--	--	Biological Process: syncytium formation by plasma membrane fusion (GO:0000768);; Molecular Function: RNA polymerase II transcription factor activity, sequence-specific DNA binding (GO:0000981);; Molecular Function: molecular_function (GO:0003674);; Molecular Function: nucleic acid binding (GO:0003676);; Molecular Function: transcription factor activity, sequence-specific DNA binding (GO:0003700);…	K09232|0.0e+00|lcf:108888965|K09232 zinc finger protein GLIS1/3 | (RefSeq) LOW QUALITY PROTEIN: zinc finger protein GLIS3-like	--	[R]	General function prediction only	Zinc finger, C2H2 type	Zinc finger protein GLI4 OS=Xenopus laevis OX=8355 GN=gli4 PE=2 SV=1	S	Function unknown	zinc finger protein GLIS3 isoform X1 [Morone saxatilis]	biological process: cellular process (GO:0009987);; biological process: developmental process (GO:0032502);; biological process: single-organism process (GO:0044699);; biological process: biological regulation (GO:0065007);; molecular function: nucleic acid binding transcription factor activity (GO:0001071);; molecular function: binding (GO:0005488);; cellular component: cell (GO:0005623);; cellu…
gene-phf21b	phf21b	1.9983609999999998	408	3.015571	635	3.259962	827	0.417037	100	0.677868	172	1.097199	254	0.000673191968537673	-1.47631286614087	down	--	--	--	K23437|2.5e-12|tca:663775|K23437 cytosolic carboxypeptidase protein 2/3 [EC:3.4.17.-] | (RefSeq) uncharacterized LOC663775	--	[R]	General function prediction only	PHD-finger	--	--	--	PHD finger protein 21B isoform X3 [Echeneis naucrates]	--
gene-csrnp1b	csrnp1b	27.084845	1543	23.2997	1372	38.445358	2731	4.891801	328	10.92747	774	5.649679	366	0.000976412038980708	-1.50129117379599	down	--	--	--	K17494|9.4e-291|lco:104937158|K17494 cysteine/serine-rich nuclear protein | (RefSeq) cysteine/serine-rich nuclear protein 1	--	[R]	General function prediction only	Cysteine/serine-rich nuclear protein N-terminus	--	S	Function unknown	cysteine/serine-rich nuclear protein 1b [Epinephelus lanceolatus]	--
gene-wu:fl23c11	wu:fl23c11	4.395174	408	3.411686	327	2.751474	318	9.734969	1062	9.386858	1081	5.984557	630	0.00384076818221015	1.207089861925	up	--	--	Molecular Function: molecular_function (GO:0003674);; Molecular Function: transmembrane signaling receptor activity (GO:0004888);; Molecular Function: cytokine receptor activity (GO:0004896);; Cellular Component: cellular_component (GO:0005575);; Cellular Component: cell (GO:0005623);; Cellular Component: plasma membrane (GO:0005886);; Cellular Component: integral component of plasma membrane (GO…	K05166|3.3e-296|sdu:111217346|K05166 interleukin 17 receptor C | (RefSeq) uncharacterized protein LOC111217346 isoform X1	Cytokine-cytokine receptor interaction (ko04060)	--	--	Interleukin-17 receptor extracellular region	--	T	Signal transduction mechanisms	uncharacterized protein wu:fl23c11 [Morone saxatilis]	biological process: cellular process (GO:0009987);; biological process: signaling (GO:0023052);; biological process: single-organism process (GO:0044699);; biological process: response to stimulus (GO:0050896);; biological process: biological regulation (GO:0065007);; molecular function: signal transducer activity (GO:0004871);; molecular function: molecular transducer activity (GO:0060089);; cel…
gene-LOC119886689	LOC119886689	1.023215	45	0.421027	19	0.407251	22	4.480912	228	7.526309	403	1.263924	62	0.00207008609015633	1.76722685216268	up	[I]	Lipid transport and metabolism	Molecular Function: fatty-acyl-CoA binding (GO:0000062);; Molecular Function: catalytic activity (GO:0003824);;	K13239|3.8e-171|mze:101479979|K13239 Delta3-Delta2-enoyl-CoA isomerase [EC:5.3.3.8] | (RefSeq) eci2; enoyl-CoA delta isomerase 2, mitochondrial	Fatty acid degradation (ko00071);; Peroxisome (ko04146)	[I]	Lipid transport and metabolism	Enoyl-CoA hydratase/isomerase	Acyl-CoA-binding domain-containing protein 5 OS=Xenopus tropicalis OX=8364 GN=acbd5 PE=2 SV=1	I	Lipid transport and metabolism	PREDICTED: enoyl-CoA delta isomerase 2, mitochondrial [Stegastes partitus]	molecular function: binding (GO:0005488);; molecular function: catalytic activity (GO:0003824)
gene-fmnl2a	fmnl2a	5.499274999999999	910	6.583298	1143	7.469786999999999	1478	2.008644	387	2.86154	556	3.345999	617	0.00268970023664473	-1.03717115796173	down	--	--	Molecular Function: actin binding (GO:0003779);; Biological Process: cellular component organization (GO:0016043);; Molecular Function: Rho GTPase binding (GO:0017048);; Biological Process: actin cytoskeleton organization (GO:0030036);;	K04512|5.3e-64|phyp:113534011|K04512 dishevelled associated activator of morphogenesis | (RefSeq) disheveled-associated activator of morphogenesis 1-like	Wnt signaling pathway (ko04310)	[TZ]	Signal transduction mechanisms;; Cytoskeleton	Formin Homology 2 Domain	Formin-like protein 3 OS=Danio rerio OX=7955 GN=fmnl3 PE=2 SV=2	--	--	formin-like protein 2 isoform X1 [Seriola dumerili]	molecular function: binding (GO:0005488);; biological process: cellular process (GO:0009987);; biological process: cellular component organization or biogenesis (GO:0071840);; biological process: single-organism process (GO:0044699)
gene-LOC119888646	LOC119888646	2.051627	287	2.101983	309	1.837315	325	0.60815	101	0.745136	130	1.006357	162	0.0024729364959908	-1.09052328640471	down	[T]	Signal transduction mechanisms	Molecular Function: protein tyrosine phosphatase activity (GO:0004725);; Molecular Function: protein tyrosine/serine/threonine phosphatase activity (GO:0008138);;	K06639|1.1e-302|sdu:111236223|K06639 cell division cycle 14 [EC:3.1.3.16 3.1.3.48] | (RefSeq) cdc14a; dual specificity protein phosphatase CDC14A isoform X1	Cell cycle (ko04110)	[V]	Defense mechanisms	Dual specificity protein phosphatase, N-terminal half	Dual specificity protein phosphatase CDC14AB OS=Danio rerio OX=7955 GN=cdc14ab PE=3 SV=1	V	Defense mechanisms	dual specificity protein phosphatase CDC14AB isoform X1 [Epinephelus lanceolatus]	biological process: metabolic process (GO:0008152);; biological process: cellular process (GO:0009987);; molecular function: catalytic activity (GO:0003824)
gene-egr1	egr1	98.077995	9430	85.411552	8488	55.951111	6706	8.105614	917	4.233364	506	14.36858	1569	5.85180074056678e-11	-2.48791081612079	down	--	--	Molecular Function: DNA binding (GO:0003677);; Cellular Component: nucleus (GO:0005634);; Molecular Function: metal ion binding (GO:0046872);; Biological Process: embryonic viscerocranium morphogenesis (GO:0048703);; Biological Process: embryonic retina morphogenesis in camera-type eye (GO:0060059);;	K09203|2.3e-200|lcf:108882957|K09203 early growth response protein 1 | (RefSeq) LOW QUALITY PROTEIN: early growth response protein 1-like	Apelin signaling pathway (ko04371);; GnRH signaling pathway (ko04912)	[R]	General function prediction only	Domain of unknown function (DUF3432)	Early growth response protein 1 OS=Danio rerio OX=7955 GN=egr1 PE=2 SV=2	K	Transcription	early growth response protein 1 [Epinephelus lanceolatus]	molecular function: binding (GO:0005488);; cellular component: cell (GO:0005623);; cellular component: organelle (GO:0043226);; cellular component: cell part (GO:0044464);; biological process: multicellular organismal process (GO:0032501);; biological process: developmental process (GO:0032502);; biological process: single-organism process (GO:0044699)
gene-LOC119903097	LOC119903097	6.64888	974	7.309318	1098	4.499452	855	2.72207	497	2.149233	415	2.014815	356	0.00321525084134453	-1.0752400474556	down	--	--	Molecular Function: ATP binding (GO:0005524);;	K22614|0.0e+00|lcf:108877195|K22614 NLR family CARD domain-containing protein 3 | (RefSeq) LOW QUALITY PROTEIN: protein NLRC3-like	--	--	--	Leucine Rich repeat	Stonustoxin subunit beta OS=Synanceia horrida OX=13279 PE=1 SV=3	S	Function unknown	protein NLRC3-like [Seriola dumerili]	molecular function: binding (GO:0005488)
gene-rdh12	rdh12	16.00672	904	9.829882	574	13.186199	929	47.325924	3144	24.425848	1714	29.926752	1919	0.000737153604567843	1.30956916367129	up	[IQR]	Lipid transport and metabolism;; Secondary metabolites biosynthesis, transport and catabolism;; General function prediction only	Biological Process: retinoid metabolic process (GO:0001523);; Biological Process: tissue homeostasis (GO:0001894);; Biological Process: retina homeostasis (GO:0001895);; Cellular Component: photoreceptor inner segment (GO:0001917);; Biological Process: system process (GO:0003008);; Molecular Function: molecular_function (GO:0003674);; Molecular Function: catalytic activity (GO:0003824);; Molecula…	K11153|1.1e-166|lco:104935572|K11153 retinol dehydrogenase 12 [EC:1.1.1.300] | (RefSeq) rdh12; retinol dehydrogenase 12	Retinol metabolism (ko00830)	[Q]	Secondary metabolites biosynthesis, transport and catabolism	short chain dehydrogenase	WW domain-containing oxidoreductase OS=Gallus gallus OX=9031 GN=WWOX PE=2 SV=2	Q	Secondary metabolites biosynthesis, transport and catabolism	retinol dehydrogenase 12 [Morone saxatilis]	biological process: metabolic process (GO:0008152);; biological process: cellular process (GO:0009987);; biological process: single-organism process (GO:0044699);; biological process: biological regulation (GO:0065007);; biological process: multicellular organismal process (GO:0032501);; cellular component: cell (GO:0005623);; cellular component: cell part (GO:0044464);; molecular function: catal…
gene-LOC119919289	LOC119919289	11.73097	402	13.117842	464	13.416461	572	67.931241	2731	31.934179	1355	30.154303000000002	1171	6.67259701479938e-05	1.59263236646291	up	--	--	Cellular Component: integral component of membrane (GO:0016021);; Biological Process: sterol metabolic process (GO:0016125);; Molecular Function: cholestenol delta-isomerase activity (GO:0047750);;	K01824|8.1e-132|sdu:111218949|K01824 cholestenol Delta-isomerase [EC:5.3.3.5] | (RefSeq) ebp; 3-beta-hydroxysteroid-Delta(8), Delta(7)-isomerase	Steroid biosynthesis (ko00100)	[I]	Lipid transport and metabolism	EXPERA (EXPanded EBP superfamily)	--	I	Lipid transport and metabolism	3-beta-hydroxysteroid-Delta(8),Delta(7)-isomerase-like [Morone saxatilis]	cellular component: membrane (GO:0016020);; cellular component: membrane part (GO:0044425);; biological process: metabolic process (GO:0008152);; biological process: single-organism process (GO:0044699);; molecular function: catalytic activity (GO:0003824)
gene-ier2a	ier2a	56.324253	3655	93.610909	6278	13.942571	1128	6.947359	531	4.725582	381	7.363033	543	2.47307227557982e-05	-2.06167384711847	down	--	--	Molecular Function: transcription regulatory region sequence-specific DNA binding (GO:0000976);; Molecular Function: RNA polymerase II regulatory region sequence-specific DNA binding (GO:0000977);; Molecular Function: RNA polymerase II transcription factor activity, sequence-specific DNA binding (GO:0000981);; Molecular Function: RNA polymerase II regulatory region DNA binding (GO:0001012);; Mole…	--	--	--	--	Immediate early response protein (IER)	Immediate early response gene 2 protein OS=Danio rerio OX=7955 GN=ier2 PE=1 SV=1	S	Function unknown	immediate early response gene 2 protein-like [Anarrhichthys ocellatus]	molecular function: binding (GO:0005488);; biological process: biological regulation (GO:0065007);; molecular function: nucleic acid binding transcription factor activity (GO:0001071);; cellular component: cell (GO:0005623);; cellular component: cell part (GO:0044464);; cellular component: organelle (GO:0043226);; cellular component: organelle part (GO:0044422);; biological process: metabolic pro…
gene-LOC119886241	LOC119886241	14.667669	1181	8.324088	693	10.377784	1042	1.388268	132	4.285347	429	2.148401	197	0.00509404337583958	-1.44323133823885	down	--	--	Molecular Function: transcription factor activity, sequence-specific DNA binding (GO:0003700);; Molecular Function: steroid hormone receptor activity (GO:0003707);; Cellular Component: nucleus (GO:0005634);; Molecular Function: zinc ion binding (GO:0008270);; Cellular Component: host cell nucleus (GO:0042025);; Molecular Function: sequence-specific DNA binding (GO:0043565);;	K03728|3.8e-292|lco:104929060|K03728 nuclear receptor subfamily 1 group D member 1 | (RefSeq) nuclear receptor subfamily 1 group D member 1	--	[T]	Signal transduction mechanisms	Zinc finger, C4 type (two domains)	Nuclear receptor ROR-alpha B OS=Danio rerio OX=7955 GN=rorab PE=2 SV=1	K	Transcription	nuclear receptor subfamily 1 group D member 1-like [Anabas testudineus]	biological process: biological regulation (GO:0065007);; molecular function: nucleic acid binding transcription factor activity (GO:0001071);; biological process: cellular process (GO:0009987);; biological process: signaling (GO:0023052);; biological process: single-organism process (GO:0044699);; biological process: response to stimulus (GO:0050896);; molecular function: signal transducer activi…
gene-LOC119905676	LOC119905676	28.965854999999998	1793	38.770793	2475	16.294115	1268	1.163295	84	3.327258	254	2.7051749999999997	189	5.16563703371815e-10	-2.58106223596046	down	--	--	Biological Process: regulation of cytokine production (GO:0001817);; Biological Process: negative regulation of cytokine production (GO:0001818);; Biological Process: regulation of protein phosphorylation (GO:0001932);; Biological Process: negative regulation of protein phosphorylation (GO:0001933);; Biological Process: vasculature development (GO:0001944);; Molecular Function: molecular_function…	K08886|9.8e-18|cmk:103183178|K08886 activated CDC42 kinase 1 [EC:2.7.10.2 2.7.11.1] | (RefSeq) tnk2; tyrosine kinase non receptor 2	--	--	--	--	--	T	Signal transduction mechanisms	ERBB receptor feedback inhibitor 1 [Morone saxatilis]	biological process: biological regulation (GO:0065007);; biological process: multicellular organismal process (GO:0032501);; biological process: developmental process (GO:0032502);; biological process: single-organism process (GO:0044699);; molecular function: molecular function regulator (GO:0098772);; molecular function: binding (GO:0005488);; cellular component: cell (GO:0005623);; cellular co…
gene-erg28	erg28	23.234751	712	17.65036	559	12.296325	470	110.346992	3975	40.966553	1558	45.707188	1590	0.000619080060147234	1.58851109188673	up	--	--	Cellular Component: integral component of membrane (GO:0016021);;	--	--	[S]	Function unknown	Erg28 like protein	--	S	Function unknown	PREDICTED: probable ergosterol biosynthetic protein 28 [Lates calcarifer]	cellular component: membrane (GO:0016020);; cellular component: membrane part (GO:0044425)
gene-elnb	elnb	0.272148	65	0.51449	123	0.411859	124	0.038059	11	0.024276	8	0.011733	4	3.024369810595e-08	-2.53392510783277	down	--	--	--	--	--	--	--	--	--	S	Function unknown	fibroin heavy chain-like [Perca flavescens]	--
gene-amy2a	amy2a	49.324257	2410	16.990191	858	42.824989	2609	4.331775	249	3.220437	196	2.599885	145	6.98605044184701e-11	-2.57624637204414	down	[G]	Carbohydrate transport and metabolism	Molecular Function: alpha-amylase activity (GO:0004556);; Biological Process: carbohydrate metabolic process (GO:0005975);; Molecular Function: cation binding (GO:0043169);; Molecular Function: alpha-amylase activity (releasing maltohexaose) (GO:0103025);;	K01176|1.4e-293|sdu:111231265|K01176 alpha-amylase [EC:3.2.1.1] | (RefSeq) pancreatic alpha-amylase-like	Starch and sucrose metabolism (ko00500)	[G]	Carbohydrate transport and metabolism	Alpha amylase, C-terminal all-beta domain	Alpha-amylase OS=Oryzias latipes OX=8090 PE=1 SV=1	G	Carbohydrate transport and metabolism	PREDICTED: pancreatic alpha-amylase-like isoform X2 [Lates calcarifer]	molecular function: catalytic activity (GO:0003824);; biological process: metabolic process (GO:0008152);; molecular function: binding (GO:0005488)
gene-fosl1a	fosl1a	6.527262	399	6.340776	401	4.350519	332	0.335839	25	0.125211	10	0.246645	18	6.06386328348624e-24	-3.57383381993947	down	--	--	Molecular Function: DNA binding (GO:0003677);; Molecular Function: transcription factor activity, sequence-specific DNA binding (GO:0003700);; Cellular Component: nucleus (GO:0005634);; Biological Process: regulation of transcription from RNA polymerase II promoter (GO:0006357);;	K09030|1.9e-129|lco:104931557|K09030 fos-like antigen 2 | (RefSeq) fosl1; fos-related antigen 1	--	[K]	Transcription	bZIP transcription factor	Proto-oncogene c-Fos OS=Gallus gallus OX=9031 GN=FOS PE=1 SV=1	K	Transcription	fos-related antigen 1 isoform X1 [Labrus bergylta]	molecular function: binding (GO:0005488);; biological process: biological regulation (GO:0065007);; molecular function: nucleic acid binding transcription factor activity (GO:0001071);; cellular component: cell (GO:0005623);; cellular component: organelle (GO:0043226);; cellular component: cell part (GO:0044464)
gene-slc4a1a	slc4a1a	1.505772	176	6.927767	837	2.050079	299	0.823863	114	0.678234	99	0.493423	66	0.00885717481370269	-1.50194325554181	down	--	--	Molecular Function: inorganic anion exchanger activity (GO:0005452);; Cellular Component: integral component of membrane (GO:0016021);; Biological Process: erythrocyte differentiation (GO:0030218);; Biological Process: embryonic hemopoiesis (GO:0035162);;	K06573|0.0e+00|lcf:108880563|K06573 solute carrier family 4 (anion exchanger), member 1 | (RefSeq) LOW QUALITY PROTEIN: band 3 anion exchange protein-like	--	[P]	Inorganic ion transport and metabolism	HCO3- transporter family	Band 3 anion exchange protein OS=Oncorhynchus mykiss OX=8022 GN=slc4a1 PE=2 SV=2	P	Inorganic ion transport and metabolism	solute carrier family 4 member 1a (Diego blood group) isoform X2 [Morone saxatilis]	biological process: localization (GO:0051179);; molecular function: transporter activity (GO:0005215);; cellular component: membrane (GO:0016020);; cellular component: membrane part (GO:0044425);; biological process: immune system process (GO:0002376);; biological process: cellular process (GO:0009987);; biological process: multicellular organismal process (GO:0032501);; biological process: devel…
gene-rhpn2	rhpn2	18.512629	2247	15.358160999999999	1924	23.616382	3582	4.6287780000000005	661	5.648413	850	7.572941	1042	8.47388959248422e-06	-1.405877730954	down	--	--	Biological Process: signal transduction (GO:0007165);;	K18040|1.8e-30|amex:103026294|K18040 tyrosine-protein phosphatase non-receptor type 23 [EC:3.1.3.48] | (RefSeq) ptpn23; tyrosine-protein phosphatase non-receptor type 23 isoform X1	--	[R]	General function prediction only	BRO1-like domain	Rhophilin-2 OS=Danio rerio OX=7955 GN=rhpn2 PE=2 SV=1	S	Function unknown	rhophilin-2 isoform X2 [Morone saxatilis]	biological process: cellular process (GO:0009987);; biological process: biological regulation (GO:0065007)
gene-LOC119901008	LOC119901008	91.271049	8539	35.162155	3401	30.678545	3578	351.704987	38697	130.063599	15112	168.881485	17939	0.00176046267009021	1.60366045217731	up	[P]	Inorganic ion transport and metabolism	Molecular Function: N,N-dimethylaniline monooxygenase activity (GO:0004499);; Cellular Component: endoplasmic reticulum membrane (GO:0005789);; Molecular Function: flavin adenine dinucleotide binding (GO:0050660);; Molecular Function: NADP binding (GO:0050661);;	K00485|6.5e-297|mze:101470927|K00485 dimethylaniline monooxygenase (N-oxide forming) [EC:1.14.13.8] | (RefSeq) dimethylaniline monooxygenase [N-oxide-forming] 5	Drug metabolism - cytochrome P450 (ko00982)	[Q]	Secondary metabolites biosynthesis, transport and catabolism	Flavin-binding monooxygenase-like	--	Q	Secondary metabolites biosynthesis, transport and catabolism	dimethylaniline monooxygenase [N-oxide-forming] 5-like [Parambassis ranga]	biological process: metabolic process (GO:0008152);; biological process: single-organism process (GO:0044699);; molecular function: catalytic activity (GO:0003824);; cellular component: cell (GO:0005623);; cellular component: membrane (GO:0016020);; cellular component: organelle (GO:0043226);; cellular component: organelle part (GO:0044422);; cellular component: membrane part (GO:0044425);; cellu…
gene-ptgs2b	ptgs2b	1.09961	80	1.542356	116	0.908215	82	0.298983	26	0.243118	22	0.278954	23	0.00107167629707731	-1.53982857073585	down	[QV]	Secondary metabolites biosynthesis, transport and catabolism;; Defense mechanisms	Molecular Function: peroxidase activity (GO:0004601);; Molecular Function: prostaglandin-endoperoxide synthase activity (GO:0004666);; Biological Process: inflammatory response (GO:0006954);; Biological Process: response to oxidative stress (GO:0006979);; Biological Process: regulation of blood pressure (GO:0008217);; Biological Process: cyclooxygenase pathway (GO:0019371);; Molecular Function: h…	K11987|0.0e+00|sdu:111219627|K11987 prostaglandin-endoperoxide synthase 2 [EC:1.14.99.1] | (RefSeq) ptgs2; prostaglandin G/H synthase 2	Arachidonic acid metabolism (ko00590);; VEGF signaling pathway (ko04370);; C-type lectin receptor signaling pathway (ko04625)	[R]	General function prediction only	Animal haem peroxidase	Prostaglandin G/H synthase 2 OS=Gallus gallus OX=9031 GN=PTGS2 PE=2 SV=1	T	Signal transduction mechanisms	cyclooxygenase 2 [Oplegnathus fasciatus]	biological process: metabolic process (GO:0008152);; biological process: cellular process (GO:0009987);; biological process: single-organism process (GO:0044699);; biological process: response to stimulus (GO:0050896);; biological process: detoxification (GO:0098754);; molecular function: catalytic activity (GO:0003824);; molecular function: antioxidant activity (GO:0016209);; biological process:…
gene-LOC119900524	LOC119900524	4.702055	368	5.644184	376	7.587316	718	0.297443	28	0.458094	45	0.710801	48	1.55108699471751e-18	-2.97524917829984	down	--	--	--	K12475|8.2e-128|sdu:111236903|K12475 disabled homolog 2 | (RefSeq) disabled homolog 2-like	Endocytosis (ko04144)	[T]	Signal transduction mechanisms	--	--	T	Signal transduction mechanisms	hypothetical protein PFLUV_G00108900 [Perca fluviatilis]	--
gene-LOC119884428	LOC119884428	0.167498	6	0.0	0	0.059564	3	1.156548	44	1.241815	50	1.042859	39	0.00107167629707731	1.87399437903542	up	[S]	Function unknown	Molecular Function: calcium-dependent cysteine-type endopeptidase activity (GO:0004198);; Biological Process: proteolysis (GO:0006508);;	K08579|2.8e-178|lco:104935098|K08579 calpain-10 [EC:3.4.22.-] | (RefSeq) capn10; calpain-10	--	[OT]	Posttranslational modification, protein turnover, chaperones;; Signal transduction mechanisms	Calpain family cysteine protease	Calpain-3 OS=Gallus gallus OX=9031 GN=CAPN3 PE=2 SV=1	--	--	calpain-10 isoform X1 [Sander lucioperca]	biological process: metabolic process (GO:0008152);; molecular function: catalytic activity (GO:0003824)
gene-LOC119902666	LOC119902666	68.295967	3701	76.956619	4310	19.244459	1300	10.03418	640	10.872887	732	6.865623	423	0.00025018653225402	-1.77686845618526	down	--	--	Molecular Function: transcription factor activity, sequence-specific DNA binding (GO:0003700);; Cellular Component: nucleus (GO:0005634);; Biological Process: regulation of transcription, DNA-templated (GO:0006355);; Molecular Function: protein dimerization activity (GO:0046983);;	K04377|1.6e-148|sdu:111239852|K04377 Myc proto-oncogene protein | (RefSeq) transcriptional regulator Myc-like isoform X1	MAPK signaling pathway (ko04010);; ErbB signaling pathway (ko04012);; Cell cycle (ko04110);; Cellular senescence (ko04218);; Wnt signaling pathway (ko04310);; TGF-beta signaling pathway (ko04350);; Salmonella infection (ko05132)	--	--	Myc amino-terminal region	Transcriptional regulator Myc-A OS=Danio rerio OX=7955 GN=myca PE=2 SV=2	K	Transcription	transcriptional regulator Myc-B-like isoform X2 [Sparus aurata]	biological process: biological regulation (GO:0065007);; molecular function: nucleic acid binding transcription factor activity (GO:0001071);; cellular component: cell (GO:0005623);; cellular component: organelle (GO:0043226);; cellular component: cell part (GO:0044464);; molecular function: binding (GO:0005488)
gene-LOC119918720	LOC119918720	3.475303	161	2.846783	137	5.550904	320	9.025423	491	6.948309	400	10.791009	567	0.00786016810042633	1.1140538799952	up	[V]	Defense mechanisms	Molecular Function: antiporter activity (GO:0015297);; Cellular Component: integral component of membrane (GO:0016021);; Molecular Function: xenobiotic transporter activity (GO:0042910);;	K03327|4.4e-214|lcf:108893800|K03327 multidrug resistance protein, MATE family | (RefSeq) multidrug and toxin extrusion protein 1-like	--	[R]	General function prediction only	MatE	Multidrug and toxin extrusion protein 1 OS=Danio rerio OX=7955 GN=slc47a1 PE=2 SV=1	V	Defense mechanisms	multidrug and toxin extrusion protein 1 [Morone saxatilis]	biological process: localization (GO:0051179);; molecular function: transporter activity (GO:0005215);; cellular component: membrane (GO:0016020);; cellular component: membrane part (GO:0044425)
gene-ppp1r15b	ppp1r15b	56.0886	4447	54.620613	4476	42.142544	4165	11.012049	1027	12.965885	1277	9.566851	862	1.94766806575876e-10	-1.83459969185548	down	--	--	--	K17558|1.6e-258|sdu:111229669|K17558 protein phosphatase 1 regulatory subunit 15B | (RefSeq) protein phosphatase 1 regulatory subunit 15A-like	--	--	--	Phosphatase-1 catalytic subunit binding region	--	S	Function unknown	protein phosphatase 1 regulatory subunit 15A-like [Seriola lalandi dorsalis]	--
Micropterus_salmoides_newGene_1399	--	24.713995999999998	1140	17.016109	832	10.935327000000001	588	4.557286	210	4.341634	264	2.675347	150	0.000118563814495299	-1.65248697933312	down	--	--	--	K17270|4.1e-38|lco:109138210|K17270 myelin-oligodendrocyte glycoprotein | (RefSeq) myelin-oligodendrocyte glycoprotein-like isoform X1	--	--	--	Immunoglobulin V-set domain	--	--	--	CD276 antigen-like protein Precursor [Larimichthys crocea]	--
gene-LOC119913031	LOC119913031	2.441569	72	3.501298	106	1.399232	51	0.15602	6	0.106073	4	0.127311	5	3.50175946886142e-07	-2.46281217642105	down	--	--	Biological Process: response to acid chemical (GO:0001101);; Cellular Component: cellular_component (GO:0005575);; Cellular Component: cell (GO:0005623);; Cellular Component: plasma membrane (GO:0005886);; Biological Process: multicellular organism development (GO:0007275);; Biological Process: nervous system development (GO:0007399);; Biological Process: central nervous system development (GO:00…	K17270|8.5e-68|lco:104937830|K17270 myelin-oligodendrocyte glycoprotein | (RefSeq) myelin-oligodendrocyte glycoprotein-like isoform X1	--	--	--	Immunoglobulin V-set domain	--	S	Function unknown	myelin-oligodendrocyte glycoprotein-like [Morone saxatilis]	biological process: response to stimulus (GO:0050896);; cellular component: cell (GO:0005623);; cellular component: membrane (GO:0016020);; cellular component: cell part (GO:0044464);; biological process: multicellular organismal process (GO:0032501);; biological process: developmental process (GO:0032502);; biological process: single-organism process (GO:0044699);; cellular component: membrane p…
gene-LOC119894165	LOC119894165	15.027883	663	13.399984	611	13.931036	766	3.315825	172	2.223742	122	3.332617	167	4.06110103592431e-15	-1.96713485688887	down	--	--	Molecular Function: cyclin-dependent protein serine/threonine kinase inhibitor activity (GO:0004861);; Cellular Component: nucleus (GO:0005634);; Biological Process: cell cycle arrest (GO:0007050);; Biological Process: regulation of mitotic cell cycle (GO:0007346);;	K09993|2.0e-100|lcf:108883053|K09993 cyclin-dependent kinase inhibitor 1C | (RefSeq) cyclin-dependent kinase inhibitor 1C-like	Cell cycle (ko04110)	[T]	Signal transduction mechanisms	Cyclin-dependent kinase inhibitor	--	T	Signal transduction mechanisms	cyclin-dependent kinase inhibitor 1C [Morone saxatilis]	biological process: biological regulation (GO:0065007);; molecular function: molecular function regulator (GO:0098772);; cellular component: cell (GO:0005623);; cellular component: organelle (GO:0043226);; cellular component: cell part (GO:0044464);; biological process: cellular process (GO:0009987);; biological process: single-organism process (GO:0044699)
gene-LOC119893729	LOC119893729	31.125301	2255	27.972849	2095	34.431896	3110	5.739766	490	7.62415	686	7.203192	593	2.16968394387516e-13	-1.87895372718981	down	--	--	Molecular Function: transcription regulatory region sequence-specific DNA binding (GO:0000976);; Biological Process: circadian regulation of gene expression (GO:0032922);;	K21599|4.5e-155|lcf:108886176|K21599 circadian-associated transcriptional repressor | (RefSeq) circadian-associated transcriptional repressor-like	--	--	--	Circadian-associated transcriptional repressor	--	S	Function unknown	PREDICTED: circadian-associated transcriptional repressor-like [Lates calcarifer]	molecular function: binding (GO:0005488);; biological process: multicellular organismal process (GO:0032501);; biological process: single-organism process (GO:0044699);; biological process: rhythmic process (GO:0048511);; biological process: biological regulation (GO:0065007)
gene-LOC119905831	LOC119905831	36.250526	3101	32.685612	2890	32.203873	3434	13.684364	1377	8.843647	940	13.741558	1335	6.60796687563141e-07	-1.26733795585986	down	[M]	Cell wall/membrane/envelope biogenesis	Molecular Function: protein serine/threonine kinase activity (GO:0004674);; Molecular Function: ATP binding (GO:0005524);; Cellular Component: cytoplasm (GO:0005737);; Biological Process: optokinetic behavior (GO:0007634);; Biological Process: negative regulation of apoptotic process (GO:0043066);; Biological Process: camera-type eye morphogenesis (GO:0048593);;	K04702|2.6e-184|sdu:111230738|K04702 proto-oncogene serine/threonine-protein kinase Pim-1 [EC:2.7.11.1] | (RefSeq) serine/threonine-protein kinase pim-1-like	--	[T]	Signal transduction mechanisms	Protein kinase domain	Serine/threonine-protein kinase pim-3 OS=Coturnix japonica OX=93934 GN=PIM3 PE=2 SV=1	T	Signal transduction mechanisms	serine/threonine-protein kinase pim-1-like [Seriola dumerili]	biological process: metabolic process (GO:0008152);; biological process: cellular process (GO:0009987);; molecular function: catalytic activity (GO:0003824);; molecular function: binding (GO:0005488);; cellular component: cell (GO:0005623);; cellular component: cell part (GO:0044464);; biological process: behavior (GO:0007610);; biological process: multicellular organismal process (GO:0032501);; …
gene-LOC119910752	LOC119910752	17.475023	590	22.903637	800	15.307317	645	8.289063	330	5.449153	229	4.152022	160	0.00345296691025041	-1.2552800279851	down	--	--	Cellular Component: integral component of membrane (GO:0016021);;	--	--	--	--	Interferon-induced 6-16 family	--	--	--	Interferon alpha-inducible protein 27, mitochondrial [Larimichthys crocea]	cellular component: membrane (GO:0016020);; cellular component: membrane part (GO:0044425)
gene-LOC119900308	LOC119900308	190.179703	7422	153.429108	6190	54.935982	2673	13.994132	643	23.00699	1116	30.068956	1333	4.37865813593112e-05	-1.86178426643203	down	--	--	Molecular Function: GTPase activator activity (GO:0005096);; Biological Process: neural crest cell development (GO:0014032);; Biological Process: negative regulation of G-protein coupled receptor protein signaling pathway (GO:0045744);; Biological Process: negative regulation of neural crest formation (GO:0090301);;	K18154|4.3e-41|oaa:100086340|K18154 regulator of G-protein signaling 2 | (RefSeq) RGS2; regulator of G-protein signaling 2	cGMP-PKG signaling pathway (ko04022);; Olfactory transduction (ko04740);; Oxytocin signaling pathway (ko04921)	[T]	Signal transduction mechanisms	Regulator of G protein signaling domain	Regulator of G-protein signaling 1 OS=Xenopus laevis OX=8355 GN=rgs1 PE=2 SV=2	T	Signal transduction mechanisms	regulator of G-protein signaling 21-like [Morone saxatilis]	biological process: biological regulation (GO:0065007);; molecular function: molecular function regulator (GO:0098772);; biological process: cellular process (GO:0009987);; biological process: multicellular organismal process (GO:0032501);; biological process: developmental process (GO:0032502);; biological process: single-organism process (GO:0044699)
gene-ela3l	ela3l	11.466796	315	23.075994	655	140.310181	4802	5.631452	182	8.103318	277	4.374307	137	0.00501420122495549	-1.67570273856382	down	[O]	Posttranslational modification, protein turnover, chaperones	Molecular Function: molecular_function (GO:0003674);; Molecular Function: catalytic activity (GO:0003824);; Molecular Function: endopeptidase activity (GO:0004175);; Molecular Function: serine-type endopeptidase activity (GO:0004252);; Cellular Component: cellular_component (GO:0005575);; Cellular Component: extracellular region (GO:0005576);; Cellular Component: extracellular space (GO:0005615);…	K01346|1.5e-153|lco:104922804|K01346 pancreatic elastase II [EC:3.4.21.71] | (RefSeq) chymotrypsin-like elastase family member 2A	--	[E]	Amino acid transport and metabolism	Trypsin	Elastase-1 OS=Salmo salar OX=8030 PE=1 SV=1	E	Amino acid transport and metabolism	chymotrypsin-like elastase family member 2A [Larimichthys crocea]	molecular function: catalytic activity (GO:0003824);; biological process: metabolic process (GO:0008152);; cellular component: extracellular region (GO:0005576);; cellular component: extracellular region part (GO:0044421);; cellular component: cell (GO:0005623);; cellular component: cell part (GO:0044464);; biological process: multicellular organismal process (GO:0032501);; biological process: de…
gene-LOC119891871	LOC119891871	1.064077	132	2.687745	344	1.034046	160	0.15305	23	0.318186	49	0.1034	15	0.000395535154049109	-1.86826944109702	down	[E]	Amino acid transport and metabolism	Molecular Function: cation:chloride symporter activity (GO:0015377);; Cellular Component: integral component of membrane (GO:0016021);;	K10951|0.0e+00|lco:104934760|K10951 solute carrier family 12 (sodium/potassium/chloride transporter), member 2 | (RefSeq) solute carrier family 12 member 2	--	[P]	Inorganic ion transport and metabolism	Solute carrier family 12	Solute carrier family 12 member 2 OS=Squalus acanthias OX=7797 GN=SLC12A2 PE=1 SV=1	P	Inorganic ion transport and metabolism	Solute carrier family 12 member 2 [Collichthys lucidus]	biological process: localization (GO:0051179);; molecular function: transporter activity (GO:0005215);; cellular component: membrane (GO:0016020);; cellular component: membrane part (GO:0044425)
gene-fkbp5	fkbp5	98.105823	11710	114.15919500000001	14078	89.278385	13278	12.093457	1691	33.853074	4965	8.740338	1186	0.00133948497385868	-1.64618754406967	down	[O]	Posttranslational modification, protein turnover, chaperones	Molecular Function: peptidyl-prolyl cis-trans isomerase activity (GO:0003755);; Molecular Function: FK506 binding (GO:0005528);; Molecular Function: heat shock protein binding (GO:0031072);;	K09571|6.0e-240|lcf:108889346|K09571 FK506-binding protein 4/5 [EC:5.2.1.8] | (RefSeq) peptidyl-prolyl cis-trans isomerase FKBP5-like	--	[O]	Posttranslational modification, protein turnover, chaperones	FKBP-type peptidyl-prolyl cis-trans isomerase	RNA polymerase II-associated protein 3 OS=Xenopus tropicalis OX=8364 GN=rpap3 PE=2 SV=1	O	Posttranslational modification, protein turnover, chaperones	PREDICTED: peptidyl-prolyl cis-trans isomerase FKBP5-like [Lates calcarifer]	molecular function: catalytic activity (GO:0003824);; molecular function: binding (GO:0005488)
gene-si:ch211-127i16.2	si:ch211-127i16.2	0.164654	10	0.335367	20	0.191638	14	1.788815	117	1.383977	96	1.374904	87	1.75329119246364e-06	2.10143940909097	up	[E]	Amino acid transport and metabolism	Molecular Function: oxidoreductase activity (GO:0016491);; Biological Process: oxidation-reduction process (GO:0055114);;	K00274|3.9e-270|lcf:108884103|K00274 monoamine oxidase [EC:1.4.3.4] | (RefSeq) probable flavin-containing monoamine oxidase A	Glycine, serine and threonine metabolism (ko00260);; Arginine and proline metabolism (ko00330);; Histidine metabolism (ko00340);; Tyrosine metabolism (ko00350);; Phenylalanine metabolism (ko00360);; Tryptophan metabolism (ko00380);; Drug metabolism - cytochrome P450 (ko00982)	[Q]	Secondary metabolites biosynthesis, transport and catabolism	Flavin containing amine oxidoreductase	Amine oxidase [flavin-containing] OS=Oncorhynchus mykiss OX=8022 GN=mao PE=2 SV=2	Q	Secondary metabolites biosynthesis, transport and catabolism	hypothetical protein PFLUV_G00199450 [Perca fluviatilis]	molecular function: catalytic activity (GO:0003824);; biological process: metabolic process (GO:0008152);; biological process: single-organism process (GO:0044699)
gene-zfand5a	zfand5a	55.635048999999995	4451	58.632366	4833	30.415519	3027	14.751269	1386	20.3637	2022	18.344109	1668	0.0076730655090729	-1.11285180466513	down	--	--	Molecular Function: DNA binding (GO:0003677);; Molecular Function: zinc ion binding (GO:0008270);;	K20287|1.7e-54|tng:GSTEN00020197G001|K20287 perilipin-3 | (RefSeq) unnamed protein product	--	[R]	General function prediction only	A20-like zinc finger	AN1-type zinc finger protein 3 homolog OS=Xenopus laevis OX=8355 GN=zfand3 PE=2 SV=1	S	Function unknown	AN1-type zinc finger protein 5 isoform X1 [Seriola dumerili]	molecular function: binding (GO:0005488)
gene-wscd2	wscd2	2.096871	255	1.31396	165	4.082953	618	0.580522	83	0.594079	90	0.829067	112	0.00661583645478804	-1.38076213090068	down	--	--	Molecular Function: sulfotransferase activity (GO:0008146);;	K01409|1.1e-52|ncc:104946831|K01409 N6-L-threonylcarbamoyladenine synthase [EC:2.3.1.234] | (RefSeq) probable tRNA N6-adenosine threonylcarbamoyltransferase	--	[GO]	Carbohydrate transport and metabolism;; Posttranslational modification, protein turnover, chaperones	WSC domain	WSC domain-containing protein 2 OS=Danio rerio OX=7955 GN=wscd2 PE=3 SV=1	--	--	WSC domain-containing protein 2 [Morone saxatilis]	molecular function: catalytic activity (GO:0003824)
gene-sgk1	sgk1	131.25562299999999	10487	99.392579	8212	218.579885	21775	30.838797	2900	48.39312400000001	4805	65.24177	5922	0.00629171444717118	-1.25008293140823	down	[T]	Signal transduction mechanisms	Biological Process: microtubule cytoskeleton organization (GO:0000226);; Biological Process: cell morphogenesis (GO:0000902);; Biological Process: regulation of cell growth (GO:0001558);; Biological Process: regulation of sodium ion transport (GO:0002028);; Biological Process: nematode larval development (GO:0002119);; Biological Process: larval development (GO:0002164);; Biological Process: syst…	K13302|0.0e+00|sdu:111235898|K13302 serum/glucocorticoid-regulated kinase 1 [EC:2.7.11.1] | (RefSeq) sgk1; serine/threonine-protein kinase Sgk1 isoform X1	FoxO signaling pathway (ko04068);; mTOR signaling pathway (ko04150)	[RT]	General function prediction only;; Signal transduction mechanisms	Protein kinase domain	Serine/threonine-protein kinase Sgk1 OS=Fundulus heteroclitus OX=8078 GN=sgk1 PE=2 SV=1	T	Signal transduction mechanisms	serine/threonine-protein kinase Sgk1 isoform X1 [Anabas testudineus]	biological process: cellular process (GO:0009987);; biological process: cellular component organization or biogenesis (GO:0071840);; biological process: developmental process (GO:0032502);; biological process: single-organism process (GO:0044699);; biological process: biological regulation (GO:0065007);; biological process: multicellular organismal process (GO:0032501);; biological process: local…
gene-LOC119901012	LOC119901012	5.592922	380	4.183595	294	5.713317	484	12.164537	972	9.03157	762	9.922586	765	0.00131689031895538	1.0430411049048	up	[P]	Inorganic ion transport and metabolism	Molecular Function: N,N-dimethylaniline monooxygenase activity (GO:0004499);; Cellular Component: endoplasmic reticulum membrane (GO:0005789);; Molecular Function: flavin adenine dinucleotide binding (GO:0050660);; Molecular Function: NADP binding (GO:0050661);;	K00485|2.6e-298|lcf:108879131|K00485 dimethylaniline monooxygenase (N-oxide forming) [EC:1.14.13.8] | (RefSeq) LOW QUALITY PROTEIN: dimethylaniline monooxygenase [N-oxide-forming] 5-like	Drug metabolism - cytochrome P450 (ko00982)	[Q]	Secondary metabolites biosynthesis, transport and catabolism	Flavin-binding monooxygenase-like	--	Q	Secondary metabolites biosynthesis, transport and catabolism	dimethylaniline monooxygenase [N-oxide-forming] 5-like [Anabas testudineus]	biological process: metabolic process (GO:0008152);; biological process: single-organism process (GO:0044699);; molecular function: catalytic activity (GO:0003824);; cellular component: cell (GO:0005623);; cellular component: membrane (GO:0016020);; cellular component: organelle (GO:0043226);; cellular component: organelle part (GO:0044422);; cellular component: membrane part (GO:0044425);; cellu…
gene-pim2	pim2	19.104046	1189	20.18379	1299	8.873507	689	5.249917	385	2.055315	159	4.965767	351	0.00187578551570152	-1.47421273267863	down	[T]	Signal transduction mechanisms	Molecular Function: protein serine/threonine kinase activity (GO:0004674);; Molecular Function: ATP binding (GO:0005524);; Cellular Component: cytoplasm (GO:0005737);; Biological Process: negative regulation of apoptotic process (GO:0043066);;	K08806|3.5e-151|sdu:111235452|K08806 proto-oncogene serine/threonine-protein kinase Pim-2 [EC:2.7.11.1] | (RefSeq) serine/threonine-protein kinase pim-2-like	--	[T]	Signal transduction mechanisms	Protein kinase domain	Serine/threonine-protein kinase pim-2 OS=Danio rerio OX=7955 GN=pim2 PE=2 SV=2	T	Signal transduction mechanisms	serine/threonine-protein kinase pim-2-like [Labrus bergylta]	biological process: metabolic process (GO:0008152);; biological process: cellular process (GO:0009987);; molecular function: catalytic activity (GO:0003824);; molecular function: binding (GO:0005488);; cellular component: cell (GO:0005623);; cellular component: cell part (GO:0044464);; biological process: biological regulation (GO:0065007)
gene-ciarta	ciarta	20.419987	2024	12.624956	1293	15.582888	1925	1.194259	140	2.497444	308	1.315749	149	1.75387369211629e-11	-2.51966608345381	down	--	--	Molecular Function: transcription regulatory region sequence-specific DNA binding (GO:0000976);; Biological Process: circadian regulation of gene expression (GO:0032922);;	K21599|3.0e-135|lcf:108888885|K21599 circadian-associated transcriptional repressor | (RefSeq) circadian-associated transcriptional repressor-like	--	--	--	Circadian-associated transcriptional repressor	--	S	Function unknown	circadian associated repressor of transcription a [Morone saxatilis]	molecular function: binding (GO:0005488);; biological process: multicellular organismal process (GO:0032501);; biological process: single-organism process (GO:0044699);; biological process: rhythmic process (GO:0048511);; biological process: biological regulation (GO:0065007)
gene-LOC119900185	LOC119900185	18.000578	1685	17.814377	1724	10.60134	1237	4.199432	463	5.645781	657	4.581249	487	0.000311982029667655	-1.33726643982053	down	[T]	Signal transduction mechanisms	Biological Process: MAPK cascade (GO:0000165);; Biological Process: regulation of protein phosphorylation (GO:0001932);; Biological Process: negative regulation of protein phosphorylation (GO:0001933);; Biological Process: response to molecule of bacterial origin (GO:0002237);; Biological Process: regulation of immune system process (GO:0002682);; Biological Process: negative regulation of immune…	K08814|5.1e-202|lco:104923111|K08814 tribbles homolog 1/2 | (RefSeq) tribbles homolog 1	--	[T]	Signal transduction mechanisms	Protein kinase domain	Serine/threonine-protein kinase 40 OS=Xenopus tropicalis OX=8364 GN=stk40 PE=2 SV=2	T	Signal transduction mechanisms	tribbles homolog 1 [Larimichthys crocea]	biological process: metabolic process (GO:0008152);; biological process: cellular process (GO:0009987);; biological process: signaling (GO:0023052);; biological process: single-organism process (GO:0044699);; biological process: response to stimulus (GO:0050896);; biological process: biological regulation (GO:0065007);; molecular function: catalytic activity (GO:0003824);; molecular function: mol…
gene-flvcr2a	flvcr2a	8.125535	886	6.6116969999999995	807	4.500858	669	14.861637	2021	20.750629	2938	10.289986	1434	0.00617855088920249	1.21772800816347	up	--	--	Cellular Component: integral component of membrane (GO:0016021);; Molecular Function: transmembrane transporter activity (GO:0022857);;	K08220|5.9e-247|sdu:111225794|K08220 MFS transporter, FLVCR family, feline leukemia virus subgroup C receptor-related protein | (RefSeq) flvcr2; feline leukemia virus subgroup C receptor-related protein 2 isoform X1	--	[R]	General function prediction only	Major Facilitator Superfamily	Solute carrier family 49 member A3 OS=Xenopus tropicalis OX=8364 GN=slc49a3 PE=2 SV=2	S	Function unknown	feline leukemia virus subgroup C receptor-related protein 2 isoform X1 [Seriola lalandi dorsalis]	cellular component: membrane (GO:0016020);; cellular component: membrane part (GO:0044425);; biological process: localization (GO:0051179);; molecular function: transporter activity (GO:0005215)
gene-scp2a	scp2a	78.634254	5722	65.853592	4953	63.626438	5771	155.406357	13299	144.143417	13026	108.400017	8955	0.00283470558922525	1.02012533568944	up	[I]	Lipid transport and metabolism	Molecular Function: transferase activity, transferring acyl groups other than amino-acyl groups (GO:0016747);;	K08764|1.3e-297|sdu:111228861|K08764 sterol carrier protein 2 [EC:2.3.1.176] | (RefSeq) scp2; non-specific lipid-transfer protein	Primary bile acid biosynthesis (ko00120);; Biosynthesis of unsaturated fatty acids (ko01040);; Fatty acid metabolism (ko01212);; PPAR signaling pathway (ko03320);; Peroxisome (ko04146)	[I]	Lipid transport and metabolism	SCP-2 sterol transfer family	Non-specific lipid-transfer protein (Fragment) OS=Gallus gallus OX=9031 GN=SCP2 PE=2 SV=1	I	Lipid transport and metabolism	non-specific lipid-transfer protein [Morone saxatilis]	molecular function: catalytic activity (GO:0003824)
gene-LOC119901707	LOC119901707	6.857148	631	4.92531	468	4.949989	568	12.899747	1395	10.981359	1254	9.126442	953	0.00645834136991324	1.0108816439247	up	--	--	Molecular Function: transmembrane signaling receptor activity (GO:0004888);; Biological Process: dorsal/ventral pattern formation (GO:0009953);; Cellular Component: integral component of membrane (GO:0016021);; Biological Process: Wnt signaling pathway (GO:0016055);;	K02375|0.0e+00|sdu:111233891|K02375 frizzled 5/8 | (RefSeq) frizzled-8-like	mTOR signaling pathway (ko04150);; Wnt signaling pathway (ko04310);; Melanogenesis (ko04916)	[T]	Signal transduction mechanisms	Frizzled/Smoothened family membrane region	Frizzled-8 OS=Xenopus laevis OX=8355 GN=fzd8 PE=1 SV=1	T	Signal transduction mechanisms	frizzled-8-like [Epinephelus lanceolatus]	biological process: cellular process (GO:0009987);; biological process: signaling (GO:0023052);; biological process: single-organism process (GO:0044699);; biological process: response to stimulus (GO:0050896);; biological process: biological regulation (GO:0065007);; molecular function: signal transducer activity (GO:0004871);; molecular function: molecular transducer activity (GO:0060089);; bio…
gene-tamalin	tamalin	16.833628	850	15.719038	820	12.432345	782	4.831376	287	4.0302	253	5.114446	293	3.10362609834954e-08	-1.44112202624375	down	--	--	Biological Process: microtubule cytoskeleton organization (GO:0000226);; Biological Process: mitotic cell cycle (GO:0000278);; Biological Process: nuclear division (GO:0000280);; Molecular Function: molecular_function (GO:0003674);; Molecular Function: binding (GO:0005488);; Molecular Function: protein binding (GO:0005515);; Cellular Component: cellular_component (GO:0005575);; Cellular Component…	K04465|2.7e-20|gfr:102032525|K04465 nuclear receptor subfamily 4 group A member 1 | (RefSeq) NR4A1; nuclear receptor subfamily 4 group A member 1	MAPK signaling pathway (ko04010)	[S]	Function unknown	PDZ domain	--	S	Function unknown	general receptor for phosphoinositides 1-associated scaffold protein [Amphiprion ocellaris]	biological process: cellular process (GO:0009987);; biological process: cellular component organization or biogenesis (GO:0071840);; biological process: single-organism process (GO:0044699);; molecular function: binding (GO:0005488);; cellular component: cell (GO:0005623);; cellular component: cell part (GO:0044464);; cellular component: organelle (GO:0043226);; cellular component: organelle part…
gene-socs3a	socs3a	310.58018500000003	18062	173.314076	10411	137.484505	10041	25.726291999999997	1766	13.200919	954	52.678742	3488	5.00925564084422e-06	-2.03254027218899	down	--	--	Biological Process: JAK-STAT cascade (GO:0007259);; Biological Process: intracellular signal transduction (GO:0035556);; Biological Process: negative regulation of apoptotic process (GO:0043066);;	K04696|1.1e-108|lcf:108902726|K04696 suppressor of cytokine signaling 3 | (RefSeq) socs3; suppressor of cytokine signaling 3	Ubiquitin mediated proteolysis (ko04120);; Insulin signaling pathway (ko04910);; Adipocytokine signaling pathway (ko04920);; Herpes simplex virus 1 infection (ko05168)	[T]	Signal transduction mechanisms	SH2 domain	Suppressor of cytokine signaling 3 OS=Gallus gallus OX=9031 GN=SOCS3 PE=2 SV=1	T	Signal transduction mechanisms	suppressor of cytokine signaling 3, partial [Siniperca chuatsi]	biological process: cellular process (GO:0009987);; biological process: signaling (GO:0023052);; biological process: single-organism process (GO:0044699);; biological process: response to stimulus (GO:0050896);; biological process: biological regulation (GO:0065007)
gene-LOC119917406	LOC119917406	2.016165	87	2.098091	94	21.63875	1157	0.174705	9	0.494197	27	0.184803	9	0.000367801432059418	-1.98978525044194	down	--	--	Molecular Function: triglyceride lipase activity (GO:0004806);; Cellular Component: extracellular region (GO:0005576);; Biological Process: lipid catabolic process (GO:0016042);; Molecular Function: metal ion binding (GO:0046872);;	K14074|5.4e-236|lco:104939162|K14074 pancreatic lipase-related protein 1 [EC:3.1.1.3] | (RefSeq) inactive pancreatic lipase-related protein 1 isoform X1	Glycerolipid metabolism (ko00561)	--	--	Lipase	Lipoprotein lipase OS=Gallus gallus OX=9031 GN=LPL PE=1 SV=1	T	Signal transduction mechanisms	Inactive pancreatic lipase-related protein 1 [Collichthys lucidus]	molecular function: catalytic activity (GO:0003824);; cellular component: extracellular region (GO:0005576);; biological process: metabolic process (GO:0008152);; biological process: single-organism process (GO:0044699);; molecular function: binding (GO:0005488)
gene-LOC119891758	LOC119891758	1.043965	219	1.557113	337	1.842199	480	0.496251	122	0.53277	139	0.609724	144	0.0042197980634635	-1.14064689038732	down	--	--	--	K12869|9.0e-52|gfr:102042741|K12869 crooked neck | (RefSeq) FAM169B; family with sequence similarity 169 member B	Spliceosome (ko03040)	--	--	--	--	S	Function unknown	PREDICTED: trichohyalin-like isoform X1 [Lates calcarifer]	--
gene-LOC119915317	LOC119915317	9.668986	762	5.46845	446	3.808722	374	23.971405	2221	31.685429	3099	10.385413	929	0.0066995364918006	1.455737588887	up	--	--	Biological Process: reproduction (GO:0000003);; Biological Process: developmental process involved in reproduction (GO:0003006);; Molecular Function: molecular_function (GO:0003674);; Molecular Function: protein disulfide isomerase activity (GO:0003756);; Molecular Function: catalytic activity (GO:0003824);; Cellular Component: cellular_component (GO:0005575);; Cellular Component: intracellular (…	K20354|3.7e-254|lcf:108901681|K20354 protein disulfide-isomerase-like protein of the testis | (RefSeq) protein disulfide-isomerase-like	--	[O]	Posttranslational modification, protein turnover, chaperones	Thioredoxin-like domain	Protein disulfide-isomerase OS=Gallus gallus OX=9031 GN=P4HB PE=1 SV=3	O	Posttranslational modification, protein turnover, chaperones	protein disulfide-isomerase [Morone saxatilis]	biological process: reproduction (GO:0000003);; biological process: reproductive process (GO:0022414);; biological process: developmental process (GO:0032502);; molecular function: catalytic activity (GO:0003824);; cellular component: cell (GO:0005623);; cellular component: cell part (GO:0044464);; cellular component: organelle (GO:0043226);; biological process: cellular process (GO:0009987);; bi…
gene-lrrc32	lrrc32	7.937499	927	6.291273	759	15.153371	2204	2.749533	378	1.967947	286	2.722519	361	0.000148915689853836	-1.54694064305379	down	--	--	Molecular Function: protein binding (GO:0005515);;	--	--	[R]	General function prediction only	Leucine rich repeat	--	S	Function unknown	transforming growth factor beta activator LRRC32 isoform X1 [Epinephelus lanceolatus]	molecular function: binding (GO:0005488)
gene-LOC119896191	LOC119896191	1.723885	96	1.25105	72	4.868376	337	0.165874	11	0.073439	6	0.296895	19	9.2577090732713e-06	-2.25208833664725	down	--	--	Molecular Function: G-protein coupled receptor activity (GO:0004930);; Cellular Component: integral component of membrane (GO:0016021);;	K04150|1.8e-171|sdu:111222322|K04150 histamine receptor H2 | (RefSeq) histamine H2 receptor-like	Calcium signaling pathway (ko04020);; Neuroactive ligand-receptor interaction (ko04080)	[R]	General function prediction only	7 transmembrane receptor (rhodopsin family)	Beta-4C adrenergic receptor OS=Meleagris gallopavo OX=9103 GN=ADRB4C PE=2 SV=1	T	Signal transduction mechanisms	histamine receptor H2b [Epinephelus lanceolatus]	biological process: cellular process (GO:0009987);; biological process: signaling (GO:0023052);; biological process: single-organism process (GO:0044699);; biological process: response to stimulus (GO:0050896);; biological process: biological regulation (GO:0065007);; molecular function: signal transducer activity (GO:0004871);; molecular function: molecular transducer activity (GO:0060089);; cel…
gene-LOC119890366	LOC119890366	75.597717	2256	25.43549	785	90.349411	3361	6.290661	221	4.142716	154	3.222361	110	9.12369639015779e-11	-2.7206431785744	down	--	--	Molecular Function: metalloendopeptidase activity (GO:0004222);; Molecular Function: zinc ion binding (GO:0008270);;	K18543|1.0e-58|mze:101468145|K18543 choriolysin H [EC:3.4.24.67] | (RefSeq) high choriolytic enzyme 1	--	[O]	Posttranslational modification, protein turnover, chaperones	Astacin (Peptidase family M12A)	High choriolytic enzyme 1 OS=Oryzias latipes OX=8090 GN=hcea PE=1 SV=1	O	Posttranslational modification, protein turnover, chaperones	high choriolytic enzyme 1-like [Epinephelus lanceolatus]	biological process: metabolic process (GO:0008152);; molecular function: catalytic activity (GO:0003824);; molecular function: binding (GO:0005488)
gene-LOC119888990	LOC119888990	187.431595	6846	289.307709	10923	72.883003	3319	40.836224	1755	44.999184	2042	53.18943	2206	0.00359379556398743	-1.43689910895293	down	--	--	Cellular Component: nucleus (GO:0005634);; Biological Process: regulation of cell cycle (GO:0051726);;	K04402|3.8e-80|sdu:111231824|K04402 growth arrest and DNA-damage-inducible protein | (RefSeq) growth arrest and DNA damage-inducible protein GADD45 beta-like	MAPK signaling pathway (ko04010);; FoxO signaling pathway (ko04068);; Cell cycle (ko04110);; p53 signaling pathway (ko04115);; Apoptosis (ko04210);; Cellular senescence (ko04218)	--	--	Ribosomal protein L7Ae/L30e/S12e/Gadd45 family	--	S	Function unknown	growth arrest and DNA damage-inducible protein GADD45 beta [Amphiprion ocellaris]	cellular component: cell (GO:0005623);; cellular component: organelle (GO:0043226);; cellular component: cell part (GO:0044464);; biological process: biological regulation (GO:0065007)
gene-carmil3	carmil3	0.37778999999999996	58	0.8887	137	0.285343	54	0.055358	10	0.05126	10	0.113514	20	0.00265409186546386	-1.69196553446481	down	--	--	Biological Process: cell morphogenesis (GO:0000902);; Biological Process: cell morphogenesis involved in differentiation (GO:0000904);; Biological Process: regulation of cell growth (GO:0001558);; Molecular Function: molecular_function (GO:0003674);; Molecular Function: binding (GO:0005488);; Molecular Function: protein binding (GO:0005515);; Cellular Component: cellular_component (GO:0005575);; …	K20493|0.0e+00|sdu:111223807|K20493 leucine-rich repeat-containing protein 16 | (RefSeq) capping protein, Arp2/3 and myosin-I linker protein 3-like	--	[N]	Cell motility	CARMIL C-terminus	--	N	Cell motility	capping protein, Arp2/3 and myosin-I linker protein 3 [Morone saxatilis]	biological process: cellular process (GO:0009987);; biological process: developmental process (GO:0032502);; biological process: single-organism process (GO:0044699);; biological process: cellular component organization or biogenesis (GO:0071840);; biological process: biological regulation (GO:0065007);; molecular function: binding (GO:0005488);; cellular component: cell (GO:0005623);; cellular c…
gene-LOC119900306	LOC119900306	19.334460999999997	1624	17.980334	1561	9.756070000000001	1022	6.0803259999999995	602	4.167564	436	7.316439	698	0.00736300085606182	-1.1246040015825	down	--	--	Molecular Function: molecular_function (GO:0003674);; Molecular Function: GTPase activator activity (GO:0005096);; Cellular Component: cellular_component (GO:0005575);; Cellular Component: intracellular (GO:0005622);; Cellular Component: cell (GO:0005623);; Cellular Component: nucleus (GO:0005634);; Cellular Component: cytoplasm (GO:0005737);; Cellular Component: cytosol (GO:0005829);; Cellular C…	K16449|5.5e-99|lcf:108879595|K16449 regulator of G-protein signaling | (RefSeq) regulator of G-protein signaling 21-like isoform X1	--	[T]	Signal transduction mechanisms	Regulator of G protein signaling domain	Regulator of G-protein signaling 8 OS=Danio rerio OX=7955 GN=rgs8 PE=2 SV=1	T	Signal transduction mechanisms	PREDICTED: regulator of G-protein signaling 21-like isoform X2 [Lates calcarifer]	biological process: biological regulation (GO:0065007);; molecular function: molecular function regulator (GO:0098772);; cellular component: cell (GO:0005623);; cellular component: cell part (GO:0044464);; cellular component: organelle (GO:0043226);; cellular component: membrane (GO:0016020);; biological process: cellular process (GO:0009987);; biological process: signaling (GO:0023052);; biologi…
gene-LOC119902362	LOC119902362	11.27951	658	7.198664	434	7.855839	571	34.481129	2364	19.914568	1442	24.721888	1636	7.90687682867535e-06	1.51526489257721	up	[IQR]	Lipid transport and metabolism;; Secondary metabolites biosynthesis, transport and catabolism;; General function prediction only	Molecular Function: 3-keto sterol reductase activity (GO:0000253);; Biological Process: cholesterol biosynthetic process (GO:0006695);; Cellular Component: integral component of membrane (GO:0016021);;	K13373|1.8e-175|lcf:108883797|K13373 17beta-estradiol 17-dehydrogenase / 3beta-hydroxysteroid 3-dehydrogenase [EC:1.1.1.62 1.1.1.270] | (RefSeq) 3-keto-steroid reductase-like	Steroid biosynthesis (ko00100);; Steroid hormone biosynthesis (ko00140)	[I]	Lipid transport and metabolism	short chain dehydrogenase	WW domain-containing oxidoreductase OS=Gallus gallus OX=9031 GN=WWOX PE=2 SV=2	Q	Secondary metabolites biosynthesis, transport and catabolism	PREDICTED: 3-keto-steroid reductase-like [Lates calcarifer]	biological process: metabolic process (GO:0008152);; biological process: single-organism process (GO:0044699);; molecular function: catalytic activity (GO:0003824);; cellular component: membrane (GO:0016020);; cellular component: membrane part (GO:0044425)
gene-LOC119885546	LOC119885546	171.071991	17895	158.002396	17084	188.756943	24612	458.505554	56407	366.724091	47642	283.711273	33695	0.000977023984959322	1.12607239322511	up	[C]	Energy production and conversion	Biological Process: neural crest cell migration (GO:0001755);; Cellular Component: cytoplasm (GO:0005737);; Biological Process: one-carbon metabolic process (GO:0006730);; Biological Process: gastrulation (GO:0007369);; Biological Process: heart development (GO:0007507);; Biological Process: biosynthetic process (GO:0009058);; Biological Process: 10-formyltetrahydrofolate catabolic process (GO:00…	K00289|0.0e+00|lcf:108877470|K00289 formyltetrahydrofolate dehydrogenase [EC:1.5.1.6] | (RefSeq) LOW QUALITY PROTEIN: cytosolic 10-formyltetrahydrofolate dehydrogenase-like	One carbon pool by folate (ko00670)	[F]	Nucleotide transport and metabolism	Aldehyde dehydrogenase family	Cytosolic 10-formyltetrahydrofolate dehydrogenase OS=Xenopus tropicalis OX=8364 GN=aldh1l1 PE=2 SV=1	F	Nucleotide transport and metabolism	cytosolic 10-formyltetrahydrofolate dehydrogenase [Amphiprion ocellaris]	biological process: cellular process (GO:0009987);; biological process: locomotion (GO:0040011);; biological process: single-organism process (GO:0044699);; biological process: localization (GO:0051179);; cellular component: cell (GO:0005623);; cellular component: cell part (GO:0044464);; biological process: metabolic process (GO:0008152);; biological process: multicellular organismal process (GO…
gene-hspb9	hspb9	58.015049	1887	100.329498	3372	15.163235	615	5.251815	201	3.749635	152	4.267609	158	1.66553605166226e-07	-2.44293667692509	down	--	--	--	--	--	--	--	Hsp20/alpha crystallin family	--	S	Function unknown	hypothetical protein D5F01_LYC18997 [Larimichthys crocea]	--
gene-lypd6	lypd6	12.173340999999999	411	11.175863000000001	390	7.811409	328	2.103728	84	1.6029099999999998	68	4.160758	159	0.000223326517151906	-1.55152374346973	down	--	--	Molecular Function: molecular_function (GO:0003674);; Cellular Component: cellular_component (GO:0005575);; Cellular Component: cell (GO:0005623);; Biological Process: biological_process (GO:0008150);; Biological Process: regulation of signal transduction (GO:0009966);; Biological Process: negative regulation of signal transduction (GO:0009968);; Biological Process: regulation of receptor activit…	--	--	--	--	Ly6/PLAUR domain-containing protein 6, Lypd6	Ly6/PLAUR domain-containing protein 6 OS=Danio rerio OX=7955 GN=lypd6 PE=1 SV=1	S	Function unknown	ly6/PLAUR domain-containing protein 6 [Sander lucioperca]	cellular component: cell (GO:0005623);; biological process: biological regulation (GO:0065007);; cellular component: membrane (GO:0016020);; molecular function: molecular function regulator (GO:0098772);; cellular component: cell part (GO:0044464)
gene-LOC119897340	LOC119897340	6.305428	164	5.891076	158	41.712556	1334	0.604264	19	0.464057	16	0.510741	16	1.19308106681347e-07	-2.63523786150814	down	[O]	Posttranslational modification, protein turnover, chaperones	Molecular Function: serine-type endopeptidase activity (GO:0004252);;	K01312|1.2e-122|sdu:111236042|K01312 trypsin [EC:3.4.21.4] | (RefSeq) trypsin-1-like	Neuroactive ligand-receptor interaction (ko04080)	[E]	Amino acid transport and metabolism	Trypsin	Trypsin-1 OS=Salmo salar OX=8030 PE=1 SV=1	E	Amino acid transport and metabolism	hypothetical protein EPR50_G00062180 [Perca flavescens]	biological process: metabolic process (GO:0008152);; molecular function: catalytic activity (GO:0003824)
gene-LOC119913020	LOC119913020	5.891762	225	10.063382	396	5.507008	262	0.187129	9	0.0	0	0.268949	12	1.35924836213224e-13	-3.33069721409276	down	--	--	Biological Process: response to acid chemical (GO:0001101);; Cellular Component: cellular_component (GO:0005575);; Cellular Component: cell (GO:0005623);; Cellular Component: plasma membrane (GO:0005886);; Biological Process: multicellular organism development (GO:0007275);; Biological Process: nervous system development (GO:0007399);; Biological Process: central nervous system development (GO:00…	K17270|4.0e-71|lco:104937830|K17270 myelin-oligodendrocyte glycoprotein | (RefSeq) myelin-oligodendrocyte glycoprotein-like isoform X1	--	--	--	Immunoglobulin V-set domain	--	S	Function unknown	myelin-oligodendrocyte glycoprotein-like [Morone saxatilis]	biological process: response to stimulus (GO:0050896);; cellular component: cell (GO:0005623);; cellular component: membrane (GO:0016020);; cellular component: cell part (GO:0044464);; biological process: multicellular organismal process (GO:0032501);; biological process: developmental process (GO:0032502);; biological process: single-organism process (GO:0044699);; cellular component: membrane p…
gene-LOC119900950	LOC119900950	49.429339999999996	3160	54.237852000000004	3584	32.470254	2588	9.219947000000001	694	15.842705	1259	18.856149000000002	1369	0.0017480222932737	-1.28119236648248	down	--	--	Molecular Function: signaling adaptor activity (GO:0035591);;	K06521|5.7e-17|tng:GSTEN00028535G001|K06521 semaphorin 4 | (RefSeq) unnamed protein product	--	--	--	PH domain	--	T	Signal transduction mechanisms	signal-transducing adaptor protein 1-like [Morone saxatilis]	molecular function: binding (GO:0005488)
gene-LOC119886045	LOC119886045	27.237446	1402	20.613672	1097	21.731218	1394	56.324429	3408	42.640831	2725	39.326347	2297	0.00218116092926145	1.03171007054514	up	--	--	Cellular Component: endoplasmic reticulum membrane (GO:0005789);; Cellular Component: integral component of membrane (GO:0016021);;	K13249|1.7e-131|sdu:111221496|K13249 translocon-associated protein subunit alpha | (RefSeq) translocon-associated protein subunit alpha-like	Protein processing in endoplasmic reticulum (ko04141)	[U]	Intracellular trafficking, secretion, and vesicular transport	Translocon-associated protein (TRAP), alpha subunit	Translocon-associated protein subunit alpha OS=Oncorhynchus mykiss OX=8022 GN=ssr1 PE=2 SV=1	U	Intracellular trafficking, secretion, and vesicular transport	translocon-associated protein subunit alpha-like [Morone saxatilis]	cellular component: cell (GO:0005623);; cellular component: membrane (GO:0016020);; cellular component: organelle (GO:0043226);; cellular component: organelle part (GO:0044422);; cellular component: membrane part (GO:0044425);; cellular component: cell part (GO:0044464)
gene-rims1b	rims1b	0.814455	183	0.589099	137	0.603988	169	0.179001	48	0.189583	53	0.283305	72	0.00193741731620599	-1.27594508753585	down	--	--	Biological Process: intracellular protein transport (GO:0006886);; Biological Process: exocytosis (GO:0006887);; Cellular Component: membrane (GO:0016020);; Molecular Function: Rab GTPase binding (GO:0017137);; Molecular Function: metal ion binding (GO:0046872);; Cellular Component: presynaptic active zone (GO:0048786);;	K15291|0.0e+00|lcf:108884519|K15291 regulating synaptic membrane exocytosis protein 1 | (RefSeq) regulating synaptic membrane exocytosis protein 1-like	--	[U]	Intracellular trafficking, secretion, and vesicular transport	C2 domain	Protein kinase C beta type OS=Xenopus laevis OX=8355 GN=prkcb PE=2 SV=1	U	Intracellular trafficking, secretion, and vesicular transport	regulating synaptic membrane exocytosis protein 1 isoform X1 [Epinephelus lanceolatus]	biological process: localization (GO:0051179);; biological process: cellular process (GO:0009987);; biological process: single-organism process (GO:0044699);; cellular component: membrane (GO:0016020);; molecular function: binding (GO:0005488);; cellular component: cell (GO:0005623);; cellular component: synapse part (GO:0044456);; cellular component: cell part (GO:0044464);; cellular component: …
gene-ccn1	ccn1	92.912888	5572	66.689346	4134	59.055851	4415	5.752142	406	12.044893	898	21.560455	1468	1.69375705650883e-05	-1.86025909731625	down	--	--	Molecular Function: insulin-like growth factor binding (GO:0005520);; Cellular Component: extracellular region (GO:0005576);; Biological Process: fin regeneration (GO:0031101);;	K06829|5.6e-215|lco:104919042|K06829 insulin-like growth factor-binding protein 10 | (RefSeq) ccn1; protein CYR61	--	--	--	CCN3 Nov like TSP1 domain	CCN family member 1 OS=Gallus gallus OX=9031 GN=CCN1 PE=2 SV=1	W	Extracellular structures	protein CYR61 [Larimichthys crocea]	molecular function: binding (GO:0005488);; cellular component: extracellular region (GO:0005576);; biological process: developmental process (GO:0032502);; biological process: growth (GO:0040007);; biological process: single-organism process (GO:0044699);; biological process: response to stimulus (GO:0050896)
gene-cdkn1a	cdkn1a	9.496341	666	8.79586	637	4.63968	404	1.653951	134	1.371655	119	2.65246	208	7.15376527307179e-05	-1.59975523153629	down	--	--	Molecular Function: cyclin-dependent protein serine/threonine kinase inhibitor activity (GO:0004861);; Cellular Component: nucleus (GO:0005634);; Biological Process: cell cycle arrest (GO:0007050);; Biological Process: regulation of mitotic cell cycle (GO:0007346);; Biological Process: response to X-ray (GO:0010165);; Biological Process: aorta development (GO:0035904);; Biological Process: skelet…	K06625|1.8e-64|lcf:108886473|K06625 cyclin-dependent kinase inhibitor 1A | (RefSeq) LOW QUALITY PROTEIN: cyclin-dependent kinase inhibitor 1-like	ErbB signaling pathway (ko04012);; FoxO signaling pathway (ko04068);; Cell cycle (ko04110);; p53 signaling pathway (ko04115);; Cellular senescence (ko04218)	[T]	Signal transduction mechanisms	Cyclin-dependent kinase inhibitor	--	T	Signal transduction mechanisms	cyclin-dependent kinase inhibitor 1 isoform X2 [Epinephelus lanceolatus]	biological process: biological regulation (GO:0065007);; molecular function: molecular function regulator (GO:0098772);; cellular component: cell (GO:0005623);; cellular component: organelle (GO:0043226);; cellular component: cell part (GO:0044464);; biological process: cellular process (GO:0009987);; biological process: single-organism process (GO:0044699);; biological process: response to stimu…
gene-LOC119886780	LOC119886780	17.704945	559	4.259246	139	6.062146	239	40.485996	1501	30.182476	1182	27.966925	1001	0.00847180774033369	1.4296900121723	up	[R]	General function prediction only	Molecular Function: magnesium ion binding (GO:0000287);; Biological Process: catecholamine metabolic process (GO:0006584);; Molecular Function: catechol O-methyltransferase activity (GO:0016206);; Biological Process: methylation (GO:0032259);; Biological Process: neurotransmitter catabolic process (GO:0042135);; Molecular Function: L-dopa O-methyltransferase activity (GO:0102084);; Molecular Func…	K00545|2.4e-140|sdu:111221839|K00545 catechol O-methyltransferase [EC:2.1.1.6] | (RefSeq) comt; catechol O-methyltransferase	Steroid hormone biosynthesis (ko00140);; Tyrosine metabolism (ko00350)	[Q]	Secondary metabolites biosynthesis, transport and catabolism	O-methyltransferase	Catechol O-methyltransferase B OS=Danio rerio OX=7955 GN=comtb PE=2 SV=1	Q	Secondary metabolites biosynthesis, transport and catabolism	catechol O-methyltransferase B [Morone saxatilis]	molecular function: binding (GO:0005488);; biological process: metabolic process (GO:0008152);; biological process: cellular process (GO:0009987);; molecular function: catalytic activity (GO:0003824);; biological process: biological regulation (GO:0065007)
gene-LOC119917810	LOC119917810	424.065155	15872	144.132095	5576	40.172928	1875	2315.163818	101908	2284.873047	106205	515.19812	21893	0.00256905849549686	1.76166689046556	up	--	--	--	K04644|7.9e-50|nfu:107390942|K04644 clathrin light chain A | (RefSeq) clta; clathrin light chain A isoform X1	Lysosome (ko04142);; Endocytosis (ko04144)	--	--	Protein of unknown function (DUF3421)	Natterin-3 OS=Thalassophryne nattereri OX=289382 PE=1 SV=1	S	Function unknown	natterin-3-like [Epinephelus lanceolatus]	--
gene-mep1a.1	mep1a.1	450.458771	33037	225.453583	17091	336.44092	30756	851.475281	73445	842.116755	76700	601.944519	50124	0.00642756190063035	1.14971715906342	up	--	--	Molecular Function: metalloendopeptidase activity (GO:0004222);; Biological Process: proteolysis (GO:0006508);; Cellular Component: membrane (GO:0016020);;	K01395|0.0e+00|lcf:108895818|K01395 meprin A [EC:3.4.24.18] | (RefSeq) LOW QUALITY PROTEIN: meprin A subunit alpha-like	--	[O]	Posttranslational modification, protein turnover, chaperones	Astacin (Peptidase family M12A)	Low choriolytic enzyme OS=Oryzias latipes OX=8090 GN=lce PE=1 SV=1	O	Posttranslational modification, protein turnover, chaperones	meprin A, alpha (PABA peptide hydrolase), tandem duplicate 1 isoform X1 [Sander lucioperca]	biological process: metabolic process (GO:0008152);; molecular function: catalytic activity (GO:0003824);; cellular component: membrane (GO:0016020)
gene-LOC119918172	LOC119918172	23.847866	2108	22.201706	2029	11.339994	1250	2.945921	307	4.373515	481	4.678641	470	2.04775428372612e-06	-1.78387762454636	down	[T]	Signal transduction mechanisms	Biological Process: regulation of peptide secretion (GO:0002791);; Biological Process: negative regulation of peptide secretion (GO:0002792);; Molecular Function: molecular_function (GO:0003674);; Molecular Function: catalytic activity (GO:0003824);; Molecular Function: protein kinase activity (GO:0004672);; Molecular Function: protein serine/threonine kinase activity (GO:0004674);; Molecular Fun…	K08807|4.7e-186|sdu:111225025|K08807 proto-oncogene serine/threonine-protein kinase Pim-3 [EC:2.7.11.1] | (RefSeq) pim3; serine/threonine-protein kinase pim-3	--	[T]	Signal transduction mechanisms	Protein kinase domain	Serine/threonine-protein kinase pim-3 OS=Coturnix japonica OX=93934 GN=PIM3 PE=2 SV=1	T	Signal transduction mechanisms	serine/threonine-protein kinase pim-3 [Parambassis ranga]	biological process: biological regulation (GO:0065007);; molecular function: catalytic activity (GO:0003824);; biological process: metabolic process (GO:0008152);; biological process: cellular process (GO:0009987);; molecular function: binding (GO:0005488);; cellular component: cell (GO:0005623);; cellular component: cell part (GO:0044464);; biological process: cellular component organization or …
gene-LOC119898062	LOC119898062	1.958116	118	1.548573	97	0.889479	67	0.273384	20	0.394271	30	0.263944	19	0.00501420122495549	-1.48900514744629	down	--	--	Biological Process: negative regulation of transcription from RNA polymerase II promoter (GO:0000122);; Molecular Function: transcription regulatory region sequence-specific DNA binding (GO:0000976);; Molecular Function: RNA polymerase II regulatory region sequence-specific DNA binding (GO:0000977);; Molecular Function: RNA polymerase II core promoter proximal region sequence-specific DNA binding…	K09209|2.0e-145|lco:104931580|K09209 krueppel-like factor 10/11 | (RefSeq) Krueppel-like factor 10	--	[R]	General function prediction only	Zinc-finger double domain	Transcription factor Sp8 OS=Gallus gallus OX=9031 GN=SP8 PE=2 SV=1	K	Transcription	Krueppel-like factor 10 [Larimichthys crocea]	biological process: biological regulation (GO:0065007);; molecular function: binding (GO:0005488);; molecular function: nucleic acid binding transcription factor activity (GO:0001071);; biological process: metabolic process (GO:0008152);; biological process: cellular process (GO:0009987);; biological process: multicellular organismal process (GO:0032501);; biological process: developmental proces…
gene-LOC119909227	LOC119909227	27.283903	1136	38.758408	1668	23.399166	1214	0.31384	16	0.982279	51	5.517716	261	0.000270417145251007	-2.00260714911138	down	--	--	Molecular Function: thyroxine 5'-deiodinase activity (GO:0004800);; Cellular Component: integral component of membrane (GO:0016021);; Biological Process: hormone biosynthetic process (GO:0042446);;	K07754|3.4e-86|mdo:100022264|K07754 thyroxine 5-deiodinase [EC:1.21.99.3] | (RefSeq) DIO3; iodothyronine deiodinase 3	Thyroid hormone signaling pathway (ko04919)	--	--	Iodothyronine deiodinase	Thyroxine 5-deiodinase OS=Sparus aurata OX=8175 GN=dio3 PE=2 SV=2	C	Energy production and conversion	thyroxine 5-deiodinase-like [Epinephelus lanceolatus]	biological process: metabolic process (GO:0008152);; biological process: single-organism process (GO:0044699);; molecular function: catalytic activity (GO:0003824);; cellular component: membrane (GO:0016020);; cellular component: membrane part (GO:0044425);; biological process: biological regulation (GO:0065007)
gene-apoc1	apoc1	21.271322	364	7.809758	138	4.904174	105	94.417648	1896	110.660652	2347	12.848555	250	0.00877155125152826	1.59389826094289	up	--	--	Cellular Component: extracellular region (GO:0005576);; Biological Process: lipoprotein metabolic process (GO:0042157);;	--	--	--	--	Apolipoprotein C-I (ApoC-1)	--	M	Cell wall/membrane/envelope biogenesis	apolipoprotein C-I-like [Sparus aurata]	cellular component: extracellular region (GO:0005576);; biological process: metabolic process (GO:0008152)
gene-hoxc12a	hoxc12a	1.837355	147	1.351643	112	4.756828	473	0.0	0	0.020218	2	0.0	0	1.43088260508646e-16	-3.76907347013902	down	--	--	Molecular Function: RNA polymerase II transcription factor activity, sequence-specific DNA binding (GO:0000981);; Molecular Function: molecular_function (GO:0003674);; Molecular Function: DNA binding (GO:0003677);; Molecular Function: transcription factor activity, sequence-specific DNA binding (GO:0003700);; Cellular Component: cellular_component (GO:0005575);; Cellular Component: intracellular …	K09297|4.0e-154|sdu:111219191|K09297 homeobox protein HoxC/D12 | (RefSeq) homeobox protein Hox-C12a	--	[K]	Transcription	Homeodomain	Homeobox protein Hox-C12a OS=Takifugu rubripes OX=31033 GN=hoxc12a PE=3 SV=1	K	Transcription	LOW QUALITY PROTEIN: homeobox protein Hox-C12a [Scophthalmus maximus]	biological process: biological regulation (GO:0065007);; molecular function: nucleic acid binding transcription factor activity (GO:0001071);; molecular function: binding (GO:0005488);; cellular component: cell (GO:0005623);; cellular component: cell part (GO:0044464);; cellular component: organelle (GO:0043226)
gene-nit2	nit2	9.604404	351	7.698806	291	6.823275	311	18.846142	810	19.241549	873	13.470821	559	0.00446807967005935	1.1031627293662	up	[R]	General function prediction only	Biological Process: cell activation (GO:0001775);; Biological Process: immune effector process (GO:0002252);; Biological Process: cell activation involved in immune response (GO:0002263);; Biological Process: myeloid leukocyte activation (GO:0002274);; Biological Process: myeloid cell activation involved in immune response (GO:0002275);; Biological Process: neutrophil activation involved in immun…	K13566|1.9e-151|mze:101480323|K13566 omega-amidase [EC:3.5.1.3] | (RefSeq) nit2; omega-amidase NIT2	Alanine, aspartate and glutamate metabolism (ko00250)	[E]	Amino acid transport and metabolism	Carbon-nitrogen hydrolase	Omega-amidase NIT2 OS=Danio rerio OX=7955 GN=nit2 PE=2 SV=1	E	Amino acid transport and metabolism	hypothetical protein PFLUV_G00115620 [Perca fluviatilis]	biological process: cellular process (GO:0009987);; biological process: single-organism process (GO:0044699);; biological process: immune system process (GO:0002376);; biological process: response to stimulus (GO:0050896);; molecular function: catalytic activity (GO:0003824);; cellular component: extracellular region (GO:0005576);; cellular component: cell (GO:0005623);; cellular component: cell …
gene-nr4a1	nr4a1	12.534041	985	11.598895	942	7.833734	767	1.142831	106	0.630883	62	1.500907	134	2.4635482240433e-16	-2.70932880028553	down	--	--	Molecular Function: steroid hormone receptor activity (GO:0003707);; Molecular Function: RNA polymerase II transcription factor activity, ligand-activated sequence-specific DNA binding (GO:0004879);; Cellular Component: nucleus (GO:0005634);; Molecular Function: zinc ion binding (GO:0008270);; Cellular Component: host cell nucleus (GO:0042025);; Molecular Function: sequence-specific DNA binding (…	K04465|2.6e-296|sdu:111234938|K04465 nuclear receptor subfamily 4 group A member 1 | (RefSeq) nuclear receptor subfamily 4 group A member 1-like	MAPK signaling pathway (ko04010)	[K]	Transcription	Ligand-binding domain of nuclear hormone receptor	Nuclear receptor subfamily 4 group A member 1 OS=Xenopus laevis OX=8355 GN=nr4a1 PE=2 SV=1	K	Transcription	nuclear receptor subfamily 4 group A member 1 [Morone saxatilis]	biological process: cellular process (GO:0009987);; biological process: signaling (GO:0023052);; biological process: single-organism process (GO:0044699);; biological process: response to stimulus (GO:0050896);; biological process: biological regulation (GO:0065007);; molecular function: signal transducer activity (GO:0004871);; molecular function: molecular transducer activity (GO:0060089);; mol…
gene-clocka	clocka	0.755227	137	0.414813	78	0.612477	139	1.878822	402	1.516261	341	1.729331	356	4.20954248251498e-05	1.45080760067607	up	--	--	Molecular Function: DNA binding (GO:0003677);; Molecular Function: transcription factor activity, sequence-specific DNA binding (GO:0003700);; Cellular Component: nucleus (GO:0005634);; Cellular Component: transcription factor complex (GO:0005667);; Cellular Component: cytoplasm (GO:0005737);; Molecular Function: protein dimerization activity (GO:0046983);;	K02223|0.0e+00|lco:104919094|K02223 circadian locomoter output cycles kaput protein [EC:2.3.1.48] | (RefSeq) clock; circadian locomoter output cycles protein kaput isoform X1	--	[K]	Transcription	PAS domain	Circadian locomoter output cycles protein kaput OS=Tyto alba OX=56313 GN=CLOCK PE=2 SV=1	K	Transcription	circadian locomoter output cycles protein kaput isoform X1 [Morone saxatilis]	molecular function: binding (GO:0005488);; biological process: biological regulation (GO:0065007);; molecular function: nucleic acid binding transcription factor activity (GO:0001071);; cellular component: cell (GO:0005623);; cellular component: organelle (GO:0043226);; cellular component: cell part (GO:0044464);; cellular component: macromolecular complex (GO:0032991)
gene-aqp10b	aqp10b	112.117706	3372	82.311188	2559	58.230865	2183	276.293884	9771	281.894836	10528	165.924927	5665	0.000675859333711821	1.41299048626642	up	[G]	Carbohydrate transport and metabolism	Molecular Function: channel activity (GO:0015267);; Cellular Component: integral component of membrane (GO:0016021);;	K09878|4.9e-167|lcf:108888869|K09878 aquaporin-10 | (RefSeq) aquaporin-10-like	--	[G]	Carbohydrate transport and metabolism	Major intrinsic protein	Aquaporin FA-CHIP OS=Pelophylax esculentus OX=8401 GN=AQPA PE=2 SV=1	G	Carbohydrate transport and metabolism	aquaporin 10b [Lateolabrax maculatus]	biological process: localization (GO:0051179);; molecular function: transporter activity (GO:0005215);; cellular component: membrane (GO:0016020);; cellular component: membrane part (GO:0044425)
gene-plekhn1	plekhn1	4.489594	386	4.629022	411	4.253996	455	0.982093	99	1.226351	131	1.932264	189	7.33364330028747e-05	-1.38488900887812	down	--	--	Biological Process: positive regulation of apoptotic process (GO:0043065);; Molecular Function: cardiolipin binding (GO:1901612);;	K23628|2.1e-21|egz:104133395|K23628 tubulin--tyrosine ligase like protein 10 | (RefSeq) TTLL10; inactive polyglycylase TTLL10	--	--	--	PH domain	--	T	Signal transduction mechanisms	pleckstrin homology domain-containing family N member 1 [Perca flavescens]	biological process: biological regulation (GO:0065007);; molecular function: binding (GO:0005488)
gene-LOC119908610	LOC119908610	0.439853	19	0.431505	20	0.211578	12	1.515138	77	1.086591	58	1.417591	69	0.00565186688105313	1.46462394355078	up	[E]	Amino acid transport and metabolism	Molecular Function: molecular_function (GO:0003674);; Molecular Function: catalytic activity (GO:0003824);; Molecular Function: lyase activity (GO:0016829);; Molecular Function: carbon-oxygen lyase activity (GO:0016835);; Molecular Function: hydro-lyase activity (GO:0016836);;	K18384|1.7e-183|lco:104930547|K18384 trans-L-3-hydroxyproline dehydratase [EC:4.2.1.77] | (RefSeq) l3hypdh; trans-3-hydroxy-L-proline dehydratase	Arginine and proline metabolism (ko00330)	--	--	Proline racemase	Trans-L-3-hydroxyproline dehydratase OS=Xenopus tropicalis OX=8364 GN=l3hypdh PE=2 SV=1	E	Amino acid transport and metabolism	Trans-L-3-hydroxyproline dehydratase [Larimichthys crocea]	molecular function: catalytic activity (GO:0003824)
gene-LOC119910151	LOC119910151	76.862656	12039	66.574806	10779	20.444433	3992	2.879197	531	3.611454	703	4.800413	854	1.59021446990462e-12	-2.84917665985874	down	--	--	Biological Process: activation of MAPK activity (GO:0000187);; Biological Process: response to reactive oxygen species (GO:0000302);; Biological Process: skeletal system development (GO:0001501);; Biological Process: angiogenesis (GO:0001525);; Biological Process: blood vessel development (GO:0001568);; Biological Process: response to hypoxia (GO:0001666);; Molecular Function: phosphatidylserine …	K16857|0.0e+00|lcf:108892515|K16857 thrombospondin 1 | (RefSeq) LOW QUALITY PROTEIN: thrombospondin-1-like	p53 signaling pathway (ko04115);; Phagosome (ko04145);; TGF-beta signaling pathway (ko04350);; Focal adhesion (ko04510);; ECM-receptor interaction (ko04512)	--	--	Thrombospondin C-terminal region	Thrombospondin-1 OS=Xenopus laevis OX=8355 GN=thbs1 PE=2 SV=1	T	Signal transduction mechanisms	thrombospondin-1-like [Epinephelus lanceolatus]	biological process: biological regulation (GO:0065007);; biological process: response to stimulus (GO:0050896);; biological process: multicellular organismal process (GO:0032501);; biological process: developmental process (GO:0032502);; biological process: single-organism process (GO:0044699);; molecular function: binding (GO:0005488);; biological process: immune system process (GO:0002376);; bi…
gene-dennd4a	dennd4a	1.943848	407	1.950977	419	1.251957	327	0.317785	79	0.31912	83	0.504047	120	2.10580264871949e-07	-1.77503092754155	down	--	--	Molecular Function: molecular_function (GO:0003674);; Molecular Function: nucleic acid binding (GO:0003676);; Molecular Function: DNA binding (GO:0003677);; Molecular Function: guanyl-nucleotide exchange factor activity (GO:0005085);; Molecular Function: Ras guanyl-nucleotide exchange factor activity (GO:0005088);; Molecular Function: binding (GO:0005488);; Molecular Function: protein binding (GO…	K20163|0.0e+00|lcf:108886304|K20163 DENN domain-containing protein 4 | (RefSeq) dennd4a; LOW QUALITY PROTEIN: C-myc promoter-binding protein	--	[T]	Signal transduction mechanisms	DENN (AEX-3) domain	--	T	Signal transduction mechanisms	PREDICTED: LOW QUALITY PROTEIN: C-myc promoter-binding protein [Lates calcarifer]	molecular function: binding (GO:0005488);; biological process: biological regulation (GO:0065007);; molecular function: molecular function regulator (GO:0098772);; cellular component: cell (GO:0005623);; cellular component: cell part (GO:0044464)
gene-dbpb	dbpb	34.248047	4121	30.004419	3732	26.389082	3958	4.789132	678	11.022036	1647	5.108667	698	0.000389557202073355	-1.56090117889534	down	--	--	Molecular Function: transcription factor activity, sequence-specific DNA binding (GO:0003700);; Biological Process: regulation of transcription from RNA polymerase II promoter (GO:0006357);;	K09057|2.0e-156|nfu:107379564|K09057 hepatic leukemia factor | (RefSeq) dbp; D site-binding protein	--	[K]	Transcription	Basic region leucine zipper	Transcription factor VBP OS=Gallus gallus OX=9031 GN=TEF PE=1 SV=2	K	Transcription	PREDICTED: D site-binding protein [Nothobranchius furzeri]	biological process: biological regulation (GO:0065007);; molecular function: nucleic acid binding transcription factor activity (GO:0001071)
gene-trhrb	trhrb	16.222715	2146	10.372857	1418	21.804165	3594	2.474146	385	3.589875	590	3.546619	533	1.79842706907149e-07	-1.86782721736967	down	--	--	Molecular Function: molecular_function (GO:0003674);; Molecular Function: transmembrane signaling receptor activity (GO:0004888);; Molecular Function: G-protein coupled receptor activity (GO:0004930);; Molecular Function: thyrotropin-releasing hormone receptor activity (GO:0004997);; Molecular Function: binding (GO:0005488);; Molecular Function: protein binding (GO:0005515);; Cellular Component: …	K04282|1.4e-187|lcf:108899094|K04282 thyrotropin-releasing hormone receptor | (RefSeq) LOW QUALITY PROTEIN: thyrotropin-releasing hormone receptor-like	Calcium signaling pathway (ko04020);; Neuroactive ligand-receptor interaction (ko04080)	[R]	General function prediction only	7 transmembrane receptor (rhodopsin family)	Thyrotropin-releasing hormone receptor OS=Gallus gallus OX=9031 GN=TRHR PE=2 SV=1	T	Signal transduction mechanisms	PREDICTED: LOW QUALITY PROTEIN: thyrotropin-releasing hormone receptor-like [Lates calcarifer]	biological process: cellular process (GO:0009987);; biological process: signaling (GO:0023052);; biological process: single-organism process (GO:0044699);; biological process: response to stimulus (GO:0050896);; biological process: biological regulation (GO:0065007);; molecular function: signal transducer activity (GO:0004871);; molecular function: molecular transducer activity (GO:0060089);; mol…
gene-LOC119895886	LOC119895886	15.6037	1107	16.817377	1215	3.0424320000000002	266	1.727674	142	1.28689	112	2.355753	188	0.000514888347616785	-1.80122487939227	down	--	--	Biological Process: MAPK cascade (GO:0000165);; Biological Process: activation of MAPK activity (GO:0000187);; Biological Process: blood vessel development (GO:0001568);; Biological Process: vasculogenesis (GO:0001570);; Biological Process: urogenital system development (GO:0001655);; Biological Process: ureteric bud development (GO:0001657);; Biological Process: branching involved in ureteric bu…	K18496|7.3e-82|ncc:104966015|K18496 fibroblast growth factor 1 | (RefSeq) putative fibroblast growth factor 1	MAPK signaling pathway (ko04010);; Regulation of actin cytoskeleton (ko04810)	[T]	Signal transduction mechanisms	Fibroblast growth factor	Putative fibroblast growth factor 1 OS=Danio rerio OX=7955 GN=fgf1 PE=2 SV=1	T	Signal transduction mechanisms	putative fibroblast growth factor 1 isoform X2 [Sander lucioperca]	biological process: metabolic process (GO:0008152);; biological process: cellular process (GO:0009987);; biological process: signaling (GO:0023052);; biological process: single-organism process (GO:0044699);; biological process: response to stimulus (GO:0050896);; biological process: biological regulation (GO:0065007);; biological process: developmental process (GO:0032502);; biological process: …
gene-dusp8a	dusp8a	14.643278	2058	9.93601	1443	12.790703	2240	2.01545	334	3.103846	542	4.083297	652	1.18301911922241e-06	-1.65476535736004	down	--	--	Molecular Function: protein tyrosine phosphatase activity (GO:0004725);; Molecular Function: MAP kinase tyrosine/serine/threonine phosphatase activity (GO:0017017);;	K04459|0.0e+00|lcf:108875362|K04459 dual specificity MAP kinase phosphatase [EC:3.1.3.16 3.1.3.48] | (RefSeq) dusp8; dual specificity protein phosphatase 8 isoform X1	MAPK signaling pathway (ko04010)	[V]	Defense mechanisms	Dual specificity phosphatase, catalytic domain	Dual specificity protein phosphatase 4 OS=Gallus gallus OX=9031 GN=DUSP4 PE=2 SV=1	V	Defense mechanisms	dual specificity protein phosphatase 8a [Morone saxatilis]	biological process: metabolic process (GO:0008152);; biological process: cellular process (GO:0009987);; molecular function: catalytic activity (GO:0003824);; biological process: biological regulation (GO:0065007)
gene-LOC119901857	LOC119901857	93.490608	5696	104.785927	6599	47.557747	3612	20.47323	1467	21.751022	1646	19.658728	1360	1.83425562912137e-05	-1.58253040390657	down	--	--	Biological Process: negative regulation of transcription from RNA polymerase II promoter (GO:0000122);; Cellular Component: nuclear chromosome (GO:0000228);; Biological Process: response to reactive oxygen species (GO:0000302);; Cellular Component: chromatin (GO:0000785);; Cellular Component: nuclear chromatin (GO:0000790);; Biological Process: cell morphogenesis (GO:0000902);; Molecular Function…	K17845|1.0e-187|lco:104931429|K17845 krueppel-like factor 2 | (RefSeq) Krueppel-like factor 2	FoxO signaling pathway (ko04068);; Apelin signaling pathway (ko04371)	[R]	General function prediction only	Zinc finger, C2H2 type	Transcription factor Sp8 OS=Gallus gallus OX=9031 GN=SP8 PE=2 SV=1	K	Transcription	Krueppel-like factor 2 [Morone saxatilis]	biological process: biological regulation (GO:0065007);; cellular component: cell (GO:0005623);; cellular component: organelle (GO:0043226);; cellular component: organelle part (GO:0044422);; cellular component: cell part (GO:0044464);; biological process: response to stimulus (GO:0050896);; cellular component: membrane-enclosed lumen (GO:0031974);; biological process: cellular process (GO:000998…
gene-slkb	slkb	7.453314	1234	4.486559	768	4.812835	993	14.227893	2769	12.311572	2530	9.850954	1851	0.00469206288263975	1.11350684170634	up	[T]	Signal transduction mechanisms	Biological Process: microtubule cytoskeleton organization (GO:0000226);; Biological Process: regulation of protein phosphorylation (GO:0001932);; Biological Process: positive regulation of protein phosphorylation (GO:0001934);; Biological Process: regulation of cell-matrix adhesion (GO:0001952);; Molecular Function: molecular_function (GO:0003674);; Molecular Function: catalytic activity (GO:0003…	K08836|0.0e+00|sdu:111217881|K08836 STE20-like kinase [EC:2.7.11.1] | (RefSeq) serine/threonine-protein kinase 10-like	Oocyte meiosis (ko04114)	[T]	Signal transduction mechanisms	Polo kinase kinase	Serine/threonine-protein kinase 10 OS=Gallus gallus OX=9031 GN=STK10 PE=3 SV=2	T	Signal transduction mechanisms	STE20-like kinase b [Morone saxatilis]	biological process: cellular process (GO:0009987);; biological process: cellular component organization or biogenesis (GO:0071840);; biological process: biological regulation (GO:0065007);; molecular function: catalytic activity (GO:0003824);; biological process: metabolic process (GO:0008152);; molecular function: binding (GO:0005488);; cellular component: cell (GO:0005623);; cellular component:…
gene-scn4ba	scn4ba	0.774751	189	0.724858	183	0.77801	236	0.183353	53	0.186913	57	0.337136	94	0.000524423637867773	-1.3463734272791	down	--	--	Biological Process: action potential (GO:0001508);; Cellular Component: voltage-gated sodium channel complex (GO:0001518);; Biological Process: regulation of heart rate (GO:0002027);; Biological Process: regulation of sodium ion transport (GO:0002028);; Biological Process: system process (GO:0003008);; Biological Process: muscle system process (GO:0003012);; Biological Process: circulatory system…	K04848|7.8e-119|lco:104936051|K04848 voltage-gated sodium channel type IV beta | (RefSeq) sodium channel subunit beta-4	Adrenergic signaling in cardiomyocytes (ko04261)	--	--	Immunoglobulin V-set domain	Myelin protein P0 OS=Xenopus laevis OX=8355 GN=mpz PE=2 SV=1	T	Signal transduction mechanisms	sodium channel subunit beta-4-like [Seriola lalandi dorsalis]	biological process: biological regulation (GO:0065007);; cellular component: cell (GO:0005623);; cellular component: membrane (GO:0016020);; cellular component: macromolecular complex (GO:0032991);; cellular component: membrane part (GO:0044425);; cellular component: cell part (GO:0044464);; biological process: multicellular organismal process (GO:0032501);; molecular function: transporter activi…
gene-LOC119912124	LOC119912124	13.071114	1784	6.16034	869	49.910103	8488	0.033907	6	0.025105	5	0.032282	6	6.06386328348624e-24	-4.47148176649881	down	[E]	Amino acid transport and metabolism	Molecular Function: transporter activity (GO:0005215);; Biological Process: ion transport (GO:0006811);; Cellular Component: membrane (GO:0016020);; Biological Process: transmembrane transport (GO:0055085);;	K14426|0.0e+00|lcf:108890832|K14426 solute carrier family 12 (sodium/chloride transporter), member 3 | (RefSeq) LOW QUALITY PROTEIN: solute carrier family 12 member 3-like	--	[P]	Inorganic ion transport and metabolism	Solute carrier family 12	Solute carrier family 12 member 3 OS=Pseudopleuronectes americanus OX=8265 GN=slc12a3 PE=2 SV=1	P	Inorganic ion transport and metabolism	PREDICTED: LOW QUALITY PROTEIN: solute carrier family 12 member 3-like [Lates calcarifer]	molecular function: transporter activity (GO:0005215);; biological process: localization (GO:0051179);; cellular component: membrane (GO:0016020)
gene-gjb3	gjb3	5.878907	304	5.460846	292	7.438546	480	2.936903	179	1.856371	120	2.371639	140	0.00250862608010852	-1.11615850851649	down	--	--	Cellular Component: connexin complex (GO:0005922);; Biological Process: cell communication (GO:0007154);; Cellular Component: integral component of membrane (GO:0016021);;	K07622|1.0e-144|lcf:108898012|K07622 gap junction beta-3 protein | (RefSeq) gap junction beta-3 protein-like	--	--	--	Connexin	Gap junction beta-6 protein OS=Gallus gallus OX=9031 GN=GJB6 PE=2 SV=1	S	Function unknown	connexin 35.4 [Morone saxatilis]	cellular component: cell (GO:0005623);; cellular component: membrane (GO:0016020);; cellular component: macromolecular complex (GO:0032991);; cellular component: membrane part (GO:0044425);; cellular component: cell part (GO:0044464);; biological process: cellular process (GO:0009987)
gene-si:ch211-195b13.1	si:ch211-195b13.1	33.377807	3154	26.596608	2597	16.41579	1934	4.60169	512	3.970231	468	5.190567	558	5.15501526162452e-11	-2.06076880109839	down	[T]	Signal transduction mechanisms	Molecular Function: protein serine/threonine kinase activity (GO:0004674);; Molecular Function: ATP binding (GO:0005524);; Molecular Function: phosphatidylinositol binding (GO:0035091);;	K13302|1.8e-227|mze:101469250|K13302 serum/glucocorticoid-regulated kinase 1 [EC:2.7.11.1] | (RefSeq) serine/threonine-protein kinase Sgk1 isoform X1	FoxO signaling pathway (ko04068);; mTOR signaling pathway (ko04150)	[RT]	General function prediction only;; Signal transduction mechanisms	Protein kinase domain	Serine/threonine-protein kinase Sgk1 OS=Gallus gallus OX=9031 GN=SGK1 PE=2 SV=1	T	Signal transduction mechanisms	serine/threonine-protein kinase Sgk1-like isoform X2 [Astatotilapia calliptera]	biological process: metabolic process (GO:0008152);; biological process: cellular process (GO:0009987);; molecular function: catalytic activity (GO:0003824);; molecular function: binding (GO:0005488)
gene-LOC119905250	LOC119905250	4.028162	865	6.845768	1519	1.397067	374	0.844959	214	0.862133	230	0.80333	196	0.00269552304780368	-1.56385879821293	down	--	--	Molecular Function: guanyl-nucleotide exchange factor activity (GO:0005085);;	K15048|0.0e+00|lco:104935649|K15048 kalirin [EC:2.7.11.1] | (RefSeq) kalirin isoform X1	--	[T]	Signal transduction mechanisms	RhoGEF domain	Triple functional domain protein OS=Danio rerio OX=7955 GN=trio PE=3 SV=1	T	Signal transduction mechanisms	kalirin isoform X1 [Larimichthys crocea]	biological process: biological regulation (GO:0065007);; molecular function: molecular function regulator (GO:0098772)
gene-txlnba	txlnba	0.98807	83	1.155075	101	3.209908	336	0.186745	19	0.427039	46	0.250532	24	0.00590750257489446	-1.58082596410408	down	--	--	Molecular Function: syntaxin binding (GO:0019905);;	--	--	[Z]	Cytoskeleton	Myosin-like coiled-coil protein	Beta-taxilin OS=Gallus gallus OX=9031 GN=TXLNB PE=2 SV=1	Z	Cytoskeleton	PREDICTED: alpha-taxilin-like isoform X1 [Lates calcarifer]	molecular function: binding (GO:0005488)
gene-LOC119904186	LOC119904186	0.951195	118	0.62682	81	0.534569	83	4.450478	650	1.05321	163	2.819707	398	0.00346078907022933	1.52968492346589	up	[R]	General function prediction only	Cellular Component: integral component of membrane (GO:0016021);; Molecular Function: transmembrane transporter activity (GO:0022857);;	K14383|0.0e+00|lco:104934116|K14383 solute carrier family 5 (sodium/myo-inositol cotransporter), member 3 | (RefSeq) sodium/myo-inositol cotransporter	--	[P]	Inorganic ion transport and metabolism	Sodium:solute symporter family	Sodium/glucose cotransporter 4 OS=Danio rerio OX=7955 GN=slc5a9 PE=2 SV=1	P	Inorganic ion transport and metabolism	sodium/myo-inositol cotransporter [Larimichthys crocea]	cellular component: membrane (GO:0016020);; cellular component: membrane part (GO:0044425);; biological process: localization (GO:0051179);; molecular function: transporter activity (GO:0005215)
gene-si:dkey-79d12.5	si:dkey-79d12.5	38.955208	2367	31.651636	1988	15.205935	1152	8.146675	583	7.33092	554	12.772303	881	0.00766466360533223	-1.23015723046172	down	--	--	--	K14443|4.4e-132|lcf:108890421|K14443 protein Tob/BTG | (RefSeq) protein BTG4-like	RNA degradation (ko03018)	[TR]	Signal transduction mechanisms;; General function prediction only	BTG family	Maternal B9.15 protein OS=Xenopus laevis OX=8355 PE=2 SV=1	T	Signal transduction mechanisms	PREDICTED: protein BTG4-like [Lates calcarifer]	--
gene-cipcb	cipcb	24.766464	4258	19.562895	3477	12.856871	2756	1.98211	401	4.652757	994	2.660062	520	2.91225973804244e-06	-1.94944755813129	down	--	--	Biological Process: negative regulation of circadian rhythm (GO:0042754);; Biological Process: negative regulation of transcription, DNA-templated (GO:0045892);;	K21989|8.3e-07|sasa:106611026|K21989 calcium permeable stress-gated cation channel | (RefSeq) calcium permeable stress-gated cation channel 1-like	--	--	--	Clock interacting protein circadian	CLOCK-interacting pacemaker OS=Xenopus laevis OX=8355 GN=cipc PE=2 SV=1	S	Function unknown	CLOCK-interacting pacemaker-like [Seriola dumerili]	biological process: biological regulation (GO:0065007)
gene-LOC119893379	LOC119893379	3.995673	170	4.089932	179	50.30595	2656	0.710079	36	0.591672	32	0.783873	38	6.91177926194134e-05	-2.15417321141981	down	[M]	Cell wall/membrane/envelope biogenesis	Molecular Function: metallocarboxypeptidase activity (GO:0004181);; Molecular Function: zinc ion binding (GO:0008270);;	K01298|2.2e-220|sdu:111229836|K01298 carboxypeptidase A2 [EC:3.4.17.15] | (RefSeq) carboxypeptidase A2-like isoform X1	--	[S]	Function unknown	Zinc carboxypeptidase	Carboxypeptidase O OS=Danio rerio OX=7955 GN=cpo PE=1 SV=1	O	Posttranslational modification, protein turnover, chaperones	carboxypeptidase A4 [Morone saxatilis]	biological process: metabolic process (GO:0008152);; molecular function: catalytic activity (GO:0003824);; molecular function: binding (GO:0005488)
gene-per1b	per1b	21.403964000000002	3860	26.601454999999998	4959	25.238678999999998	5673	2.9687140000000003	630	7.088503	1588	4.238141	868	4.44830521974078e-06	-1.80816188467595	down	--	--	Biological Process: negative regulation of transcription from RNA polymerase II promoter (GO:0000122);; Molecular Function: transcription regulatory region sequence-specific DNA binding (GO:0000976);; Molecular Function: RNA polymerase II regulatory region sequence-specific DNA binding (GO:0000977);; Molecular Function: RNA polymerase II core promoter proximal region sequence-specific DNA binding…	K21944|0.0e+00|lcf:108897052|K21944 period circadian protein 1 | (RefSeq) LOW QUALITY PROTEIN: period circadian protein homolog 1-like	--	[T]	Signal transduction mechanisms	Period protein 2/3C-terminal region	Period circadian protein homolog 2 OS=Gallus gallus OX=9031 GN=PER2 PE=2 SV=1	T	Signal transduction mechanisms	period 1 [Siniperca chuatsi]	biological process: biological regulation (GO:0065007);; molecular function: binding (GO:0005488);; cellular component: cell (GO:0005623);; cellular component: cell part (GO:0044464);; cellular component: organelle (GO:0043226);; cellular component: organelle part (GO:0044422);; biological process: cellular process (GO:0009987);; biological process: cellular component organization or biogenesis (…
gene-LOC119899820	LOC119899820	0.0	0	0.0	0	0.068954	9	1.04819	129	0.670329	87	0.414177	50	0.000906450491804785	1.88985503255814	up	--	--	Molecular Function: protein binding (GO:0005515);; Molecular Function: zinc ion binding (GO:0008270);;	K12009|3.0e-122|salp:112070522|K12009 tripartite motif-containing protein 27 [EC:2.3.2.27] | (RefSeq) zinc finger protein RFP-like	--	[O]	Posttranslational modification, protein turnover, chaperones	SPRY-associated domain	Zinc-binding protein A33 OS=Pleurodeles waltl OX=8319 PE=1 SV=2	O	Posttranslational modification, protein turnover, chaperones	hypothetical protein PFLUV_G00014120 [Perca fluviatilis]	molecular function: binding (GO:0005488)
gene-LOC119914097	LOC119914097	2.651851	458	2.552814	456	9.046431	1927	0.8634809999999999	175	0.870583	188	1.024871	202	0.00122885013472848	-1.63596374226159	down	--	--	Molecular Function: inorganic anion exchanger activity (GO:0005452);; Cellular Component: integral component of membrane (GO:0016021);;	K13575|0.0e+00|lcf:108882871|K13575 solute carrier family 4 (sodium bicarbonate cotransporter), member 4 | (RefSeq) electrogenic sodium bicarbonate cotransporter 1-like	--	[P]	Inorganic ion transport and metabolism	HCO3- transporter family	Electrogenic sodium bicarbonate cotransporter 1 OS=Ambystoma tigrinum OX=8305 GN=SLC4A4 PE=2 SV=1	P	Inorganic ion transport and metabolism	electrogenic sodium bicarbonate cotransporter 1-like isoform X2 [Seriola lalandi dorsalis]	biological process: localization (GO:0051179);; molecular function: transporter activity (GO:0005215);; cellular component: membrane (GO:0016020);; cellular component: membrane part (GO:0044425)
gene-LOC119908962	LOC119908962	67.087975	3173	93.496368	4570	16.110317	950	5.329115	297	4.559183	268	5.067722	273	9.49673940166251e-08	-2.42690730997808	down	--	--	Biological Process: negative regulation of transcription from RNA polymerase II promoter (GO:0000122);; Molecular Function: transcription regulatory region sequence-specific DNA binding (GO:0000976);; Molecular Function: RNA polymerase II regulatory region sequence-specific DNA binding (GO:0000977);; Molecular Function: RNA polymerase II core promoter proximal region sequence-specific DNA binding…	K09033|3.4e-68|lco:104922422|K09033 jun dimerization protein 2 | (RefSeq) jun dimerization protein 2	--	[K]	Transcription	bZIP transcription factor	Jun dimerization protein 2 OS=Danio rerio OX=7955 GN=jdp2 PE=2 SV=1	K	Transcription	jun dimerization protein 2-like [Sparus aurata]	biological process: biological regulation (GO:0065007);; molecular function: binding (GO:0005488);; molecular function: nucleic acid binding transcription factor activity (GO:0001071);; cellular component: cell (GO:0005623);; cellular component: cell part (GO:0044464);; cellular component: organelle (GO:0043226)
gene-LOC119919149	LOC119919149	3.895891	109	6.132408	177	49.55658	1723	0.794533	27	0.322404	12	1.359131	44	0.000218199489213874	-2.04539554419028	down	[O]	Posttranslational modification, protein turnover, chaperones	Molecular Function: serine-type endopeptidase activity (GO:0004252);; Biological Process: proteolysis (GO:0006508);;	K01312|9.1e-142|malb:109954698|K01312 trypsin [EC:3.4.21.4] | (RefSeq) trypsin-2-like	Neuroactive ligand-receptor interaction (ko04080)	[E]	Amino acid transport and metabolism	Trypsin	Trypsin-2 (Fragment) OS=Salmo salar OX=8030 PE=2 SV=1	E	Amino acid transport and metabolism	hypothetical protein PFLUV_G00087470 [Perca fluviatilis]	biological process: metabolic process (GO:0008152);; molecular function: catalytic activity (GO:0003824)
Micropterus_salmoides_newGene_1755	--	83.26771099999999	5839	74.76761699999999	5375	42.545526	3529	27.626716000000002	2014	22.033939	1860	22.691297	1726	0.00131689031895538	-1.23245303630713	down	--	--	Molecular Function: cysteine-type endopeptidase activity (GO:0004197);;	K04397|1.5e-39|sdu:111224299|K04397 caspase 7 [EC:3.4.22.60] | (RefSeq) caspase-3-like	Apoptosis (ko04210);; Salmonella infection (ko05132)	--	--	Caspase domain	--	D	Cell cycle control, cell division, chromosome partitioning	caspase-3-like [Seriola lalandi dorsalis]	biological process: metabolic process (GO:0008152);; molecular function: catalytic activity (GO:0003824)
gene-plekhf1	plekhf1	3.855116	160	1.50694	65	1.710218	89	0.560013	28	0.243527	13	0.436985	21	0.00277171216379982	-1.62217647949301	down	--	--	Molecular Function: metal ion binding (GO:0046872);;	K05724|2.2e-27|aqu:100640226|K05724 FYVE, RhoGEF and PH domain containing 5/6 | (RefSeq) nascent polypeptide-associated complex subunit alpha, muscle-specific form-like isoform X1	--	[R]	General function prediction only	FYVE zinc finger	Pleckstrin homology domain-containing family F member 2 OS=Gallus gallus OX=9031 GN=PLEKHF2 PE=2 SV=1	T	Signal transduction mechanisms	pleckstrin homology domain-containing family F member 1 [Sander lucioperca]	molecular function: binding (GO:0005488)
gene-ppp1r14c	ppp1r14c	0.132121	12	0.077676	7	0.277994	31	2.64432	270	1.951771	211	0.653088	65	4.79876326420985e-05	2.12282675355473	up	--	--	Cellular Component: cytoplasm (GO:0005737);; Biological Process: regulation of phosphorylation (GO:0042325);;	K17556|2.9e-68|sdu:111216468|K17556 protein phosphatase 1 regulatory subunit 14C | (RefSeq) ppp1r14c; protein phosphatase 1 regulatory subunit 14C	--	--	--	PKC-activated protein phosphatase-1 inhibitor	--	S	Function unknown	protein phosphatase 1 regulatory subunit 14C [Seriola dumerili]	cellular component: cell (GO:0005623);; cellular component: cell part (GO:0044464);; biological process: biological regulation (GO:0065007)
gene-oclnb	oclnb	0.714696	52	0.744478	56	0.906314	81	0.0	0	0.04459	4	0.04122	4	4.87878191290084e-07	-2.50620834808009	down	--	--	Cellular Component: integral component of membrane (GO:0016021);;	K06088|2.2e-196|lcf:108878001|K06088 occludin | (RefSeq) occludin-like isoform X1	Cell adhesion molecules (ko04514);; Tight junction (ko04530)	--	--	Occludin homology domain	Occludin OS=Xenopus laevis OX=8355 GN=ocln PE=1 SV=1	S	Function unknown	occludin b [Amphiprion ocellaris]	cellular component: membrane (GO:0016020);; cellular component: membrane part (GO:0044425)
gene-LOC119888537	LOC119888537	17.442896	1150	21.630489	1474	6.68619	550	4.718725	366	4.189648	344	4.484775	336	0.00829358377232677	-1.30041614321981	down	--	--	Cellular Component: integral component of membrane (GO:0016021);; Biological Process: retina development in camera-type eye (GO:0060041);; Biological Process: sensory epithelium regeneration (GO:0070654);;	K08523|6.0e-98|sdu:111226747|K08523 heparin-binding EGF-like growth factor | (RefSeq) proheparin-binding EGF-like growth factor isoform X1	ErbB signaling pathway (ko04012);; GnRH signaling pathway (ko04912)	--	--	--	Proheparin-binding EGF-like growth factor OS=Gallus gallus OX=9031 GN=HBEGF PE=1 SV=1	T	Signal transduction mechanisms	proheparin-binding EGF-like growth factor [Seriola lalandi dorsalis]	cellular component: membrane (GO:0016020);; cellular component: membrane part (GO:0044425);; biological process: developmental process (GO:0032502);; biological process: growth (GO:0040007);; biological process: single-organism process (GO:0044699);; biological process: response to stimulus (GO:0050896)
gene-slc25a33	slc25a33	82.502205	3902	134.585541	6578	21.726315	1281	3.799575	212	16.915901	994	5.981427	322	0.00231180580807658	-1.74987189621345	down	--	--	Molecular Function: ATP transmembrane transporter activity (GO:0005347);; Cellular Component: integral component of membrane (GO:0016021);;	K15116|1.8e-166|sdu:111219059|K15116 solute carrier family 25, member 33/36 | (RefSeq) slc25a33; solute carrier family 25 member 33	--	[C]	Energy production and conversion	Mitochondrial carrier protein	Solute carrier family 25 member 33 OS=Danio rerio OX=7955 GN=slc25a33 PE=2 SV=1	C	Energy production and conversion	solute carrier family 25 member 33 [Mastacembelus armatus]	biological process: single-organism process (GO:0044699);; biological process: localization (GO:0051179);; molecular function: transporter activity (GO:0005215);; cellular component: membrane (GO:0016020);; cellular component: membrane part (GO:0044425)
Micropterus_salmoides_newGene_5169	--	0.112727	11	0.072931	6	0.077475	8	1.042325	140	0.555543	60	0.790262	90	3.50175946886142e-07	2.38879339734973	up	--	--	--	--	--	--	--	--	--	--	--	--	--
gene-robo1	robo1	3.309693	664	5.011488	1044	5.991712000000001	1527	1.598811	376	1.415537	360	1.636041	365	9.82833769390205e-05	-1.33565367990191	down	[M]	Cell wall/membrane/envelope biogenesis	Biological Process: endocardial progenitor cell migration to the midline involved in heart field formation (GO:0003262);; Molecular Function: axon guidance receptor activity (GO:0008046);; Biological Process: axon midline choice point recognition (GO:0016199);; Biological Process: Roundabout signaling pathway (GO:0035385);;	K06753|0.0e+00|sdu:111232299|K06753 roundabout, axon guidance receptor 1 | (RefSeq) robo1; roundabout homolog 1	--	[T]	Signal transduction mechanisms	Immunoglobulin I-set domain	Peroxidasin OS=Xenopus tropicalis OX=8364 GN=pxdn PE=2 SV=1	T	Signal transduction mechanisms	roundabout homolog 1 isoform X4 [Amphiprion ocellaris]	biological process: cellular process (GO:0009987);; biological process: multicellular organismal process (GO:0032501);; biological process: developmental process (GO:0032502);; biological process: locomotion (GO:0040011);; biological process: single-organism process (GO:0044699);; biological process: localization (GO:0051179);; biological process: signaling (GO:0023052);; biological process: resp…
gene-atf3	atf3	37.966335	3436	44.543011	4167	14.444806	1630	8.340602	888	6.613868	744	7.209142	741	0.000239108059627889	-1.60571177547322	down	--	--	Molecular Function: DNA binding (GO:0003677);; Molecular Function: transcription factor activity, sequence-specific DNA binding (GO:0003700);; Cellular Component: nucleus (GO:0005634);; Biological Process: regulation of transcription from RNA polymerase II promoter (GO:0006357);;	K09032|4.6e-103|sdu:111231750|K09032 activating transcription factor 3 | (RefSeq) atf3; cyclic AMP-dependent transcription factor ATF-3	--	[K]	Transcription	bZIP transcription factor	Jun dimerization protein 2 OS=Danio rerio OX=7955 GN=jdp2 PE=2 SV=1	K	Transcription	cyclic AMP-dependent transcription factor ATF-3 [Seriola dumerili]	molecular function: binding (GO:0005488);; biological process: biological regulation (GO:0065007);; molecular function: nucleic acid binding transcription factor activity (GO:0001071);; cellular component: cell (GO:0005623);; cellular component: organelle (GO:0043226);; cellular component: cell part (GO:0044464)
gene-gja4	gja4	4.93914	377	4.759715	375	2.545453	242	1.489105	134	1.182692	112	1.361571	118	0.00335406483404305	-1.24330344941925	down	--	--	--	K07613|1.7e-142|ncc:104952716|K07613 gap junction alpha-4 protein | (RefSeq) gap junction alpha-6 protein-like	--	--	--	Connexin	Gap junction alpha-4 protein OS=Xenopus laevis OX=8355 GN=gja4 PE=2 SV=2	S	Function unknown	hypothetical protein PFLUV_G00153790 [Perca fluviatilis]	--
gene-prelid3b	prelid3b	10.94472	925	12.188558	1065	3.335576	352	1.585885	158	1.546516	163	1.074189	104	9.21142918276884e-05	-1.85123328107761	down	--	--	Cellular Component: mitochondrial intermembrane space (GO:0005758);;	--	--	[U]	Intracellular trafficking, secretion, and vesicular transport	PRELI-like family	PRELI domain containing protein 3A OS=Xenopus laevis OX=8355 GN=prelid3a PE=2 SV=1	U	Intracellular trafficking, secretion, and vesicular transport	PRELI domain containing protein 3B-like [Seriola dumerili]	cellular component: cell (GO:0005623);; cellular component: membrane-enclosed lumen (GO:0031974);; cellular component: organelle (GO:0043226);; cellular component: organelle part (GO:0044422);; cellular component: cell part (GO:0044464)
gene-mych	mych	13.599851000000001	1474	11.81949	1326	16.562587999999998	2049	3.4241989999999998	441	3.7219610000000003	531	3.2861900000000004	407	1.49680068880845e-09	-1.62784048210174	down	--	--	Molecular Function: DNA binding (GO:0003677);; Molecular Function: transcription factor activity, sequence-specific DNA binding (GO:0003700);; Cellular Component: nucleus (GO:0005634);; Cellular Component: host cell nucleus (GO:0042025);; Molecular Function: protein dimerization activity (GO:0046983);;	K04377|4.3e-143|lcf:108874403|K04377 Myc proto-oncogene protein | (RefSeq) transcriptional regulator Myc-2-like	MAPK signaling pathway (ko04010);; ErbB signaling pathway (ko04012);; Cell cycle (ko04110);; Cellular senescence (ko04218);; Wnt signaling pathway (ko04310);; TGF-beta signaling pathway (ko04350);; Salmonella infection (ko05132)	--	--	Helix-loop-helix DNA-binding domain	Transcriptional regulator Myc-2 OS=Cyprinus carpio OX=7962 GN=mycb PE=3 SV=1	K	Transcription	myelocytomatosis oncogene homolog [Epinephelus lanceolatus]	molecular function: binding (GO:0005488);; biological process: biological regulation (GO:0065007);; molecular function: nucleic acid binding transcription factor activity (GO:0001071);; cellular component: cell (GO:0005623);; cellular component: organelle (GO:0043226);; cellular component: cell part (GO:0044464);; cellular component: other organism (GO:0044215);; cellular component: other organis…
gene-rhbg	rhbg	3.836675	227	1.723156	106	2.333795	172	0.028836	3	0.0	0	0.149245	10	9.26883553661373e-10	-2.92619502882641	down	[P]	Inorganic ion transport and metabolism	Molecular Function: molecular_function (GO:0003674);; Molecular Function: transporter activity (GO:0005215);; Molecular Function: binding (GO:0005488);; Molecular Function: protein binding (GO:0005515);; Cellular Component: cellular_component (GO:0005575);; Cellular Component: intracellular (GO:0005622);; Cellular Component: cell (GO:0005623);; Cellular Component: cytoplasm (GO:0005737);; Cellula…	K06580|1.2e-235|lco:109137121|K06580 ammonium transporter Rh | (RefSeq) ammonium transporter Rh type B	--	[UR]	Intracellular trafficking, secretion, and vesicular transport;; General function prediction only	Ammonium Transporter Family	Ammonium transporter Rh type B OS=Takifugu rubripes OX=31033 GN=rhbg PE=1 SV=1	U	Intracellular trafficking, secretion, and vesicular transport	ammonium transporter Rh type B [Sparus aurata]	molecular function: transporter activity (GO:0005215);; molecular function: binding (GO:0005488);; cellular component: cell (GO:0005623);; cellular component: cell part (GO:0044464);; cellular component: organelle (GO:0043226);; cellular component: membrane (GO:0016020);; cellular component: membrane part (GO:0044425);; biological process: localization (GO:0051179);; cellular component: organelle…
gene-wu:fb18f06	wu:fb18f06	53.394779	904	62.993938	1103	53.27684	1124	145.120026	2889	114.345016	2404	84.693062	1628	0.00670187318418788	1.04041828677385	up	--	--	--	--	--	--	--	--	--	--	--	--	--
gene-LOC119900507	LOC119900507	81.908279	4195	82.878265	4387	57.795357	3690	13.320529	803	32.063313	2040	13.976621	813	0.00562321614990328	-1.36012425651582	down	--	--	Biological Process: angiogenesis (GO:0001525);; Cellular Component: extracellular space (GO:0005615);; Biological Process: negative regulation of apoptotic process (GO:0043066);;	K08767|2.3e-183|sdu:111217267|K08767 angiopoietin-like 4 | (RefSeq) angiopoietin-related protein 4-like	PPAR signaling pathway (ko03320)	[R]	General function prediction only	Fibrinogen beta and gamma chains, C-terminal globular domain	Fibrinogen C domain-containing protein 1 OS=Xenopus tropicalis OX=8364 GN=fibcd1 PE=2 SV=1	S	Function unknown	angiopoietin-related protein 4-like [Seriola dumerili]	biological process: developmental process (GO:0032502);; biological process: single-organism process (GO:0044699);; cellular component: extracellular region (GO:0005576);; cellular component: extracellular region part (GO:0044421);; biological process: biological regulation (GO:0065007)
gene-hspa1b	hspa1b	36.105652	2287	49.413776	3235	9.35562	739	1.779641	133	1.149568	91	2.680137	193	5.16563703371815e-10	-2.7641237460674	down	[O]	Posttranslational modification, protein turnover, chaperones	Molecular Function: ATP binding (GO:0005524);;	K03283|0.0e+00|lco:104926754|K03283 heat shock 70kDa protein 1/2/6/8 | (RefSeq) heat shock 70 kDa protein	Spliceosome (ko03040);; MAPK signaling pathway (ko04010);; Protein processing in endoplasmic reticulum (ko04141);; Endocytosis (ko04144)	[O]	Posttranslational modification, protein turnover, chaperones	Hsp70 protein	Heat shock 70 kDa protein OS=Oncorhynchus tshawytscha OX=74940 GN=hsp70 PE=2 SV=1	O	Posttranslational modification, protein turnover, chaperones	heat shock 70 kDa protein-like [Sparus aurata]	molecular function: binding (GO:0005488)
gene-LOC119888493	LOC119888493	0.581315	69	0.583451	71	0.465322	69	0.062544	9	0.029855	5	0.162465	22	0.00277703370272416	-1.66506184446269	down	--	--	Biological Process: regulation of cyclin-dependent protein serine/threonine kinase activity (GO:0000079);; Biological Process: microtubule cytoskeleton organization (GO:0000226);; Biological Process: mitotic cell cycle (GO:0000278);; Biological Process: embryonic axis specification (GO:0000578);; Biological Process: in utero embryonic development (GO:0001701);; Biological Process: embryonic epith…	K16724|0.0e+00|sdu:111236207|K16724 SCL-interrupting locus protein | (RefSeq) stil; SCL-interrupting locus protein	--	--	--	SCL-interrupting locus protein N-terminus	SCL-interrupting locus protein homolog OS=Danio rerio OX=7955 GN=stil PE=1 SV=2	S	Function unknown	SCL-interrupting locus protein homolog isoform X2 [Epinephelus lanceolatus]	biological process: biological regulation (GO:0065007);; biological process: cellular process (GO:0009987);; biological process: cellular component organization or biogenesis (GO:0071840);; biological process: single-organism process (GO:0044699);; biological process: multicellular organismal process (GO:0032501);; biological process: developmental process (GO:0032502);; cellular component: cell …
gene-si:dkey-243k1.3	si:dkey-243k1.3	1.159775	39	0.980102	34	4.909324	203	0.107757	5	0.095869	4	0.0	0	0.000856574487230418	-1.90058189815145	down	[F]	Nucleotide transport and metabolism	Molecular Function: nucleic acid binding (GO:0003676);; Molecular Function: hydrolase activity (GO:0016787);; Molecular Function: metal ion binding (GO:0046872);;	K15049|6.5e-35|asn:112548719|K15049 endonuclease domain-containing 1 protein | (RefSeq) endonuclease domain-containing 1 protein-like	--	--	--	DNA/RNA non-specific endonuclease	--	S	Function unknown	Endonuclease G, mitochondrial [Larimichthys crocea]	molecular function: binding (GO:0005488);; molecular function: catalytic activity (GO:0003824)
gene-si:dkey-30c15.10	si:dkey-30c15.10	4.333881	652	3.052154	427	4.839152999999999	785	10.707690999999999	1741	8.102041999999999	1241	7.032577	1164	0.00683448902310184	1.0505300563592	up	--	--	--	K18621|0.0e+00|lcf:108901975|K18621 actin-binding protein anillin | (RefSeq) LOW QUALITY PROTEIN: actin-binding protein anillin-like	--	[DZ]	Cell cycle control, cell division, chromosome partitioning;; Cytoskeleton	Cell division protein anillin	Anillin OS=Xenopus laevis OX=8355 GN=anln PE=1 SV=1	T	Signal transduction mechanisms	uncharacterized protein si:dkey-30c15.10 isoform X1 [Epinephelus lanceolatus]	--
gene-LOC119910748	LOC119910748	7.135095	274	22.336196	896	4.389178	213	0.393615	18	1.166944	57	0.418883	19	9.95351096090624e-06	-2.26806371428579	down	[P]	Inorganic ion transport and metabolism	Molecular Function: gamma-glutamylcyclotransferase activity (GO:0003839);; Biological Process: glutathione catabolic process (GO:0006751);;	K07232|2.0e-98|sdu:111225503|K07232 glutathione-specific gamma-glutamylcyclotransferase [EC:4.3.2.7] | (RefSeq) glutathione-specific gamma-glutamylcyclotransferase 1-like	Glutathione metabolism (ko00480)	[P]	Inorganic ion transport and metabolism	ChaC-like protein	Glutathione-specific gamma-glutamylcyclotransferase 1 OS=Danio rerio OX=7955 GN=chac1 PE=3 SV=1	P	Inorganic ion transport and metabolism	glutathione-specific gamma-glutamylcyclotransferase 1-like isoform X1 [Morone saxatilis]	molecular function: catalytic activity (GO:0003824);; biological process: metabolic process (GO:0008152);; biological process: cellular process (GO:0009987)
gene-hoga1	hoga1	2.866155	166	2.557576	153	2.770122	200	7.627361	519	4.98027	358	5.544264	365	0.000737153604567843	1.153773225274	up	[EM]	Amino acid transport and metabolism;; Cell wall/membrane/envelope biogenesis	Molecular Function: molecular_function (GO:0003674);; Molecular Function: catalytic activity (GO:0003824);; Molecular Function: binding (GO:0005488);; Molecular Function: protein binding (GO:0005515);; Cellular Component: cellular_component (GO:0005575);; Cellular Component: intracellular (GO:0005622);; Cellular Component: cell (GO:0005623);; Cellular Component: cytoplasm (GO:0005737);; Cellular …	K18123|4.0e-169|lco:104930035|K18123 4-hydroxy-2-oxoglutarate aldolase [EC:4.1.3.16] | (RefSeq) hoga1; 4-hydroxy-2-oxoglutarate aldolase, mitochondrial	Arginine and proline metabolism (ko00330);; Glyoxylate and dicarboxylate metabolism (ko00630)	--	--	Dihydrodipicolinate synthetase family	4-hydroxy-2-oxoglutarate aldolase, mitochondrial OS=Danio rerio OX=7955 GN=zgc:77082 PE=2 SV=1	T	Signal transduction mechanisms	4-hydroxy-2-oxoglutarate aldolase, mitochondrial [Anarrhichthys ocellatus]	molecular function: catalytic activity (GO:0003824);; molecular function: binding (GO:0005488);; cellular component: cell (GO:0005623);; cellular component: cell part (GO:0044464);; cellular component: organelle (GO:0043226);; cellular component: membrane-enclosed lumen (GO:0031974);; cellular component: organelle part (GO:0044422);; biological process: metabolic process (GO:0008152);; biological…
gene-LOC119883089	LOC119883089	2.603976	571	4.316938	978	3.24043	886	1.192405	308	1.058987	289	0.914253	228	0.000118646689728085	-1.35363839622536	down	--	--	Biological Process: negative regulation of transcription from RNA polymerase II promoter (GO:0000122);; Biological Process: polysaccharide biosynthetic process (GO:0000271);; Molecular Function: transcription regulatory region sequence-specific DNA binding (GO:0000976);; Molecular Function: RNA polymerase II regulatory region sequence-specific DNA binding (GO:0000977);; Molecular Function: RNA po…	K02633|0.0e+00|kmr:108239359|K02633 period circadian protein 2 | (RefSeq) period circadian protein homolog 2	--	[T]	Signal transduction mechanisms	Period protein 2/3C-terminal region	Period circadian protein homolog 2 OS=Gallus gallus OX=9031 GN=PER2 PE=2 SV=1	T	Signal transduction mechanisms	period circadian protein homolog 2-like [Morone saxatilis]	biological process: biological regulation (GO:0065007);; biological process: metabolic process (GO:0008152);; biological process: single-organism process (GO:0044699);; molecular function: binding (GO:0005488);; molecular function: transcription factor activity, protein binding (GO:0000988);; biological process: response to stimulus (GO:0050896);; biological process: multicellular organismal proc…
gene-si:dkey-242g16.2	si:dkey-242g16.2	2.638373	107	3.076561	128	1.280064	65	0.346328	17	0.475209	24	0.429651	20	0.000867213254539181	-1.68181290921303	down	--	--	Molecular Function: protein binding (GO:0005515);;	K07189|7.5e-142|sdu:111237504|K07189 protein phosphatase 1 regulatory subunit 3A/B/C/D/E | (RefSeq) protein phosphatase 1 regulatory subunit 3C-B-like	Insulin signaling pathway (ko04910)	[OT]	Posttranslational modification, protein turnover, chaperones;; Signal transduction mechanisms	Carbohydrate/starch-binding module (family 21)	Protein phosphatase 1 regulatory subunit 3C-B OS=Danio rerio OX=7955 GN=ppp1r3cb PE=2 SV=1	--	--	protein phosphatase 1 regulatory subunit 3C-B [Morone saxatilis]	molecular function: binding (GO:0005488)
gene-sc5d	sc5d	13.251908	1055	6.586458	542	13.799478	1370	60.038455	5628	24.877768	2460	29.677754	2685	0.00102557773706475	1.51452739008987	up	[I]	Lipid transport and metabolism	Molecular Function: iron ion binding (GO:0005506);; Biological Process: lipid biosynthetic process (GO:0008610);; Cellular Component: integral component of membrane (GO:0016021);; Molecular Function: oxidoreductase activity (GO:0016491);;	K00227|3.9e-171|lcf:108891924|K00227 Delta7-sterol 5-desaturase [EC:1.14.19.20] | (RefSeq) sc5d; lathosterol oxidase	Steroid biosynthesis (ko00100)	[I]	Lipid transport and metabolism	Fatty acid hydroxylase superfamily	--	I	Lipid transport and metabolism	PREDICTED: lathosterol oxidase [Lates calcarifer]	molecular function: binding (GO:0005488);; biological process: metabolic process (GO:0008152);; biological process: single-organism process (GO:0044699);; cellular component: membrane (GO:0016020);; cellular component: membrane part (GO:0044425);; molecular function: catalytic activity (GO:0003824)
gene-LOC119895561	LOC119895561	265.160858	19548	323.069763	24618	158.305984	14548	14.713104	1276	7.44149	682	30.593403	2561	1.05198126102314e-12	-2.86435782368702	down	--	--	Biological Process: ameboidal-type cell migration (GO:0001667);; Biological Process: embryonic development via the syncytial blastoderm (GO:0001700);; Molecular Function: nucleic acid binding (GO:0003676);; Biological Process: movement of cell or subcellular component (GO:0006928);; Biological Process: cell communication (GO:0007154);; Biological Process: cell-cell signaling (GO:0007267);; Biolog…	K09203|1.8e-149|lco:104926130|K09203 early growth response protein 1 | (RefSeq) early growth response protein 1	Apelin signaling pathway (ko04371);; GnRH signaling pathway (ko04912)	[R]	General function prediction only	Zinc-finger double domain	Early growth response protein 1 OS=Danio rerio OX=7955 GN=egr1 PE=2 SV=2	K	Transcription	early growth response protein 1-like [Sparus aurata]	biological process: cellular process (GO:0009987);; biological process: locomotion (GO:0040011);; biological process: single-organism process (GO:0044699);; biological process: localization (GO:0051179);; biological process: multicellular organismal process (GO:0032501);; biological process: developmental process (GO:0032502);; molecular function: binding (GO:0005488);; biological process: signal…
gene-LOC119918306	LOC119918306	12.723299	1337	13.446712	1461	8.216872	1077	3.962213	490	1.628037	213	3.527853	421	0.000170528418574258	-1.51540239353323	down	--	--	Cellular Component: integral component of membrane (GO:0016021);;	K14207|1.1e-221|lco:104922650|K14207 solute carrier family 38 (sodium-coupled neutral amino acid transporter), member 2 | (RefSeq) sodium-coupled neutral amino acid transporter 2	--	[E]	Amino acid transport and metabolism	Transmembrane amino acid transporter protein	Sodium-coupled neutral amino acid transporter 2 OS=Danio rerio OX=7955 GN=slc38a2 PE=3 SV=1	E	Amino acid transport and metabolism	sodium-coupled neutral amino acid transporter 2 [Epinephelus lanceolatus]	cellular component: membrane (GO:0016020);; cellular component: membrane part (GO:0044425)
gene-LOC119886403	LOC119886403	3.562829	97	1.033527	30	8.553016	290	0.574556	19	0.117465	4	0.245968	8	0.0022510630912478	-1.7910833113046	down	[O]	Posttranslational modification, protein turnover, chaperones	Molecular Function: serine-type endopeptidase activity (GO:0004252);; Biological Process: proteolysis (GO:0006508);;	K01326|4.5e-134|lco:104922034|K01326 pancreatic elastase I [EC:3.4.21.36] | (RefSeq) elastase-1 isoform X2	--	[E]	Amino acid transport and metabolism	Trypsin	Elastase-1 OS=Salmo salar OX=8030 PE=1 SV=1	E	Amino acid transport and metabolism	elastase-1-like [Morone saxatilis]	biological process: metabolic process (GO:0008152);; molecular function: catalytic activity (GO:0003824)
gene-LOC119907680	LOC119907680	7.254161	522	4.721117	352	12.166782	1092	61.265942	5184	16.213234	1449	18.725981	1530	0.0076730655090729	1.4882954122266	up	[QV]	Secondary metabolites biosynthesis, transport and catabolism;; Defense mechanisms	Molecular Function: monooxygenase activity (GO:0004497);; Molecular Function: iron ion binding (GO:0005506);; Molecular Function: methyltransferase activity (GO:0008168);; Molecular Function: oxidoreductase activity, acting on paired donors, with incorporation or reduction of molecular oxygen (GO:0016705);; Molecular Function: heme binding (GO:0020037);; Biological Process: methylation (GO:003225…	K05917|3.8e-280|sdu:111222971|K05917 sterol 14alpha-demethylase [EC:1.14.14.154 1.14.15.36] | (RefSeq) lanosterol 14-alpha demethylase	Steroid biosynthesis (ko00100)	[Q]	Secondary metabolites biosynthesis, transport and catabolism	Cytochrome P450	Lanosterol 14-alpha demethylase OS=Danio rerio OX=7955 GN=cyp51 PE=1 SV=1	Q	Secondary metabolites biosynthesis, transport and catabolism	lanosterol 14-alpha demethylase [Siniperca chuatsi]	biological process: metabolic process (GO:0008152);; biological process: single-organism process (GO:0044699);; molecular function: catalytic activity (GO:0003824);; molecular function: binding (GO:0005488)
gene-LOC119918691	LOC119918691	7.711609	678	9.349863	849	8.753107	958	3.017283	312	2.255049	246	3.754807	375	3.49361520330489e-06	-1.28908572740918	down	--	--	--	--	--	--	--	--	--	--	--	--	--
gene-LOC119905566	LOC119905566	1.312344	88	1.31444	92	0.6931849999999999	58	0.223121	18	0.291076	25	0.274774	22	0.00895500046571183	-1.3969845974241	down	[H]	Coenzyme transport and metabolism	Molecular Function: 5-aminolevulinate synthase activity (GO:0003870);; Cellular Component: mitochondrial matrix (GO:0005759);; Biological Process: protoporphyrinogen IX biosynthetic process (GO:0006782);; Molecular Function: pyridoxal phosphate binding (GO:0030170);;	K00643|4.2e-305|sdu:111217420|K00643 5-aminolevulinate synthase [EC:2.3.1.37] | (RefSeq) 5-aminolevulinate synthase, nonspecific, mitochondrial-like	Glycine, serine and threonine metabolism (ko00260);; Porphyrin and chlorophyll metabolism (ko00860)	[H]	Coenzyme transport and metabolism	Aminotransferase class I and II	5-aminolevulinate synthase, nonspecific, mitochondrial OS=Opsanus tau OX=8068 GN=alas1 PE=2 SV=1	H	Coenzyme transport and metabolism	5-aminolevulinate synthase, nonspecific, mitochondrial-like isoform X1 [Epinephelus lanceolatus]	molecular function: catalytic activity (GO:0003824);; cellular component: cell (GO:0005623);; cellular component: membrane-enclosed lumen (GO:0031974);; cellular component: organelle (GO:0043226);; cellular component: organelle part (GO:0044422);; cellular component: cell part (GO:0044464);; biological process: metabolic process (GO:0008152);; biological process: cellular process (GO:0009987);; m…
gene-ier2b	ier2b	245.502014	10688	348.279846	15672	74.27832	4031	23.729658	1215	15.988423	865	27.543407	1362	5.90677769677621e-08	-2.37045978356323	down	--	--	Molecular Function: transcription regulatory region sequence-specific DNA binding (GO:0000976);; Molecular Function: RNA polymerase II regulatory region sequence-specific DNA binding (GO:0000977);; Molecular Function: RNA polymerase II transcription factor activity, sequence-specific DNA binding (GO:0000981);; Molecular Function: RNA polymerase II regulatory region DNA binding (GO:0001012);; Mole…	--	--	--	--	Immediate early response protein (IER)	Immediate early response gene 2 protein OS=Danio rerio OX=7955 GN=ier2 PE=1 SV=1	S	Function unknown	immediate early response 2b [Epinephelus lanceolatus]	molecular function: binding (GO:0005488);; biological process: biological regulation (GO:0065007);; molecular function: nucleic acid binding transcription factor activity (GO:0001071);; cellular component: cell (GO:0005623);; cellular component: cell part (GO:0044464);; cellular component: organelle (GO:0043226);; cellular component: organelle part (GO:0044422);; biological process: metabolic pro…
gene-LOC119897587	LOC119897587	10.883394	201	13.816873	264	16.265965	374	5.617609	122	4.892585	113	6.207586	130	0.00521700612528036	-1.03768555913077	down	--	--	Molecular Function: calcium ion binding (GO:0005509);; Molecular Function: transition metal ion binding (GO:0046914);;	K10159|1.1e-06|xma:102230797|K10159 toll-like receptor 2 | (RefSeq) toll-like receptor 2 type-2 isoform X1	Phagosome (ko04145);; Toll-like receptor signaling pathway (ko04620);; Salmonella infection (ko05132);; Herpes simplex virus 1 infection (ko05168)	--	--	S-100/ICaBP type calcium binding domain	Ictacalcin OS=Ictalurus punctatus OX=7998 PE=2 SV=1	--	--	ictacalcin-like [Seriola lalandi dorsalis]	molecular function: binding (GO:0005488)
gene-LOC119911473	LOC119911473	159.940704	7679	62.899227	3122	84.124817	5035	305.763489	17266	311.4711	18573	347.090302	18921	0.000166486452121946	1.50818652729239	up	--	--	Biological Process: system process (GO:0003008);; Molecular Function: molecular_function (GO:0003674);; Molecular Function: transporter activity (GO:0005215);; Molecular Function: lipid transporter activity (GO:0005319);; Molecular Function: long-chain fatty acid transporter activity (GO:0005324);; Molecular Function: binding (GO:0005488);; Molecular Function: fatty acid binding (GO:0005504);; Ce…	K08751|2.8e-65|sdu:111239076|K08751 fatty acid-binding protein 2, intestinal | (RefSeq) fatty acid-binding protein, intestinal-like	PPAR signaling pathway (ko03320)	[I]	Lipid transport and metabolism	Lipocalin / cytosolic fatty-acid binding protein family	Fatty acid-binding protein, intestinal OS=Xenopus laevis OX=8355 GN=fabp2 PE=2 SV=2	I	Lipid transport and metabolism	fatty acid-binding protein, intestinal-like [Epinephelus lanceolatus]	biological process: multicellular organismal process (GO:0032501);; molecular function: transporter activity (GO:0005215);; biological process: localization (GO:0051179);; biological process: single-organism process (GO:0044699);; molecular function: binding (GO:0005488);; cellular component: cell (GO:0005623);; cellular component: cell part (GO:0044464);; cellular component: membrane (GO:0016020…
gene-LOC119888723	LOC119888723	3.289618	245	7.333723	564	4.583383	425	0.454684	40	0.634573	59	1.226883	104	4.11355664001636e-06	-2.00659234433135	down	--	--	Molecular Function: molecular_function (GO:0003674);; Molecular Function: nucleic acid binding (GO:0003676);; Molecular Function: RNA binding (GO:0003723);; Molecular Function: binding (GO:0005488);; Molecular Function: protein binding (GO:0005515);; Cellular Component: cellular_component (GO:0005575);; Cellular Component: intracellular (GO:0005622);; Cellular Component: cell (GO:0005623);; Cellu…	K23213|5.0e-123|gja:107121681|K23213 paired amphipathic helix protein Sin3b | (RefSeq) NACHT domain- and WD repeat-containing protein 1-like	--	--	--	WD domain, G-beta repeat	--	S	Function unknown	NACHT domain- and WD repeat-containing protein 1-like [Cottoperca gobio]	molecular function: binding (GO:0005488);; cellular component: cell (GO:0005623);; cellular component: cell part (GO:0044464);; cellular component: organelle (GO:0043226);; cellular component: macromolecular complex (GO:0032991);; cellular component: organelle part (GO:0044422);; biological process: metabolic process (GO:0008152);; biological process: cellular process (GO:0009987)
gene-ptgfr	ptgfr	2.361024	164	1.51982	109	1.1701	101	0.110041	9	0.265131	23	0.196991	16	6.98687133576935e-06	-2.11040506627944	down	--	--	Biological Process: reproduction (GO:0000003);; Biological Process: response to acid chemical (GO:0001101);; Biological Process: response to molecule of bacterial origin (GO:0002237);; Molecular Function: molecular_function (GO:0003674);; Molecular Function: transmembrane signaling receptor activity (GO:0004888);; Molecular Function: G-protein coupled receptor activity (GO:0004930);; Molecular Fu…	K04262|1.3e-176|lco:104918494|K04262 prostaglandin F receptor | (RefSeq) prostaglandin F2-alpha receptor	Calcium signaling pathway (ko04020);; Neuroactive ligand-receptor interaction (ko04080)	[R]	General function prediction only	7 transmembrane receptor (rhodopsin family)	--	T	Signal transduction mechanisms	prostaglandin F2-alpha receptor [Morone saxatilis]	biological process: reproduction (GO:0000003);; biological process: response to stimulus (GO:0050896);; biological process: cellular process (GO:0009987);; biological process: signaling (GO:0023052);; biological process: single-organism process (GO:0044699);; biological process: biological regulation (GO:0065007);; molecular function: signal transducer activity (GO:0004871);; molecular function: …
gene-dok1a	dok1a	0.677222	86	0.515154	68	0.644869	102	0.03971	6	0.137784	22	0.107913	16	0.00111403033406256	-1.72280159569839	down	--	--	--	K14752|8.7e-219|lcf:108900103|K14752 docking protein 1 | (RefSeq) docking protein 1-like isoform X1	--	[T]	Signal transduction mechanisms	PTB domain (IRS-1 type)	Docking protein 3 OS=Gallus gallus OX=9031 GN=DOK3 PE=1 SV=1	T	Signal transduction mechanisms	docking protein 3-like [Morone saxatilis]	--
gene-slc25a35	slc25a35	5.513292	679	5.869151	747	7.060862	1083	1.946566	282	1.616535	248	3.698689	517	0.00935111387794305	-1.07903367201338	down	--	--	Cellular Component: integral component of membrane (GO:0016021);;	K15117|6.1e-157|sdu:111234610|K15117 solute carrier family 25, member 34/35 | (RefSeq) solute carrier family 25 member 35	--	[C]	Energy production and conversion	Mitochondrial carrier protein	Solute carrier family 25 member 35 OS=Danio rerio OX=7955 GN=slc25a35 PE=2 SV=1	C	Energy production and conversion	solute carrier family 25 member 35 [Morone saxatilis]	cellular component: membrane (GO:0016020);; cellular component: membrane part (GO:0044425)
Micropterus_salmoides_newGene_5888	--	4.4031590000000005	541	8.553478	1153	8.254944	1349	0.26694	45	1.565366	256	1.4605869999999999	219	0.00191486840746446	-1.68872935378942	down	[E]	Amino acid transport and metabolism	Molecular Function: molecular_function (GO:0003674);; Molecular Function: catalytic activity (GO:0003824);; Molecular Function: aminopeptidase activity (GO:0004177);; Biological Process: proteolysis (GO:0006508);; Biological Process: nitrogen compound metabolic process (GO:0006807);; Biological Process: biological_process (GO:0008150);; Biological Process: metabolic process (GO:0008152);; Molecul…	K23014|9.1e-171|lcf:108884619|K23014 inactive dipeptidyl peptidase 10 | (RefSeq) LOW QUALITY PROTEIN: inactive dipeptidyl peptidase 10-like	--	[O]	Posttranslational modification, protein turnover, chaperones	Dipeptidyl peptidase IV (DPP IV) N-terminal region	--	O	Posttranslational modification, protein turnover, chaperones	inactive dipeptidyl peptidase 10-like [Epinephelus lanceolatus]	molecular function: catalytic activity (GO:0003824);; biological process: metabolic process (GO:0008152)
gene-LOC119912548	LOC119912548	7.919463	263	5.729012	197	19.022995	787	62.224361	2427	45.207108	1862	24.85544	936	0.00268970023664473	1.57496842395351	up	--	--	--	--	--	--	--	--	--	--	--	uncharacterized protein LOC117245961 [Epinephelus lanceolatus]	--
gene-slc19a1	slc19a1	11.105262	1116	7.862761	817	11.452841999999999	1431	21.857965	2576	24.59134	3065	16.289731	1858	0.0076730655090729	1.05874142042538	up	--	--	Cellular Component: integral component of plasma membrane (GO:0005887);; Molecular Function: reduced folate carrier activity (GO:0008518);; Molecular Function: methotrexate transporter activity (GO:0015350);;	K14609|4.2e-248|sdu:111236696|K14609 solute carrier family 19 (folate transporter), member 1 | (RefSeq) slc19a1; folate transporter 1	--	[H]	Coenzyme transport and metabolism	Reduced folate carrier	--	H	Coenzyme transport and metabolism	folate transporter 1 [Seriola dumerili]	cellular component: cell (GO:0005623);; cellular component: membrane (GO:0016020);; cellular component: membrane part (GO:0044425);; cellular component: cell part (GO:0044464);; biological process: localization (GO:0051179);; molecular function: transporter activity (GO:0005215);; biological process: single-organism process (GO:0044699);; biological process: response to stimulus (GO:0050896)
gene-kl	kl	0.903564	85	0.971784	95	0.982244	115	2.68528	297	1.517216	177	2.838541	303	0.00123231765808632	1.23416997671142	up	[G]	Carbohydrate transport and metabolism	Molecular Function: hydrolase activity, hydrolyzing O-glycosyl compounds (GO:0004553);; Cellular Component: extracellular space (GO:0005615);; Biological Process: carbohydrate metabolic process (GO:0005975);; Biological Process: aging (GO:0007568);; Biological Process: insulin receptor signaling pathway (GO:0008286);; Biological Process: fibroblast growth factor receptor signaling pathway (GO:000…	K14756|0.0e+00|lcf:108893285|K14756 klotho [EC:3.2.1.31] | (RefSeq) kl; klotho	Pentose and glucuronate interconversions (ko00040)	[G]	Carbohydrate transport and metabolism	Glycosyl hydrolase family 1	--	G	Carbohydrate transport and metabolism	PREDICTED: klotho [Lates calcarifer]	molecular function: catalytic activity (GO:0003824);; cellular component: extracellular region (GO:0005576);; cellular component: extracellular region part (GO:0044421);; biological process: metabolic process (GO:0008152);; biological process: developmental process (GO:0032502);; biological process: single-organism process (GO:0044699);; biological process: cellular process (GO:0009987);; biologi…
gene-pfkfb3	pfkfb3	5.144781	491	4.126763	409	1.70011	203	0.910613	103	0.763744	91	1.068332	117	0.0022510630912478	-1.46625909902478	down	[E]	Amino acid transport and metabolism	Molecular Function: molecular_function (GO:0003674);; Molecular Function: catalytic activity (GO:0003824);; Molecular Function: 6-phosphofructo-2-kinase activity (GO:0003873);; Molecular Function: fructose-2,6-bisphosphate 2-phosphatase activity (GO:0004331);; Molecular Function: ATP binding (GO:0005524);; Cellular Component: cellular_component (GO:0005575);; Cellular Component: intracellular (GO…	K01103|4.2e-298|lcf:108874268|K01103 6-phosphofructo-2-kinase / fructose-2,6-biphosphatase 3 [EC:2.7.1.105 3.1.3.46] | (RefSeq) pfkfb3; 6-phosphofructo-2-kinase/fructose-2, 6-bisphosphatase 3 isoform X1	Fructose and mannose metabolism (ko00051)	[G]	Carbohydrate transport and metabolism	6-phosphofructo-2-kinase	6-phosphofructo-2-kinase/fructose-2,6-bisphosphatase OS=Lithobates catesbeianus OX=8400 PE=2 SV=1	G	Carbohydrate transport and metabolism	6-phosphofructo-2-kinase/fructose-2,6-bisphosphatase 3 isoform X3 [Sparus aurata]	molecular function: catalytic activity (GO:0003824);; biological process: metabolic process (GO:0008152);; biological process: cellular process (GO:0009987);; molecular function: binding (GO:0005488);; cellular component: cell (GO:0005623);; cellular component: cell part (GO:0044464);; cellular component: organelle (GO:0043226);; cellular component: organelle part (GO:0044422);; biological proces…
gene-tmtc2b	tmtc2b	2.254117	346	1.840596	298	3.015126	573	0.994897	179	0.976089	187	0.875419	155	0.00794286946926047	-1.03683195002145	down	[M]	Cell wall/membrane/envelope biogenesis	Cellular Component: integral component of membrane (GO:0016021);;	K23424|0.0e+00|sdu:111225256|K23424 protein O-mannosyl-transferase [EC:2.4.1.-] | (RefSeq) transmembrane and TPR repeat-containing protein 2-like	--	[R]	General function prediction only	Tetratricopeptide repeat	Protein O-mannosyl-transferase TMTC2 OS=Xenopus laevis OX=8355 GN=tmtc2 PE=2 SV=1	S	Function unknown	protein O-mannosyl-transferase TMTC2 [Morone saxatilis]	cellular component: membrane (GO:0016020);; cellular component: membrane part (GO:0044425)
gene-LOC119919384	LOC119919384	1.1655389999999999	51	0.455797	21	1.342587	72	3.275798	162	3.029636	162	3.13936	149	0.00738392497877448	1.36623741716247	up	[E]	Amino acid transport and metabolism	Molecular Function: molecular_function (GO:0003674);; Molecular Function: catalytic activity (GO:0003824);; Molecular Function: lyase activity (GO:0016829);; Molecular Function: carbon-oxygen lyase activity (GO:0016835);; Molecular Function: hydro-lyase activity (GO:0016836);;	K18384|2.4e-188|lco:104930547|K18384 trans-L-3-hydroxyproline dehydratase [EC:4.2.1.77] | (RefSeq) l3hypdh; trans-3-hydroxy-L-proline dehydratase	Arginine and proline metabolism (ko00330)	--	--	Proline racemase	Trans-L-3-hydroxyproline dehydratase OS=Xenopus tropicalis OX=8364 GN=l3hypdh PE=2 SV=1	E	Amino acid transport and metabolism	Trans-L-3-hydroxyproline dehydratase [Larimichthys crocea]	molecular function: catalytic activity (GO:0003824)
gene-pdia2	pdia2	0.662919	37	1.181746	67	8.595752	584	0.109008	7	0.1576	11	0.270332	17	0.00138286577637992	-1.84791474430642	down	[O]	Posttranslational modification, protein turnover, chaperones	Molecular Function: protein disulfide isomerase activity (GO:0003756);; Biological Process: cell redox homeostasis (GO:0045454);;	K09581|7.3e-235|lcf:108901678|K09581 protein disulfide-isomerase A2 [EC:5.3.4.1] | (RefSeq) protein disulfide-isomerase-like	--	[O]	Posttranslational modification, protein turnover, chaperones	Thioredoxin	Protein disulfide-isomerase OS=Gallus gallus OX=9031 GN=P4HB PE=1 SV=3	O	Posttranslational modification, protein turnover, chaperones	protein disulfide-isomerase A2 [Morone saxatilis]	molecular function: catalytic activity (GO:0003824);; biological process: cellular process (GO:0009987);; biological process: single-organism process (GO:0044699);; biological process: biological regulation (GO:0065007)
gene-syt8	syt8	7.970919	404	9.779016	512	10.127998	640	4.216529	251	3.366596	212	3.740462	215	0.000428980920623621	-1.0719970614131	down	--	--	Biological Process: exocytosis (GO:0006887);; Cellular Component: integral component of membrane (GO:0016021);;	K19908|4.1e-179|sdu:111235994|K19908 synaptotagmin-8 | (RefSeq) synaptotagmin-1-like	--	[TU]	Signal transduction mechanisms;; Intracellular trafficking, secretion, and vesicular transport	C2 domain	Synaptotagmin-1 OS=Anser cygnoid OX=8845 GN=SYT1 PE=2 SV=1	--	--	synaptotagmin-1-like [Seriola lalandi dorsalis]	biological process: cellular process (GO:0009987);; biological process: single-organism process (GO:0044699);; biological process: localization (GO:0051179);; cellular component: membrane (GO:0016020);; cellular component: membrane part (GO:0044425)
gene-jun	jun	147.84445	8973	234.584385	14715	106.874218	8081	13.747385000000001	982	13.762324999999999	1038	19.551786999999997	1346	1.55108699471751e-18	-2.80848237425221	down	--	--	Biological Process: reproduction (GO:0000003);; Biological Process: negative regulation of transcription from RNA polymerase II promoter (GO:0000122);; Biological Process: MAPK cascade (GO:0000165);; Cellular Component: nuclear chromosome (GO:0000228);; Biological Process: response to reactive oxygen species (GO:0000302);; Cellular Component: chromatin (GO:0000785);; Cellular Component: nuclear c…	K04448|8.6e-172|lco:104926010|K04448 transcription factor AP-1 | (RefSeq) transcription factor AP-1	MAPK signaling pathway (ko04010);; ErbB signaling pathway (ko04012);; Mitophagy - animal (ko04137);; Apoptosis (ko04210);; Wnt signaling pathway (ko04310);; Focal adhesion (ko04510);; Tight junction (ko04530);; Toll-like receptor signaling pathway (ko04620);; NOD-like receptor signaling pathway (ko04621);; C-type lectin receptor signaling pathway (ko04625);; GnRH signaling pathway (ko04912);; Sal…	[K]	Transcription	Jun-like transcription factor	Transcription factor AP-1 OS=Serinus canaria OX=9135 GN=JUN PE=2 SV=1	K	Transcription	transcription factor AP-1 [Larimichthys crocea]	biological process: reproduction (GO:0000003);; biological process: biological regulation (GO:0065007);; biological process: metabolic process (GO:0008152);; biological process: cellular process (GO:0009987);; biological process: signaling (GO:0023052);; biological process: single-organism process (GO:0044699);; biological process: response to stimulus (GO:0050896);; cellular component: cell (GO:…
gene-klf4	klf4	38.329174	2306	64.182381	3990	27.191177	2039	3.759823	266	2.608696	195	5.937721	406	1.66678821673415e-13	-2.69398013888863	down	--	--	Biological Process: negative regulation of transcription from RNA polymerase II promoter (GO:0000122);; Cellular Component: nuclear chromosome (GO:0000228);; Cellular Component: chromatin (GO:0000785);; Cellular Component: nuclear chromatin (GO:0000790);; Cellular Component: euchromatin (GO:0000791);; Molecular Function: transcription regulatory region sequence-specific DNA binding (GO:0000976);;…	K17846|1.7e-183|lco:104928402|K17846 krueppel-like factor 4 | (RefSeq) klf4; Krueppel-like factor 4 isoform X1	--	[R]	General function prediction only	Zinc finger, C2H2 type	Transcription factor Sp8 OS=Xenopus laevis OX=8355 GN=sp8 PE=2 SV=1	K	Transcription	Krueppel-like factor 4 isoform X1 [Larimichthys crocea]	biological process: biological regulation (GO:0065007);; cellular component: cell (GO:0005623);; cellular component: organelle (GO:0043226);; cellular component: organelle part (GO:0044422);; cellular component: cell part (GO:0044464);; cellular component: membrane-enclosed lumen (GO:0031974);; molecular function: binding (GO:0005488);; molecular function: nucleic acid binding transcription facto…
Micropterus_salmoides_newGene_3304	--	0.506883	30	0.7251059999999999	44	2.0324540000000004	117	4.24379	281	1.811578	127	5.647814	353	0.00882932489975483	1.45749323531926	up	--	--	--	K09228|4.9e-39|lco:109142849|K09228 KRAB domain-containing zinc finger protein | (RefSeq) uncharacterized protein LOC109142849 isoform X1	Herpes simplex virus 1 infection (ko05168)	--	--	--	--	B	Chromatin structure and dynamics	uncharacterized protein LOC118330824 isoform X2 [Morone saxatilis]	--
gene-sgk2b	sgk2b	3.824889	182	9.275946	457	1.600409	96	0.543687	31	0.623863	37	0.495035	27	0.000276410417090216	-1.92028472373024	down	[T]	Signal transduction mechanisms	Molecular Function: protein kinase activity (GO:0004672);; Molecular Function: ATP binding (GO:0005524);; Biological Process: protein phosphorylation (GO:0006468);;	K13302|1.9e-200|lco:104923042|K13302 serum/glucocorticoid-regulated kinase 1 [EC:2.7.11.1] | (RefSeq) serine/threonine-protein kinase Sgk1 isoform X1	FoxO signaling pathway (ko04068);; mTOR signaling pathway (ko04150)	[RT]	General function prediction only;; Signal transduction mechanisms	Protein kinase domain	Serine/threonine-protein kinase Sgk1 OS=Gallus gallus OX=9031 GN=SGK1 PE=2 SV=1	T	Signal transduction mechanisms	serine/threonine-protein kinase Sgk1 isoform X1 [Larimichthys crocea]	biological process: metabolic process (GO:0008152);; biological process: cellular process (GO:0009987);; molecular function: catalytic activity (GO:0003824);; molecular function: binding (GO:0005488)
gene-pdzrn4	pdzrn4	0.87763	294	0.83686	290	0.745979	312	0.185779	74	0.225143	94	0.334033	127	4.20954248251498e-05	-1.41007833667701	down	--	--	Molecular Function: protein binding (GO:0005515);;	K15682|0.0e+00|lcf:108888934|K15682 ligand of Numb protein X 3/4 [EC:2.3.2.27] | (RefSeq) PDZ domain-containing RING finger protein 4-like	--	[S]	Function unknown	PDZ domain	E3 ubiquitin-protein ligase PDZRN3-B OS=Danio rerio OX=7955 GN=pdzrn3b PE=1 SV=1	S	Function unknown	PREDICTED: PDZ domain-containing RING finger protein 4-like [Lates calcarifer]	molecular function: binding (GO:0005488)
gene-LOC119899726	LOC119899726	17.354609	1597	17.487144	1664	12.737833	1461	3.207987	348	5.257505	601	4.701396	492	8.33761255390253e-06	-1.50403902764609	down	--	--	Biological Process: negative regulation of transcription from RNA polymerase II promoter (GO:0000122);; Cellular Component: ubiquitin ligase complex (GO:0000151);; Cellular Component: nuclear ubiquitin ligase complex (GO:0000152);; Molecular Function: regulatory region nucleic acid binding (GO:0001067);; Molecular Function: molecular_function (GO:0003674);; Molecular Function: nucleic acid bindin…	K11452|7.1e-254|lco:104921555|K11452 chromobox protein 4 [EC:2.3.2.-] | (RefSeq) cbx4; E3 SUMO-protein ligase CBX4	--	[B]	Chromatin structure and dynamics	Chromo (CHRromatin Organisation MOdifier) domain	--	B	Chromatin structure and dynamics	E3 SUMO-protein ligase CBX4 [Sparus aurata]	biological process: biological regulation (GO:0065007);; cellular component: cell (GO:0005623);; cellular component: macromolecular complex (GO:0032991);; cellular component: cell part (GO:0044464);; cellular component: organelle (GO:0043226);; cellular component: organelle part (GO:0044422);; molecular function: binding (GO:0005488);; molecular function: transcription factor activity, protein bi…
gene-LOC119915332	LOC119915332	2.358684	162	3.055894	217	3.711111	318	5.579901	451	5.592472	477	6.80233	530	0.00469206288263975	1.00050529464055	up	[M]	Cell wall/membrane/envelope biogenesis	Cellular Component: outer membrane (GO:0019867);;	K07277|2.5e-273|lcf:108897498|K07277 outer membrane protein insertion porin family | (RefSeq) samm50; sorting and assembly machinery component 50 homolog	--	[R]	General function prediction only	Omp85 superfamily domain	Sorting and assembly machinery component 50 homolog B OS=Danio rerio OX=7955 GN=samm50b PE=2 SV=1	M	Cell wall/membrane/envelope biogenesis	PREDICTED: sorting and assembly machinery component 50 homolog [Lates calcarifer]	cellular component: membrane (GO:0016020)
gene-LOC119912524	LOC119912524	3.618749	423	3.814546	451	4.665104	678	22.020032	3279	19.933298	3139	4.156757	534	0.00777140834276818	1.5139810396442	up	--	--	--	K06712|1.5e-94|lcf:108902386|K06712 butyrophilin | (RefSeq) butyrophilin subfamily 3 member A2-like	--	--	--	Immunoglobulin V-set domain	CD276 antigen homolog OS=Xenopus laevis OX=8355 GN=cd276 PE=2 SV=1	T	Signal transduction mechanisms	butyrophilin subfamily 3 member A2-like isoform X1 [Epinephelus lanceolatus]	--
gene-per3	per3	26.253979	4326	29.355026	5000	19.874897	4083	8.33029	1615	8.014157	1640	10.013947	1874	1.19026726834965e-06	-1.2876970660774	down	--	--	Biological Process: photoperiodism (GO:0009648);; Biological Process: circadian regulation of gene expression (GO:0032922);;	K21945|0.0e+00|sdu:111221955|K21945 period circadian protein 3 | (RefSeq) period circadian protein homolog 3-like isoform X1	--	[T]	Signal transduction mechanisms	Period protein 2/3C-terminal region	Period circadian protein homolog 2 OS=Gallus gallus OX=9031 GN=PER2 PE=2 SV=1	T	Signal transduction mechanisms	period circadian protein homolog 3-like isoform X1 [Seriola dumerili]	biological process: response to stimulus (GO:0050896);; biological process: multicellular organismal process (GO:0032501);; biological process: single-organism process (GO:0044699);; biological process: rhythmic process (GO:0048511);; biological process: biological regulation (GO:0065007)
gene-dusp2	dusp2	7.074815	394	5.710186	329	3.227268	225	1.016211	67	0.348935	25	1.626173	103	0.000988510852843164	-1.68164397430087	down	[T]	Signal transduction mechanisms	Molecular Function: protein tyrosine phosphatase activity (GO:0004725);; Molecular Function: MAP kinase tyrosine/serine/threonine phosphatase activity (GO:0017017);;	K04459|1.5e-165|lcf:108881939|K04459 dual specificity MAP kinase phosphatase [EC:3.1.3.16 3.1.3.48] | (RefSeq) LOW QUALITY PROTEIN: dual specificity protein phosphatase 2-like	MAPK signaling pathway (ko04010)	[V]	Defense mechanisms	Dual specificity phosphatase, catalytic domain	Dual specificity protein phosphatase 4 OS=Gallus gallus OX=9031 GN=DUSP4 PE=2 SV=1	V	Defense mechanisms	dual specificity protein phosphatase 2 [Epinephelus lanceolatus]	biological process: metabolic process (GO:0008152);; biological process: cellular process (GO:0009987);; molecular function: catalytic activity (GO:0003824);; biological process: biological regulation (GO:0065007)
gene-gadd45aa	gadd45aa	36.289833	1480	52.412182	2209	28.550457	1451	10.153207	487	9.732846	493	11.987823	555	9.90028347880737e-07	-1.55970105638944	down	--	--	Cellular Component: nucleus (GO:0005634);; Biological Process: paraxial mesoderm development (GO:0048339);; Biological Process: regulation of cell cycle (GO:0051726);;	K04402|1.5e-84|tru:101074436|K04402 growth arrest and DNA-damage-inducible protein | (RefSeq) gadd45a; growth arrest and DNA damage-inducible protein GADD45 alpha	MAPK signaling pathway (ko04010);; FoxO signaling pathway (ko04068);; Cell cycle (ko04110);; p53 signaling pathway (ko04115);; Apoptosis (ko04210);; Cellular senescence (ko04218)	--	--	Ribosomal protein L7Ae/L30e/S12e/Gadd45 family	--	S	Function unknown	growth arrest and DNA-damage-inducible, alpha, a isoform X1 [Notolabrus celidotus]	cellular component: cell (GO:0005623);; cellular component: organelle (GO:0043226);; cellular component: cell part (GO:0044464);; biological process: multicellular organismal process (GO:0032501);; biological process: developmental process (GO:0032502);; biological process: single-organism process (GO:0044699);; biological process: biological regulation (GO:0065007)
gene-LOC119910347	LOC119910347	24.950142	675	26.186115	733	216.728073	7307	4.338521	138	4.847036	163	3.774601	116	9.01851592993069e-06	-2.30441865215509	down	[O]	Posttranslational modification, protein turnover, chaperones	Molecular Function: serine-type endopeptidase activity (GO:0004252);;	K01346|7.2e-140|lcf:108881697|K01346 pancreatic elastase II [EC:3.4.21.71] | (RefSeq) chymotrypsin-like elastase family member 2A	--	[E]	Amino acid transport and metabolism	Trypsin	Coagulation factor X OS=Gallus gallus OX=9031 GN=F10 PE=1 SV=1	E	Amino acid transport and metabolism	chymotrypsin-like elastase family member 1 [Sander lucioperca]	biological process: metabolic process (GO:0008152);; molecular function: catalytic activity (GO:0003824)
gene-rrad	rrad	65.767868	3481	48.208179	2638	14.842937	980	4.917059	307	5.168275	340	7.422904	447	5.11187272619701e-06	-2.05858525615403	down	--	--	Molecular Function: GTPase activity (GO:0003924);; Molecular Function: calcium channel regulator activity (GO:0005246);; Molecular Function: GTP binding (GO:0005525);; Biological Process: signal transduction (GO:0007165);; Cellular Component: membrane (GO:0016020);; Biological Process: negative regulation of high voltage-gated calcium channel activity (GO:1901842);;	K07845|1.7e-166|lcf:108887649|K07845 Ras-related associated with diabetes | (RefSeq) rrad; GTP-binding protein RAD	--	[R]	General function prediction only	Ras family	Ras-related protein O-RAL OS=Diplobatis ommata OX=1870830 PE=2 SV=1	S	Function unknown	PREDICTED: GTP-binding protein RAD [Stegastes partitus]	molecular function: catalytic activity (GO:0003824);; biological process: biological regulation (GO:0065007);; molecular function: molecular function regulator (GO:0098772);; molecular function: binding (GO:0005488);; biological process: cellular process (GO:0009987);; cellular component: membrane (GO:0016020)
gene-si:ch73-335l21.4	si:ch73-335l21.4	113.708458	4091	226.366882	8417	33.703037	1512	1.941201	83	3.180235	143	5.639069	231	1.98780964196599e-12	-3.18106485153377	down	--	--	--	--	--	--	--	Ring finger domain	--	O	Posttranslational modification, protein turnover, chaperones	RING finger protein 227 [Morone saxatilis]	--
gene-mlnl	mlnl	23.861703	492	20.810274	426	16.518671	409	57.821327	1385	43.585823999999995	1083	37.035728	854	0.00158320301713901	1.17686051374819	up	--	--	--	K05265|4.5e-11|lcm:102346893|K05265 motilin | (RefSeq) MLN; promotilin	Neuroactive ligand-receptor interaction (ko04080)	--	--	--	--	--	--	prepromotilin [Lateolabrax maculatus]	--
gene-LOC119893755	LOC119893755	1.677855	165	1.307101	133	1.264589	155	0.541258	63	0.463163	57	0.372708	42	0.00469206288263975	-1.23432655005203	down	[C]	Energy production and conversion	Molecular Function: oxoglutarate dehydrogenase (succinyl-transferring) activity (GO:0004591);; Biological Process: tricarboxylic acid cycle (GO:0006099);; Molecular Function: thiamine pyrophosphate binding (GO:0030976);;	K15791|0.0e+00|lco:104940683|K15791 probable 2-oxoglutarate dehydrogenase E1 component DHKTD1 [EC:1.2.4.2] | (RefSeq) dhtkd1; probable 2-oxoglutarate dehydrogenase E1 component DHKTD1, mitochondrial	Lysine degradation (ko00310);; Tryptophan metabolism (ko00380)	[G]	Carbohydrate transport and metabolism	Transketolase, pyrimidine binding domain	Probable 2-oxoglutarate dehydrogenase E1 component DHKTD1, mitochondrial OS=Danio rerio OX=7955 GN=dhtkd1 PE=2 SV=2	C	Energy production and conversion	probable 2-oxoglutarate dehydrogenase E1 component DHKTD1, mitochondrial [Morone saxatilis]	biological process: metabolic process (GO:0008152);; biological process: single-organism process (GO:0044699);; molecular function: catalytic activity (GO:0003824);; biological process: cellular process (GO:0009987);; molecular function: binding (GO:0005488)
gene-ebpl	ebpl	10.419385	353	8.415609	295	5.991756	253	19.184877	764	18.412281	775	14.857369	572	0.00762695949688396	1.07746265839785	up	--	--	Cellular Component: integral component of membrane (GO:0016021);; Biological Process: sterol metabolic process (GO:0016125);; Molecular Function: cholestenol delta-isomerase activity (GO:0047750);;	K11494|1.3e-35|sasa:106575507|K11494 RCC1 and BTB domain-containing protein | (RefSeq) RCC1 and BTB domain-containing protein 1-like	--	[I]	Lipid transport and metabolism	EXPERA (EXPanded EBP superfamily)	--	I	Lipid transport and metabolism	emopamil-binding protein-like [Morone saxatilis]	cellular component: membrane (GO:0016020);; cellular component: membrane part (GO:0044425);; biological process: metabolic process (GO:0008152);; biological process: single-organism process (GO:0044699);; molecular function: catalytic activity (GO:0003824)
gene-tac3b	tac3b	102.46656	1827	105.943939	1953	65.520386	1456	9.576226	201	26.650604	591	37.192387	753	0.00831071477413744	-1.36267591021006	down	--	--	--	--	--	--	--	--	--	--	--	TPA_inf: tachykinin 3 [Dicentrarchus labrax]	--
gene-spsb3a	spsb3a	3.9207019999999995	452	3.9223500000000002	479	2.983602	437	6.607708	911	6.309755	899	8.656848	1115	0.000328255332459706	1.02142674263288	up	--	--	Molecular Function: protein binding (GO:0005515);;	K10345|1.6e-214|lco:104929506|K10345 SPRY domain-containing SOCS box protein 3 | (RefSeq) SPRY domain-containing SOCS box protein 3	--	--	--	SPRY domain	SPRY domain-containing SOCS box protein 3 OS=Xenopus tropicalis OX=8364 GN=spsb3 PE=2 SV=1	S	Function unknown	SPRY domain-containing SOCS box protein 3a [Morone saxatilis]	molecular function: binding (GO:0005488)
gene-zgc:162816	zgc:162816	1.966168	88	1.6709520000000002	77	1.7364350000000002	97	4.751657	242	4.96971	272	3.246078	163	0.00562321614990328	1.19178330045291	up	[E]	Amino acid transport and metabolism	--	K23286|3.1e-29|gfr:102039151|K23286 neurobeachin-like protein 1/2 | (RefSeq) NBEAL2; neurobeachin like 2	--	--	--	Alanine racemase, N-terminal domain	--	E	Amino acid transport and metabolism	D-threo-3-hydroxyaspartate dehydratase [Morone saxatilis]	--
gene-slc16a13	slc16a13	4.002546000000001	276	3.271019	243	3.143231	276	15.0537	1208	11.302062	981	14.721466000000001	1145	3.85373237442035e-17	1.94332203320173	up	[G]	Carbohydrate transport and metabolism	Molecular Function: molecular_function (GO:0003674);; Molecular Function: transporter activity (GO:0005215);; Molecular Function: organic acid transmembrane transporter activity (GO:0005342);; Cellular Component: cellular_component (GO:0005575);; Cellular Component: intracellular (GO:0005622);; Cellular Component: cell (GO:0005623);; Cellular Component: cytoplasm (GO:0005737);; Cellular Component…	K08189|2.5e-217|lcf:108879989|K08189 MFS transporter, MCT family, solute carrier family 16 (monocarboxylic acid transporters), member 13 | (RefSeq) slc16a13; monocarboxylate transporter 13	--	[G]	Carbohydrate transport and metabolism	Major Facilitator Superfamily	Monocarboxylate transporter 12-B OS=Danio rerio OX=7955 GN=slc16a12b PE=2 SV=1	G	Carbohydrate transport and metabolism	monocarboxylate transporter 13 isoform X1 [Morone saxatilis]	molecular function: transporter activity (GO:0005215);; biological process: localization (GO:0051179);; cellular component: cell (GO:0005623);; cellular component: cell part (GO:0044464);; cellular component: organelle (GO:0043226);; cellular component: membrane (GO:0016020);; cellular component: membrane part (GO:0044425);; biological process: single-organism process (GO:0044699)
gene-cry1b	cry1b	9.266345	964	9.543639	1027	8.236708	1069	3.701067	453	3.317901	430	3.978886	471	1.93716083377627e-06	-1.10164355854424	down	[L]	Replication, recombination and repair	--	K02295|0.0e+00|lcf:108875411|K02295 cryptochrome | (RefSeq) cryptochrome-1-like	--	[LT]	Replication, recombination and repair;; Signal transduction mechanisms	FAD binding domain of DNA photolyase	Cryptochrome-1 OS=Gallus gallus OX=9031 GN=CRY1 PE=2 SV=1	--	--	cryptochrome-1-like isoform X1 [Echeneis naucrates]	--
gene-si:dkey-63b1.1	si:dkey-63b1.1	22.22575	1535	16.385883	1170	9.148808	788	3.620294	294	1.89386	163	4.682554	368	6.01981058604839e-05	-1.71035081052811	down	--	--	Molecular Function: bradykinin receptor activity (GO:0004947);; Cellular Component: integral component of membrane (GO:0016021);;	K03916|2.8e-179|sdu:111237291|K03916 bradykinin receptor B2 | (RefSeq) B2 bradykinin receptor-like	Calcium signaling pathway (ko04020);; Neuroactive ligand-receptor interaction (ko04080);; Regulation of actin cytoskeleton (ko04810)	--	--	7 transmembrane receptor (rhodopsin family)	Type-1 angiotensin II receptor A OS=Xenopus laevis OX=8355 GN=agtr1-a PE=2 SV=2	T	Signal transduction mechanisms	B2 bradykinin receptor-like [Cottoperca gobio]	biological process: cellular process (GO:0009987);; biological process: signaling (GO:0023052);; biological process: single-organism process (GO:0044699);; biological process: response to stimulus (GO:0050896);; biological process: biological regulation (GO:0065007);; molecular function: signal transducer activity (GO:0004871);; molecular function: molecular transducer activity (GO:0060089);; cel…
gene-LOC119915053	LOC119915053	1.445728	353	0.821559	207	1.185791	361	3.21039	920	2.217585	671	2.878813	797	0.000473735993042373	1.23815934891163	up	[Q]	Secondary metabolites biosynthesis, transport and catabolism	--	K08115|0.0e+00|sdu:111237490|K08115 chondroitin sulfate proteoglycan 4 | (RefSeq) chondroitin sulfate proteoglycan 4-like	--	[R]	General function prediction only	Cadherin-like	--	S	Function unknown	chondroitin sulfate proteoglycan 4-like isoform X1 [Sparus aurata]	--
gene-gjb10	gjb10	4.025254	219	5.85673	330	3.761018	255	1.254704	81	1.414323	96	1.093144	68	0.000215677334636643	-1.44797254717924	down	--	--	Cellular Component: connexin complex (GO:0005922);; Biological Process: cell communication (GO:0007154);; Cellular Component: integral component of membrane (GO:0016021);;	K07623|1.5e-134|lco:104919306|K07623 gap junction beta-4 protein | (RefSeq) gap junction beta-4 protein	--	--	--	Connexin	Gap junction beta-6 protein OS=Gallus gallus OX=9031 GN=GJB6 PE=2 SV=1	S	Function unknown	gap junction beta-4 protein [Larimichthys crocea]	cellular component: cell (GO:0005623);; cellular component: membrane (GO:0016020);; cellular component: macromolecular complex (GO:0032991);; cellular component: membrane part (GO:0044425);; cellular component: cell part (GO:0044464);; biological process: cellular process (GO:0009987)
gene-ncam3	ncam3	2.518706	264	2.622168	284	1.962681	257	0.318976	40	0.546696	72	0.595991	71	1.15583063852341e-06	-1.80217555594451	down	--	--	Biological Process: cell adhesion (GO:0007155);; Cellular Component: integral component of membrane (GO:0016021);;	K06491|1.9e-309|lcf:108888300|K06491 neural cell adhesion molecule | (RefSeq) neural cell adhesion molecule 1-like isoform X1	Cell adhesion molecules (ko04514)	[T]	Signal transduction mechanisms	Immunoglobulin I-set domain	Neural cell adhesion molecule 1 OS=Gallus gallus OX=9031 GN=NCAM1 PE=1 SV=3	T	Signal transduction mechanisms	neural cell adhesion molecule 1-like isoform X2 [Etheostoma spectabile]	biological process: biological adhesion (GO:0022610);; cellular component: membrane (GO:0016020);; cellular component: membrane part (GO:0044425)
gene-npas2	npas2	0.208791	35	0.172695	30	0.576522	120	1.769253	346	1.3976089999999999	289	0.9521780000000001	178	0.00294764198375851	1.58811681923127	up	--	--	Molecular Function: double-stranded DNA binding (GO:0003690);; Molecular Function: transcription factor activity, sequence-specific DNA binding (GO:0003700);; Cellular Component: nucleus (GO:0005634);; Cellular Component: transcription factor complex (GO:0005667);; Cellular Component: cytoplasm (GO:0005737);; Biological Process: circadian rhythm (GO:0007623);; Biological Process: photoperiodism (…	K09026|0.0e+00|sdu:111234344|K09026 neuronal PAS domain-containing protein 2 | (RefSeq) neuronal PAS domain-containing protein 2-like isoform X1	--	[K]	Transcription	PAS domain	Neuronal PAS domain-containing protein 2 OS=Gallus gallus OX=9031 GN=NPAS2 PE=1 SV=1	K	Transcription	neuronal PAS domain-containing protein 2 isoform X2 [Notolabrus celidotus]	molecular function: binding (GO:0005488);; biological process: biological regulation (GO:0065007);; molecular function: nucleic acid binding transcription factor activity (GO:0001071);; cellular component: cell (GO:0005623);; cellular component: organelle (GO:0043226);; cellular component: cell part (GO:0044464);; cellular component: macromolecular complex (GO:0032991);; biological process: rhyth…
gene-LOC119894241	LOC119894241	11.280318	323	6.107748	181	72.360457	2572	0.866481	30	1.014714	37	1.009358	33	1.54774954547276e-06	-2.46055975954859	down	[G]	Carbohydrate transport and metabolism	Molecular Function: metalloendopeptidase activity (GO:0004222);; Molecular Function: zinc ion binding (GO:0008270);;	K18543|5.6e-57|mze:101472880|K18543 choriolysin H [EC:3.4.24.67] | (RefSeq) high choriolytic enzyme 1-like	--	[O]	Posttranslational modification, protein turnover, chaperones	Astacin (Peptidase family M12A)	High choriolytic enzyme 1 OS=Oryzias latipes OX=8090 GN=hcea PE=1 SV=1	O	Posttranslational modification, protein turnover, chaperones	high choriolytic enzyme 2-like [Etheostoma cragini]	biological process: metabolic process (GO:0008152);; molecular function: catalytic activity (GO:0003824);; molecular function: binding (GO:0005488)
gene-LOC119912226	LOC119912226	0.674709	55	0.440138	37	0.537048	54	0.0	0	0.0	0	0.036473	4	4.61812667058978e-05	-2.18974102234521	down	--	--	--	K06560|1.8e-239|nfu:107376944|K06560 mannose receptor, C type | (RefSeq) uncharacterized protein LOC107376944	Phagosome (ko04145)	--	--	Lectin C-type domain	Collagen alpha-1(XIV) chain OS=Gallus gallus OX=9031 GN=COL14A1 PE=1 SV=2	--	--	PREDICTED: uncharacterized protein LOC107376944 [Nothobranchius furzeri]	--
gene-LOC119905600	LOC119905600	24.991756	778	12.507179	403	21.886438	849	47.171982	1727	40.762558	1576	38.483311	1360	0.00891267030900998	1.07499089260687	up	[O]	Posttranslational modification, protein turnover, chaperones	Biological Process: response to acid chemical (GO:0001101);; Biological Process: endothelial cell development (GO:0001885);; Biological Process: epithelial cell development (GO:0002064);; Biological Process: endothelium development (GO:0003158);; Molecular Function: molecular_function (GO:0003674);; Molecular Function: catalytic activity (GO:0003824);; Molecular Function: glutathione transferase …	K00799|8.4e-115|lcf:108876447|K00799 glutathione S-transferase [EC:2.5.1.18] | (RefSeq) glutathione S-transferase Mu 3-like	Glutathione metabolism (ko00480);; Metabolism of xenobiotics by cytochrome P450 (ko00980);; Drug metabolism - cytochrome P450 (ko00982);; Drug metabolism - other enzymes (ko00983)	[O]	Posttranslational modification, protein turnover, chaperones	Glutathione S-transferase, N-terminal domain	Glutathione S-transferase 2 OS=Gallus gallus OX=9031 GN=GSTM2 PE=1 SV=4	O	Posttranslational modification, protein turnover, chaperones	glutathione S-transferase Mu 3-like [Etheostoma spectabile]	biological process: response to stimulus (GO:0050896);; biological process: cellular process (GO:0009987);; biological process: developmental process (GO:0032502);; biological process: single-organism process (GO:0044699);; molecular function: catalytic activity (GO:0003824);; molecular function: binding (GO:0005488);; cellular component: extracellular region (GO:0005576);; cellular component: ce…
gene-LOC119905173	LOC119905173	5.392268	95	5.532522	101	3.388552	75	1.060605	22	0.403003	9	1.383597	28	0.00275656241842542	-1.58538398627882	down	--	--	--	K23284|3.6e-80|lco:104939814|K23284 C1q-related factor | (RefSeq) complement C1q-like protein 2	--	--	--	C1q domain	--	S	Function unknown	complement C1q-like protein 2 [Larimichthys crocea]	--
gene-lpin1	lpin1	4.116445000000001	730	13.209123	2416	2.812037	621	0.631953	130	1.2669380000000001	279	1.8139669999999999	365	0.00650222699549425	-1.54980990093056	down	--	--	--	K15728|0.0e+00|sdu:111219735|K15728 phosphatidate phosphatase LPIN [EC:3.1.3.4] | (RefSeq) phosphatidate phosphatase LPIN1-like isoform X1	Glycerolipid metabolism (ko00561);; Glycerophospholipid metabolism (ko00564);; mTOR signaling pathway (ko04150)	[NI]	Cell motility;; Lipid transport and metabolism	LNS2 (Lipin/Ned1/Smp2)	--	--	--	phosphatidate phosphatase LPIN1 isoform X5 [Epinephelus lanceolatus]	--
gene-LOC119898606	LOC119898606	5.662838	408	6.138484	457	5.485422	493	11.202446	949	11.561241	1034	10.459928	855	0.000322354329832413	1.01298720316607	up	--	--	--	K16805|1.2e-42|xla:108702758|K16805 protein FAM83D | (RefSeq) fam83d.S; family with sequence similarity 83 member D S homeolog	--	--	--	FAM83 A-H	Protein FAM83G OS=Xenopus laevis OX=8355 GN=fam83g PE=2 SV=1	S	Function unknown	protein FAM83F [Morone saxatilis]	--
gene-LOC119909126	LOC119909126	1031.889526	54794	1096.640747	60191	529.695496	35062	29.505491	1843	16.201242	1069	71.931862	4337	7.97005039605783e-16	-3.27625803189121	down	--	--	Molecular Function: double-stranded DNA binding (GO:0003690);; Molecular Function: transcription factor activity, sequence-specific DNA binding (GO:0003700);; Cellular Component: transcription factor complex (GO:0005667);; Biological Process: regulation of transcription from RNA polymerase II promoter (GO:0006357);; Biological Process: multicellular organismal response to stress (GO:0033555);;	K04379|7.9e-169|lcf:108895611|K04379 proto-oncogene protein c-fos | (RefSeq) proto-oncogene c-Fos-like	MAPK signaling pathway (ko04010);; Apoptosis (ko04210);; Toll-like receptor signaling pathway (ko04620);; Salmonella infection (ko05132)	[K]	Transcription	bZIP transcription factor	Proto-oncogene c-Fos OS=Takifugu rubripes OX=31033 GN=fos PE=3 SV=1	K	Transcription	v-fos FBJ murine osteosarcoma viral oncogene homolog Ab [Morone saxatilis]	molecular function: binding (GO:0005488);; biological process: biological regulation (GO:0065007);; molecular function: nucleic acid binding transcription factor activity (GO:0001071);; cellular component: cell (GO:0005623);; cellular component: macromolecular complex (GO:0032991);; cellular component: cell part (GO:0044464);; biological process: multicellular organismal process (GO:0032501);; bi…
gene-LOC119882049	LOC119882049	1.503763	52	0.433533	16	0.199511	9	13.177052	529	11.191169	475	3.877772	151	3.12510683812669e-05	2.18795044900372	up	--	--	Molecular Function: hydroxymethylglutaryl-CoA reductase (NADPH) activity (GO:0004420);; Cellular Component: endoplasmic reticulum membrane (GO:0005789);; Biological Process: isoprenoid biosynthetic process (GO:0008299);; Biological Process: coenzyme A metabolic process (GO:0015936);; Cellular Component: integral component of membrane (GO:0016021);; Molecular Function: NADP binding (GO:0050661);;	K00021|7.2e-182|lcf:108878542|K00021 hydroxymethylglutaryl-CoA reductase (NADPH) [EC:1.1.1.34] | (RefSeq) hmgcr; 3-hydroxy-3-methylglutaryl-Coenzyme A reductase	Terpenoid backbone biosynthesis (ko00900)	[I]	Lipid transport and metabolism	Sterol-sensing domain of SREBP cleavage-activation	3-hydroxy-3-methylglutaryl-coenzyme A reductase OS=Xenopus laevis OX=8355 GN=hmgcr PE=2 SV=1	I	Lipid transport and metabolism	3-hydroxy-3-methylglutaryl-CoA reductase a [Morone saxatilis]	biological process: metabolic process (GO:0008152);; biological process: single-organism process (GO:0044699);; molecular function: catalytic activity (GO:0003824);; cellular component: cell (GO:0005623);; cellular component: membrane (GO:0016020);; cellular component: organelle (GO:0043226);; cellular component: organelle part (GO:0044422);; cellular component: membrane part (GO:0044425);; cellu…
gene-dbpa	dbpa	16.539392	3091	15.747433	3042	15.281397	3560	4.416897	971	5.185112	1204	4.849113	1029	2.27016719597155e-10	-1.47769958172817	down	--	--	Molecular Function: transcription factor activity, sequence-specific DNA binding (GO:0003700);; Biological Process: regulation of transcription from RNA polymerase II promoter (GO:0006357);;	K09057|2.3e-168|lco:104924399|K09057 hepatic leukemia factor | (RefSeq) hepatic leukemia factor	--	[K]	Transcription	Basic region leucine zipper	Transcription factor VBP OS=Gallus gallus OX=9031 GN=TEF PE=1 SV=2	K	Transcription	PREDICTED: thyrotroph embryonic factor-like [Stegastes partitus]	biological process: biological regulation (GO:0065007);; molecular function: nucleic acid binding transcription factor activity (GO:0001071)
gene-cat	cat	59.053646	4678	34.928684	2860	43.116669	4258	127.843552	11911	131.154907	12904	94.393753	8490	0.00019800145645034	1.33880819179246	up	[P]	Inorganic ion transport and metabolism	Molecular Function: catalase activity (GO:0004096);; Biological Process: response to oxidative stress (GO:0006979);; Molecular Function: heme binding (GO:0020037);; Biological Process: hydrogen peroxide catabolic process (GO:0042744);; Molecular Function: metal ion binding (GO:0046872);;	K03781|1.3e-299|lcf:108883043|K03781 catalase [EC:1.11.1.6] | (RefSeq) cat; catalase	Tryptophan metabolism (ko00380);; Glyoxylate and dicarboxylate metabolism (ko00630);; Carbon metabolism (ko01200);; FoxO signaling pathway (ko04068);; Peroxisome (ko04146)	[P]	Inorganic ion transport and metabolism	Catalase	Catalase OS=Danio rerio OX=7955 GN=cat PE=2 SV=1	P	Inorganic ion transport and metabolism	catalase [Oplegnathus fasciatus]	biological process: metabolic process (GO:0008152);; biological process: cellular process (GO:0009987);; biological process: single-organism process (GO:0044699);; biological process: response to stimulus (GO:0050896);; biological process: detoxification (GO:0098754);; molecular function: catalytic activity (GO:0003824);; molecular function: antioxidant activity (GO:0016209);; molecular function:…
gene-noxo1a	noxo1a	1.411432	102	1.792706	134	1.724689	156	0.211542	18	0.288172	26	0.617764	51	0.00160751046701407	-1.55109245130109	down	--	--	Molecular Function: phosphatidylinositol binding (GO:0035091);;	K17934|1.0e-187|sdu:111227101|K17934 NADPH oxidase organizer 1 | (RefSeq) NADPH oxidase organizer 1-like	--	--	--	SH3 domain	--	T	Signal transduction mechanisms	NADPH oxidase organizer 1-like [Morone saxatilis]	molecular function: binding (GO:0005488)
gene-me1	me1	28.43152	1942	16.982313	1199	26.011873	2214	88.688011	7123	59.999416	5089	45.623436	3537	0.000867213254539181	1.35559834272513	up	[C]	Energy production and conversion	Molecular Function: malate dehydrogenase (decarboxylating) (NAD+) activity (GO:0004471);; Molecular Function: metal ion binding (GO:0046872);; Molecular Function: NAD binding (GO:0051287);;	K00029|0.0e+00|sdu:111227862|K00029 malate dehydrogenase (oxaloacetate-decarboxylating)(NADP+) [EC:1.1.1.40] | (RefSeq) me1; NADP-dependent malic enzyme	Pyruvate metabolism (ko00620);; Carbon metabolism (ko01200);; PPAR signaling pathway (ko03320)	[C]	Energy production and conversion	Malic enzyme, NAD binding domain	NADP-dependent malic enzyme OS=Anas platyrhynchos OX=8839 GN=ME1 PE=1 SV=1	C	Energy production and conversion	NADP-dependent malic enzyme [Epinephelus lanceolatus]	biological process: metabolic process (GO:0008152);; biological process: single-organism process (GO:0044699);; molecular function: catalytic activity (GO:0003824);; molecular function: binding (GO:0005488)
gene-iyd	iyd	21.328913	1393	8.826923	596	10.279735	837	55.411835	4255	54.26968	4401	21.713911	1610	0.00791211481493188	1.40509293706289	up	[C]	Energy production and conversion	Cellular Component: integral component of membrane (GO:0016021);; Molecular Function: oxidoreductase activity (GO:0016491);;	K17231|1.5e-106|mdo:100032091|K17231 iodotyrosine deiodinase [EC:1.21.1.1] | (RefSeq) IYD; iodotyrosine deiodinase	Thyroid hormone synthesis (ko04918)	[C]	Energy production and conversion	Nitroreductase family	--	C	Energy production and conversion	iodotyrosine deiodinase 1 [Larimichthys crocea]	cellular component: membrane (GO:0016020);; cellular component: membrane part (GO:0044425);; molecular function: catalytic activity (GO:0003824)
gene-hoxd11a	hoxd11a	0.444035	53	0.557032	68	0.366365	54	0.0	0	0.0	0	0.0	0	7.77483244251295e-11	-3.1182620137193	down	--	--	Cellular Component: nucleus (GO:0005634);; Biological Process: regulation of transcription, DNA-templated (GO:0006355);; Molecular Function: sequence-specific DNA binding (GO:0043565);;	K09296|1.2e-176|lco:104924434|K09296 homeobox protein HoxC/D11 | (RefSeq) homeobox protein Hox-D11a	--	[K]	Transcription	Protein of unknown function (DUF3528)	Homeobox protein Hox-D11a OS=Danio rerio OX=7955 GN=hoxd11a PE=2 SV=2	K	Transcription	LOW QUALITY PROTEIN: homeobox protein Hox-D11a-like [Sphaeramia orbicularis]	cellular component: cell (GO:0005623);; cellular component: organelle (GO:0043226);; cellular component: cell part (GO:0044464);; biological process: biological regulation (GO:0065007);; molecular function: binding (GO:0005488)
gene-LOC119902341	LOC119902341	0.28652	22	0.060227	5	0.098248	9	0.524505	48	0.584556	56	2.557926	222	0.00786016810042633	1.61885176895332	up	--	--	Molecular Function: molecular_function (GO:0003674);; Molecular Function: enzyme inhibitor activity (GO:0004857);; Cellular Component: cellular_component (GO:0005575);; Cellular Component: extracellular region (GO:0005576);; Biological Process: nitrogen compound metabolic process (GO:0006807);; Biological Process: response to stress (GO:0006950);; Biological Process: blood coagulation (GO:0007596…	K04004|1.5e-23|nni:104010470|K04004 complement factor H | (RefSeq) CFH; complement factor H	--	--	--	Sushi repeat (SCR repeat)	--	T	Signal transduction mechanisms	complement factor H [Micropterus salmoides]	biological process: biological regulation (GO:0065007);; molecular function: molecular function regulator (GO:0098772);; cellular component: extracellular region (GO:0005576);; biological process: metabolic process (GO:0008152);; biological process: response to stimulus (GO:0050896);; biological process: multicellular organismal process (GO:0032501);; biological process: single-organism process (…
gene-LOC119894934	LOC119894934	1.264921	136	1.5987	178	16.699398	2233	0.257397	33	0.275531	37	0.441441	54	0.000343121503229459	-1.99573928672003	down	--	--	--	K23284|8.2e-45|ncc:104951224|K23284 C1q-related factor | (RefSeq) complement C1q-like protein 4	--	--	--	C1q domain	--	S	Function unknown	uncharacterized protein LOC115594009 isoform X1 [Sparus aurata]	--
gene-LOC119913449	LOC119913449	1.012353	187	1.042215	199	1.650919	379	0.44199	96	0.308085	71	0.465532	98	0.00193741731620599	-1.26848011365267	down	--	--	Biological Process: protein deubiquitination (GO:0016579);; Molecular Function: thiol-dependent ubiquitinyl hydrolase activity (GO:0036459);;	--	--	[O]	Posttranslational modification, protein turnover, chaperones	Ubiquitin carboxyl-terminal hydrolase	--	O	Posttranslational modification, protein turnover, chaperones	LOW QUALITY PROTEIN: inactive ubiquitin carboxyl-terminal hydrolase 54-like [Morone saxatilis]	biological process: metabolic process (GO:0008152);; biological process: cellular process (GO:0009987);; molecular function: catalytic activity (GO:0003824)
gene-LOC119906841	LOC119906841	5.629439	336	6.154996	380	4.972618	370	28.325788	1988	19.785286	1467	21.745001	1474	3.12998323437223e-15	2.0194863868297	up	--	--	Molecular Function: carbohydrate binding (GO:0030246);;	K22244|1.4e-47|lcf:108881925|K22244 regenerating islet-derived protein 4 | (RefSeq) ladderlectin-like	--	--	--	Lectin C-type domain	Type-2 ice-structuring protein OS=Osmerus mordax OX=8014 PE=1 SV=1	--	--	galactose-specific lectin nattectin-like [Epinephelus lanceolatus]	molecular function: binding (GO:0005488)
gene-LOC119912538	LOC119912538	34.002293	2218	38.97789	2628	23.640728	1923	11.158707	857	8.996431	729	14.819921	1098	0.000276410417090216	-1.21229359375497	down	--	--	--	K06712|2.2e-92|sdu:111236662|K06712 butyrophilin | (RefSeq) butyrophilin subfamily 3 member A2-like isoform X1	--	--	--	Immunoglobulin domain	--	U	Intracellular trafficking, secretion, and vesicular transport	butyrophilin subfamily 2 member A1-like [Sparus aurata]	--
gene-LOC119892002	LOC119892002	1.721053	139	1.736153	145	1.475047	139	0.427999	41	0.588129	58	0.440366	42	0.00207008609015633	-1.31790450950388	down	--	--	--	K20910|4.9e-19|sfm:108941855|K20910 thioredoxin-interacting protein | (RefSeq) thioredoxin-interacting protein-like	NOD-like receptor signaling pathway (ko04621)	[R]	General function prediction only	Arrestin (or S-antigen), N-terminal domain	--	S	Function unknown	arrestin domain-containing protein 3-like [Seriola dumerili]	--
gene-LOC119905954	LOC119905954	6.805139	190	1.308063	38	11.803383	410	0.611222	21	0.985179	35	0.612065	20	0.00371376595794555	-1.69715147579594	down	--	--	Biological Process: cell fate specification (GO:0001708);; Biological Process: multicellular organism development (GO:0007275);; Biological Process: biological_process (GO:0008150);; Biological Process: cell proliferation (GO:0008283);; Biological Process: cellular process (GO:0009987);; Biological Process: cell differentiation (GO:0030154);; Biological Process: pancreas development (GO:0031016);…	K15411|6.7e-12|bacu:103019694|K15411 paired immunoglobulin-like type 2 receptor alpha | (RefSeq) PILRA; paired immunoglobin like type 2 receptor alpha	Herpes simplex virus 1 infection (ko05168)	--	--	Differentiation and proliferation regulator	Pancreatic progenitor cell differentiation and proliferation factor A OS=Danio rerio OX=7955 GN=ppdpfa PE=2 SV=1	S	Function unknown	pancreatic progenitor cell differentiation and proliferation factor A-like [Larimichthys crocea]	biological process: cellular process (GO:0009987);; biological process: developmental process (GO:0032502);; biological process: single-organism process (GO:0044699);; biological process: multicellular organismal process (GO:0032501)
gene-LOC119910237	LOC119910237	2.645491	182	2.624946	186	2.828697	242	1.123503	91	0.644558	55	1.207625	94	0.00350526269905054	-1.15806744865424	down	--	--	--	K17287|6.8e-226|lcf:108886673|K17287 tandem C2 domains nuclear protein | (RefSeq) tc2n; LOW QUALITY PROTEIN: tandem C2 domains nuclear protein	--	[TU]	Signal transduction mechanisms;; Intracellular trafficking, secretion, and vesicular transport	C2 domain	--	--	--	tandem C2 domains nuclear protein [Morone saxatilis]	--
gene-LOC119882213	LOC119882213	26.198093	1272	19.145815	960	45.249452999999995	2735	122.286641	6972	80.251886	4833	55.806539	3072	0.00671548231894652	1.32467805174284	up	--	--	Molecular Function: carbohydrate binding (GO:0030246);;	K13047|5.0e-36|sko:100366648|K13047 tolloid-like protein 2 [EC:3.4.24.-] | (RefSeq) zinc metalloproteinase nas-14-like	--	--	--	F5/8 type C domain	Fucolectin-6 OS=Anguilla japonica OX=7937 PE=2 SV=1	S	Function unknown	f-type lectin 3 [Oplegnathus fasciatus]	molecular function: binding (GO:0005488)
gene-ddx5	ddx5	171.68976899999998	11359	211.287035	14281	141.508968	11621	64.710623	5009	50.169843	4128	101.93091	7679	0.00580773486704598	-1.03369359715114	down	[L]	Replication, recombination and repair	Biological Process: negative regulation of transcription from RNA polymerase II promoter (GO:0000122);; Biological Process: RNA splicing, via transesterification reactions (GO:0000375);; Biological Process: RNA splicing, via transesterification reactions with bulged adenosine as nucleophile (GO:0000377);; Biological Process: alternative mRNA splicing, via spliceosome (GO:0000380);; Biological Pro…	K12823|8.9e-312|lcf:108898647|K12823 ATP-dependent RNA helicase DDX5/DBP2 [EC:3.6.4.13] | (RefSeq) probable ATP-dependent RNA helicase DDX5 isoform X1	Spliceosome (ko03040)	[A]	RNA processing and modification	DEAD/DEAH box helicase	ATP-dependent RNA helicase DDX42 OS=Gallus gallus OX=9031 GN=DDX42 PE=2 SV=1	A	RNA processing and modification	putative ATP-dependent RNA helicase DDX5 [Channa argus]	biological process: biological regulation (GO:0065007);; biological process: metabolic process (GO:0008152);; biological process: cellular process (GO:0009987);; biological process: multicellular organismal process (GO:0032501);; biological process: developmental process (GO:0032502);; biological process: single-organism process (GO:0044699);; biological process: immune system process (GO:0002376…
gene-LOC119893528	LOC119893528	39.029369	3470	25.135229	2310	48.290176	5352	7.521631	787	9.332704	1031	18.107115	1828	0.00298189530821095	-1.31127611691214	down	--	--	Cellular Component: integral component of membrane (GO:0016021);;	--	--	[V]	Defense mechanisms	Membrane-associating domain	MARVEL domain-containing protein 1 OS=Xenopus laevis OX=8355 GN=marveld1 PE=2 SV=1	V	Defense mechanisms	PREDICTED: plasmolipin [Lates calcarifer]	cellular component: membrane (GO:0016020);; cellular component: membrane part (GO:0044425)
gene-LOC119893900	LOC119893900	3.082223	207	3.041855	212	2.381712	200	0.60673	48	0.478052	40	0.646125	50	8.39558422382244e-09	-1.88943015301648	down	[E]	Amino acid transport and metabolism	Molecular Function: tryptophan 5-monooxygenase activity (GO:0004510);; Molecular Function: iron ion binding (GO:0005506);; Biological Process: aromatic amino acid family metabolic process (GO:0009072);; Biological Process: serotonin biosynthetic process (GO:0042427);;	K00502|1.1e-273|sdu:111229584|K00502 tryptophan 5-monooxygenase [EC:1.14.16.4] | (RefSeq) tph1; tryptophan 5-hydroxylase 1 isoform X1	Tryptophan metabolism (ko00380);; Folate biosynthesis (ko00790)	[E]	Amino acid transport and metabolism	Biopterin-dependent aromatic amino acid hydroxylase	Tryptophan 5-hydroxylase OS=Xenopus laevis OX=8355 GN=tph PE=2 SV=1	E	Amino acid transport and metabolism	tryptophan 5-hydroxylase 1a [Morone saxatilis]	biological process: metabolic process (GO:0008152);; biological process: single-organism process (GO:0044699);; molecular function: catalytic activity (GO:0003824);; molecular function: binding (GO:0005488);; biological process: cellular process (GO:0009987)
gene-plvapb	plvapb	12.052139	980	15.197257	1252	11.654404999999999	1218	4.565265	453	5.106155	528	4.193344	396	9.48302834191905e-05	-1.18923356157542	down	--	--	Biological Process: Notch signaling pathway (GO:0007219);; Cellular Component: integral component of membrane (GO:0016021);;	K17309|3.4e-167|sdu:111226335|K17309 plasmalemma vesicle-associated protein | (RefSeq) plasmalemma vesicle-associated protein-like isoform X1	--	--	--	PV-1 protein (PLVAP)	--	S	Function unknown	plasmalemma vesicle-associated protein-like isoform X2 [Seriola dumerili]	biological process: cellular process (GO:0009987);; biological process: signaling (GO:0023052);; biological process: single-organism process (GO:0044699);; biological process: response to stimulus (GO:0050896);; biological process: biological regulation (GO:0065007);; cellular component: membrane (GO:0016020);; cellular component: membrane part (GO:0044425)
Micropterus_salmoides_newGene_5171	--	76.160544	2328	86.56354999999999	2742	52.260394	1936	25.593201999999998	893	20.616734	750	21.27898	720	1.01375856994705e-05	-1.4097092197698	down	--	--	--	--	--	--	--	--	--	--	--	--	--
gene-LOC119899642	LOC119899642	347.637668	19721	397.119774	23282	194.542495	13434	15.144105	1016	16.650299999999998	1175	35.311952	2271	2.34632957986088e-17	-3.0300779111429	down	--	--	Biological Process: lymph vessel development (GO:0001945);; Molecular Function: DNA binding (GO:0003677);; Molecular Function: transcription factor activity, sequence-specific DNA binding (GO:0003700);; Cellular Component: nucleus (GO:0005634);; Biological Process: regulation of transcription from RNA polymerase II promoter (GO:0006357);; Biological Process: regulation of cell cycle (GO:0051726);…	K09028|5.1e-172|lcf:108875663|K09028 transcription factor jun-B | (RefSeq) transcription factor jun-B-like isoform X1	--	[K]	Transcription	Jun-like transcription factor	Transcription factor jun-B OS=Cyprinus carpio OX=7962 GN=junb PE=2 SV=1	K	Transcription	PREDICTED: transcription factor jun-B-like isoform X1 [Lates calcarifer]	biological process: developmental process (GO:0032502);; biological process: single-organism process (GO:0044699);; molecular function: binding (GO:0005488);; biological process: biological regulation (GO:0065007);; molecular function: nucleic acid binding transcription factor activity (GO:0001071);; cellular component: cell (GO:0005623);; cellular component: organelle (GO:0043226);; cellular com…
gene-hoxc13a	hoxc13a	2.11326	120	1.304168	77	8.539442	602	0.545867	37	0.464985	33	0.507168	33	0.00277171216379982	-1.71196930476423	down	--	--	Molecular Function: RNA polymerase II transcription factor activity, sequence-specific DNA binding (GO:0000981);; Molecular Function: transcription factor activity, RNA polymerase II core promoter proximal region sequence-specific binding (GO:0000982);; Molecular Function: transcriptional activator activity, RNA polymerase II core promoter proximal region sequence-specific binding (GO:0001077);; …	K09298|4.4e-178|sdu:111219155|K09298 homeobox protein HoxA/C/D13 | (RefSeq) hoxc13; homeobox protein Hox-C13	--	[K]	Transcription	Hox protein A13 N terminal	Homeobox protein Hox-C13a OS=Takifugu rubripes OX=31033 GN=hoxc13a PE=3 SV=1	K	Transcription	homeobox protein Hox-C13 [Sphaeramia orbicularis]	biological process: biological regulation (GO:0065007);; molecular function: nucleic acid binding transcription factor activity (GO:0001071);; biological process: metabolic process (GO:0008152);; biological process: cellular process (GO:0009987);; biological process: multicellular organismal process (GO:0032501);; biological process: developmental process (GO:0032502);; biological process: single…
gene-LOC119886395	LOC119886395	39.529881	2155	23.072868	1300	16.11709	1095	4.487512	288	3.252166	221	4.033165	250	1.45835104298133e-09	-2.18427835276964	down	--	--	Biological Process: negative regulation of transcription from RNA polymerase II promoter (GO:0000122);; Biological Process: cell activation (GO:0001775);; Biological Process: adaptive immune response (GO:0002250);; Biological Process: immune effector process (GO:0002252);; Biological Process: activation of immune response (GO:0002253);; Biological Process: immune system process (GO:0002376);; Bio…	K08890|1.6e-35|cmy:102931113|K08890 B lymphoid tyrosine kinase [EC:2.7.10.2] | (RefSeq) BLK; BLK proto-oncogene, Src family tyrosine kinase	--	--	--	SH2 domain	Proto-oncogene tyrosine-protein kinase LCK OS=Gallus gallus OX=9031 GN=LCK PE=2 SV=2	T	Signal transduction mechanisms	hypothetical protein PFLUV_G00040000 [Perca fluviatilis]	biological process: biological regulation (GO:0065007);; biological process: cellular process (GO:0009987);; biological process: single-organism process (GO:0044699);; biological process: immune system process (GO:0002376);; biological process: response to stimulus (GO:0050896);; biological process: signaling (GO:0023052);; molecular function: catalytic activity (GO:0003824);; biological process:…
gene-hoxc11a	hoxc11a	1.469232	78	1.059455	58	3.660123	241	0.0	0	0.030595	3	0.0	0	4.38792111640193e-09	-2.88501236589321	down	--	--	Cellular Component: nucleus (GO:0005634);; Biological Process: regulation of transcription, DNA-templated (GO:0006355);; Molecular Function: sequence-specific DNA binding (GO:0043565);;	K09296|4.7e-151|lcf:108876407|K09296 homeobox protein HoxC/D11 | (RefSeq) hoxc11; homeobox protein Hox-C11	--	[K]	Transcription	Protein of unknown function (DUF3528)	Homeobox protein Hox-C11a OS=Takifugu rubripes OX=31033 GN=hoxc11a PE=3 SV=1	K	Transcription	homeobox protein Hox-C11 [Labrus bergylta]	cellular component: cell (GO:0005623);; cellular component: organelle (GO:0043226);; cellular component: cell part (GO:0044464);; biological process: biological regulation (GO:0065007);; molecular function: binding (GO:0005488)
gene-fgf10b	fgf10b	9.367943	633	13.702353	956	8.752235	737	0.123225	10	1.152072	97	1.647056	127	0.000197647358515793	-1.99827509365584	down	--	--	Biological Process: reproduction (GO:0000003);; Biological Process: regulation of cyclin-dependent protein serine/threonine kinase activity (GO:0000079);; Biological Process: establishment of mitotic spindle orientation (GO:0000132);; Biological Process: MAPK cascade (GO:0000165);; Biological Process: activation of MAPK activity (GO:0000187);; Biological Process: microtubule cytoskeleton organiza…	K04358|1.0e-116|lcf:108881336|K04358 fibroblast growth factor | (RefSeq) fgf10; fibroblast growth factor 10	MAPK signaling pathway (ko04010);; Regulation of actin cytoskeleton (ko04810)	[T]	Signal transduction mechanisms	Fibroblast growth factor	Fibroblast growth factor 3 OS=Danio rerio OX=7955 GN=fgf3 PE=1 SV=1	T	Signal transduction mechanisms	fibroblast growth factor 10 [Cottoperca gobio]	biological process: reproduction (GO:0000003);; biological process: biological regulation (GO:0065007);; biological process: cellular process (GO:0009987);; biological process: single-organism process (GO:0044699);; biological process: localization (GO:0051179);; biological process: cellular component organization or biogenesis (GO:0071840);; biological process: metabolic process (GO:0008152);; b…
gene-LOC119912283	LOC119912283	2.623227	185	2.712976	197	0.399527	35	0.086839	8	0.0	0	0.049872	4	9.21142918276884e-05	-2.12826569883647	down	--	--	Molecular Function: nucleic acid binding (GO:0003676);;	K12498|6.9e-172|lcf:108892251|K12498 early growth response protein 4 | (RefSeq) early growth response protein 4-like	--	[R]	General function prediction only	Zinc-finger double domain	Early growth response protein 2b OS=Danio rerio OX=7955 GN=egr2b PE=2 SV=1	S	Function unknown	early growth response protein 4-like [Epinephelus lanceolatus]	molecular function: binding (GO:0005488)
gene-LOC119899567	LOC119899567	0.981054	39	1.280256	52	1.139803	55	5.819553	264	4.400855	212	2.562475	113	0.000483913851381429	1.60730902883189	up	--	--	Molecular Function: hormone activity (GO:0005179);; Cellular Component: extracellular region (GO:0005576);;	K05226|1.1e-35|sdu:111229415|K05226 cholecystokinin | (RefSeq) gastrin/cholecystokinin-like peptide	Neuroactive ligand-receptor interaction (ko04080)	--	--	Gastrin/cholecystokinin family	--	S	Function unknown	gastrin/cholecystokinin-like peptide [Seriola dumerili]	molecular function: binding (GO:0005488);; cellular component: extracellular region (GO:0005576)
gene-LOC119910538	LOC119910538	7.667745	613	4.3038620000000005	352	2.607497	250	1.208286	53	0.33976	16	0.319493	14	1.19308106681347e-07	-2.52377361786745	down	--	--	Molecular Function: protein binding (GO:0005515);;	K22614|1.7e-73|sdu:111233134|K22614 NLR family CARD domain-containing protein 3 | (RefSeq) NLR family CARD domain-containing protein 3-like	--	[O]	Posttranslational modification, protein turnover, chaperones	PAAD/DAPIN/Pyrin domain	Neoverrucotoxin subunit beta OS=Synanceia verrucosa OX=51996 PE=1 SV=1	S	Function unknown	neoverrucotoxin subunit alpha-like [Anarrhichthys ocellatus]	molecular function: binding (GO:0005488)
gene-LOC119913228	LOC119913228	2.222589	141	1.257248	82	1.95431	154	9.686661	718	5.309837	416	3.763268	270	0.00153860014758522	1.51258119617012	up	--	--	Molecular Function: zinc ion binding (GO:0008270);;	K12006|2.4e-211|lcf:108880941|K12006 tripartite motif-containing protein 16 | (RefSeq) tripartite motif-containing protein 16-like	--	[O]	Posttranslational modification, protein turnover, chaperones	zinc finger of C3HC4-type, RING	Stonustoxin subunit beta OS=Synanceia horrida OX=13279 PE=1 SV=3	O	Posttranslational modification, protein turnover, chaperones	tripartite motif-containing protein 16-like [Epinephelus lanceolatus]	molecular function: binding (GO:0005488)
gene-pnp5a	pnp5a	328.275177	14606	327.738464	15073	167.311234	9280	5.578069	292	25.925756	1433	22.364565	1130	2.19105137770421e-09	-2.6619928922477	down	[F]	Nucleotide transport and metabolism	Molecular Function: purine-nucleoside phosphorylase activity (GO:0004731);; Biological Process: nucleoside metabolic process (GO:0009116);;	K03783|1.2e-159|sdu:111235647|K03783 purine-nucleoside phosphorylase [EC:2.4.2.1] | (RefSeq) pnp; purine nucleoside phosphorylase	Purine metabolism (ko00230);; Pyrimidine metabolism (ko00240);; Nicotinate and nicotinamide metabolism (ko00760)	[F]	Nucleotide transport and metabolism	Phosphorylase superfamily	--	F	Nucleotide transport and metabolism	purine nucleoside phosphorylase-like [Hippoglossus hippoglossus]	molecular function: catalytic activity (GO:0003824);; biological process: metabolic process (GO:0008152);; biological process: cellular process (GO:0009987);; biological process: single-organism process (GO:0044699)
gene-LOC119912387	LOC119912387	0.979804	75	0.467347	37	5.43556	519	0.0	0	0.070904	7	0.022861	2	0.000673191968537673	-1.91075031616094	down	--	--	Cellular Component: integral component of membrane (GO:0016021);;	K12385|8.2e-65|lak:106153278|K12385 Niemann-Pick C1 protein | (RefSeq) protein patched homolog 1	Lysosome (ko04142)	[R]	General function prediction only	Patched family	Patched domain-containing protein 1 OS=Danio rerio OX=7955 GN=ptchd1 PE=3 SV=1	S	Function unknown	patched domain-containing protein 3-like [Epinephelus lanceolatus]	cellular component: membrane (GO:0016020);; cellular component: membrane part (GO:0044425)
gene-ssh2a	ssh2a	39.641994	5959	58.202824	9044	26.765531	5011	7.569596	1302	11.225726	2094	12.466831	2121	4.55500777975958e-05	-1.58134687346984	down	--	--	Biological Process: mitotic cell cycle (GO:0000278);; Biological Process: cell morphogenesis (GO:0000902);; Biological Process: cell morphogenesis involved in differentiation (GO:0000904);; Biological Process: eye development (GO:0001654);; Molecular Function: molecular_function (GO:0003674);; Molecular Function: actin binding (GO:0003779);; Molecular Function: catalytic activity (GO:0003824);; M…	K05766|0.0e+00|sdu:111233426|K05766 protein phosphatase slingshot [EC:3.1.3.16 3.1.3.48] | (RefSeq) ssh2; protein phosphatase Slingshot homolog 2	Regulation of actin cytoskeleton (ko04810)	[V]	Defense mechanisms	Dual specificity phosphatase, catalytic domain	Protein phosphatase Slingshot homolog OS=Xenopus laevis OX=8355 GN=ssh PE=1 SV=2	V	Defense mechanisms	protein phosphatase Slingshot homolog 2 isoform X1 [Sparus aurata]	biological process: cellular process (GO:0009987);; biological process: single-organism process (GO:0044699);; biological process: developmental process (GO:0032502);; biological process: cellular component organization or biogenesis (GO:0071840);; biological process: multicellular organismal process (GO:0032501);; molecular function: binding (GO:0005488);; molecular function: catalytic activity …
gene-gldc	gldc	22.578732	2758	20.455816	2583	26.295935	4004	71.105705	10215	73.72168	11183	31.405617	4356	0.00775392988565739	1.24716693909875	up	[E]	Amino acid transport and metabolism	Molecular Function: glycine dehydrogenase (decarboxylating) activity (GO:0004375);; Cellular Component: mitochondrion (GO:0005739);; Biological Process: glycine catabolic process (GO:0006546);; Molecular Function: lyase activity (GO:0016829);;	K00281|0.0e+00|lco:104918984|K00281 glycine dehydrogenase [EC:1.4.4.2] | (RefSeq) gldc; glycine dehydrogenase (decarboxylating), mitochondrial	Glycine, serine and threonine metabolism (ko00260);; Glyoxylate and dicarboxylate metabolism (ko00630);; Carbon metabolism (ko01200)	[E]	Amino acid transport and metabolism	Glycine cleavage system P-protein	Glycine dehydrogenase (decarboxylating), mitochondrial OS=Gallus gallus OX=9031 GN=GLDC PE=1 SV=2	E	Amino acid transport and metabolism	glycine dehydrogenase (decarboxylating), mitochondrial [Epinephelus lanceolatus]	biological process: metabolic process (GO:0008152);; biological process: single-organism process (GO:0044699);; molecular function: catalytic activity (GO:0003824);; cellular component: cell (GO:0005623);; cellular component: organelle (GO:0043226);; cellular component: cell part (GO:0044464);; biological process: cellular process (GO:0009987)
gene-LOC119909773	LOC119909773	2.64007	313	1.647195	202	2.070176	306	0.367413	52	0.503028	75	0.632128	86	1.06357010136632e-05	-1.64458438807397	down	[T]	Signal transduction mechanisms	Biological Process: inactivation of MAPK activity (GO:0000188);; Biological Process: formation of primary germ layer (GO:0001704);; Biological Process: endoderm formation (GO:0001706);; Biological Process: regulation of protein phosphorylation (GO:0001932);; Biological Process: negative regulation of protein phosphorylation (GO:0001933);; Molecular Function: molecular_function (GO:0003674);; Mole…	K04459|5.4e-191|lcf:108886042|K04459 dual specificity MAP kinase phosphatase [EC:3.1.3.16 3.1.3.48] | (RefSeq) dusp4; dual specificity protein phosphatase 4	MAPK signaling pathway (ko04010)	[V]	Defense mechanisms	Dual specificity phosphatase, catalytic domain	Dual specificity protein phosphatase 4 OS=Gallus gallus OX=9031 GN=DUSP4 PE=2 SV=1	V	Defense mechanisms	Dual specificity protein phosphatase 4 [Channa argus]	biological process: biological regulation (GO:0065007);; biological process: developmental process (GO:0032502);; biological process: single-organism process (GO:0044699);; biological process: multicellular organismal process (GO:0032501);; molecular function: catalytic activity (GO:0003824);; biological process: metabolic process (GO:0008152);; biological process: cellular process (GO:0009987);;…
gene-LOC119888589	LOC119888589	1.039976	200	1.131927	225	1.484424	355	0.514627	117	0.463389	111	0.50616	111	0.00603877391916136	-1.03298519621293	down	--	--	Biological Process: reproduction (GO:0000003);; Molecular Function: molecular_function (GO:0003674);; Molecular Function: catalytic activity (GO:0003824);; Molecular Function: endopeptidase activity (GO:0004175);; Molecular Function: metalloendopeptidase activity (GO:0004222);; Cellular Component: cellular_component (GO:0005575);; Cellular Component: extracellular region (GO:0005576);; Biological…	K08618|0.0e+00|lco:104927075|K08618 a disintegrin and metalloproteinase with thrombospondin motifs 2 [EC:3.4.24.14] | (RefSeq) A disintegrin and metalloproteinase with thrombospondin motifs 2 isoform X1	--	[O]	Posttranslational modification, protein turnover, chaperones	Reprolysin family propeptide	Zinc metalloproteinase/disintegrin OS=Gloydius brevicaudus OX=259325 PE=1 SV=1	O	Posttranslational modification, protein turnover, chaperones	A disintegrin and metalloproteinase with thrombospondin motifs 2-like [Morone saxatilis]	biological process: reproduction (GO:0000003);; molecular function: catalytic activity (GO:0003824);; biological process: metabolic process (GO:0008152);; cellular component: extracellular region (GO:0005576);; biological process: multicellular organismal process (GO:0032501);; biological process: developmental process (GO:0032502);; biological process: single-organism process (GO:0044699);; biol…
gene-bhlhe41	bhlhe41	99.047512	10860	74.971558	8496	75.523354	10322	13.143180000000001	1696	25.623862000000003	3489	24.49335	3050	8.80541123188468e-06	-1.58845050925239	down	--	--	Molecular Function: DNA binding (GO:0003677);; Cellular Component: nucleus (GO:0005634);; Biological Process: regulation of transcription, DNA-templated (GO:0006355);; Molecular Function: protein dimerization activity (GO:0046983);;	K03730|9.0e-222|lco:104924373|K03730 class B basic helix-loop-helix protein 3 | (RefSeq) bhlhe41; class E basic helix-loop-helix protein 41 isoform X2	--	[K]	Transcription	Helix-loop-helix DNA-binding domain	Transcription factor HES-1 OS=Xenopus tropicalis OX=8364 GN=hes1 PE=2 SV=1	K	Transcription	hypothetical protein E3U43_004558 [Larimichthys crocea]	molecular function: binding (GO:0005488);; cellular component: cell (GO:0005623);; cellular component: organelle (GO:0043226);; cellular component: cell part (GO:0044464);; biological process: biological regulation (GO:0065007)
Micropterus_salmoides_newGene_2037	--	1.448016	51	1.486459	54	16.338957	714	0.277967	12	0.130753	6	0.240339	10	0.000367801432059418	-1.98877393002995	down	--	--	Cellular Component: microfibril (GO:0001527);; Cellular Component: cellular_component (GO:0005575);; Cellular Component: extracellular region (GO:0005576);; Biological Process: biological_process (GO:0008150);; Biological Process: response to radiation (GO:0009314);; Biological Process: response to UV (GO:0009411);; Biological Process: response to light stimulus (GO:0009416);; Biological Process:…	K10104|1.9e-40|lak:106157226|K10104 ficolin | (RefSeq) techylectin-5B-like	--	[R]	General function prediction only	Fibrinogen beta and gamma chains, C-terminal globular domain	Fibrinogen C domain-containing protein 1-A OS=Xenopus laevis OX=8355 GN=fibcd1-a PE=2 SV=1	S	Function unknown	hypothetical protein PFLUV_G00238860 [Perca fluviatilis]	cellular component: extracellular region (GO:0005576);; cellular component: extracellular region part (GO:0044421);; cellular component: supramolecular complex (GO:0099080);; biological process: response to stimulus (GO:0050896);; biological process: cellular process (GO:0009987);; biological process: biological regulation (GO:0065007);; biological process: cellular component organization or biog…
gene-LOC119900496	LOC119900496	4.759665	287	6.092685	379	2.482747	187	1.671828	119	0.59766	45	0.807266	56	0.00623879137322523	-1.45644211801271	down	--	--	Molecular Function: DNA binding (GO:0003677);; Molecular Function: transcription factor activity, sequence-specific DNA binding (GO:0003700);; Cellular Component: nucleus (GO:0005634);; Biological Process: regulation of transcription from RNA polymerase II promoter (GO:0006357);;	K04449|2.1e-128|lco:104930914|K04449 transcription factor jun-D | (RefSeq) jund; transcription factor jun-D	MAPK signaling pathway (ko04010)	[K]	Transcription	Jun-like transcription factor	Transcription factor AP-1 OS=Gallus gallus OX=9031 GN=JUN PE=1 SV=2	K	Transcription	transcription factor jun-D [Mastacembelus armatus]	molecular function: binding (GO:0005488);; biological process: biological regulation (GO:0065007);; molecular function: nucleic acid binding transcription factor activity (GO:0001071);; cellular component: cell (GO:0005623);; cellular component: organelle (GO:0043226);; cellular component: cell part (GO:0044464)
gene-si	si	80.830078	13549	33.842506	5864	42.20327	8819	435.261353	85807	286.037964	59546	91.394516	17394	0.000690695661511345	1.76609697440991	up	[G]	Carbohydrate transport and metabolism	Molecular Function: hydrolase activity, hydrolyzing O-glycosyl compounds (GO:0004553);; Biological Process: carbohydrate metabolic process (GO:0005975);; Cellular Component: integral component of membrane (GO:0016021);; Molecular Function: carbohydrate binding (GO:0030246);;	K12047|0.0e+00|sdu:111238462|K12047 maltase-glucoamylase [EC:3.2.1.20 3.2.1.3] | (RefSeq) maltase-glucoamylase, intestinal-like	Galactose metabolism (ko00052);; Starch and sucrose metabolism (ko00500)	[G]	Carbohydrate transport and metabolism	Glycosyl hydrolases family 31	--	G	Carbohydrate transport and metabolism	sucrase-isomaltase, intestinal [Morone saxatilis]	molecular function: catalytic activity (GO:0003824);; biological process: metabolic process (GO:0008152);; cellular component: membrane (GO:0016020);; cellular component: membrane part (GO:0044425);; molecular function: binding (GO:0005488)
gene-rgcc	rgcc	4.854855	441	4.38946	412	5.241035	593	1.686297	180	1.888391	213	2.391951	247	0.000532435599935892	-1.05720656244827	down	--	--	Biological Process: regulation of cell cycle (GO:0051726);;	K05012|1.3e-06|gfr:102042322|K05012 chloride channel 3/4/5 | (RefSeq) H(+)/Cl(-) exchange transporter 5	--	--	--	Response gene to complement 32 protein family	--	S	Function unknown	regulator of cell cycle RGCC isoform X2 [Cynoglossus semilaevis]	biological process: biological regulation (GO:0065007)
gene-LOC119900143	LOC119900143	9.163825	131	22.332788	330	10.366321	185	0.283712	5	0.118685	3	0.261583	5	3.05809887753648e-18	-3.69633440725475	down	--	--	--	K17270|3.2e-55|lcf:108886830|K17270 myelin-oligodendrocyte glycoprotein | (RefSeq) myelin-oligodendrocyte glycoprotein-like	--	--	--	Immunoglobulin V-set domain	--	--	--	myelin-oligodendrocyte glycoprotein-like [Morone saxatilis]	--
gene-LOC119905208	LOC119905208	8.193327	505	6.72065	441	7.208043	573	13.302278	997	17.494519	1385	15.051816	1090	0.000311982029667655	1.11745039754826	up	[E]	Amino acid transport and metabolism	Cellular Component: Golgi membrane (GO:0000139);; Molecular Function: molecular_function (GO:0003674);; Molecular Function: catalytic activity (GO:0003824);; Molecular Function: binding (GO:0005488);; Molecular Function: protein binding (GO:0005515);; Molecular Function: folic acid binding (GO:0005542);; Cellular Component: cellular_component (GO:0005575);; Cellular Component: intracellular (GO:0…	K13990|2.5e-258|lcf:108874335|K13990 glutamate formiminotransferase / formiminotetrahydrofolate cyclodeaminase [EC:2.1.2.5 4.3.1.4] | (RefSeq) formimidoyltransferase-cyclodeaminase-like	Histidine metabolism (ko00340);; One carbon pool by folate (ko00670)	--	--	Formiminotransferase domain	Formimidoyltransferase-cyclodeaminase OS=Gallus gallus OX=9031 GN=FTCD PE=2 SV=1	E	Amino acid transport and metabolism	formimidoyltransferase-cyclodeaminase [Larimichthys crocea]	cellular component: cell (GO:0005623);; cellular component: membrane (GO:0016020);; cellular component: organelle (GO:0043226);; cellular component: organelle part (GO:0044422);; cellular component: cell part (GO:0044464);; molecular function: catalytic activity (GO:0003824);; molecular function: binding (GO:0005488);; cellular component: membrane part (GO:0044425);; biological process: metabolic…
gene-LOC119912873	LOC119912873	3.78323	668	4.214154	769	13.21344	2906	1.675252	348	0.747907	164	1.875871	376	0.00287444347933755	-1.57759439755324	down	[L]	Replication, recombination and repair	Molecular Function: protein binding (GO:0005515);;	K12797|1.5e-49|mdo:100018349|K12797 caspase recruitment domain-containing protein 6 | (RefSeq) CARD6; caspase recruitment domain family member 6	NOD-like receptor signaling pathway (ko04621)	--	--	Fibronectin type III domain	--	S	Function unknown	interferon-induced very large GTPase 1-like isoform X1 [Sander lucioperca]	molecular function: binding (GO:0005488)
gene-LOC119897090	LOC119897090	1.96057	46	4.588338	110	46.048336	1331	1.118672	31	1.13764	33	0.721013	19	0.00508937602020173	-1.68260670554962	down	--	--	--	K03131|3.0e-16|lsr:110482101|K03131 transcription initiation factor TFIID subunit 6 | (RefSeq) transcription initiation factor TFIID subunit 6	Basal transcription factors (ko03022)	--	--	Vitelline membrane outer layer protein I (VOMI)	--	S	Function unknown	vitelline membrane outer layer protein 1 homolog [Epinephelus lanceolatus]	--
gene-LOC119896175	LOC119896175	0.246935	117	1.414981	693	0.284415	168	0.062367	35	0.097591	58	0.079467	43	0.00260589062026538	-1.72468287737883	down	--	--	--	K20478|9.2e-241|lcf:108879499|K20478 golgin subfamily B member 1 | (RefSeq) LOW QUALITY PROTEIN: centrosomal protein of 290 kDa-like	--	--	--	--	--	--	--	PREDICTED: LOW QUALITY PROTEIN: centrosomal protein of 290 kDa-like [Lates calcarifer]	--
gene-LOC119901095	LOC119901095	3.751412	205	1.849984	105	21.998274	1493	0.640166	41	0.28487	20	0.698718	44	0.000218199489213874	-2.03587261501821	down	[O]	Posttranslational modification, protein turnover, chaperones	Molecular Function: serine-type endopeptidase activity (GO:0004252);;	K01345|4.0e-151|lco:104919063|K01345 pancreatic endopeptidase E [EC:3.4.21.70] | (RefSeq) chymotrypsin-like elastase family member 3B	--	[E]	Amino acid transport and metabolism	Trypsin	Elastase-1 OS=Salmo salar OX=8030 PE=1 SV=1	E	Amino acid transport and metabolism	chymotrypsin-like elastase family member 3B [Sander lucioperca]	biological process: metabolic process (GO:0008152);; molecular function: catalytic activity (GO:0003824)
gene-ddb2	ddb2	4.680359	248	7.074546	387	2.903313	193	1.166345	74	1.426813	95	1.857026	113	0.00882932489975483	-1.26797399694154	down	--	--	Molecular Function: damaged DNA binding (GO:0003684);; Cellular Component: nucleus (GO:0005634);; Biological Process: DNA repair (GO:0006281);; Cellular Component: Cul4-RING E3 ubiquitin ligase complex (GO:0080008);;	K10140|4.5e-241|sdu:111228602|K10140 DNA damage-binding protein 2 | (RefSeq) ddb2; DNA damage-binding protein 2 isoform X1	Nucleotide excision repair (ko03420);; p53 signaling pathway (ko04115);; Ubiquitin mediated proteolysis (ko04120)	[S]	Function unknown	WD domain, G-beta repeat	DNA damage-binding protein 2 OS=Danio rerio OX=7955 GN=ddb2 PE=1 SV=2	S	Function unknown	hypothetical protein EPR50_G00088220 [Perca flavescens]	molecular function: binding (GO:0005488);; cellular component: cell (GO:0005623);; cellular component: organelle (GO:0043226);; cellular component: cell part (GO:0044464);; biological process: metabolic process (GO:0008152);; biological process: cellular process (GO:0009987);; biological process: response to stimulus (GO:0050896);; cellular component: macromolecular complex (GO:0032991)
gene-ca4b	ca4b	9.908605	572	3.99326	239	16.141367	1162	0.0	0	0.029478	3	0.0	0	2.99448796873835e-26	-4.60307105482502	down	[P]	Inorganic ion transport and metabolism	Molecular Function: carbonate dehydratase activity (GO:0004089);; Cellular Component: plasma membrane (GO:0005886);; Molecular Function: zinc ion binding (GO:0008270);; Cellular Component: integral component of membrane (GO:0016021);; Cellular Component: anchored component of membrane (GO:0031225);;	K18246|8.2e-140|lcf:108875971|K18246 carbonic anhydrase 4 [EC:4.2.1.1] | (RefSeq) carbonic anhydrase 4-like	Nitrogen metabolism (ko00910)	[R]	General function prediction only	Eukaryotic-type carbonic anhydrase	--	P	Inorganic ion transport and metabolism	PREDICTED: carbonic anhydrase 4-like [Lates calcarifer]	molecular function: catalytic activity (GO:0003824);; cellular component: cell (GO:0005623);; cellular component: membrane (GO:0016020);; cellular component: cell part (GO:0044464);; molecular function: binding (GO:0005488);; cellular component: membrane part (GO:0044425)
