# Supplementary material for: Effect of Autolyzed Yarrowia lipolytica on the Growth Performance, Antioxidant Capacity, Intestinal Histology, Microbiota, and Transcriptome Profile of Juvenile Largemouth Bass (Micropterus salmoides)
Source: Int J Mol Sci. 2022 Sep 15;23(18):10780. doi: 10.3390/ijms231810780 (PMC9503160; doi:10.3390/ijms231810780)
Supplement: Supplementary file 1 [file ijms-23-10780-s001.zip › Table S8.xls]

#ID	gene_name	Con1_FPKM	Con1_count	Con2_FPKM	Con2_count	Con3_FPKM	Con3_count	Y75-1_FPKM	Y75-1_count	Y75-2_FPKM	Y75-2_count	Y75-3_FPKM	Y75-3_count	FDR	log2FC	regulated	COG_class	COG_class_annotation	GO_annotation	KEGG_annotation	KEGG_pathway_annotation	KOG_class	KOG_class_annotation	Pfam_annotation	Swiss_Prot_annotation	eggNOG_class	eggNOG_class_annotation	NR_annotation	GO_second_level_annotation
gene-LOC119887864	LOC119887864	4.554537	835	4.463264	823	4.627591000000001	1041	12.59922	2692	15.247682000000001	3132	13.234295	2914	6.34445242865934e-12	1.4871865123972	up	--	--	Biological Process: negative regulation of transcription from RNA polymerase II promoter (GO:0000122);; Molecular Function: RNA polymerase II transcription factor activity, sequence-specific DNA binding (GO:0000981);; Molecular Function: transcription factor activity, RNA polymerase II core promoter proximal region sequence-specific binding (GO:0000982);; Molecular Function: transcriptional repre…	K10486|3.1e-278|sdu:111229938|K10486 BTB/POZ domain-containing protein 14 | (RefSeq) nucleus accumbens-associated protein 1-like	--	[R]	General function prediction only	BTB/POZ domain	Zinc finger and BTB domain-containing protein 14 OS=Gallus gallus OX=9031 GN=ZBTB14 PE=2 SV=1	S	Function unknown	nucleus accumbens-associated protein 1-like isoform X1 [Cottoperca gobio]	biological process: biological regulation (GO:0065007);; molecular function: nucleic acid binding transcription factor activity (GO:0001071);; molecular function: binding (GO:0005488);; cellular component: cell (GO:0005623);; cellular component: cell part (GO:0044464);; cellular component: organelle (GO:0043226);; cellular component: organelle part (GO:0044422);; biological process: cellular proc…
gene-si:ch211-180a12.2	si:ch211-180a12.2	12.171007	1123	10.779265	1028	9.146139000000002	1052	31.063799000000003	3438	23.017959	2437	25.176181	2867	2.79764199420557e-05	1.19757048453943	up	--	--	--	K16349|4.7e-21|xtr:100498173|K16349 natural cytotoxicity triggering receptor 3 ligand 1 | (RefSeq) uncharacterized protein LOC100498173 isoform X1	--	--	--	Immunoglobulin C1-set domain	--	T	Signal transduction mechanisms	uncharacterized protein si:ch211-180a12.2 isoform X2 [Sander lucioperca]	--
gene-noxo1b	noxo1b	9.834653	683	7.317739	526	18.461281	1599	41.781605	3475	79.932884	6368	63.302559	5421	3.54370653707721e-06	1.74247919394904	up	--	--	Molecular Function: phosphatidylinositol binding (GO:0035091);;	K17934|1.9e-199|sdu:111220155|K17934 NADPH oxidase organizer 1 | (RefSeq) NADPH oxidase organizer 1-like	--	--	--	Variant SH3 domain	SH3 and PX domain-containing protein 2A OS=Danio rerio OX=7955 GN=sh3pxd2a PE=3 SV=2	T	Signal transduction mechanisms	NADPH oxidase organizer 1-like [Anarrhichthys ocellatus]	molecular function: binding (GO:0005488)
Micropterus_salmoides_newGene_2297	--	2.293186	249	3.627304	407	4.199229	560	0.6110180000000001	80	1.017521	127	1.175489	158	0.000347423474717213	-1.37440446539641	down	--	--	--	--	--	--	--	--	--	--	--	--	--
gene-LOC119912423	LOC119912423	93.454857	3240	93.159363	3338	120.486969	5207	296.309357	12299	192.557907	7657	224.203522	9583	0.00090865729260521	1.09090361078644	up	--	--	Biological Process: immune response (GO:0006955);; Cellular Component: integral component of membrane (GO:0016021);; Biological Process: antigen processing and presentation (GO:0019882);; Cellular Component: MHC class II protein complex (GO:0042613);;	K06752|4.2e-110|lcf:108882204|K06752 MHC class II antigen | (RefSeq) H-2 class II histocompatibility antigen, E-S beta chain-like	Phagosome (ko04145);; Cell adhesion molecules (ko04514);; Intestinal immune network for IgA production (ko04672);; Herpes simplex virus 1 infection (ko05168)	--	--	Immunoglobulin C1-set domain	--	S	Function unknown	MHC class II antigen beta chain [Miichthys miiuy]	biological process: immune system process (GO:0002376);; biological process: response to stimulus (GO:0050896);; cellular component: membrane (GO:0016020);; cellular component: membrane part (GO:0044425);; cellular component: cell (GO:0005623);; cellular component: macromolecular complex (GO:0032991);; cellular component: cell part (GO:0044464)
gene-tefb	tefb	15.255063	2164	13.2571	1949	12.458839	2212	5.727956	978	5.18074	847	3.813219	671	0.000275692359366942	-1.18337982145021	down	--	--	Molecular Function: transcription regulatory region sequence-specific DNA binding (GO:0000976);; Molecular Function: RNA polymerase II regulatory region sequence-specific DNA binding (GO:0000977);; Molecular Function: RNA polymerase II core promoter proximal region sequence-specific DNA binding (GO:0000978);; Molecular Function: RNA polymerase II transcription factor activity, sequence-specific D…	K09058|8.7e-112|malb:109952661|K09058 thyrotrophic embryonic factor | (RefSeq) tef; thyrotroph embryonic factor isoform X1	--	[K]	Transcription	Basic region leucine zipper	Transcription factor VBP OS=Gallus gallus OX=9031 GN=TEF PE=1 SV=2	K	Transcription	TEF transcription factor, PAR bZIP family member b isoform X1 [Sander lucioperca]	molecular function: binding (GO:0005488);; biological process: biological regulation (GO:0065007);; molecular function: nucleic acid binding transcription factor activity (GO:0001071);; biological process: metabolic process (GO:0008152);; biological process: cellular process (GO:0009987);; cellular component: cell (GO:0005623);; cellular component: cell part (GO:0044464);; cellular component: org…
gene-gpr160	gpr160	11.150178	1071	13.071427	1312	11.786285	1440	3.404388	400	4.848088000000001	525	4.532229	540	1.87806695684752e-07	-1.3002202527114	down	--	--	Cellular Component: integral component of membrane (GO:0016021);;	K08438|2.0e-111|malb:109955336|K08438 G protein-coupled receptor 160 | (RefSeq) gpr160; probable G-protein coupled receptor 160	--	--	--	--	--	T	Signal transduction mechanisms	LOW QUALITY PROTEIN: probable G-protein coupled receptor 160 [Perca flavescens]	cellular component: membrane (GO:0016020);; cellular component: membrane part (GO:0044425)
gene-LOC119892444	LOC119892444	0.085956	21	0.080082	21	0.142113	44	3.138474	918	0.403414	114	0.746404	225	0.000347131872742845	1.62178724704184	up	--	--	Molecular Function: metal ion binding (GO:0046872);;	K15689|2.1e-103|lcf:108878009|K15689 E3 ubiquitin-protein ligase NEURL3 [EC:2.3.2.27] | (RefSeq) neurl3; E3 ubiquitin-protein ligase NEURL3	--	[T]	Signal transduction mechanisms	Neuralized	--	T	Signal transduction mechanisms	protein neuralized-like [Archocentrus centrarchus]	molecular function: binding (GO:0005488)
gene-LOC119904318	LOC119904318	2.820956	320	2.901223	340	2.403625	340	1.288962	175	1.091032	142	1.069328	150	0.00265509048552084	-1.00711544410149	down	--	--	--	--	--	--	--	Cortactin-binding protein-2	Filamin A-interacting protein 1-like OS=Danio rerio OX=7955 GN=filip1l PE=2 SV=1	--	--	filamin A-interacting protein 1-like [Morone saxatilis]	--
gene-LOC119885776	LOC119885776	0.196069	18	0.186197	18	0.660839	74	1.907464	205	3.054157	313	1.811627	200	0.000747166660164969	1.54753460711441	up	--	--	Molecular Function: zinc ion binding (GO:0008270);;	K12012|3.3e-158|sdu:111219418|K12012 tripartite motif-containing protein 35 | (RefSeq) nuclear factor 7, ovary-like	--	[O]	Posttranslational modification, protein turnover, chaperones	SPRY-associated domain	Zinc-binding protein A33 OS=Pleurodeles waltl OX=8319 PE=1 SV=2	O	Posttranslational modification, protein turnover, chaperones	nuclear factor 7, brain-like [Epinephelus lanceolatus]	molecular function: binding (GO:0005488)
gene-mxd3	mxd3	2.466096	138	1.973113	114	2.313397	161	5.700146	380	5.707463	365	4.232574	291	0.00596795745974184	1.05094089145571	up	--	--	Molecular Function: protein dimerization activity (GO:0046983);;	K09114|9.4e-97|lcf:108882858|K09114 MAX dimerization protein | (RefSeq) max dimerization protein 3-like	--	[K]	Transcription	Helix-loop-helix DNA-binding domain	Max dimerization protein 3 OS=Danio rerio OX=7955 GN=mxd3 PE=2 SV=1	K	Transcription	max dimerization protein 3 [Acanthochromis polyacanthus]	molecular function: binding (GO:0005488)
gene-LOC119913033	LOC119913033	149.037369	5015	167.93483	5841	61.15316	2565	41.274067	1663	33.276424	1285	43.8386	1819	0.00548013144965715	-1.20729651932746	down	--	--	Biological Process: response to acid chemical (GO:0001101);; Cellular Component: cellular_component (GO:0005575);; Cellular Component: cell (GO:0005623);; Cellular Component: plasma membrane (GO:0005886);; Biological Process: multicellular organism development (GO:0007275);; Biological Process: nervous system development (GO:0007399);; Biological Process: central nervous system development (GO:00…	K17270|9.1e-70|lco:104937830|K17270 myelin-oligodendrocyte glycoprotein | (RefSeq) myelin-oligodendrocyte glycoprotein-like isoform X1	--	--	--	Immunoglobulin V-set domain	--	S	Function unknown	Selection and upkeep of intraepithelial T-cells protein 1 [Larimichthys crocea]	biological process: response to stimulus (GO:0050896);; cellular component: cell (GO:0005623);; cellular component: membrane (GO:0016020);; cellular component: cell part (GO:0044464);; biological process: multicellular organismal process (GO:0032501);; biological process: developmental process (GO:0032502);; biological process: single-organism process (GO:0044699);; cellular component: membrane p…
Micropterus_salmoides_newGene_1267	--	5.095132	170	5.717819	197	2.247366	94	27.699554	1106	7.865394	301	26.138817	1075	0.00349650083777935	1.38609241332713	up	--	--	--	--	--	--	--	--	--	--	--	uncharacterized protein LOC106097127 isoform X2 [Oreochromis niloticus]	--
gene-ndrg1a	ndrg1a	237.042816	18392	176.474579	14153	242.581726	23461	461.937256	42915	530.029114	47172	429.393433	41078	0.000712328472973922	1.03453559278443	up	[HR]	Coenzyme transport and metabolism;; General function prediction only	Biological Process: peripheral nervous system myelin maintenance (GO:0032287);; Biological Process: regulation of cell proliferation (GO:0042127);; Biological Process: mast cell activation (GO:0045576);;	K18266|1.4e-200|sdu:111223534|K18266 protein NDRG1 | (RefSeq) protein NDRG1-like isoform X1	--	[S]	Function unknown	Ndr family	Protein NDRG1 OS=Xenopus tropicalis OX=8364 GN=ndrg1 PE=2 SV=1	S	Function unknown	protein NDRG1-like isoform X1 [Seriola dumerili]	biological process: cellular process (GO:0009987);; biological process: multicellular organismal process (GO:0032501);; biological process: developmental process (GO:0032502);; biological process: single-organism process (GO:0044699);; biological process: cellular component organization or biogenesis (GO:0071840);; biological process: biological regulation (GO:0065007);; biological process: immun…
gene-LOC119887853	LOC119887853	5.946663	108	6.421696	121	4.731041	107	21.798807	473	14.881688	310	15.311919	343	0.000118759609798867	1.3456665144072	up	--	--	--	--	--	--	--	--	--	--	--	--	--
gene-nr1d1	nr1d1	6.866123	627	6.637562	626	3.748876	427	0.693051	76	0.183068	20	0.66432	75	6.88669299855002e-09	-2.18216994847803	down	--	--	Cellular Component: chromatin (GO:0000785);; Molecular Function: transcriptional repressor activity, RNA polymerase II transcription regulatory region sequence-specific binding (GO:0001227);; Molecular Function: steroid hormone receptor activity (GO:0003707);; Molecular Function: RNA polymerase II transcription factor activity, ligand-activated sequence-specific DNA binding (GO:0004879);; Cellula…	K03728|1.7e-245|lcf:108891029|K03728 nuclear receptor subfamily 1 group D member 1 | (RefSeq) LOW QUALITY PROTEIN: nuclear receptor subfamily 1 group D member 1-like	--	[T]	Signal transduction mechanisms	Zinc finger, C4 type (two domains)	Nuclear receptor ROR-alpha A OS=Danio rerio OX=7955 GN=roraa PE=2 SV=2	K	Transcription	PREDICTED: LOW QUALITY PROTEIN: nuclear receptor subfamily 1 group D member 1-like [Lates calcarifer]	cellular component: cell (GO:0005623);; cellular component: organelle (GO:0043226);; cellular component: organelle part (GO:0044422);; cellular component: cell part (GO:0044464);; biological process: biological regulation (GO:0065007);; molecular function: nucleic acid binding transcription factor activity (GO:0001071);; biological process: cellular process (GO:0009987);; biological process: sign…
gene-fosb	fosb	39.447102	6753	40.771543	7225	15.987917000000001	3410	10.134294	2081	4.416573	866	5.943956	1258	0.000774197106057186	-1.45787055042541	down	--	--	Molecular Function: DNA binding (GO:0003677);; Molecular Function: transcription factor activity, sequence-specific DNA binding (GO:0003700);; Cellular Component: nucleus (GO:0005634);; Biological Process: regulation of transcription from RNA polymerase II promoter (GO:0006357);;	K09029|7.5e-195|mze:101478361|K09029 protein FosB | (RefSeq) fosb; protein fosB isoform X1	--	[K]	Transcription	bZIP transcription factor	Proto-oncogene c-Fos OS=Gallus gallus OX=9031 GN=FOS PE=1 SV=1	K	Transcription	PREDICTED: protein fosB isoform X1 [Stegastes partitus]	molecular function: binding (GO:0005488);; biological process: biological regulation (GO:0065007);; molecular function: nucleic acid binding transcription factor activity (GO:0001071);; cellular component: cell (GO:0005623);; cellular component: organelle (GO:0043226);; cellular component: cell part (GO:0044464)
gene-elf3	elf3	58.545612	3829	44.586338	3015	60.505852	4933	109.616272	8585	115.020058	8629	117.584702	9483	7.58414319707269e-05	1.01515008421432	up	--	--	Molecular Function: transcription factor activity, sequence-specific DNA binding (GO:0003700);; Cellular Component: nucleus (GO:0005634);; Biological Process: transcription from RNA polymerase II promoter (GO:0006366);; Biological Process: inflammatory response (GO:0006954);; Biological Process: epithelial cell differentiation (GO:0030855);; Cellular Component: host cell nucleus (GO:0042025);; Mo…	K09429|3.8e-195|sdu:111221426|K09429 E74-like factor 3 | (RefSeq) ETS-related transcription factor Elf-3-like isoform X1	--	[K]	Transcription	Ets-domain	Protein FEV OS=Danio rerio OX=7955 GN=fev PE=2 SV=1	K	Transcription	ETS-related transcription factor Elf-3-like isoform X2 [Seriola dumerili]	biological process: biological regulation (GO:0065007);; molecular function: nucleic acid binding transcription factor activity (GO:0001071);; cellular component: cell (GO:0005623);; cellular component: organelle (GO:0043226);; cellular component: cell part (GO:0044464);; biological process: metabolic process (GO:0008152);; biological process: cellular process (GO:0009987);; biological process: r…
gene-LOC119913085	LOC119913085	0.960737	44	0.889029	42	1.100969	62	4.291545	232	4.090806	212	1.983198	111	0.00606231530489692	1.27905616350902	up	--	--	--	K11969|9.4e-45|rro:104673094|K11969 ariadne-2 [EC:2.3.2.31] | (RefSeq) E3 ubiquitin-protein ligase ARIH2-like isoform X2	--	--	--	--	--	S	Function unknown	probable E3 ubiquitin-protein ligase RNF144A-A [Trematomus bernacchii]	--
gene-zgc:136870	zgc:136870	11.880163	839	14.73208	1076	14.203786	1251	3.978741	337	5.100217	414	3.745944	327	1.62072105124206e-06	-1.37849035533009	down	--	--	Molecular Function: GTP binding (GO:0005525);;	K11833|3.0e-13|salp:111949733|K11833 ubiquitin carboxyl-terminal hydrolase 2 [EC:3.4.19.12] | (RefSeq) ubiquitin carboxyl-terminal hydrolase 2	--	--	--	AIG1 family	--	S	Function unknown	GTPase IMAP family member 7-like [Epinephelus lanceolatus]	molecular function: binding (GO:0005488)
gene-nectin4b	nectin4b	5.968478	433	5.08569	382	5.631164	507	11.537346	1002	12.653611999999999	1052	10.667321	954	0.000425041550471573	1.00418035107833	up	--	--	Biological Process: cell adhesion (GO:0007155);; Cellular Component: integral component of membrane (GO:0016021);; Biological Process: viral entry into host cell (GO:0046718);;	K06593|5.0e-220|lco:104936432|K06593 poliovirus receptor-related 4 | (RefSeq) nectin-4 isoform X1	Adherens junction (ko04520)	--	--	Immunoglobulin domain	--	T	Signal transduction mechanisms	nectin-4-like [Perca flavescens]	biological process: biological adhesion (GO:0022610);; cellular component: membrane (GO:0016020);; cellular component: membrane part (GO:0044425);; biological process: multi-organism process (GO:0051704)
gene-LOC119913379	LOC119913379	12.627481	1708	8.853602	1238	18.962152	3197	5.559066	901	3.842184	597	3.226031	538	0.00606231530489692	-1.19513496698021	down	--	--	Molecular Function: inward rectifier potassium channel activity (GO:0005242);; Cellular Component: integral component of membrane (GO:0016021);; Biological Process: regulation of ion transmembrane transport (GO:0034765);;	K05003|3.0e-225|sdu:111235671|K05003 potassium inwardly-rectifying channel subfamily J member 10 | (RefSeq) ATP-sensitive inward rectifier potassium channel 10-like isoform X1	--	[P]	Inorganic ion transport and metabolism	Inward rectifier potassium channel C-terminal domain	Inward rectifier potassium channel 2 OS=Gallus gallus OX=9031 GN=KCNJ2 PE=2 SV=1	P	Inorganic ion transport and metabolism	ATP-sensitive inward rectifier potassium channel 10-like isoform X1 [Seriola dumerili]	biological process: cellular process (GO:0009987);; biological process: single-organism process (GO:0044699);; biological process: localization (GO:0051179);; biological process: biological regulation (GO:0065007);; molecular function: transporter activity (GO:0005215);; molecular function: molecular transducer activity (GO:0060089);; cellular component: membrane (GO:0016020);; cellular component…
gene-LOC119912128	LOC119912128	24.619129	787	10.804536	357	30.125906	1201	81.304359	3112	159.026566	5830	146.653122	5780	1.05385195166027e-06	1.83332498769116	up	--	--	--	K23284|1.4e-81|lco:109138866|K23284 C1q-related factor | (RefSeq) complement C1q-like protein 2	--	--	--	C1q domain	--	--	--	hypothetical protein PFLUV_G00167450 [Perca fluviatilis]	--
gene-LOC119897558	LOC119897558	1.888031	239	1.67834	219	2.423663	382	0.140119	22	0.128141	19	0.274326	43	5.84516652148361e-16	-2.5461467897115	down	--	--	Molecular Function: transcription regulatory region sequence-specific DNA binding (GO:0000976);; Biological Process: circadian regulation of gene expression (GO:0032922);;	K21599|1.6e-194|sdu:111230139|K21599 circadian-associated transcriptional repressor | (RefSeq) circadian-associated transcriptional repressor-like	--	--	--	Circadian-associated transcriptional repressor	--	S	Function unknown	circadian-associated transcriptional repressor-like [Seriola dumerili]	molecular function: binding (GO:0005488);; biological process: multicellular organismal process (GO:0032501);; biological process: single-organism process (GO:0044699);; biological process: rhythmic process (GO:0048511);; biological process: biological regulation (GO:0065007)
gene-LOC119899780	LOC119899780	79.445618	4610	60.118671	3606	53.056751	3837	21.689808	1507	27.348021	1820	33.276363	2381	0.000900256856082738	-1.0314419574641	down	--	--	Molecular Function: structural molecule activity (GO:0005198);; Cellular Component: intermediate filament (GO:0005882);;	K07604|1.2e-168|lco:104920375|K07604 type I keratin, acidic | (RefSeq) keratin, type I cytoskeletal 19	--	--	--	Intermediate filament protein	Keratin, type I cytoskeletal 13 OS=Oncorhynchus mykiss OX=8022 GN=krt13 PE=2 SV=1	S	Function unknown	keratin, type I cytoskeletal 19-like isoform X1 [Morone saxatilis]	molecular function: structural molecule activity (GO:0005198);; cellular component: cell (GO:0005623);; cellular component: organelle (GO:0043226);; cellular component: organelle part (GO:0044422);; cellular component: cell part (GO:0044464);; cellular component: supramolecular complex (GO:0099080)
Micropterus_salmoides_newGene_3139	--	0.131379	15	0.042062	6	0.230582	18	1.232803	102	0.280038	32	1.616243	172	0.0092623826051879	1.32850005822175	up	--	--	--	K06771|3.2e-09|mze:112432095|K06771 myelin associated glycoprotein | (RefSeq) myelin-associated glycoprotein-like	Cell adhesion molecules (ko04514)	--	--	--	--	P	Inorganic ion transport and metabolism	uncharacterized protein LOC116049323 [Sander lucioperca]	--
gene-LOC119893729	LOC119893729	31.125301	2255	27.972849	2095	34.431896	3110	7.405209	643	6.478457	539	8.865565	792	4.13276227843599e-19	-1.8194664218924	down	--	--	Molecular Function: transcription regulatory region sequence-specific DNA binding (GO:0000976);; Biological Process: circadian regulation of gene expression (GO:0032922);;	K21599|4.5e-155|lcf:108886176|K21599 circadian-associated transcriptional repressor | (RefSeq) circadian-associated transcriptional repressor-like	--	--	--	Circadian-associated transcriptional repressor	--	S	Function unknown	PREDICTED: circadian-associated transcriptional repressor-like [Lates calcarifer]	molecular function: binding (GO:0005488);; biological process: multicellular organismal process (GO:0032501);; biological process: single-organism process (GO:0044699);; biological process: rhythmic process (GO:0048511);; biological process: biological regulation (GO:0065007)
gene-LOC119884280	LOC119884280	1.224113	52	2.205908	96	1.747979	92	6.852964	343	4.921725	237	4.359526	224	0.00264934379288591	1.26205644290533	up	--	--	Cellular Component: integral component of membrane (GO:0016021);;	K06751|5.5e-123|sdu:111239426|K06751 MHC class I antigen | (RefSeq) major histocompatibility complex class I-related gene protein-like	Endocytosis (ko04144);; Phagosome (ko04145);; Cellular senescence (ko04218);; Cell adhesion molecules (ko04514);; Herpes simplex virus 1 infection (ko05168)	--	--	Class I Histocompatibility antigen, domains alpha 1 and 2	Class I histocompatibility antigen, F10 alpha chain OS=Gallus gallus OX=9031 PE=1 SV=1	S	Function unknown	major histocompatibility class I receptor [Sander vitreus]	cellular component: membrane (GO:0016020);; cellular component: membrane part (GO:0044425)
gene-si:ch211-127i16.2	si:ch211-127i16.2	0.164654	10	0.335367	20	0.191638	14	2.24641	149	1.272303	81	2.252894	154	5.42017980787982e-07	1.94718062112728	up	[E]	Amino acid transport and metabolism	Molecular Function: oxidoreductase activity (GO:0016491);; Biological Process: oxidation-reduction process (GO:0055114);;	K00274|3.9e-270|lcf:108884103|K00274 monoamine oxidase [EC:1.4.3.4] | (RefSeq) probable flavin-containing monoamine oxidase A	Glycine, serine and threonine metabolism (ko00260);; Arginine and proline metabolism (ko00330);; Histidine metabolism (ko00340);; Tyrosine metabolism (ko00350);; Phenylalanine metabolism (ko00360);; Tryptophan metabolism (ko00380);; Drug metabolism - cytochrome P450 (ko00982)	[Q]	Secondary metabolites biosynthesis, transport and catabolism	Flavin containing amine oxidoreductase	Amine oxidase [flavin-containing] OS=Oncorhynchus mykiss OX=8022 GN=mao PE=2 SV=2	Q	Secondary metabolites biosynthesis, transport and catabolism	hypothetical protein PFLUV_G00199450 [Perca fluviatilis]	molecular function: catalytic activity (GO:0003824);; biological process: metabolic process (GO:0008152);; biological process: single-organism process (GO:0044699)
gene-ciarta	ciarta	20.419987	2024	12.624956	1293	15.582888	1925	2.033821	242	1.152064	131	1.464656	179	1.00439211801129e-19	-2.64939298292726	down	--	--	Molecular Function: transcription regulatory region sequence-specific DNA binding (GO:0000976);; Biological Process: circadian regulation of gene expression (GO:0032922);;	K21599|3.0e-135|lcf:108888885|K21599 circadian-associated transcriptional repressor | (RefSeq) circadian-associated transcriptional repressor-like	--	--	--	Circadian-associated transcriptional repressor	--	S	Function unknown	circadian associated repressor of transcription a [Morone saxatilis]	molecular function: binding (GO:0005488);; biological process: multicellular organismal process (GO:0032501);; biological process: single-organism process (GO:0044699);; biological process: rhythmic process (GO:0048511);; biological process: biological regulation (GO:0065007)
gene-pip5k1bb	pip5k1bb	36.063866	3396	39.632187	3858	29.950424	3516	16.616199	1874	14.502918	1567	12.702633	1475	0.000752623146655643	-1.04719768234125	down	--	--	Biological Process: reproduction (GO:0000003);; Biological Process: microtubule cytoskeleton organization (GO:0000226);; Molecular Function: 1-phosphatidylinositol-3-phosphate 5-kinase activity (GO:0000285);; Cellular Component: uropod (GO:0001931);; Biological Process: regulation of protein phosphorylation (GO:0001932);; Biological Process: negative regulation of protein phosphorylation (GO:0001…	K00889|1.7e-294|lco:104929257|K00889 1-phosphatidylinositol-4-phosphate 5-kinase [EC:2.7.1.68] | (RefSeq) phosphatidylinositol 4-phosphate 5-kinase type-1 beta	Inositol phosphate metabolism (ko00562);; Phosphatidylinositol signaling system (ko04070);; Endocytosis (ko04144);; Focal adhesion (ko04510);; Regulation of actin cytoskeleton (ko04810)	[T]	Signal transduction mechanisms	Phosphatidylinositol-4-phosphate 5-Kinase	Phosphatidylinositol 4-phosphate 5-kinase type-1 beta OS=Gallus gallus OX=9031 GN=PIP5K1B PE=2 SV=1	T	Signal transduction mechanisms	phosphatidylinositol 4-phosphate 5-kinase type-1 beta [Morone saxatilis]	biological process: reproduction (GO:0000003);; biological process: cellular process (GO:0009987);; biological process: cellular component organization or biogenesis (GO:0071840);; biological process: metabolic process (GO:0008152);; biological process: single-organism process (GO:0044699);; molecular function: catalytic activity (GO:0003824);; cellular component: cell (GO:0005623);; cellular com…
gene-per2	per2	1.991215	265	3.2098970000000002	437	5.4121690000000005	886	0.988285	157	0.768651	117	0.892729	148	0.00089660338509911	-1.3892012160418	down	--	--	Molecular Function: chromatin binding (GO:0003682);; Biological Process: response to cold (GO:0009409);; Biological Process: response to UV (GO:0009411);; Biological Process: negative regulation of angiogenesis (GO:0016525);; Biological Process: response to hydrogen peroxide (GO:0042542);; Biological Process: positive regulation of circadian rhythm (GO:0042753);; Biological Process: entrainment o…	K02633|0.0e+00|lcf:108883459|K02633 period circadian protein 2 | (RefSeq) period circadian protein homolog 2-like isoform X1	--	[T]	Signal transduction mechanisms	Period protein 2/3C-terminal region	Period circadian protein homolog 2 OS=Gallus gallus OX=9031 GN=PER2 PE=2 SV=1	T	Signal transduction mechanisms	period circadian protein homolog 2 isoform X1 [Larimichthys crocea]	molecular function: binding (GO:0005488);; biological process: response to stimulus (GO:0050896);; biological process: biological regulation (GO:0065007);; biological process: behavior (GO:0007610);; biological process: rhythmic process (GO:0048511)
gene-LOC119897340	LOC119897340	6.305428	164	5.891076	158	41.712556	1334	2.010845	63	0.233166	7	0.8328089999999999	28	0.00912538829517543	-1.29347842330834	down	[O]	Posttranslational modification, protein turnover, chaperones	Molecular Function: serine-type endopeptidase activity (GO:0004252);;	K01312|1.2e-122|sdu:111236042|K01312 trypsin [EC:3.4.21.4] | (RefSeq) trypsin-1-like	Neuroactive ligand-receptor interaction (ko04080)	[E]	Amino acid transport and metabolism	Trypsin	Trypsin-1 OS=Salmo salar OX=8030 PE=1 SV=1	E	Amino acid transport and metabolism	hypothetical protein EPR50_G00062180 [Perca flavescens]	biological process: metabolic process (GO:0008152);; molecular function: catalytic activity (GO:0003824)
gene-LOC119898768	LOC119898768	4.835145	411	4.191495	369	4.286354	454	10.099935	1028	6.658974	649	14.673094	1537	0.00548013144965715	1.04925642450282	up	--	--	Cellular Component: cytoplasm (GO:0005737);; Biological Process: negative regulation of JAK-STAT cascade (GO:0046426);; Biological Process: regulation of interferon-gamma-mediated signaling pathway (GO:0060334);;	K04694|2.3e-97|lcf:108888466|K04694 suppressor of cytokine signaling 1 | (RefSeq) LOW QUALITY PROTEIN: suppressor of cytokine signaling 1-like	Ubiquitin mediated proteolysis (ko04120);; Insulin signaling pathway (ko04910)	[T]	Signal transduction mechanisms	SH2 domain	--	T	Signal transduction mechanisms	suppressor of cytokine signaling 1-like [Sander lucioperca]	cellular component: cell (GO:0005623);; cellular component: cell part (GO:0044464);; biological process: biological regulation (GO:0065007)
gene-LOC119913020	LOC119913020	5.891762	225	10.063382	396	5.507008	262	2.463965	113	1.071289	47	1.956437	92	0.00242367358905512	-1.33352070734753	down	--	--	Biological Process: response to acid chemical (GO:0001101);; Cellular Component: cellular_component (GO:0005575);; Cellular Component: cell (GO:0005623);; Cellular Component: plasma membrane (GO:0005886);; Biological Process: multicellular organism development (GO:0007275);; Biological Process: nervous system development (GO:0007399);; Biological Process: central nervous system development (GO:00…	K17270|4.0e-71|lco:104937830|K17270 myelin-oligodendrocyte glycoprotein | (RefSeq) myelin-oligodendrocyte glycoprotein-like isoform X1	--	--	--	Immunoglobulin V-set domain	--	S	Function unknown	myelin-oligodendrocyte glycoprotein-like [Morone saxatilis]	biological process: response to stimulus (GO:0050896);; cellular component: cell (GO:0005623);; cellular component: membrane (GO:0016020);; cellular component: cell part (GO:0044464);; biological process: multicellular organismal process (GO:0032501);; biological process: developmental process (GO:0032502);; biological process: single-organism process (GO:0044699);; cellular component: membrane p…
gene-tert	tert	7.270304	784	9.884911	1102	8.984715	1208	14.346181	1852	18.624214	2303	25.496916	3389	0.00138697862336271	1.03421539642792	up	--	--	Cellular Component: chromosome, telomeric region (GO:0000781);; Molecular Function: DNA binding (GO:0003677);; Molecular Function: telomerase RNA reverse transcriptase activity (GO:0003721);; Cellular Component: nucleus (GO:0005634);; Molecular Function: metal ion binding (GO:0046872);;	K11126|0.0e+00|lco:104920435|K11126 telomerase reverse transcriptase [EC:2.7.7.49] | (RefSeq) tert; telomerase reverse transcriptase isoform X1	--	[LB]	Replication, recombination and repair;; Chromatin structure and dynamics	Telomerase ribonucleoprotein complex - RNA binding domain	Telomerase reverse transcriptase OS=Takifugu rubripes OX=31033 GN=tert PE=1 SV=1	--	--	telomerase reverse transcriptase [Sander lucioperca]	cellular component: cell (GO:0005623);; cellular component: organelle (GO:0043226);; cellular component: organelle part (GO:0044422);; cellular component: cell part (GO:0044464);; molecular function: binding (GO:0005488);; biological process: metabolic process (GO:0008152);; biological process: cellular process (GO:0009987);; molecular function: catalytic activity (GO:0003824)
gene-LOC119912510	LOC119912510	0.359446	55	0.262687	42	0.446903	85	2.419567	441	0.516054	90	2.902038	544	0.00600567819275025	1.36342668988815	up	[L]	Replication, recombination and repair	--	K12797|7.6e-48|mdo:100018349|K12797 caspase recruitment domain-containing protein 6 | (RefSeq) CARD6; caspase recruitment domain family member 6	NOD-like receptor signaling pathway (ko04621)	--	--	Root hair defective 3 GTP-binding protein (RHD3)	--	S	Function unknown	interferon-induced very large GTPase 1-like isoform X1 [Sander lucioperca]	--
gene-clocka	clocka	0.755227	137	0.414813	78	0.612477	139	3.505754	760	2.7358890000000002	570	2.320431	520	4.69259404538342e-08	1.81418594411666	up	--	--	Molecular Function: DNA binding (GO:0003677);; Molecular Function: transcription factor activity, sequence-specific DNA binding (GO:0003700);; Cellular Component: nucleus (GO:0005634);; Cellular Component: transcription factor complex (GO:0005667);; Cellular Component: cytoplasm (GO:0005737);; Molecular Function: protein dimerization activity (GO:0046983);;	K02223|0.0e+00|lco:104919094|K02223 circadian locomoter output cycles kaput protein [EC:2.3.1.48] | (RefSeq) clock; circadian locomoter output cycles protein kaput isoform X1	--	[K]	Transcription	PAS domain	Circadian locomoter output cycles protein kaput OS=Tyto alba OX=56313 GN=CLOCK PE=2 SV=1	K	Transcription	circadian locomoter output cycles protein kaput isoform X1 [Morone saxatilis]	molecular function: binding (GO:0005488);; biological process: biological regulation (GO:0065007);; molecular function: nucleic acid binding transcription factor activity (GO:0001071);; cellular component: cell (GO:0005623);; cellular component: organelle (GO:0043226);; cellular component: cell part (GO:0044464);; cellular component: macromolecular complex (GO:0032991)
Micropterus_salmoides_newGene_1817	--	16.012430000000002	1919	10.619006	1518	30.211897	4778	45.81625	7014	120.606866	17583	67.737788	10997	0.00192055379639918	1.39834599317085	up	[Q]	Secondary metabolites biosynthesis, transport and catabolism	Molecular Function: peroxidase activity (GO:0004601);; Biological Process: defense response (GO:0006952);; Biological Process: response to oxidative stress (GO:0006979);; Molecular Function: heme binding (GO:0020037);;	K10789|5.1e-266|sasa:100380666|K10789 myeloperoxidase [EC:1.11.2.2] | (RefSeq) perm; eosinophil peroxidase	Drug metabolism - other enzymes (ko00983);; Phagosome (ko04145)	[R]	General function prediction only	Animal haem peroxidase	Peroxidasin OS=Xenopus tropicalis OX=8364 GN=pxdn PE=2 SV=1	S	Function unknown	myeloperoxidase [Siniperca chuatsi]	biological process: metabolic process (GO:0008152);; biological process: cellular process (GO:0009987);; biological process: single-organism process (GO:0044699);; biological process: response to stimulus (GO:0050896);; biological process: detoxification (GO:0098754);; molecular function: catalytic activity (GO:0003824);; molecular function: antioxidant activity (GO:0016209);; molecular function:…
gene-plekhn1	plekhn1	4.489594	386	4.629022	411	4.253996	455	1.639781	169	1.9705720000000002	195	1.843439	196	6.2457477203331e-05	-1.09637989102034	down	--	--	Biological Process: positive regulation of apoptotic process (GO:0043065);; Molecular Function: cardiolipin binding (GO:1901612);;	K23628|2.1e-21|egz:104133395|K23628 tubulin--tyrosine ligase like protein 10 | (RefSeq) TTLL10; inactive polyglycylase TTLL10	--	--	--	PH domain	--	T	Signal transduction mechanisms	pleckstrin homology domain-containing family N member 1 [Perca flavescens]	biological process: biological regulation (GO:0065007);; molecular function: binding (GO:0005488)
gene-si:dkeyp-118h9.7	si:dkeyp-118h9.7	0.868294	356	1.598581	677	1.609742	822	6.101315	2991	2.519186	1183	6.819674	3443	0.00090865729260521	1.39405794474568	up	--	--	--	K17592|0.0e+00|lcf:108880426|K17592 sacsin | (RefSeq) sacsin-like	--	--	--	HEPN domain	--	S	Function unknown	sacsin [Sander lucioperca]	--
gene-dbpb	dbpb	34.248047	4121	30.004419	3732	26.389082	3958	9.742222	1404	10.62555	1467	6.417363	952	2.92620738551563e-05	-1.38016467996753	down	--	--	Molecular Function: transcription factor activity, sequence-specific DNA binding (GO:0003700);; Biological Process: regulation of transcription from RNA polymerase II promoter (GO:0006357);;	K09057|2.0e-156|nfu:107379564|K09057 hepatic leukemia factor | (RefSeq) dbp; D site-binding protein	--	[K]	Transcription	Basic region leucine zipper	Transcription factor VBP OS=Gallus gallus OX=9031 GN=TEF PE=1 SV=2	K	Transcription	PREDICTED: D site-binding protein [Nothobranchius furzeri]	biological process: biological regulation (GO:0065007);; molecular function: nucleic acid binding transcription factor activity (GO:0001071)
gene-crot	crot	5.367771	533	4.156339	469	8.249796	854	14.043572000000001	1658	13.728227	1653	11.823675	1382	0.00121269625659509	1.10308509421628	up	--	--	Molecular Function: transferase activity, transferring acyl groups (GO:0016746);;	K05940|0.0e+00|sdu:111237186|K05940 carnitine O-octanoyltransferase [EC:2.3.1.137] | (RefSeq) crot; peroxisomal carnitine O-octanoyltransferase	Peroxisome (ko04146)	[I]	Lipid transport and metabolism	Choline/Carnitine o-acyltransferase	Carnitine O-acetyltransferase OS=Columba livia OX=8932 GN=CRAT PE=1 SV=1	I	Lipid transport and metabolism	peroxisomal carnitine O-octanoyltransferase [Seriola dumerili]	molecular function: catalytic activity (GO:0003824)
Micropterus_salmoides_newGene_1315	--	11.768716	209	8.198641	150	9.066059	200	22.317577	473	17.175358	349	30.631392	668	0.00254896531591175	1.08837111278762	up	--	--	--	--	--	--	--	--	--	--	--	--	--
gene-dusp8a	dusp8a	14.643278	2058	9.93601	1443	12.790703	2240	5.413465	911	4.210769	679	5.468494	948	0.000173775769579252	-1.10008769123242	down	--	--	Molecular Function: protein tyrosine phosphatase activity (GO:0004725);; Molecular Function: MAP kinase tyrosine/serine/threonine phosphatase activity (GO:0017017);;	K04459|0.0e+00|lcf:108875362|K04459 dual specificity MAP kinase phosphatase [EC:3.1.3.16 3.1.3.48] | (RefSeq) dusp8; dual specificity protein phosphatase 8 isoform X1	MAPK signaling pathway (ko04010)	[V]	Defense mechanisms	Dual specificity phosphatase, catalytic domain	Dual specificity protein phosphatase 4 OS=Gallus gallus OX=9031 GN=DUSP4 PE=2 SV=1	V	Defense mechanisms	dual specificity protein phosphatase 8a [Morone saxatilis]	biological process: metabolic process (GO:0008152);; biological process: cellular process (GO:0009987);; molecular function: catalytic activity (GO:0003824);; biological process: biological regulation (GO:0065007)
gene-LOC119885864	LOC119885864	0.078849	6	0.096776	8	0.388582	35	1.287474	109	1.742262	141	0.984175	86	0.00709809039272899	1.35998219938305	up	--	--	Molecular Function: zinc ion binding (GO:0008270);;	K12012|1.3e-175|lco:104938360|K12012 tripartite motif-containing protein 35 | (RefSeq) nuclear factor 7, ovary	--	[O]	Posttranslational modification, protein turnover, chaperones	SPRY-associated domain	Zinc-binding protein A33 OS=Pleurodeles waltl OX=8319 PE=1 SV=2	O	Posttranslational modification, protein turnover, chaperones	nuclear factor 7, ovary-like [Maylandia zebra]	molecular function: binding (GO:0005488)
Micropterus_salmoides_newGene_3140	--	0.14112999999999998	13	0.082837	8	0.28754899999999994	22	0.946665	101	1.1624539999999999	133	1.901239	223	1.73962059334162e-08	2.12540662249533	up	--	--	--	K06771|3.1e-09|mze:112432095|K06771 myelin associated glycoprotein | (RefSeq) myelin-associated glycoprotein-like	Cell adhesion molecules (ko04514)	--	--	--	--	P	Inorganic ion transport and metabolism	uncharacterized protein LOC116049323 [Sander lucioperca]	--
gene-LOC119886283	LOC119886283	14.744057	699	8.124939	399	5.173081	306	2.998344	171	2.093026	114	3.134947	184	0.00972710612201392	-1.20477348869678	down	--	--	Biological Process: signal transduction (GO:0007165);; Cellular Component: integral component of membrane (GO:0016021);;	K03158|2.1e-34|mze:101479156|K03158 tumor necrosis factor receptor superfamily member 1A | (RefSeq) tumor necrosis factor receptor superfamily member 1A isoform X1	MAPK signaling pathway (ko04010);; Cytokine-cytokine receptor interaction (ko04060);; mTOR signaling pathway (ko04150);; Apoptosis (ko04210);; Necroptosis (ko04217);; Adipocytokine signaling pathway (ko04920);; Salmonella infection (ko05132);; Herpes simplex virus 1 infection (ko05168)	--	--	TNFR/NGFR cysteine-rich region	--	T	Signal transduction mechanisms	tumor necrosis factor receptor superfamily member 16-like [Maylandia zebra]	biological process: cellular process (GO:0009987);; biological process: biological regulation (GO:0065007);; cellular component: membrane (GO:0016020);; cellular component: membrane part (GO:0044425)
gene-cipcb	cipcb	24.766464	4258	19.562895	3477	12.856871	2756	7.800898	1606	6.329463	1249	6.437611	1365	0.0014107225723226	-1.15641354095431	down	--	--	Biological Process: negative regulation of circadian rhythm (GO:0042754);; Biological Process: negative regulation of transcription, DNA-templated (GO:0045892);;	K21989|8.3e-07|sasa:106611026|K21989 calcium permeable stress-gated cation channel | (RefSeq) calcium permeable stress-gated cation channel 1-like	--	--	--	Clock interacting protein circadian	CLOCK-interacting pacemaker OS=Xenopus laevis OX=8355 GN=cipc PE=2 SV=1	S	Function unknown	CLOCK-interacting pacemaker-like [Seriola dumerili]	biological process: biological regulation (GO:0065007)
gene-per1b	per1b	21.403964000000002	3860	26.601454999999998	4959	25.238678999999998	5673	4.303945000000001	930	2.658172	554	3.014151	671	1.96065961218161e-19	-2.36980355604609	down	--	--	Biological Process: negative regulation of transcription from RNA polymerase II promoter (GO:0000122);; Molecular Function: transcription regulatory region sequence-specific DNA binding (GO:0000976);; Molecular Function: RNA polymerase II regulatory region sequence-specific DNA binding (GO:0000977);; Molecular Function: RNA polymerase II core promoter proximal region sequence-specific DNA binding…	K21944|0.0e+00|lcf:108897052|K21944 period circadian protein 1 | (RefSeq) LOW QUALITY PROTEIN: period circadian protein homolog 1-like	--	[T]	Signal transduction mechanisms	Period protein 2/3C-terminal region	Period circadian protein homolog 2 OS=Gallus gallus OX=9031 GN=PER2 PE=2 SV=1	T	Signal transduction mechanisms	period 1 [Siniperca chuatsi]	biological process: biological regulation (GO:0065007);; molecular function: binding (GO:0005488);; cellular component: cell (GO:0005623);; cellular component: cell part (GO:0044464);; cellular component: organelle (GO:0043226);; cellular component: organelle part (GO:0044422);; biological process: cellular process (GO:0009987);; biological process: cellular component organization or biogenesis (…
gene-LOC119913221	LOC119913221	0.943056	109	1.332149	184	1.8923320000000001	253	5.350669000000001	674	2.3575959999999996	360	4.583262	618	0.00493004897751335	1.18022498908761	up	--	--	Molecular Function: protein binding (GO:0005515);;	K22614|0.0e+00|lcf:108873725|K22614 NLR family CARD domain-containing protein 3 | (RefSeq) LOW QUALITY PROTEIN: protein NLRC3-like	--	--	--	NACHT domain	Neoverrucotoxin subunit beta OS=Synanceia verrucosa OX=51996 PE=1 SV=1	S	Function unknown	NLR family CARD domain-containing protein 3-like [Perca flavescens]	molecular function: binding (GO:0005488)
gene-si:dkey-256h2.1	si:dkey-256h2.1	6.776842	451	7.619028	524	8.724684	723	17.743757	1413	15.635429	1193	17.356352	1423	2.83775511517072e-05	1.0729795508452	up	--	--	Molecular Function: oxidoreductase activity, acting on paired donors, with incorporation or reduction of molecular oxygen, reduced ascorbate as one donor, and incorporation of one atom of oxygen (GO:0016715);;	--	--	--	--	Peptide-N-glycosidase F, C terminal	--	S	Function unknown	uncharacterized protein LOC116394334 [Anarrhichthys ocellatus]	biological process: metabolic process (GO:0008152);; biological process: single-organism process (GO:0044699);; molecular function: catalytic activity (GO:0003824)
gene-LOC119912950	LOC119912950	39.172447	1140	38.823288	1167	24.482584	888	70.074921	2441	97.246773	3244	109.158775	3915	9.26957508742728e-05	1.24833306667388	up	[M]	Cell wall/membrane/envelope biogenesis	Molecular Function: carbohydrate binding (GO:0030246);;	K22244|1.4e-54|lcf:108885875|K22244 regenerating islet-derived protein 4 | (RefSeq) ladderlectin-like	--	--	--	Lectin C-type domain	Type-2 ice-structuring protein OS=Hemitripterus americanus OX=8094 PE=1 SV=2	--	--	ice structuring protein [Micropterus salmoides]	molecular function: binding (GO:0005488)
gene-LOC119892446	LOC119892446	0.484825	28	0.448767	27	0.398379	29	2.998048	206	1.220555	80	4.141049	292	5.79061010538384e-05	1.682023894289	up	--	--	Molecular Function: metal ion binding (GO:0046872);;	K15689|7.2e-101|lcf:108878009|K15689 E3 ubiquitin-protein ligase NEURL3 [EC:2.3.2.27] | (RefSeq) neurl3; E3 ubiquitin-protein ligase NEURL3	--	[T]	Signal transduction mechanisms	Neuralized	--	T	Signal transduction mechanisms	protein neuralized-like [Archocentrus centrarchus]	molecular function: binding (GO:0005488)
gene-LOC119910748	LOC119910748	7.135095	274	22.336196	896	4.389178	213	1.880156	88	2.536744	112	1.456797	72	0.00933416945188531	-1.31977442770627	down	[P]	Inorganic ion transport and metabolism	Molecular Function: gamma-glutamylcyclotransferase activity (GO:0003839);; Biological Process: glutathione catabolic process (GO:0006751);;	K07232|2.0e-98|sdu:111225503|K07232 glutathione-specific gamma-glutamylcyclotransferase [EC:4.3.2.7] | (RefSeq) glutathione-specific gamma-glutamylcyclotransferase 1-like	Glutathione metabolism (ko00480)	[P]	Inorganic ion transport and metabolism	ChaC-like protein	Glutathione-specific gamma-glutamylcyclotransferase 1 OS=Danio rerio OX=7955 GN=chac1 PE=3 SV=1	P	Inorganic ion transport and metabolism	glutathione-specific gamma-glutamylcyclotransferase 1-like isoform X1 [Morone saxatilis]	molecular function: catalytic activity (GO:0003824);; biological process: metabolic process (GO:0008152);; biological process: cellular process (GO:0009987)
gene-hoga1	hoga1	2.866155	166	2.557576	153	2.770122	200	5.639393	391	5.484923	364	6.310613	451	0.000111650056577441	1.02730876581863	up	[EM]	Amino acid transport and metabolism;; Cell wall/membrane/envelope biogenesis	Molecular Function: molecular_function (GO:0003674);; Molecular Function: catalytic activity (GO:0003824);; Molecular Function: binding (GO:0005488);; Molecular Function: protein binding (GO:0005515);; Cellular Component: cellular_component (GO:0005575);; Cellular Component: intracellular (GO:0005622);; Cellular Component: cell (GO:0005623);; Cellular Component: cytoplasm (GO:0005737);; Cellular …	K18123|4.0e-169|lco:104930035|K18123 4-hydroxy-2-oxoglutarate aldolase [EC:4.1.3.16] | (RefSeq) hoga1; 4-hydroxy-2-oxoglutarate aldolase, mitochondrial	Arginine and proline metabolism (ko00330);; Glyoxylate and dicarboxylate metabolism (ko00630)	--	--	Dihydrodipicolinate synthetase family	4-hydroxy-2-oxoglutarate aldolase, mitochondrial OS=Danio rerio OX=7955 GN=zgc:77082 PE=2 SV=1	T	Signal transduction mechanisms	4-hydroxy-2-oxoglutarate aldolase, mitochondrial [Anarrhichthys ocellatus]	molecular function: catalytic activity (GO:0003824);; molecular function: binding (GO:0005488);; cellular component: cell (GO:0005623);; cellular component: cell part (GO:0044464);; cellular component: organelle (GO:0043226);; cellular component: membrane-enclosed lumen (GO:0031974);; cellular component: organelle part (GO:0044422);; biological process: metabolic process (GO:0008152);; biological…
gene-LOC119884027	LOC119884027	8.632993	339	4.732131	192	6.886076	337	16.216343	761	12.353672	556	17.15122	829	0.00942907532881852	1.00870892204659	up	[H]	Coenzyme transport and metabolism	Molecular Function: methyltransferase activity (GO:0008168);;	K22438|2.8e-91|sdu:111218885|K22438 trans-aconitate 3-methyltransferase [EC:2.1.1.145] | (RefSeq) putative methyltransferase DDB_G0268948	--	[R]	General function prediction only	Methyltransferase domain	--	Q	Secondary metabolites biosynthesis, transport and catabolism	hypothetical protein PFLUV_G00142560 [Perca fluviatilis]	molecular function: catalytic activity (GO:0003824)
gene-LOC119883089	LOC119883089	2.603976	571	4.316938	978	3.24043	886	1.284357	338	0.945561	238	0.958371	260	0.000152429360631795	-1.30814580257296	down	--	--	Biological Process: negative regulation of transcription from RNA polymerase II promoter (GO:0000122);; Biological Process: polysaccharide biosynthetic process (GO:0000271);; Molecular Function: transcription regulatory region sequence-specific DNA binding (GO:0000976);; Molecular Function: RNA polymerase II regulatory region sequence-specific DNA binding (GO:0000977);; Molecular Function: RNA po…	K02633|0.0e+00|kmr:108239359|K02633 period circadian protein 2 | (RefSeq) period circadian protein homolog 2	--	[T]	Signal transduction mechanisms	Period protein 2/3C-terminal region	Period circadian protein homolog 2 OS=Gallus gallus OX=9031 GN=PER2 PE=2 SV=1	T	Signal transduction mechanisms	period circadian protein homolog 2-like [Morone saxatilis]	biological process: biological regulation (GO:0065007);; biological process: metabolic process (GO:0008152);; biological process: single-organism process (GO:0044699);; molecular function: binding (GO:0005488);; molecular function: transcription factor activity, protein binding (GO:0000988);; biological process: response to stimulus (GO:0050896);; biological process: multicellular organismal proc…
gene-LOC119912422	LOC119912422	94.799416	3587	135.751877	5309	211.58403	9979	564.38446	25568	362.989777	15753	439.133728	20486	0.000900256856082738	1.30004849610411	up	--	--	Biological Process: immune response (GO:0006955);; Cellular Component: integral component of membrane (GO:0016021);; Biological Process: antigen processing and presentation (GO:0019882);; Cellular Component: MHC class II protein complex (GO:0042613);;	K06752|2.2e-119|lcf:108882209|K06752 MHC class II antigen | (RefSeq) H-2 class II histocompatibility antigen, E-S beta chain-like	Phagosome (ko04145);; Cell adhesion molecules (ko04514);; Intestinal immune network for IgA production (ko04672);; Herpes simplex virus 1 infection (ko05168)	--	--	Immunoglobulin C1-set domain	--	S	Function unknown	MHC class II antigen [Epinephelus coioides]	biological process: immune system process (GO:0002376);; biological process: response to stimulus (GO:0050896);; cellular component: membrane (GO:0016020);; cellular component: membrane part (GO:0044425);; cellular component: cell (GO:0005623);; cellular component: macromolecular complex (GO:0032991);; cellular component: cell part (GO:0044464)
gene-LOC119912424	LOC119912424	15.457999	774	23.403048	1210	21.089931	1315	59.047146	3537	34.806255	1997	42.953705	2650	0.0092623826051879	1.02462986686805	up	--	--	Biological Process: immune response (GO:0006955);; Cellular Component: integral component of membrane (GO:0016021);; Biological Process: antigen processing and presentation (GO:0019882);; Cellular Component: MHC class II protein complex (GO:0042613);;	K06752|5.8e-112|lcf:108882209|K06752 MHC class II antigen | (RefSeq) H-2 class II histocompatibility antigen, E-S beta chain-like	Phagosome (ko04145);; Cell adhesion molecules (ko04514);; Intestinal immune network for IgA production (ko04672);; Herpes simplex virus 1 infection (ko05168)	--	--	Immunoglobulin C1-set domain	Class I histocompatibility antigen, F10 alpha chain OS=Gallus gallus OX=9031 PE=1 SV=1	S	Function unknown	MHC class II antigen [Epinephelus coioides]	biological process: immune system process (GO:0002376);; biological process: response to stimulus (GO:0050896);; cellular component: membrane (GO:0016020);; cellular component: membrane part (GO:0044425);; cellular component: cell (GO:0005623);; cellular component: macromolecular complex (GO:0032991);; cellular component: cell part (GO:0044464)
gene-si:ch211-212k18.15	si:ch211-212k18.15	5.703046	211	5.834335	223	7.5846	349	14.146113	625	10.643676	450	19.643862	893	0.00361875769659282	1.04586530446465	up	--	--	Molecular Function: ubiquitin-protein transferase activity (GO:0004842);;	K11969|9.3e-63|rro:104673094|K11969 ariadne-2 [EC:2.3.2.31] | (RefSeq) E3 ubiquitin-protein ligase ARIH2-like isoform X2	--	--	--	IBR domain, a half RING-finger domain	--	S	Function unknown	PREDICTED: probable E3 ubiquitin-protein ligase ARI5 [Lates calcarifer]	molecular function: catalytic activity (GO:0003824)
gene-LOC119881926	LOC119881926	1.153547	112	1.60885	161	1.199583	145	24.908978	2877	4.520167	500	7.226672	860	5.57224662364788e-05	1.75138609760714	up	--	--	--	--	--	--	--	Thrombomodulin like fifth domain, EGF-like	--	--	--	--	--
gene-klf4	klf4	38.329174	2306	64.182381	3990	27.191177	2039	12.246535	882	7.040748	486	9.405202	698	3.07898221279503e-05	-1.56952920600388	down	--	--	Biological Process: negative regulation of transcription from RNA polymerase II promoter (GO:0000122);; Cellular Component: nuclear chromosome (GO:0000228);; Cellular Component: chromatin (GO:0000785);; Cellular Component: nuclear chromatin (GO:0000790);; Cellular Component: euchromatin (GO:0000791);; Molecular Function: transcription regulatory region sequence-specific DNA binding (GO:0000976);;…	K17846|1.7e-183|lco:104928402|K17846 krueppel-like factor 4 | (RefSeq) klf4; Krueppel-like factor 4 isoform X1	--	[R]	General function prediction only	Zinc finger, C2H2 type	Transcription factor Sp8 OS=Xenopus laevis OX=8355 GN=sp8 PE=2 SV=1	K	Transcription	Krueppel-like factor 4 isoform X1 [Larimichthys crocea]	biological process: biological regulation (GO:0065007);; cellular component: cell (GO:0005623);; cellular component: organelle (GO:0043226);; cellular component: organelle part (GO:0044422);; cellular component: cell part (GO:0044464);; cellular component: membrane-enclosed lumen (GO:0031974);; molecular function: binding (GO:0005488);; molecular function: nucleic acid binding transcription facto…
gene-LOC119899726	LOC119899726	17.354609	1597	17.487144	1664	12.737833	1461	7.920837	873	6.134732	648	6.082394	691	0.00289589815713584	-1.00692611421319	down	--	--	Biological Process: negative regulation of transcription from RNA polymerase II promoter (GO:0000122);; Cellular Component: ubiquitin ligase complex (GO:0000151);; Cellular Component: nuclear ubiquitin ligase complex (GO:0000152);; Molecular Function: regulatory region nucleic acid binding (GO:0001067);; Molecular Function: molecular_function (GO:0003674);; Molecular Function: nucleic acid bindin…	K11452|7.1e-254|lco:104921555|K11452 chromobox protein 4 [EC:2.3.2.-] | (RefSeq) cbx4; E3 SUMO-protein ligase CBX4	--	[B]	Chromatin structure and dynamics	Chromo (CHRromatin Organisation MOdifier) domain	--	B	Chromatin structure and dynamics	E3 SUMO-protein ligase CBX4 [Sparus aurata]	biological process: biological regulation (GO:0065007);; cellular component: cell (GO:0005623);; cellular component: macromolecular complex (GO:0032991);; cellular component: cell part (GO:0044464);; cellular component: organelle (GO:0043226);; cellular component: organelle part (GO:0044422);; molecular function: binding (GO:0005488);; molecular function: transcription factor activity, protein bi…
gene-per3	per3	26.253979	4326	29.355026	5000	19.874897	4083	4.444414	877	3.645446	689	5.60508	1139	9.95807197144442e-19	-2.11561665128729	down	--	--	Biological Process: photoperiodism (GO:0009648);; Biological Process: circadian regulation of gene expression (GO:0032922);;	K21945|0.0e+00|sdu:111221955|K21945 period circadian protein 3 | (RefSeq) period circadian protein homolog 3-like isoform X1	--	[T]	Signal transduction mechanisms	Period protein 2/3C-terminal region	Period circadian protein homolog 2 OS=Gallus gallus OX=9031 GN=PER2 PE=2 SV=1	T	Signal transduction mechanisms	period circadian protein homolog 3-like isoform X1 [Seriola dumerili]	biological process: response to stimulus (GO:0050896);; biological process: multicellular organismal process (GO:0032501);; biological process: single-organism process (GO:0044699);; biological process: rhythmic process (GO:0048511);; biological process: biological regulation (GO:0065007)
gene-LOC119882089	LOC119882089	0.075565	4	0.045236	3	0.031353	2	1.108398	66	0.663962	38	0.919863	57	1.45501219220726e-05	1.85854390504883	up	--	--	--	K11969|5.1e-51|rro:104673094|K11969 ariadne-2 [EC:2.3.2.31] | (RefSeq) E3 ubiquitin-protein ligase ARIH2-like isoform X2	--	--	--	IBR domain, a half RING-finger domain	--	S	Function unknown	E3 ubiquitin-protein ligase ARIH2-like [Epinephelus lanceolatus]	--
gene-slc16a13	slc16a13	4.002546000000001	276	3.271019	243	3.143231	276	13.117885999999999	1082	14.271302	1130	9.01357	765	2.25343937025182e-06	1.51608956408285	up	[G]	Carbohydrate transport and metabolism	Molecular Function: molecular_function (GO:0003674);; Molecular Function: transporter activity (GO:0005215);; Molecular Function: organic acid transmembrane transporter activity (GO:0005342);; Cellular Component: cellular_component (GO:0005575);; Cellular Component: intracellular (GO:0005622);; Cellular Component: cell (GO:0005623);; Cellular Component: cytoplasm (GO:0005737);; Cellular Component…	K08189|2.5e-217|lcf:108879989|K08189 MFS transporter, MCT family, solute carrier family 16 (monocarboxylic acid transporters), member 13 | (RefSeq) slc16a13; monocarboxylate transporter 13	--	[G]	Carbohydrate transport and metabolism	Major Facilitator Superfamily	Monocarboxylate transporter 12-B OS=Danio rerio OX=7955 GN=slc16a12b PE=2 SV=1	G	Carbohydrate transport and metabolism	monocarboxylate transporter 13 isoform X1 [Morone saxatilis]	molecular function: transporter activity (GO:0005215);; biological process: localization (GO:0051179);; cellular component: cell (GO:0005623);; cellular component: cell part (GO:0044464);; cellular component: organelle (GO:0043226);; cellular component: membrane (GO:0016020);; cellular component: membrane part (GO:0044425);; biological process: single-organism process (GO:0044699)
gene-cry1b	cry1b	9.266345	964	9.543639	1027	8.236708	1069	2.385706	298	1.554803	187	2.3027949999999997	294	5.70430307806406e-13	-1.79832991581104	down	[L]	Replication, recombination and repair	--	K02295|0.0e+00|lcf:108875411|K02295 cryptochrome | (RefSeq) cryptochrome-1-like	--	[LT]	Replication, recombination and repair;; Signal transduction mechanisms	FAD binding domain of DNA photolyase	Cryptochrome-1 OS=Gallus gallus OX=9031 GN=CRY1 PE=2 SV=1	--	--	cryptochrome-1-like isoform X1 [Echeneis naucrates]	--
gene-LOC119898709	LOC119898709	220.02939299999997	17161	173.76446900000002	14083	262.208848	25523	401.31984900000003	37481	583.4973620000001	52169	787.6734650000001	75705	0.000185329200772354	1.22868922280909	up	--	--	--	K07818|1.2e-231|lcf:108899361|K07818 perforin 1 | (RefSeq) perforin-1-like	Apoptosis (ko04210)	--	--	MAC/Perforin domain	--	S	Function unknown	perforin-1-like [Epinephelus lanceolatus]	--
gene-npas2	npas2	0.208791	35	0.172695	30	0.576522	120	2.868794	569	1.6805299999999999	319	1.1804160000000001	242	0.00141049135738367	1.4890964382338	up	--	--	Molecular Function: double-stranded DNA binding (GO:0003690);; Molecular Function: transcription factor activity, sequence-specific DNA binding (GO:0003700);; Cellular Component: nucleus (GO:0005634);; Cellular Component: transcription factor complex (GO:0005667);; Cellular Component: cytoplasm (GO:0005737);; Biological Process: circadian rhythm (GO:0007623);; Biological Process: photoperiodism (…	K09026|0.0e+00|sdu:111234344|K09026 neuronal PAS domain-containing protein 2 | (RefSeq) neuronal PAS domain-containing protein 2-like isoform X1	--	[K]	Transcription	PAS domain	Neuronal PAS domain-containing protein 2 OS=Gallus gallus OX=9031 GN=NPAS2 PE=1 SV=1	K	Transcription	neuronal PAS domain-containing protein 2 isoform X2 [Notolabrus celidotus]	molecular function: binding (GO:0005488);; biological process: biological regulation (GO:0065007);; molecular function: nucleic acid binding transcription factor activity (GO:0001071);; cellular component: cell (GO:0005623);; cellular component: organelle (GO:0043226);; cellular component: cell part (GO:0044464);; cellular component: macromolecular complex (GO:0032991);; biological process: rhyth…
gene-dbpa	dbpa	16.539392	3091	15.747433	3042	15.281397	3560	4.117815	922	2.785055	597	3.271322	754	1.48805225580164e-15	-1.90340939443373	down	--	--	Molecular Function: transcription factor activity, sequence-specific DNA binding (GO:0003700);; Biological Process: regulation of transcription from RNA polymerase II promoter (GO:0006357);;	K09057|2.3e-168|lco:104924399|K09057 hepatic leukemia factor | (RefSeq) hepatic leukemia factor	--	[K]	Transcription	Basic region leucine zipper	Transcription factor VBP OS=Gallus gallus OX=9031 GN=TEF PE=1 SV=2	K	Transcription	PREDICTED: thyrotroph embryonic factor-like [Stegastes partitus]	biological process: biological regulation (GO:0065007);; molecular function: nucleic acid binding transcription factor activity (GO:0001071)
gene-LOC119882092	LOC119882092	1.747344	150	1.24213	111	1.5634000000000001	166	3.197933	327	4.262817999999999	418	3.628546	381	0.000968794090097199	1.12406689087617	up	--	--	--	K11969|5.1e-59|rro:104673094|K11969 ariadne-2 [EC:2.3.2.31] | (RefSeq) E3 ubiquitin-protein ligase ARIH2-like isoform X2	--	--	--	--	--	--	--	E3 ubiquitin-protein ligase RNF19A-like isoform X1 [Sparus aurata]	--
gene-cat	cat	59.053646	4678	34.928684	2860	43.116669	4258	134.033371	12714	128.716507	11696	86.876984	8486	0.00294249895723116	1.14555224032062	up	[P]	Inorganic ion transport and metabolism	Molecular Function: catalase activity (GO:0004096);; Biological Process: response to oxidative stress (GO:0006979);; Molecular Function: heme binding (GO:0020037);; Biological Process: hydrogen peroxide catabolic process (GO:0042744);; Molecular Function: metal ion binding (GO:0046872);;	K03781|1.3e-299|lcf:108883043|K03781 catalase [EC:1.11.1.6] | (RefSeq) cat; catalase	Tryptophan metabolism (ko00380);; Glyoxylate and dicarboxylate metabolism (ko00630);; Carbon metabolism (ko01200);; FoxO signaling pathway (ko04068);; Peroxisome (ko04146)	[P]	Inorganic ion transport and metabolism	Catalase	Catalase OS=Danio rerio OX=7955 GN=cat PE=2 SV=1	P	Inorganic ion transport and metabolism	catalase [Oplegnathus fasciatus]	biological process: metabolic process (GO:0008152);; biological process: cellular process (GO:0009987);; biological process: single-organism process (GO:0044699);; biological process: response to stimulus (GO:0050896);; biological process: detoxification (GO:0098754);; molecular function: catalytic activity (GO:0003824);; molecular function: antioxidant activity (GO:0016209);; molecular function:…
gene-arntl2	arntl2	0.727404	74	1.123025	118	0.536728	68	3.797254	459	6.688739	774	3.648506	454	6.33779993445319e-07	1.85391300452722	up	--	--	--	--	--	--	--	--	--	--	--	--	--
gene-nfil3-5	nfil3-5	1.486931	191	0.626064	83	1.056753	169	7.006534	1073	3.641547	535	3.722546	588	0.000168757092585711	1.54996489624866	up	--	--	Molecular Function: transcription factor activity, sequence-specific DNA binding (GO:0003700);; Biological Process: circadian regulation of gene expression (GO:0032922);;	K09059|2.7e-54|ipu:108272538|K09059 nuclear factor, interleukin 3 regulated | (RefSeq) uncharacterized LOC108272538	--	[K]	Transcription	Basic region leucine zipper	Nuclear factor interleukin-3-regulated protein OS=Xenopus tropicalis OX=8364 GN=nfil3 PE=2 SV=1	K	Transcription	nuclear factor, interleukin 3 regulated, member 5 [Morone saxatilis]	biological process: biological regulation (GO:0065007);; molecular function: nucleic acid binding transcription factor activity (GO:0001071);; biological process: multicellular organismal process (GO:0032501);; biological process: single-organism process (GO:0044699);; biological process: rhythmic process (GO:0048511)
gene-LOC119917167	LOC119917167	2.187471	175	2.351882	195	1.808207	181	0.758938	73	0.83155	77	0.790289	78	0.00165645708885943	-1.12134844536726	down	--	--	Molecular Function: neuropeptide Y receptor activity (GO:0004983);; Cellular Component: integral component of membrane (GO:0016021);;	K04206|2.1e-229|lco:104940155|K04206 neuropeptide Y receptor type 4 | (RefSeq) neuropeptide Y receptor type 4	Neuroactive ligand-receptor interaction (ko04080)	[R]	General function prediction only	7 transmembrane receptor (rhodopsin family)	Neuropeptide Y receptor type 1 OS=Xenopus laevis OX=8355 GN=npy1r PE=2 SV=1	T	Signal transduction mechanisms	neuropeptide Y receptor type 4-2-like [Epinephelus lanceolatus]	biological process: cellular process (GO:0009987);; biological process: signaling (GO:0023052);; biological process: single-organism process (GO:0044699);; biological process: response to stimulus (GO:0050896);; biological process: biological regulation (GO:0065007);; molecular function: signal transducer activity (GO:0004871);; molecular function: molecular transducer activity (GO:0060089);; cel…
gene-LOC119901570	LOC119901570	0.239532	7	0.091232	3	0.089111	4	1.317999	45	1.538279	50	1.387069	49	0.000347131872742845	1.62098230405155	up	[E]	Amino acid transport and metabolism	Cellular Component: integral component of membrane (GO:0016021);; Molecular Function: oxidoreductase activity (GO:0016491);;	K00274|3.4e-74|lcf:108884103|K00274 monoamine oxidase [EC:1.4.3.4] | (RefSeq) probable flavin-containing monoamine oxidase A	Glycine, serine and threonine metabolism (ko00260);; Arginine and proline metabolism (ko00330);; Histidine metabolism (ko00340);; Tyrosine metabolism (ko00350);; Phenylalanine metabolism (ko00360);; Tryptophan metabolism (ko00380);; Drug metabolism - cytochrome P450 (ko00982)	[Q]	Secondary metabolites biosynthesis, transport and catabolism	Flavin containing amine oxidoreductase	Amine oxidase [flavin-containing] OS=Oncorhynchus mykiss OX=8022 GN=mao PE=2 SV=2	Q	Secondary metabolites biosynthesis, transport and catabolism	PREDICTED: probable flavin-containing monoamine oxidase A [Lates calcarifer]	cellular component: membrane (GO:0016020);; cellular component: membrane part (GO:0044425);; molecular function: catalytic activity (GO:0003824)
gene-lrrc73	lrrc73	1.269656	60	1.278014	63	1.642484	97	0.345112	20	0.440997	24	0.275749	16	0.00851195174079851	-1.26301514125104	down	--	--	Molecular Function: protein binding (GO:0005515);;	--	--	--	--	Leucine Rich repeat	--	S	Function unknown	leucine-rich repeat-containing protein 73 [Anabas testudineus]	molecular function: binding (GO:0005488)
Micropterus_salmoides_newGene_578	--	41.637295	3026	49.439407	3714	41.956383	3801	17.983541	1565	16.150053	1347	23.703337	2124	1.45501219220726e-05	-1.05600440406098	down	--	--	--	--	--	--	--	--	--	--	--	hypothetical protein EXN66_Car018273 [Channa argus]	--
gene-LOC119890071	LOC119890071	8.091812	1058	7.175354	969	8.097423	1319	3.791008	593	2.46008	369	2.702723	436	0.000694633737557727	-1.12164856197293	down	--	--	Molecular Function: transcription regulatory region sequence-specific DNA binding (GO:0000976);; Biological Process: circadian regulation of gene expression (GO:0032922);;	K21599|5.7e-125|lcf:108894179|K21599 circadian-associated transcriptional repressor | (RefSeq) circadian-associated transcriptional repressor-like	--	--	--	Circadian-associated transcriptional repressor	--	S	Function unknown	circadian-associated transcriptional repressor-like isoform X2 [Sander lucioperca]	molecular function: binding (GO:0005488);; biological process: multicellular organismal process (GO:0032501);; biological process: single-organism process (GO:0044699);; biological process: rhythmic process (GO:0048511);; biological process: biological regulation (GO:0065007)
gene-LOC119891830	LOC119891830	14.462264	689	12.529552	617	26.198198	1556	41.560375	2371	38.460491	2102	49.831703	2927	0.0092623826051879	1.0654505618201	up	[Z]	Cytoskeleton	Molecular Function: ATP binding (GO:0005524);; Cellular Component: cytoplasm (GO:0005737);; Cellular Component: cytoskeleton (GO:0005856);;	K05692|6.7e-213|nve:5499712|K05692 actin beta/gamma 1 | (RefSeq) actin, cytoplasmic	Phagosome (ko04145)	[Z]	Cytoskeleton	Actin	Actin, cytoplasmic 1 OS=Xenopus laevis OX=8355 GN=actb PE=1 SV=1	Z	Cytoskeleton	actin, non-muscle 6.2 [Etheostoma spectabile]	molecular function: binding (GO:0005488);; cellular component: cell (GO:0005623);; cellular component: cell part (GO:0044464);; cellular component: organelle (GO:0043226)
gene-tap2a	tap2a	7.300899	459	6.928379	450	6.471945	507	14.309824	1077	14.225037	1025	18.165535	1407	1.39280674342309e-07	1.12858087668638	up	[V]	Defense mechanisms	Molecular Function: ATP binding (GO:0005524);; Cellular Component: integral component of membrane (GO:0016021);; Molecular Function: ATPase activity (GO:0016887);; Molecular Function: ATPase activity, coupled to transmembrane movement of substances (GO:0042626);;	K05654|0.0e+00|lco:104933388|K05654 ATP-binding cassette, subfamily B (MDR/TAP), member 3 | (RefSeq) antigen peptide transporter 2	ABC transporters (ko02010);; Phagosome (ko04145);; Herpes simplex virus 1 infection (ko05168)	[U]	Intracellular trafficking, secretion, and vesicular transport	ABC transporter transmembrane region	Mitochondrial potassium channel ATP-binding subunit OS=Danio rerio OX=7955 GN=abcb8 PE=2 SV=2	U	Intracellular trafficking, secretion, and vesicular transport	transporter-associated with antigen processing 2 [Oplegnathus fasciatus]	molecular function: binding (GO:0005488);; cellular component: membrane (GO:0016020);; cellular component: membrane part (GO:0044425);; molecular function: catalytic activity (GO:0003824);; biological process: localization (GO:0051179);; molecular function: transporter activity (GO:0005215)
gene-hpgd	hpgd	0.698089	31	1.07894	49	0.684116	38	5.457230999999999	283	4.59496	229	2.8830359999999997	154	1.63970153405477e-05	1.69455597579578	up	[IQR]	Lipid transport and metabolism;; Secondary metabolites biosynthesis, transport and catabolism;; General function prediction only	Molecular Function: oxidoreductase activity (GO:0016491);;	K00069|3.1e-140|lcf:108900113|K00069 15-hydroxyprostaglandin dehydrogenase (NAD) [EC:1.1.1.141] | (RefSeq) LOW QUALITY PROTEIN: 15-hydroxyprostaglandin dehydrogenase [NAD(+)]-like	--	[IR]	Lipid transport and metabolism;; General function prediction only	short chain dehydrogenase	3-hydroxybutyrate dehydrogenase type 2 OS=Lithobates catesbeianus OX=8400 GN=bdh2 PE=2 SV=1	Q	Secondary metabolites biosynthesis, transport and catabolism	15-hydroxyprostaglandin dehydrogenase [NAD(+)] [Morone saxatilis]	molecular function: catalytic activity (GO:0003824)
gene-LOC119916780	LOC119916780	0.20241	10	0.269939	14	0.308878	19	1.205054	68	2.454266	132	1.814689	105	2.79764199420557e-05	1.7368882514376	up	--	--	Biological Process: protein polyubiquitination (GO:0000209);; Cellular Component: lysosome (GO:0005764);; Biological Process: apoptotic process (GO:0006915);; Biological Process: positive regulation of autophagy (GO:0010508);; Cellular Component: integral component of membrane (GO:0016021);; Molecular Function: ubiquitin protein ligase activity (GO:0061630);; Biological Process: negative regulati…	K15705|2.3e-117|sdu:111237916|K15705 E3 ubiquitin-protein ligase RNF152 [EC:2.3.2.27] | (RefSeq) rnf152; E3 ubiquitin-protein ligase RNF152	mTOR signaling pathway (ko04150)	[O]	Posttranslational modification, protein turnover, chaperones	zinc-RING finger domain	E3 ubiquitin-protein ligase RNF152 OS=Gallus gallus OX=9031 GN=RNF152 PE=3 SV=1	O	Posttranslational modification, protein turnover, chaperones	E3 ubiquitin-protein ligase RNF152 [Seriola dumerili]	biological process: metabolic process (GO:0008152);; biological process: cellular process (GO:0009987);; cellular component: cell (GO:0005623);; cellular component: organelle (GO:0043226);; cellular component: cell part (GO:0044464);; biological process: single-organism process (GO:0044699);; biological process: biological regulation (GO:0065007);; cellular component: membrane (GO:0016020);; cell…
gene-LOC119900143	LOC119900143	9.163825	131	22.332788	330	10.366321	185	4.546905	78	2.774168	46	2.968223	53	0.00875023558179185	-1.26988203574409	down	--	--	--	K17270|3.2e-55|lcf:108886830|K17270 myelin-oligodendrocyte glycoprotein | (RefSeq) myelin-oligodendrocyte glycoprotein-like	--	--	--	Immunoglobulin V-set domain	--	--	--	myelin-oligodendrocyte glycoprotein-like [Morone saxatilis]	--
gene-LOC119901095	LOC119901095	3.751412	205	1.849984	105	21.998274	1493	0.8049	53	0.358397	23	0.318816	22	0.00242041548141641	-1.43401827476267	down	[O]	Posttranslational modification, protein turnover, chaperones	Molecular Function: serine-type endopeptidase activity (GO:0004252);;	K01345|4.0e-151|lco:104919063|K01345 pancreatic endopeptidase E [EC:3.4.21.70] | (RefSeq) chymotrypsin-like elastase family member 3B	--	[E]	Amino acid transport and metabolism	Trypsin	Elastase-1 OS=Salmo salar OX=8030 PE=1 SV=1	E	Amino acid transport and metabolism	chymotrypsin-like elastase family member 3B [Sander lucioperca]	biological process: metabolic process (GO:0008152);; molecular function: catalytic activity (GO:0003824)
gene-LOC119885865	LOC119885865	0.218074	16	0.235571	17	0.278782	25	1.056893	89	1.889588	151	1.232971	106	2.79764199420557e-05	1.69246332144195	up	--	--	Biological Process: immune system process (GO:0002376);; Molecular Function: protein binding (GO:0005515);; Cellular Component: cellular_component (GO:0005575);; Cellular Component: intracellular (GO:0005622);; Cellular Component: cell (GO:0005623);; Cellular Component: nucleus (GO:0005634);; Cellular Component: cytoplasm (GO:0005737);; Biological Process: response to stress (GO:0006950);; Biolog…	K12012|6.4e-76|lcf:108892380|K12012 tripartite motif-containing protein 35 | (RefSeq) nuclear factor 7, ovary-like	--	[O]	Posttranslational modification, protein turnover, chaperones	SPRY-associated domain	Nuclear factor 7, ovary OS=Xenopus laevis OX=8355 PE=2 SV=1	O	Posttranslational modification, protein turnover, chaperones	PREDICTED: nuclear factor 7, brain-like [Lates calcarifer]	biological process: immune system process (GO:0002376);; molecular function: binding (GO:0005488);; cellular component: cell (GO:0005623);; cellular component: cell part (GO:0044464);; cellular component: organelle (GO:0043226);; biological process: response to stimulus (GO:0050896);; biological process: biological regulation (GO:0065007)
